# Supplementary material
Source: publisher figshare collection journal article supplement (https://gsajournals.figshare.com/articles/dataset/_/11687949)

# Selective sweeps under dominance and inbreeding (File S1)

Matthew Hartfield<sup>1,2,3</sup> and Thomas Bataillon<sup>2</sup>

1 – Department of Ecology and Evolutionary Biology, University of Toronto, Ontario, Canada.

2 – Bioinformatics Research Centre, University of Aarhus, 8000C Aarhus, Denmark.

3 – Institute of Evolutionary Biology, The University of Edinburgh, Edinburgh EH9 3FL, United Kingdom.

Supplementary *Mathematica* File, analytical results.

Comments to [m.hartfield@ed.ac.uk](mailto:m.hartfield@ed.ac.uk).

## Clearing workspace and setting up libraries

Note this notebook uses the “ErrorBarPlots” package, which has to be installed before use.

```
ClearAll["`*"];  
Needs["ErrorBarPlots`"]
```

---

## Section A: Derivation of $\mathbb{E}[\pi_{SV} / \pi_0]$ while considering coalescence during the sweep phase

In this scenario, there are four possible outcomes:

- (1) Coalescence during the sweep phase;
- (2) Recombination during the sweep phase;
- (3) Coalescence during the standing phase;
- (4) Recombination during the standing phase.

If events (1), (3) occur then  $\pi \approx 0$ .

If events (2), (4) occur then  $\pi \approx \pi_0$ , the background levels of diversity.

Hence  $\mathbb{E}(\pi / \pi_0) = P(\text{Event 2}) + P(\text{Event 4})$ .

Going through these in turn;

To calculate  $P(\text{Event 2})$ , we need to determine the probabilities that (i) no event (coalescence or recombination) occurs in the sweep phase when the derived allele is between a frequency of  $p$  to 1; (ii) recombination occurs at frequency  $p$ ; (iii) integrating this solution over all frequencies  $p$  to 1.

To calculate  $P(\text{Event 4})$ , we need to determine the probabilities that (i) no event (coalescence or recombination) occurs in the sweep phase when the derived allele is between a frequency of  $p_0$  to 1; (ii) recombination occurs during the standing phase where the derived allele is at a fixed frequency of  $p_0$ .

Let's look at the relative probability of each event over each timestep.

If the frequency of the beneficial allele is  $p$  at a certain time, then the probability of coalescence is  $\frac{1}{2Np} = \frac{1+F}{2Np}$ . The probability of one of the two samples recombining out is  $2r(1-2F+\Phi)(1-p)$ .

The probability of no action occurring at any timepoint is  $1 - \frac{1}{2Np} - 2r(1-2F+\Phi)(1-p)$ . The total probability of neither action over the entire sweep phase is

$\approx \text{Exp}\left[-\int_{t=0}^{t_f} \left(\frac{1+F}{2Np} + 2r(1-2F+\Phi)(1-p)\right) dt\right]$  for fixation time  $t_f$ , or

$$\int_{p=1-\epsilon}^{p_0} \frac{\left(\frac{1+F}{2Np} + 2r(1-2F+\Phi)(1-p)\right)}{dp/dt} dp.$$

The sum of the coalescence and recombination probabilities are:

$$2r(1-2F+\Phi)(1-p) + \frac{1+F}{2Na p} \quad // \text{ Together}$$

$$\frac{1}{2Na p} (1+F+4Na p r - 8FNa p r - 4Na p^2 r + 8FNa p^2 r + 4Na p r \Phi - 4Na p^2 r \Phi)$$

Tidying up:

$$\frac{1+F+4Na p (1-p)(1-2F+\Phi)r}{2Na p} -$$

$$\left\{ \frac{1}{2Na p} (1+F+4Na p r - 8FNa p r - 4Na p^2 r + 8FNa p^2 r + 4Na p r \Phi - 4Na p^2 r \Phi) \right\} //$$

FullSimplify

{0}

Dividing by  $-s(1-p)p(F+h-Fh+(1-F)(1-2h)p)$  and taking the indefinite integral;

$$\begin{aligned}
& \text{Integrate}[-((1 + F + 4 \text{Na } p (1 - p) (1 - 2 F + \Phi) r) / \\
& \quad ((2 \text{Na } p) (s (1 - p) p (F + h - F h + (1 - F) (1 - 2 h) p))), p] // \text{Simplify} \\
& - \frac{1}{2 \text{Na } s} \left( - \frac{1 + F}{(F + h - F h) p} - \frac{(1 + F) \text{Log}[1 - p]}{1 + (-1 + F) h} + \right. \\
& \quad \left( (-1 + F + F^2 (2 - 8 \text{Na } r + h (-3 + 8 \text{Na } r)) + h (3 + 4 \text{Na } r (1 + \Phi)) - \right. \\
& \quad \quad \left. 4 F \text{Na } r (-1 - \Phi + h (3 + \Phi))) \text{Log}[p] \right) / (F + h - F h)^2 - \\
& \quad \frac{1}{(1 + (-1 + F) h) (F + h - F h)^2} \left( -1 + F^3 (-1 + h (4 - 8 \text{Na } r) + h^2 (-4 + 8 \text{Na } r)) + \right. \\
& \quad \quad 4 h (1 + \text{Na } r (1 + \Phi)) - 4 h^2 (1 + \text{Na } r (1 + \Phi)) + \\
& \quad \quad F (1 + 4 \text{Na } r (1 + \Phi) - 4 h (1 + 2 \text{Na } r (2 + \Phi)) + 4 h^2 (1 + 2 \text{Na } r (2 + \Phi))) + \\
& \quad \quad \left. F^2 (1 - 8 \text{Na } r + 4 h (-1 + \text{Na } r (5 + \Phi)) - 4 h^2 (-1 + \text{Na } r (5 + \Phi))) \right) \\
& \quad \left. \text{Log}[F + h + p - F p - 2 h p + F h (-1 + 2 p)] \right)
\end{aligned}$$

We can use this integral to calculate (A) the probability of recombination during the sweep phase; (B) the probability of recombination during the standing phase, given no actions during the sweep phase.

The total probability of no event occurring for frequency  $p$  is the difference of this integral between  $p$  and  $1 - \epsilon$  (where  $\epsilon$  is the effective fixed frequency of the derived allele). This term is then multiplied by  $(2 r (1 - 2F + \Phi)(1 - p))$  to determine the probability that recombination acts at frequency  $p$ .

(A) can be calculated by integrating the total recombination probability between  $p_0$  and  $1 - \epsilon$ , again after dividing by  $dp/dt$  to convert from a time integral into a frequency integral. It does not appear that this integral has an analytical solution, so this integral is instead integrated numerically.

(B) can be calculated by working out (i) the probability of no event acting between frequency  $p_0$  and  $1 - \epsilon$ , and (ii) multiplying it by the probability that a recombination event takes precedence over coalescence in the standing phase.

(i) is obtained by taking the integral solution between  $p_0$  and 1. For (ii), the probability is equal to:

$$\begin{aligned}
& \frac{2 r (1 - 2 F + \Phi) (1 - p_0)}{\frac{1 + F}{2 \text{Na } p_0} + 2 r (1 - 2 F + \Phi) (1 - p_0)} // \text{FullSimplify} \\
& (4 \text{Na } (-1 + p_0) p_0 r (-1 + 2 F - \Phi)) / (1 + F + 8 F \text{Na } (-1 + p_0) p_0 r - 4 \text{Na } (-1 + p_0) p_0 r (1 + \Phi))
\end{aligned}$$

Which can be rewritten as:

$$\begin{aligned}
& \frac{4 \text{Na } r (1 - 2 F + \Phi) (1 - p_0) p_0}{1 + F + 4 \text{Na } r (1 - 2 F + \Phi) (1 - p_0) p_0} - \{ (4 \text{Na } (-1 + p_0) p_0 r (-1 + 2 F - \Phi)) / \\
& \quad (1 + F + 8 F \text{Na } (-1 + p_0) p_0 r - 4 \text{Na } (-1 + p_0) p_0 r (1 + \Phi)) \} // \text{Simplify} \\
& \{0\}
\end{aligned}$$

## Deriving the star-like approximation for $P_{\text{NR}}$

Next we derive  $P_{\text{NR}} = \text{Exp}[-r_{\text{eff}} \int_{1-\epsilon}^{p_0} \frac{1-p}{-dp/dt} dp]$  for a small factor  $\epsilon$  denoting the upper limit of the deter-

ministic equation, and the starting allele frequency  $p_0$ . Below is  $\frac{1-p}{-dp/dt}$ :

$$\frac{1-p}{-s(1-p)p(F+h-Fh+(1-F)(1-2h)p)} // \text{Simplify}$$

$$-\frac{1}{p(F+h-Fh+(-1+F)(-1+2h)p)s}$$

Separating out the fraction after removing the  $\frac{1}{s}$  term:

$$\text{Apart}\left[-\frac{1}{p(F+h-Fh+(-1+F)(-1+2h)p)}\right]$$

$$\frac{1}{(-F-h+Fh)p} + (-1+F+2h-2Fh) / ((-F-h+Fh)(F+h-Fh+(1-F-2h+2Fh)p))$$

The first fraction can be written as:

$$-\frac{1}{(F+h-Fh)p} - \left\{ \frac{1}{(-F-h+Fh)p} \right\} // \text{Simplify}$$

$$\{0\}$$

The second fraction can be written as:

$$\frac{1-F-2h(1-F)}{(F+h-Fh)(F+h-Fh+(1-F)(1-2h)p)} - \{(-1+F+2h-2Fh) / ((-F-h+Fh)(F+h-Fh+(1-F-2h+2Fh)p))\} // \text{FullSimplify}$$

$$\{0\}$$

Integrating the first fraction over p:

$$\text{Integrate}\left[-\frac{1}{(F+h-Fh)p}, p\right]$$

$$-\frac{\text{Log}[p]}{F+h-Fh}$$

Integrating the second fraction over p, after tidying it up:

$$(1-2h-F(1-2h)) / ((F+h-Fh)(F+h-Fh+(1-2h-F(1-2h))p)) - \{(-1+F+2h-2Fh) / ((-F-h+Fh)(F+h-Fh+(1-F-2h+2Fh)p))\} // \text{FullSimplify}$$

$$\{0\}$$

$$\text{Integrate}[(-1+F+2h-2Fh) / ((-F-h+Fh)(F+h-Fh+(1-F-2h+2Fh)p)), p] // \text{FullSimplify}$$

$$\frac{\text{Log}[F+h-Fh+(-1+F)(-1+2h)p]}{F+h-Fh}$$

Putting the two parts together and tidying up:

$$\begin{aligned}
& - \frac{\text{Log}[p]}{F+h-Fh} + \frac{\text{Log}[F+h-Fh+(-1+F)(-1+2h)p]}{F+h-Fh} // \text{FullSimplify} \\
& - \frac{\text{Log}[p] - \text{Log}[F+h-Fh+(-1+F)(-1+2h)p]}{F+h-Fh} \\
& \frac{\text{Log}[F+h-Fh+(1-F)(1-2h)p] - \text{Log}[p]}{F+h-Fh} - \\
& \left\{ - \frac{1}{F+h-Fh} (\text{Log}[p] - \text{Log}[F+h-Fh+(-1+F)(-1+2h)p]) \right\} // \text{FullSimplify} \\
& \{0\}
\end{aligned}$$

Integrating between  $p_0$  and  $1-\epsilon$ :

$$\begin{aligned}
& \left( \frac{1}{F+h-Fh} (\text{Log}[F+h-Fh+(1-F)(1-2h)p] - \text{Log}[p]) \right) /. p \rightarrow p_0 - \\
& \left( \frac{1}{F+h-Fh} (\text{Log}[F+h-Fh+(1-F)(1-2h)p] - \text{Log}[p]) \right) /. p \rightarrow 1-\epsilon // \text{FullSimplify} \\
& - \frac{1}{F+h-Fh} (\text{Log}[p_0] - \text{Log}[F+h-Fh+(-1+F)(-1+2h)p_0]) - \\
& \text{Log}[1-\epsilon] + \text{Log}[1+(-1+F)\epsilon+h(-1+F+2\epsilon-2F\epsilon)]
\end{aligned}$$

This solution can be rewritten as a single Log term:

$$\begin{aligned}
& \frac{1}{F+h-Fh} * \text{Log} \left[ \frac{(F+h-Fh-(1-F)(1-2h)p_0)(1-\epsilon)}{p_0(1-(1-F)(\epsilon+h(1-2\epsilon)))} \right] \\
& \frac{\text{Log} \left[ \frac{(F+h-Fh-(1-F)(1-2h)p_0)(1-\epsilon)}{p_0(1-(1-F)(\epsilon+h(1-2\epsilon)+\epsilon))} \right]}{F+h-Fh}
\end{aligned}$$

$P_{NR}$  follows by multiplying by  $-\frac{r_{eff}}{s}$  and taking the exponential:

$$\begin{aligned}
& \text{Exp} \left[ - \frac{r_{eff}}{s(F+h-Fh)} \text{Log} \left[ \frac{(F+h-Fh-(1-F)(1-2h)p_0)(1-\epsilon)}{p_0(1-(1-F)(\epsilon+h(1-2\epsilon)))} \right] \right] // \text{Simplify} \\
& (((F+h-Fh-(-1+F)(-1+2h)p_0)(1-\epsilon)) / (p_0-(1-F)p_0(h+\epsilon-2h\epsilon)))^{-\frac{r_{eff}}{(F+h-Fh)s}}
\end{aligned}$$

We can write this equation in a neater form by using  $HL = F+h-Fh$ ,  $HH = 1-h+Fh$ :

`Solve[HL == F+h-Fh && HH == 1-h+Fh, {F, h}] // FullSimplify`

$$\left\{ \left\{ F \rightarrow -1+HH+HL, h \rightarrow \frac{-1+HH}{-2+HH+HL} \right\} \right\}$$

$$\begin{aligned}
& (((F+h-Fh-(-1+F)(-1+2h)p_0)(1-\epsilon)) / (p_0-(1-F)p_0(h+\epsilon-2h\epsilon)))^{-\frac{r_{eff}}{(F+h-Fh)s}} /. \\
& \left\{ F \rightarrow -1+HH+HL, h \rightarrow \frac{-1+HH}{-2+HH+HL} \right\} // \text{FullSimplify} \\
& \left( \frac{(HL-HH p_0+HL p_0)(-1+\epsilon)}{p_0(HH(-1+\epsilon)-HL\epsilon)} \right)^{-\frac{r_{eff}}{HL s}}
\end{aligned}$$

Tidying up:

$$\left( \frac{(HL + p0 (HL - HH)) (1 - \epsilon)}{p0 (HH + \epsilon (HL - HH))} \right)^{-\frac{r_{eff}}{HL s}} - \left\{ \left( \frac{(HL - HH p0 + HL p0) (-1 + \epsilon)}{p0 (HH (-1 + \epsilon) - HL \epsilon)} \right)^{-\frac{r_{eff}}{HL s}} \right\} // \text{Simplify}$$

{ 0 }

If using  $\epsilon = 0$  this solution simplifies to:

$$\left( \frac{(HL + p0 (HL - HH)) (1 - \epsilon)}{p0 (HH + \epsilon (HL - HH))} \right)^{-\frac{r_{eff}}{HL s}} /. \epsilon \rightarrow 0$$

$$\left( \frac{HL + (-HH + HL) p0}{HH p0} \right)^{-\frac{r_{eff}}{HL s}}$$

Which can be written in the desired form after some rewriting:

$$\frac{HL + (-HH + HL) p0}{HH p0} // \text{Apart}$$

$$- \frac{HH - HL}{HH} + \frac{HL}{HH p0}$$

$$- \frac{HH - HL}{HH} // \text{Apart}$$

$$- 1 + \frac{HL}{HH}$$

$$\left( \frac{HL}{HH} \left( \frac{1}{p0} + 1 \right) - 1 \right)^{-\frac{r_{eff}}{HL s}} - \left\{ \left( \frac{HL + (-HH + HL) p0}{HH p0} \right)^{-\frac{r_{eff}}{HL s}} \right\} // \text{Simplify}$$

{ 0 }

## Section B: Derivation of effective starting frequency from a *de novo* mutation

This code was based on a *Mathematica* notebook provided by Sarah Otto (University of British Columbia).

### Original haploid derivation

Following Ewens' (2004) derivation of the fixation probability in his book for the haploid model we have:

$$\phi[x_] = \text{Exp}[-\text{Simplify}[\text{Integrate}[2 ((1 - x) x \psi) / ((1 - x) x), x]]]$$

$$e^{-2 x \psi}$$

where  $\psi = Ns$  and

$$Sx[x_] = \text{Simplify}[\text{Integrate}[\phi[x], x]]$$

$$- \frac{e^{-2 x \psi}}{2 \psi}$$

which are used in the fixation probability (Eq. 4.17):

$$\text{fix}[p_0, \psi] = \text{Simplify}\left[\frac{(Sx[x_0] - Sx[0])}{(Sx[1] - Sx[0])} /. x_0 \rightarrow p_0\right]$$

$$\frac{e^{2\psi} (1 - e^{-2p_0\psi})}{-1 + e^{2\psi}}$$

The time spent at frequency  $x < p$  (conditional on fixation) is then given by (4.22):

$$\text{Simplify}\left[\frac{2(1 - \text{fix}[p_0, \psi])}{(x(1-x)\phi[x])} \text{Integrate}[\phi[y], \{y, 0, x\}]\right]$$

$$\frac{e^{-2p_0\psi} (-e^{2\psi} + e^{2p_0\psi}) (-1 + e^{2x\psi})}{(-1 + e^{2\psi}) (-1 + x) x \psi}$$

while the time spent at frequency  $x > p$  (conditional on fixation) is given by (4.23)

$$\text{Simplify}\left[\frac{2 \text{fix}[p_0, \psi]}{(x(1-x)\phi[x])} \text{Integrate}[\phi[y], \{y, x, 1\}]\right]$$

$$\frac{e^{-2p_0\psi} (-1 + e^{2p_0\psi}) (-e^{2\psi} + e^{2x\psi})}{(-1 + e^{2\psi}) (-1 + x) x \psi}$$

Assuming  $p_0=1/N$ , only the latter is relevant (the system cannot spend time below this frequency if it will fix).

By comparison, the time spent at frequency  $x$  in the deterministic process is given by:  $\frac{1}{\psi(1-x)x}$

(this is obtained by rearranging  $dx/dt = sx(1-x)$  and then measuring time in units of  $N$  generations).

A simple estimate of the acceleration is given by taking the time spent at  $x=p_0$  in the diffusion process and equating this to the time in the deterministic process at an accelerated position  $x=\alpha p_0$ .

$$\frac{e^{-2p_0\psi} (-1 + e^{2p_0\psi}) (-e^{2\psi} + e^{2x\psi})}{(-1 + e^{2\psi}) (-1 + x) x \psi} /. x \rightarrow p_0$$

$$\frac{e^{-2p_0\psi} (-1 + e^{2p_0\psi}) (-e^{2\psi} + e^{2p_0\psi})}{(-1 + e^{2\psi}) (-1 + p_0) p_0 \psi}$$

$$\left(\frac{1}{\psi(1-x)x} /. x \rightarrow \alpha p_0\right)$$

$$\frac{1}{p_0 \alpha (1 - p_0 \alpha) \psi}$$

Given that  $p_0$  is very small, the latter can be approximated as  $\frac{1}{p_0 \alpha \psi}$ , allowing us to solve for the acceleration:

$$\text{Solve}\left[\frac{e^{-2p_0\psi} (-1 + e^{2p_0\psi}) (-e^{2\psi} + e^{2p_0\psi})}{(-1 + e^{2\psi}) (-1 + p_0) p_0 \psi} == \frac{1}{p_0 \alpha \psi}, \alpha\right] // \text{Flatten}$$

$$\left\{\alpha \rightarrow \frac{e^{2p_0\psi} (-1 + e^{2\psi}) (-1 + p_0)}{(-1 + e^{2p_0\psi}) (-e^{2\psi} + e^{2p_0\psi})}\right\}$$

To leading order in  $p_0$ , this is:

Normal[Series[( $\alpha$  /. %), {p0, 0, -1}]]

$$\frac{1}{2 p_0 \psi}$$

Setting  $p_0=1/N$  and  $\psi=Ns$ , we get that the acceleration is approximately equivalent to starting at an allele frequency that is  $\frac{1}{2s}$  times higher than the initial allele frequency, as used in the simulations of Otto and Barton (1997).

$$\frac{1}{2 p_0 \psi} /. \left\{ p_0 \rightarrow \frac{1}{Na}, \psi \rightarrow Na s \right\}$$

$$\frac{1}{2 s}$$

## Diploid derivation (including dominance and selfing)

Following Ewens' (2004) derivation of the fixation probability in his book for the haploid model we have:

$$\phi[x_] = \text{Exp}[-\text{Simplify}[\text{Integrate}[2 ((1-x) x (F+h-F h + (1-F) (1-2 h) x) \psi) / ((1-x) x), x]]]$$

$$e^{-x (2 F+2 h-2 F h+(-1+F) (-1+2 h) x) \psi}$$

where  $\psi = 2 N e s$  and

$$Sx[x_] = \text{Simplify}[\text{Integrate}[\phi[x], x]]$$

$$\left( e^{\frac{(F+h-F h)^2 \psi}{(-1+F) (-1+2 h)}} \sqrt{\pi} \text{Erf}\left[\frac{(F+h+x-F x-2 h x+F h (-1+2 x)) \sqrt{\psi}}{\sqrt{-1+F} \sqrt{-1+2 h}}\right] \right) / \left( 2 \sqrt{-1+F} \sqrt{-1+2 h} \sqrt{\psi} \right)$$

which are used in the fixation probability (Eq 4.17):

$$\text{fix}[p_0_, \psi_] = \text{Simplify}[\text{Integrate}[\phi[x], \{x, 0, x_0\}] / \text{Integrate}[\phi[x], \{x, 0, 1\}] /. x_0 \rightarrow p_0]$$

$$\left( -\text{Erf}\left[\frac{(F+h-F h) \sqrt{\psi}}{\sqrt{-1+F} \sqrt{-1+2 h}}\right] + \text{Erf}\left[\frac{(F+h-F h+(-1+F) (-1+2 h) p_0) \sqrt{\psi}}{\sqrt{-1+F} \sqrt{-1+2 h}}\right] \right) /$$

$$\left( \text{Erf}\left[\frac{(1+(-1+F) h) \sqrt{\psi}}{\sqrt{-1+F} \sqrt{-1+2 h}}\right] - \text{Erf}\left[\frac{(F+h-F h) \sqrt{\psi}}{\sqrt{-1+F} \sqrt{-1+2 h}}\right] \right)$$

However, Pfix here is undefined for  $F = 1$  and/or  $h = \frac{1}{2}$ . As with the outcrossing case an approximation can be obtained by instead using  $e^{-2 (F+h-F h) x \psi}$  to obtain  $P_{\text{fix}} = \frac{-1+e^{2 (F (-1+h)-h) p_0 \psi}}{-1+e^{2 (F (-1+h)-h) \psi}}$ . Note this equation becomes inaccurate for  $x_0 \gg \frac{1}{2N}$  (see Glémin 2012 Theor. Popul. Biol. for a more complete derivation).

The time spent at frequency  $x < p$  (conditional on fixation) is then given by (4.22):



$$\begin{aligned}
& \text{Simplify}\left[\frac{2 \text{fix}[p0, \psi]}{(x(1-x)\phi[x])} \text{Integrate}[\phi[y], \{y, 0, x\}]\right] \\
& \left( e^{\frac{(F+h-x-Fx-2hx+Fh(-1+2x))^2 \psi}{(-1+F)(-1+2h)}} \sqrt{\pi} \left( \text{Erf}\left[\frac{(1+(-1+F)h)\sqrt{\psi}}{\sqrt{-1+F}\sqrt{-1+2h}}\right] - \right. \right. \\
& \quad \left. \left. \text{Erf}\left[\frac{(F+h-Fh+(-1+F)(-1+2h)p0)\sqrt{\psi}}{\sqrt{-1+F}\sqrt{-1+2h}}\right] \right) \right. \\
& \quad \left( \text{Erf}\left[\frac{(F+h-Fh)\sqrt{\psi}}{\sqrt{-1+F}\sqrt{-1+2h}}\right] - \text{Erf}\left[\frac{(F+h-Fh+(-1+F)(-1+2h)x)\sqrt{\psi}}{\sqrt{-1+F}\sqrt{-1+2h}}\right] \right. \\
& \quad \left. \left. \left( \sqrt{-1+F}\sqrt{-1+2h} \right) \right) \right) \left( \sqrt{-1+F}\sqrt{-1+2h} \right. \\
& \quad \left. (-1+x)x\sqrt{\psi} \left( \text{Erf}\left[\frac{(1+(-1+F)h)\sqrt{\psi}}{\sqrt{-1+F}\sqrt{-1+2h}}\right] - \text{Erf}\left[\frac{(F+h-Fh)\sqrt{\psi}}{\sqrt{-1+F}\sqrt{-1+2h}}\right] \right) \right)
\end{aligned}$$

while the time spent at frequency  $x > p$  (conditional on fixation) is given by (4.23)

$$\begin{aligned}
& \text{Simplify}\left[\frac{2 \text{fix}[p0, \psi]}{(x(1-x)\phi[x])} \text{Integrate}[\phi[y], \{y, x, 1\}]\right] \\
& \left( e^{\frac{(F+h-x-Fx-2hx+Fh(-1+2x))^2 \psi}{(-1+F)(-1+2h)}} \sqrt{\pi} \left( \text{Erf}\left[\frac{(F+h-Fh)\sqrt{\psi}}{\sqrt{-1+F}\sqrt{-1+2h}}\right] - \right. \right. \\
& \quad \left. \left. \text{Erf}\left[\frac{(F+h-Fh+(-1+F)(-1+2h)p0)\sqrt{\psi}}{\sqrt{-1+F}\sqrt{-1+2h}}\right] \right) \right. \\
& \quad \left( \text{Erf}\left[\frac{(1+(-1+F)h)\sqrt{\psi}}{\sqrt{-1+F}\sqrt{-1+2h}}\right] - \text{Erf}\left[\frac{(F+h-Fh+(-1+F)(-1+2h)x)\sqrt{\psi}}{\sqrt{-1+F}\sqrt{-1+2h}}\right] \right. \\
& \quad \left. \left. \left( \sqrt{-1+F}\sqrt{-1+2h} \right) \right) \right) \left( \sqrt{-1+F}\sqrt{-1+2h} \right. \\
& \quad \left. (-1+x)x\sqrt{\psi} \left( \text{Erf}\left[\frac{(1+(-1+F)h)\sqrt{\psi}}{\sqrt{-1+F}\sqrt{-1+2h}}\right] - \text{Erf}\left[\frac{(F+h-Fh)\sqrt{\psi}}{\sqrt{-1+F}\sqrt{-1+2h}}\right] \right) \right)
\end{aligned}$$

Assuming  $p0=1/2N$ , only the latter is relevant (the system cannot spend time below this frequency if it will fix).

By comparison, the time spent at frequency  $x$  in the deterministic process is given by:

$$\frac{1}{((1-x)x(F+h-Fh+(1-F)(1-2h)x)\psi)}$$

A simple estimate of the acceleration is given by taking the time spent at  $x=p0$  in the diffusion process and equating this to the time in the deterministic process at an accelerated position  $x=\alpha p0$ .

$$\begin{aligned}
& \left( e^{\frac{(F+h-x-F x-2 h x+F h (-1+2 x))^2 \psi}{(-1+F) (-1+2 h)}} \sqrt{\pi} \left( \operatorname{Erf}\left[\frac{(F+h-F h) \sqrt{\psi}}{\sqrt{-1+F} \sqrt{-1+2 h}}\right] - \right. \right. \\
& \quad \left. \left. \operatorname{Erf}\left[\left((F+h-F h+(-1+F) (-1+2 h) p_0) \sqrt{\psi}\right) / \left(\sqrt{-1+F} \sqrt{-1+2 h}\right)\right] \right) \right. \\
& \quad \left( \operatorname{Erf}\left[\frac{(1+(-1+F) h) \sqrt{\psi}}{\sqrt{-1+F} \sqrt{-1+2 h}}\right] - \operatorname{Erf}\left[\left((F+h-F h+(-1+F) (-1+2 h) x) \sqrt{\psi}\right) / \right. \right. \\
& \quad \left. \left. \left(\sqrt{-1+F} \sqrt{-1+2 h}\right)\right] \right) \right) / \left( \sqrt{-1+F} \sqrt{-1+2 h} (-1+x) x \right. \\
& \quad \left. \sqrt{\psi} \left( \operatorname{Erf}\left[\frac{(1+(-1+F) h) \sqrt{\psi}}{\sqrt{-1+F} \sqrt{-1+2 h}}\right] - \operatorname{Erf}\left[\frac{(F+h-F h) \sqrt{\psi}}{\sqrt{-1+F} \sqrt{-1+2 h}}\right] \right) \right) / . x \rightarrow p_0 \\
& \left( e^{\frac{(F+h-p_0-F p_0-2 h p_0+F h (-1+2 p_0))^2 \psi}{(-1+F) (-1+2 h)}} \sqrt{\pi} \right. \\
& \quad \left( \operatorname{Erf}\left[\frac{(1+(-1+F) h) \sqrt{\psi}}{\sqrt{-1+F} \sqrt{-1+2 h}}\right] - \operatorname{Erf}\left[\frac{(F+h-F h+(-1+F) (-1+2 h) p_0) \sqrt{\psi}}{\sqrt{-1+F} \sqrt{-1+2 h}}\right] \right) \\
& \quad \left( \operatorname{Erf}\left[\frac{(F+h-F h) \sqrt{\psi}}{\sqrt{-1+F} \sqrt{-1+2 h}}\right] - \operatorname{Erf}\left[\frac{(F+h-F h+(-1+F) (-1+2 h) p_0) \sqrt{\psi}}{\sqrt{-1+F} \sqrt{-1+2 h}}\right] \right) \right) / \left( \sqrt{-1+F} \right. \\
& \quad \left. \sqrt{-1+2 h} (-1+p_0) p_0 \sqrt{\psi} \left( \operatorname{Erf}\left[\frac{(1+(-1+F) h) \sqrt{\psi}}{\sqrt{-1+F} \sqrt{-1+2 h}}\right] - \operatorname{Erf}\left[\frac{(F+h-F h) \sqrt{\psi}}{\sqrt{-1+F} \sqrt{-1+2 h}}\right] \right) \right) \\
& \left( \frac{1}{(1-x) x (F+h-F h+(1-F) (1-2 h) x) \psi} / . x \rightarrow \alpha p_0 \right) \\
& 1 / (p_0 \alpha (1-p_0 \alpha) (F+h-F h+(1-F) (1-2 h) p_0 \alpha) \psi) \\
& \text{Series}[1 / (p_0 \alpha (1-p_0 \alpha) (F+h-F h+(1-F) (1-2 h) p_0 \alpha) \psi), \{p_0, 0, -1\}] \\
& \frac{1}{(F+h-F h) \alpha \psi p_0} + O[p_0]^0
\end{aligned}$$

Given that  $p_0$  is very small, the latter can be approximated as  $\frac{1}{(F+h-F h) \alpha \psi p_0}$ , allowing us to solve for the acceleration:

$$\begin{aligned}
& \text{Solve} \left[ \left[ e^{\frac{(F+h+p\theta-F p\theta-2 h p\theta+F h (-1+2 p\theta))^2 \psi}{(-1+F) (-1+2 h)}} \sqrt{\pi} \left( \text{Erf} \left[ \frac{(1+(-1+F) h) \sqrt{\psi}}{\sqrt{-1+F} \sqrt{-1+2 h}} \right] - \right. \right. \right. \\
& \quad \left. \left. \left. \text{Erf} \left[ \left( (F+h-F h+(-1+F) (-1+2 h) p\theta) \sqrt{\psi} \right) / \left( \sqrt{-1+F} \sqrt{-1+2 h} \right) \right] \right) \right. \right. \\
& \quad \left. \left( \text{Erf} \left[ \frac{(F+h-F h) \sqrt{\psi}}{\sqrt{-1+F} \sqrt{-1+2 h}} \right] - \text{Erf} \left[ \left( (F+h-F h+(-1+F) (-1+2 h) p\theta) \sqrt{\psi} \right) / \right. \right. \right. \\
& \quad \left. \left. \left. \left( \sqrt{-1+F} \sqrt{-1+2 h} \right) \right] \right) \right) \right] / \left( \sqrt{-1+F} \sqrt{-1+2 h} (-1+p\theta) \right. \\
& \quad \left. p\theta \sqrt{\psi} \left( \text{Erf} \left[ \frac{(1+(-1+F) h) \sqrt{\psi}}{\sqrt{-1+F} \sqrt{-1+2 h}} \right] - \text{Erf} \left[ \frac{(F+h-F h) \sqrt{\psi}}{\sqrt{-1+F} \sqrt{-1+2 h}} \right] \right) \right) == \\
& \quad \frac{1}{(F+h-F h) \alpha \psi p\theta}, \alpha \Big] // \text{Flatten} \\
& \left\{ \alpha \rightarrow \left( \sqrt{-1+F} \sqrt{-1+2 h} \text{Erf} \left[ \frac{(1+(-1+F) h) \sqrt{\psi}}{\sqrt{-1+F} \sqrt{-1+2 h}} \right] - \right. \right. \\
& \quad \left. \sqrt{-1+F} \sqrt{-1+2 h} p\theta \text{Erf} \left[ \frac{(1+(-1+F) h) \sqrt{\psi}}{\sqrt{-1+F} \sqrt{-1+2 h}} \right] - \sqrt{-1+F} \sqrt{-1+2 h} \right. \\
& \quad \left. \left. \text{Erf} \left[ \frac{(F+h-F h) \sqrt{\psi}}{\sqrt{-1+F} \sqrt{-1+2 h}} \right] + \sqrt{-1+F} \sqrt{-1+2 h} p\theta \text{Erf} \left[ \frac{(F+h-F h) \sqrt{\psi}}{\sqrt{-1+F} \sqrt{-1+2 h}} \right] \right) / \right. \\
& \quad \left( -e^{\frac{(F+h+p\theta-F p\theta-2 h p\theta+F h (-1+2 p\theta))^2 \psi}{(-1+F) (-1+2 h)}} F \sqrt{\pi} \sqrt{\psi} \text{Erf} \left[ \frac{(1+(-1+F) h) \sqrt{\psi}}{\sqrt{-1+F} \sqrt{-1+2 h}} \right] \text{Erf} \left[ \frac{(F+h-F h) \sqrt{\psi}}{\sqrt{-1+F} \sqrt{-1+2 h}} \right] - \right. \\
& \quad e^{\frac{(F+h+p\theta-F p\theta-2 h p\theta+F h (-1+2 p\theta))^2 \psi}{(-1+F) (-1+2 h)}} h \sqrt{\pi} \sqrt{\psi} \text{Erf} \left[ \frac{(1+(-1+F) h) \sqrt{\psi}}{\sqrt{-1+F} \sqrt{-1+2 h}} \right] \text{Erf} \left[ \frac{(F+h-F h) \sqrt{\psi}}{\sqrt{-1+F} \sqrt{-1+2 h}} \right] + \\
& \quad e^{\frac{(F+h+p\theta-F p\theta-2 h p\theta+F h (-1+2 p\theta))^2 \psi}{(-1+F) (-1+2 h)}} F h \sqrt{\pi} \sqrt{\psi} \text{Erf} \left[ \frac{(1+(-1+F) h) \sqrt{\psi}}{\sqrt{-1+F} \sqrt{-1+2 h}} \right] \text{Erf} \left[ \right. \\
& \quad \left. \frac{(F+h-F h) \sqrt{\psi}}{\sqrt{-1+F} \sqrt{-1+2 h}} \right] + e^{\frac{(F+h+p\theta-F p\theta-2 h p\theta+F h (-1+2 p\theta))^2 \psi}{(-1+F) (-1+2 h)}} F \sqrt{\pi} \sqrt{\psi} \text{Erf} \left[ \frac{(1+(-1+F) h) \sqrt{\psi}}{\sqrt{-1+F} \sqrt{-1+2 h}} \right] \\
& \quad \left. \text{Erf} \left[ \left( (F+h-F h+(-1+F) (-1+2 h) p\theta) \sqrt{\psi} \right) / \left( \sqrt{-1+F} \sqrt{-1+2 h} \right) \right] + \right. \\
& \quad e^{\frac{(F+h+p\theta-F p\theta-2 h p\theta+F h (-1+2 p\theta))^2 \psi}{(-1+F) (-1+2 h)}} h \sqrt{\pi} \sqrt{\psi} \text{Erf} \left[ \frac{(1+(-1+F) h) \sqrt{\psi}}{\sqrt{-1+F} \sqrt{-1+2 h}} \right] \\
& \quad \left. \text{Erf} \left[ \left( (F+h-F h+(-1+F) (-1+2 h) p\theta) \sqrt{\psi} \right) / \left( \sqrt{-1+F} \sqrt{-1+2 h} \right) \right] - \right. \\
& \quad e^{\frac{(F+h+p\theta-F p\theta-2 h p\theta+F h (-1+2 p\theta))^2 \psi}{(-1+F) (-1+2 h)}} F h \sqrt{\pi} \sqrt{\psi} \text{Erf} \left[ \frac{(1+(-1+F) h) \sqrt{\psi}}{\sqrt{-1+F} \sqrt{-1+2 h}} \right] \\
& \quad \left. \text{Erf} \left[ \left( (F+h-F h+(-1+F) (-1+2 h) p\theta) \sqrt{\psi} \right) / \left( \sqrt{-1+F} \sqrt{-1+2 h} \right) \right] + \right. \\
& \quad \left. e^{\frac{(F+h+p\theta-F p\theta-2 h p\theta+F h (-1+2 p\theta))^2 \psi}{(-1+F) (-1+2 h)}} F \sqrt{\pi} \sqrt{\psi} \text{Erf} \left[ \frac{(F+h-F h) \sqrt{\psi}}{\sqrt{-1+F} \sqrt{-1+2 h}} \right] \right\}
\end{aligned}$$

$$\begin{aligned}
& \text{Erf} \left[ \left( (F+h-Fh+(-1+F)(-1+2h)p_0) \sqrt{\psi} \right) / \left( \sqrt{-1+F} \sqrt{-1+2h} \right) \right] + \\
& e^{\frac{(F+h)p_0-Fp_0-2hp_0+Fh(-1+2p_0))^2 \psi}{(-1+F)(-1+2h)}} h \sqrt{\pi} \sqrt{\psi} \text{Erf} \left[ \frac{(F+h-Fh) \sqrt{\psi}}{\sqrt{-1+F} \sqrt{-1+2h}} \right] \\
& \text{Erf} \left[ \left( (F+h-Fh+(-1+F)(-1+2h)p_0) \sqrt{\psi} \right) / \left( \sqrt{-1+F} \sqrt{-1+2h} \right) \right] - \\
& e^{\frac{(F+h)p_0-Fp_0-2hp_0+Fh(-1+2p_0))^2 \psi}{(-1+F)(-1+2h)}} F h \sqrt{\pi} \sqrt{\psi} \text{Erf} \left[ \frac{(F+h-Fh) \sqrt{\psi}}{\sqrt{-1+F} \sqrt{-1+2h}} \right] \\
& \text{Erf} \left[ \left( (F+h-Fh+(-1+F)(-1+2h)p_0) \sqrt{\psi} \right) / \left( \sqrt{-1+F} \sqrt{-1+2h} \right) \right] - \\
& e^{\frac{(F+h)p_0-Fp_0-2hp_0+Fh(-1+2p_0))^2 \psi}{(-1+F)(-1+2h)}} F \sqrt{\pi} \sqrt{\psi} \\
& \text{Erf} \left[ \left( (F+h-Fh+(-1+F)(-1+2h)p_0) \sqrt{\psi} \right) / \left( \sqrt{-1+F} \sqrt{-1+2h} \right) \right]^2 - \\
& e^{\frac{(F+h)p_0-Fp_0-2hp_0+Fh(-1+2p_0))^2 \psi}{(-1+F)(-1+2h)}} h \sqrt{\pi} \sqrt{\psi} \\
& \text{Erf} \left[ \left( (F+h-Fh+(-1+F)(-1+2h)p_0) \sqrt{\psi} \right) / \left( \sqrt{-1+F} \sqrt{-1+2h} \right) \right]^2 + \\
& e^{\frac{(F+h)p_0-Fp_0-2hp_0+Fh(-1+2p_0))^2 \psi}{(-1+F)(-1+2h)}} F h \sqrt{\pi} \sqrt{\psi} \\
& \left. \text{Erf} \left[ \left( (F+h-Fh+(-1+F)(-1+2h)p_0) \sqrt{\psi} \right) / \left( \sqrt{-1+F} \sqrt{-1+2h} \right) \right]^2 \right\}
\end{aligned}$$

To leading order in  $p_0$ , this is:

**Normal[Series[( $\alpha /. \%$ ), { $p_0, 0, -1$ }]]**

$$-\frac{1}{2(-F-h+Fh)p_0\psi}$$

Rewriting as:

$$\frac{1}{2(F+h-Fh)p_0\psi} - \left\{ -\frac{1}{2(-F-h+Fh)p_0\psi} \right\} // \text{FullSimplify}$$

{0}

Setting  $p_0 = 1/2N$  and  $\psi = 2Ns = \frac{2Ns}{1+F}$ , we get that the acceleration is approximately equivalent to starting at an allele frequency that exhibits the following boost:

$$\frac{1}{2(F+h-Fh)p_0\psi} /. \left\{ p_0 \rightarrow \frac{1}{2Na}, \psi \rightarrow \frac{2Na s}{1+F} \right\}$$

$$\frac{1+F}{2(F+h-Fh)s}$$

In the limit of no selfing ( $F = 0$ ) this boost reduces to the diploid outcrossing result:

$$\frac{1+F}{2(F+h-Fh)s} /. \{F \rightarrow 0\}$$

$$\frac{1}{2hs}$$

With complete selfing the result reduces to  $1/s$ :

$$\frac{1 + F}{2 (F + h - F h) s} /. \{F \rightarrow 1\}$$

$$\frac{1}{s}$$

Furthermore for additive dominance, the accelerative effect equals  $1/s$  for all  $F$  values, which is the 'establishment frequency' obtained by Desai and Fisher (2007). Beneficial alleles spread deterministically once above this frequency in their haploid model.

$$\frac{1 + F}{2 (F + h - F h) s} /. \left\{h \rightarrow \frac{1}{2}\right\} // \text{FullSimplify}$$

$$\frac{1}{s}$$

### Consistency with Martin and Lambert (2015)

Martin and Lambert (2015 Theor. Pop. Biol.) used a Feller diffusion to demonstrate that a selective sweep the originated in  $n$  copies has an effective starting frequency drawn from a Gamma distribution with shape parameter  $n$  and scale parameter  $1/[2N(1 - e^{-2N_e s(h+F-hF)/N})]$ , or  $1/[2N(1 - e^{-2s(h+F-hF)/(1+F)})]$  if assuming  $N_e = \frac{N}{1+F}$ .

The mean of such a distribution is the product of the shape and scale parameters, i.e.

$1/[2N(1 - e^{-2s(h+F-hF)/(1+F)})]$ . This value is approximately  $(1/2Nx)$  for  $x = \frac{2(F+h-Fh)s}{1+F}$  if  $s \ll 1$  (see code below). Hence their results are consistent with the above results, where the deterministic starting frequency is elevated by a factor  $\frac{1+F}{2(F+h-Fh)s}$ .

$$\text{Series}\left[\frac{1}{2N\left(1 - \text{Exp}\left[-\frac{2(F+h-Fh)s}{1+F}\right]\right)}, \{s, 0, -1\}\right]$$

$$\frac{1 + F}{4 (F + h - F h) N s} + O[s]^0$$

### Example plot of boost

$$\text{Boostp0}[Na\_ , s\_ , h\_ , F\_ ] := \frac{1 + F}{4 Na s (F + h - F h)}$$

Red, black, blue lines are boosting values for  $h = 0.1, 0.5, 0.9$  respectively, plotted below as a function of  $F$ . The effect is strongest for recessive mutants in outcrossers.

```

BoostPlot = Legended[Plot[{Boostp0[5000, 0.05, 0.1, F],
  Boostp0[5000, 0.05, 0.5, F], Boostp0[5000, 0.05, 0.9, F]}, {F, 0, 1},
  PlotStyle -> {{Red, Thick}, {Black, Thick}, {Blue, Thick}}, FrameLabel ->
  {"Inbreeding coefficient, F", "Effective\nStarting\nFrequency,\np_{0,A}"},
  Frame -> True, Axes -> True, RotateLabel -> {False, True},
  LabelStyle -> {FontFamily -> "Arial", FontSize -> 20, FontColor -> Black},
  PlotRange -> {Automatic, {-0.0005, 0.0105}}, GridLines -> {None, {1/10000}},
  GridLinesStyle -> {Thick, Dashed}, ImageSize -> 750],
  LineLegend[{Directive[{Red, Thick}], Directive[{Black, Thick}],
  Directive[{Blue, Thick}], Directive[{Black, Dashed, Thick}]}],
  {"p_{0,A}, h = 0.1", "p_{0,A}, h = 0.5", "p_{0,A}, h = 0.9", "1/2N"},
  LabelStyle -> {FontSize -> 20}]]

```

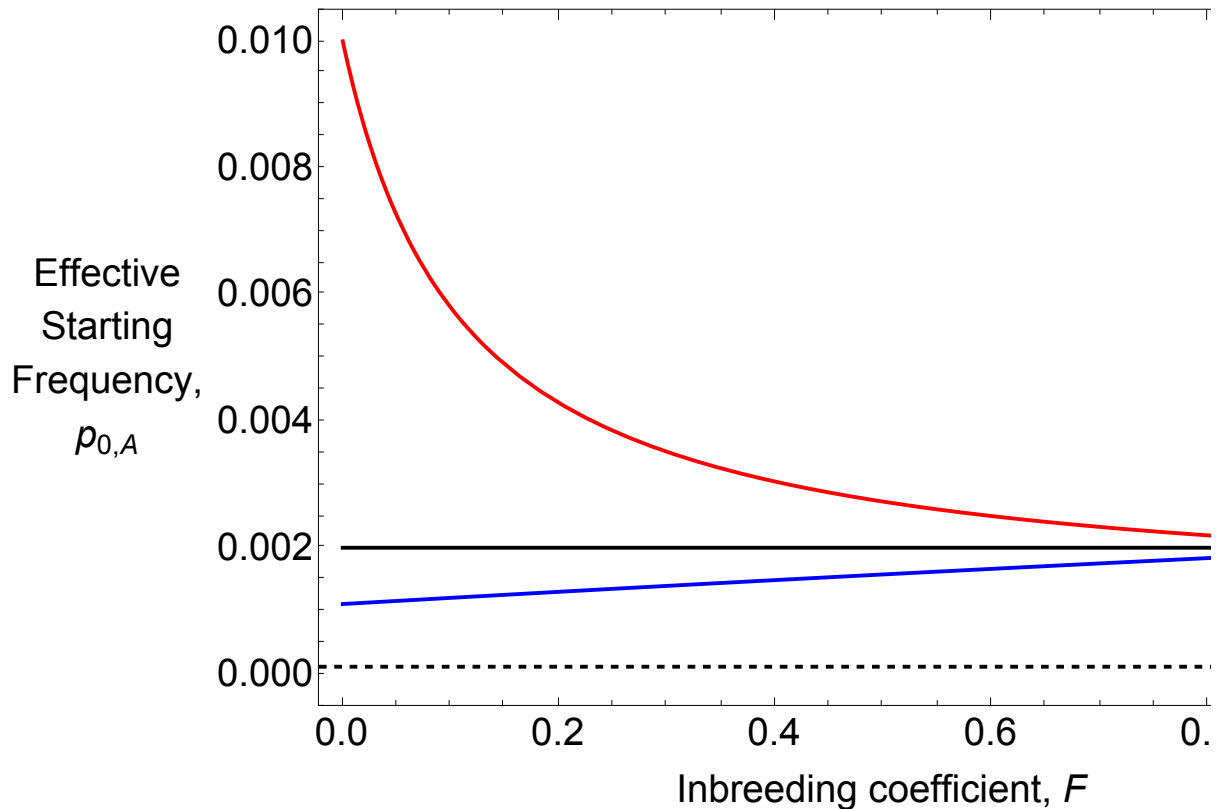

## Section C: Simulation comparisons, $\mathbb{E}[\pi_{SV}/\pi_0]$ and allele trajectory plots

### Equations

Here are the equations for  $F$ ,  $\Phi$  at steady state, as a function of the self-fertilisation fraction and recombination probability:

$$F[\sigma] := \frac{\sigma}{2 - \sigma}$$

$$\Phi[r, \sigma] := \frac{\sigma (2 - \sigma - 2 (1 - r) r (2 - 3 \sigma))}{(2 - \sigma) (2 - (1 - 2 (1 - r) r) \sigma)}$$

Below are the 'star-like' approximation results.

$$\text{PWR2B}[Na, s, h, \sigma, R, p0] :=$$

$$\left( 1 - \left( \frac{1}{1 + \frac{2R}{1+F[\sigma]} (1 - F[\sigma]) p0 (1 - p0)} \right) \left( \left( \frac{(F[\sigma] + h - F[\sigma] h)}{(1 - h + F[\sigma] h)} \left( \frac{1}{p0} + 1 \right) - 1 \right)^{-\frac{R (1 - F[\sigma])}{Na (F[\sigma] + h - F[\sigma] h) s}} \right) \right)$$

The following is the 'effective' starting frequency of a beneficial allele at initial frequency  $\frac{1}{2Na}$ , given that it goes to fixation:

$$\text{Boostp0}[Na, s, h, \sigma] := \frac{1 + F[\sigma]}{4 Na s (F[\sigma] + h - F[\sigma] h)}$$

Below are the equations for the solution that accounts for coalescence in the sweep phase:

$$\text{SweepIntFH}[Na, s, h, F, \Phi, r, p] :=$$

$$\begin{aligned} & - \frac{1}{2 Na s} \left( - \frac{1 + F}{(F + h - F h) p} - \frac{(1 + F) \text{Log}[1 - p]}{1 + (-1 + F) h} + ((-1 + F + F^2 (2 - 8 Na r + h (-3 + 8 Na r))) + \right. \\ & \quad \left. h (3 + 4 Na r (1 + \Phi)) - 4 F Na r (-1 - \Phi + h (3 + \Phi))) \text{Log}[p] \right) / (F + h - F h)^2 - \\ & \quad \frac{1}{(1 + (-1 + F) h) (F + h - F h)^2} (-1 + F^3 (-1 + h (4 - 8 Na r) + h^2 (-4 + 8 Na r)) + \\ & \quad 4 h (1 + Na r (1 + \Phi)) - 4 h^2 (1 + Na r (1 + \Phi)) + \\ & \quad F (1 + 4 Na r (1 + \Phi) - 4 h (1 + 2 Na r (2 + \Phi)) + 4 h^2 (1 + 2 Na r (2 + \Phi))) + \\ & \quad F^2 (1 - 8 Na r + 4 h (-1 + Na r (5 + \Phi)) - 4 h^2 (-1 + Na r (5 + \Phi))) \Big) \\ & \quad \text{Log}[F + h + p - F p - 2 h p + F h (-1 + 2 p)] \Big) \end{aligned}$$

$$\text{PRecPFH}[Na, s, h, F, \Phi, r, p] := (2 r (1 - 2 F + \Phi) (1 - p))$$

$$\text{Exp}[-(\text{SweepIntFH}[Na, s, h, F, \Phi, r, p] -$$

$$\text{SweepIntFH}[Na, s, h, F, \Phi, r, 1 - \text{Boostp0}[Na, s, 1 - h, F]])]$$

$$\text{PRecFHp0}[Na, s, h, F, \Phi, r, p0] := \text{NIntegrate}[\text{PRecPFH}[Na, s, h, F, \Phi, r, p] / (s (1 - p) p (F + h - F h + (1 - F) (1 - 2 h) p)), \{p, p0, 1 - \text{Boostp0}[Na, s, 1 - h, F]\}]$$

$$\text{PNoActFH}[Na, s, h, F, \Phi, r, p0] := \text{Exp}[-(\text{SweepIntFH}[Na, s, h, F, \Phi, r, p0] - \text{SweepIntFH}[Na, s, h, F, \Phi, r, 1 - \text{Boostp0}[Na, s, 1 - h, F]])]$$

$$\text{PRecp0FH}[Na, s, h, F, \Phi, r, p0] := \text{PNoActFH}[Na, s, h, F, \Phi, r, p0] *$$

$$\left( \frac{4 Na r (1 - 2 F + \Phi) (1 - p0) p0}{1 + F + 4 Na r (1 - 2 F + \Phi) (1 - p0) p0} \right)$$

Here's the equation for  $E[\pi/\pi_0]$ , note it is a function of  $\sigma$  rather than  $F$  or  $\Phi$

$$\text{ExpISV}[Na, s, h, \sigma, r, p0] :=$$

$$\text{PRecp0FH}[Na, s, h, F[\sigma], \Phi[r, \sigma], r, p0] + \text{PRecFHp0}[Na, s, h, F[\sigma], \Phi[r, \sigma], r, p0]$$

## Outcrossing case ( $\sigma = F = 0$ )

### Simulation comparisons, from initial frequency $p_0 = 1/2 N$

Loading Data

```
SetDirectory[NotebookDirectory[]];
```

```
Rin = Table[6 + 12 * i, {i, 0, 9}];
```

```
h = 0.5
```

SLiM simulation data

```
PiRelh05 = Import["SLiM_F0/StatsProc_R_120_h_0.5_self_0_f_1e-04_10b_SLiM.dat",
  "Table"][[10]];
PiRelh05CIB = Import[
```

```
  "SLiM_F0/StatsProc_R_120_h_0.5_self_0_f_1e-04_10b_SLiM.dat",
  "Table"][[11]];
PiRelh05CIT = Import[
```

```
  "SLiM_F0/StatsProc_R_120_h_0.5_self_0_f_1e-04_10b_SLiM.dat",
  "Table"][[12]];
PiRelh05S = Partition[Riffle[Partition[Riffle[Rin, PiRelh05], 2],
```

```
  Map[ErrorBar, Partition[Riffle[-PiRelh05CIB, PiRelh05CIT], 2]]], 2];
```

MSMS simulation data (Note that throughout, the 'R' file index value is twice that for SLiM. This is because MSMS uses a scaling of  $4N_r$ , while custom SLiM code uses a scaling of  $2N_r$ ).

```
PiRelh05MSMS =
```

```
  Import["MSMS_SV_5K/StatsProc_R_240_h_0.5_self_0_f_1e-04_10b_MSMS.dat",
    "Table"][[10]];
PiRelh05MSMSCIB = Import[
```

```
  "MSMS_SV_5K/StatsProc_R_240_h_0.5_self_0_f_1e-04_10b_MSMS.dat",
  "Table"][[11]];
PiRelh05MSMSCIT = Import[
```

```
  "MSMS_SV_5K/StatsProc_R_240_h_0.5_self_0_f_1e-04_10b_MSMS.dat",
  "Table"][[12]];
PiRelh05MSMS = Partition[Riffle[Partition[Riffle[Rin, PiRelh05MSMS], 2],
```

```
  Map[ErrorBar, Partition[Riffle[-PiRelh05MSMSCIB, PiRelh05MSMSCIT], 2]]], 2];
```

Analytical results;

From here on we use both the star-like results and the coalescence-in-sweep-phase results. Note that for the latter the input is unscaled recombination probability, so it has to be divided by  $2N = 10,000$  for these parameters. Unless stated otherwise, the x-axis is the scaled recombination rate  $2N_r$ ; the y-axis is  $E[\pi/\pi_0]$ . Axes labels will be added at the end when plots are grouped together.



```
Ph05 = Plot[{{PWR2B[5000, 0.05, 0.5, 0, R, Boostp0[5000, 0.05, 0.5, 0]],
  ExPiSV[5000, 0.05, 0.5, 0,  $\frac{R}{10\,000}$ , Boostp0[5000, 0.05, 0.5, 0]]}},
  {R, 0, 120}, PlotStyle -> {{Black, Thick, Dashed}, {Black, Thick}},
  PlotRange -> All, Frame -> {{True, False}, {True, False}},
  BaseStyle -> {FontWeight -> "Bold", FontColor -> Black, FontSize -> 12}]
```

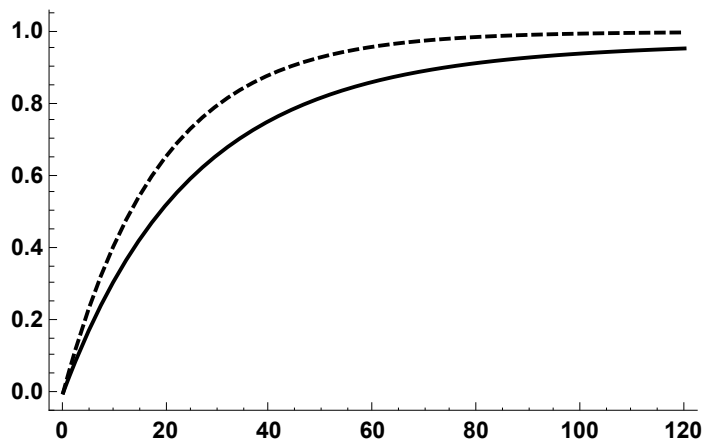

```
Ph05A = Plot[{{ExPiSV[5000, 0.05, 0.5, 0,  $\frac{R}{10\,000}$ , Boostp0[5000, 0.05, 0.5, 0]]}},
  {R, 0, 120}, PlotStyle -> {{Black, Thick}},
  PlotRange -> {All, {0, 1.1}}, Frame -> {{True, False}, {True, False}},
  BaseStyle -> {FontWeight -> "Bold", FontColor -> Black, FontSize -> 12}];
```

Plot of SLiM simulation data

```
Ph05S = ErrorListPlot[PiRelh05S,
  PlotStyle -> {Black, PointSize[0.02]}, PlotRange -> {{0, 120}, {0, 1.1}}]
```

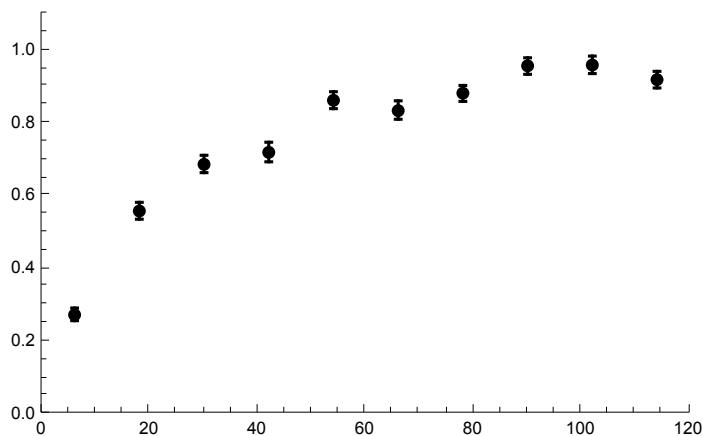

Plot of MSMS simulation data

```
Ph05MSMSS = ErrorListPlot[PiRelh05MSMSS,
  PlotStyle -> {Gray, PointSize[0.02]}, PlotRange -> {{0, 120}, {0, 1.1}}]
```

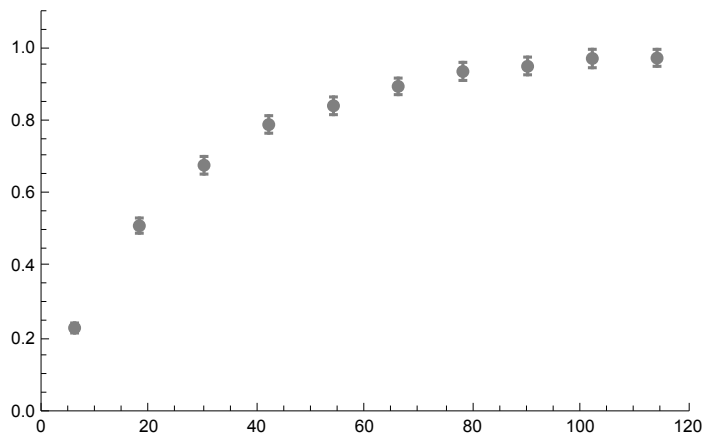

Analytical solutions against both simulation data

```
h05MSMS = Show[Ph05, Ph05S, Ph05MSMSS, ImageSize -> 250]
```

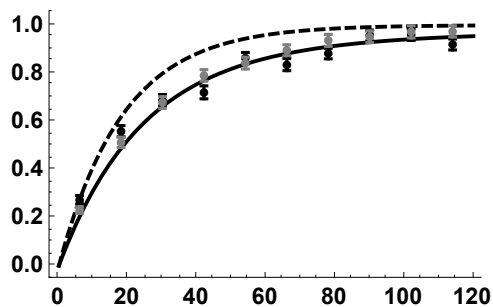

$h = 0.1$

SLiM simulation data

```
PiRelh01 = Import["SLiM_F0/StatsProc_R_120_h_0.1_self_0_f_1e-04_10b_SLiM.dat",
  "Table"][[10]];
PiRelh01CIB = Import[
  "SLiM_F0/StatsProc_R_120_h_0.1_self_0_f_1e-04_10b_SLiM.dat",
  "Table"][[11]];
PiRelh01CIT = Import[
  "SLiM_F0/StatsProc_R_120_h_0.1_self_0_f_1e-04_10b_SLiM.dat",
  "Table"][[12]];
PiRelh01S = Partition[Riffle[Partition[Riffle[Rin, PiRelh01], 2],
  Map[ErrorBar, Partition[Riffle[-PiRelh01CIB, PiRelh01CIT], 2]]], 2];
```

MSMS simulation data

```

PiRelh01MSMS =
  Import["MSMS_SV_5K/StatsProc_R_240_h_0.1_self_0_f_1e-04_10b_MSMS.dat",
    "Table"][[10]];
PiRelh01MSMSCIB = Import[
  "MSMS_SV_5K/StatsProc_R_240_h_0.1_self_0_f_1e-04_10b_MSMS.dat",
  "Table"][[11]];
PiRelh01MSMSCIT = Import[
  "MSMS_SV_5K/StatsProc_R_240_h_0.1_self_0_f_1e-04_10b_MSMS.dat",
  "Table"][[12]];
PiRelh01MSMSS = Partition[Riffle[Partition[Riffle[Rin, PiRelh01MSMS], 2],
  Map[ErrorBar, Partition[Riffle[-PiRelh01MSMSCIB, PiRelh01MSMSCIT], 2]], 2];

```

Analytical results

```

Ph01 = Plot[{PWR2B[5000, 0.05, 0.1, 0, R, Boostp0[5000, 0.05, 0.1, 0]],
  ExpISV[5000, 0.05, 0.1, 0,  $\frac{R}{10\,000}$ , Boostp0[5000, 0.05, 0.1, 0]]},
  {R, 0, 120}, PlotStyle → {{Red, Thick, Dashed}, {Red, Thick}},
  PlotRange → All, Frame → {{True, False}, {True, False}},
  BaseStyle → {FontWeight → "Bold", FontColor → Black, FontSize → 12}]

```

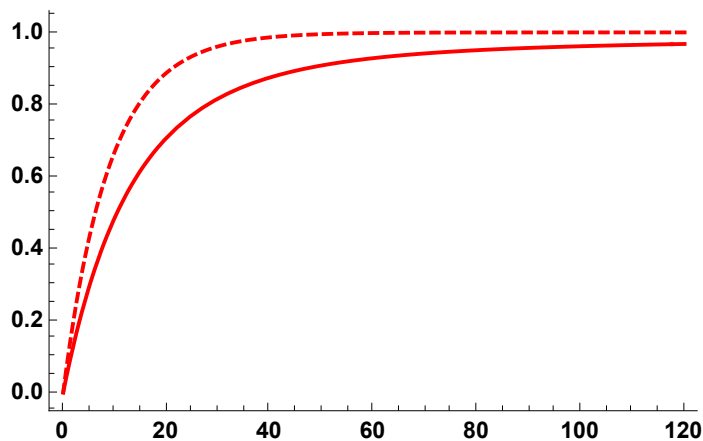

```

Ph01A = Plot[{ExpISV[5000, 0.05, 0.1, 0,  $\frac{R}{10\,000}$ , Boostp0[5000, 0.05, 0.1, 0]]},
  {R, 0, 120}, PlotStyle → {{Red, Thick}},
  PlotRange → All, Frame → {{True, False}, {True, False}},
  BaseStyle → {FontWeight → "Bold", FontColor → Black, FontSize → 12}];

```

SLiM simulation data

```
Ph01S = ErrorListPlot[PiRelh01S,
  PlotStyle → {Red, PointSize[0.02]}, PlotRange → {{0, 120}, {0, 1.1}}]
```

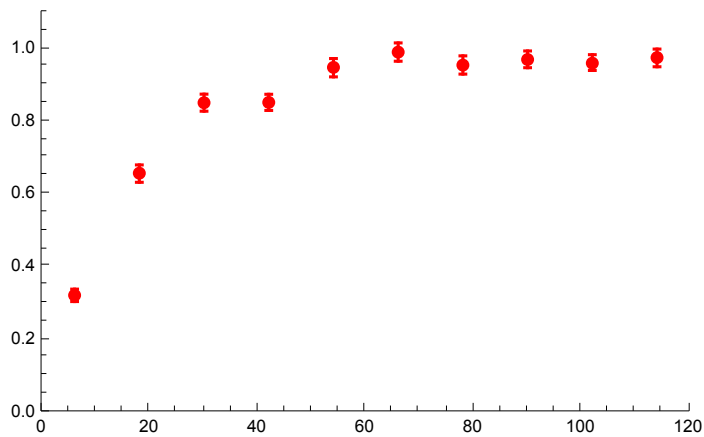

MSMS simulation data

```
Ph01MSMSS = ErrorListPlot[PiRelh01MSMSS,
  PlotStyle → {Pink, PointSize[0.02]}, PlotRange → {{0, 120}, {0, 1.1}}]
```

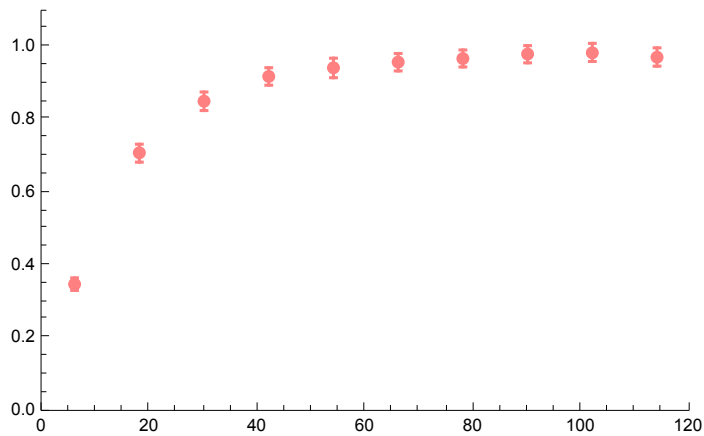

Analytical solutions against both types of simulation data

```
h01MSMS = Show[Ph01, Ph01S, Ph01MSMSS, ImageSize → 250]
```

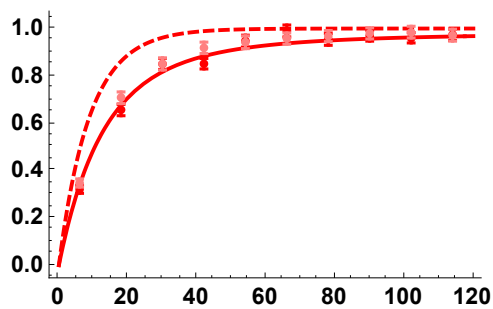

$h = 0.9$

SLiM simulation data

```

PiRelh09 = Import["SLIM_F0/StatsProc_R_120_h_0.9_self_0_f_1e-04_10b_SLIM.dat",
  "Table"][[10]];
PiRelh09CIB = Import[
  "SLIM_F0/StatsProc_R_120_h_0.9_self_0_f_1e-04_10b_SLIM.dat",
  "Table"][[11]];
PiRelh09CIT = Import[
  "SLIM_F0/StatsProc_R_120_h_0.9_self_0_f_1e-04_10b_SLIM.dat",
  "Table"][[12]];
PiRelh09S = Partition[Riffle[Partition[Riffle[Rin, PiRelh09], 2],
  Map[ErrorBar, Partition[Riffle[-PiRelh09CIB, PiRelh09CIT], 2]]], 2];
MSMS simulation data
PiRelh09MSMS =
  Import["MSMS_SV_5K/StatsProc_R_240_h_0.9_self_0_f_1e-04_10b_MSMS.dat",
    "Table"][[10]];
PiRelh09MSMSCIB = Import[
  "MSMS_SV_5K/StatsProc_R_240_h_0.9_self_0_f_1e-04_10b_MSMS.dat",
  "Table"][[11]];
PiRelh09MSMSCIT = Import[
  "MSMS_SV_5K/StatsProc_R_240_h_0.9_self_0_f_1e-04_10b_MSMS.dat",
  "Table"][[12]];
PiRelh09MSMSS = Partition[Riffle[Partition[Riffle[Rin, PiRelh09MSMS], 2],
  Map[ErrorBar, Partition[Riffle[-PiRelh09MSMSCIB, PiRelh09MSMSCIT], 2]]], 2];
Analytical results
Ph09 = Plot[{{PWR2B[5000, 0.05, 0.9, 0, R, Boostp0[5000, 0.05, 0.9, 0]],
  ExPiSV[5000, 0.05, 0.9, 0,  $\frac{R}{10\,000}$ , Boostp0[5000, 0.05, 0.9, 0]]}},
  {R, 0, 120}, PlotStyle → {{Blue, Thick, Dashed}, {Blue, Thick}},
  PlotRange → All, Frame → {{True, False}, {True, False}},
  BaseStyle → {FontWeight → "Bold", FontColor → Black, FontSize → 12}]

```

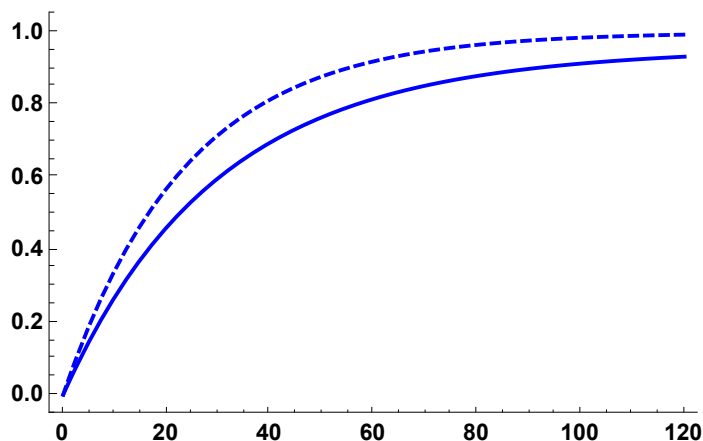

```
Ph09A = Plot[{{ExpISV[5000, 0.05, 0.9, 0,  $\frac{R}{10000}$ , Boostp0[5000, 0.05, 0.9, 0]]},
  {R, 0, 120}, PlotStyle -> {{Blue, Thick}}, PlotRange -> All,
  Frame -> {{True, False}, {True, False}}, FrameLabel ->
  {{ $\pi/\pi_0$ , None}, {"Recombination Rate, 2Nr", None}}, RotateLabel -> False];
```

Plot of SLiM simulation data

```
Ph09S = ErrorListPlot[PiRelh09S,
  PlotStyle -> {Blue, PointSize[0.02]}, PlotRange -> {{0, 120}, {0, 1.1}}]
```

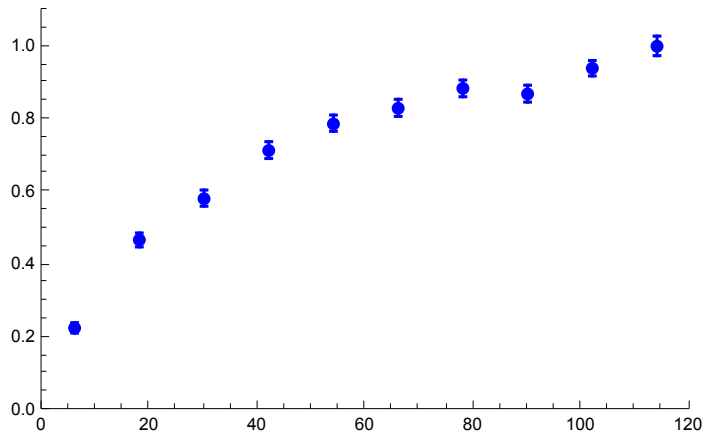

Plot of MSMS simulation data

```
Ph09MSMSS = ErrorListPlot[PiRelh09MSMSS,
  PlotStyle -> {Cyan, PointSize[0.02]}, PlotRange -> {{0, 120}, {0, 1.1}}]
```

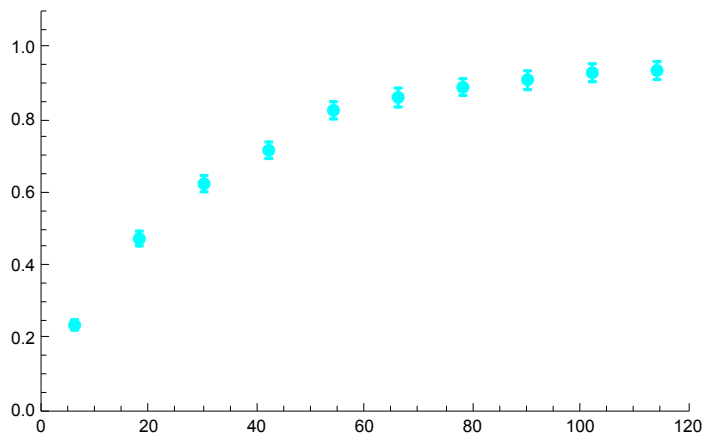

Analytical solutions against both types of simulation data

```
h09MSMS = Show[Ph09, Ph09S, Ph09MSMSS, ImageSize -> 250]
```

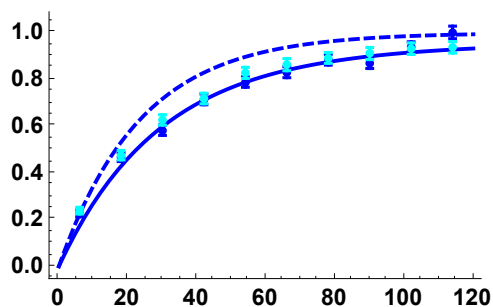

All  $h$  values, using the coalescence-in-sweep-phase results and SLiM simulations:

```
Sims0DN = Show[Ph01A, Ph01S, Ph05A, Ph05S, Ph09A, Ph09S, ImageSize → 250]
```

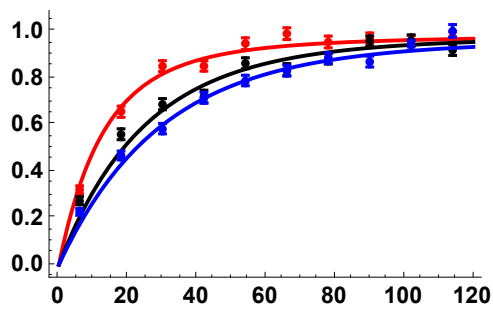

All  $h$  values, comparing star-like approximation with coalescence-in-sweep-phase results:

```
Sims0DN2 = Show[Ph01, Ph05, Ph09, ImageSize → 250]
```

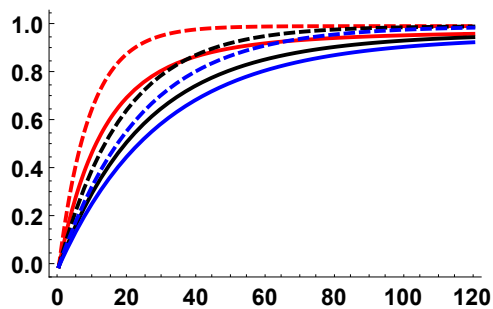

## Simulation comparisons, $p_0 = 0.02$

Loading Data

```
SetDirectory[NotebookDirectory[]];
```

```
Rin = Table[6 + 12 * i, {i, 0, 9}];
```

```
h = 0.5
```

SLiM simulation results

```
PiRelh05p002 =
```

```
  Import["SLiM_F0/StatsProc_R_120_h_0.5_self_0_f_0.02_10b_SLiM.dat", "Table"][[10]];
```

```
PiRelh05p002CIB = Import[
```

```
  "SLiM_F0/StatsProc_R_120_h_0.5_self_0_f_0.02_10b_SLiM.dat",
  "Table"][[11]];
```

```
PiRelh05p002CIT = Import[
```

```
  "SLiM_F0/StatsProc_R_120_h_0.5_self_0_f_0.02_10b_SLiM.dat",
  "Table"][[12]];
```

```
PiRelh05p002S = Partition[Riffle[Partition[Riffle[Rin, PiRelh05p002], 2],
```

```
  Map[ErrorBar, Partition[Riffle[-PiRelh05p002CIB, PiRelh05p002CIT], 2]]], 2];
```

MSMS simulation results

```

PiRelh05p002MSMS =
  Import["MSMS_SV_5K/StatsProc_R_240_h_0.5_self_0_f_0.02_10b_MSMS.dat",
    "Table"][[10]];
PiRelh05p002MSMSCIB = Import[
  "MSMS_SV_5K/StatsProc_R_240_h_0.5_self_0_f_0.02_10b_MSMS.dat",
  "Table"][[11]];
PiRelh05p002MSMSCIT = Import[
  "MSMS_SV_5K/StatsProc_R_240_h_0.5_self_0_f_0.02_10b_MSMS.dat",
  "Table"][[12]];
PiRelh05p002MSMSS = Partition[Riffle[
  Partition[Riffle[Rin, PiRelh05p002MSMS], 2], Map[ErrorBar,
    Partition[Riffle[-PiRelh05p002MSMSCIB, PiRelh05p002MSMSCIT], 2]]], 2];

```

Analytical results

```

Ph05p002 = Plot[
  {PWR2B[5000, 0.05, 0.5, 0, R, 0.02], ExPiSV[5000, 0.05, 0.5, 0,  $\frac{R}{10000}$ , 0.02]}],
  {R, 0, 120}, PlotStyle → {{Black, Thick, Dashed}, {Black, Thick}},
  PlotRange → All, Frame → {{True, False}, {True, False}},
  BaseStyle → {FontWeight → "Bold", FontColor → Black, FontSize → 12}
]

```

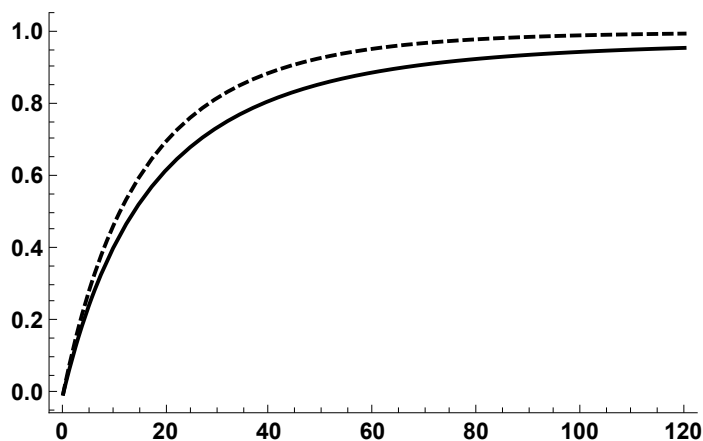

```

Ph05p002A = Plot[{ExPiSV[5000, 0.05, 0.5, 0,  $\frac{R}{10000}$ , 0.02]}],
  {R, 0, 120}, PlotStyle → {{Black, Thick}},
  PlotRange → All, Frame → {{True, False}, {True, False}},
  BaseStyle → {FontWeight → "Bold", FontColor → Black, FontSize → 12}];

```

SLiM simulation res plot



```
Ph05p002S = ErrorListPlot[PiRelh05p002S,
  PlotStyle -> {Black, PointSize[0.02]}, PlotRange -> {{0, 120}, {0, 1.1}}]
```

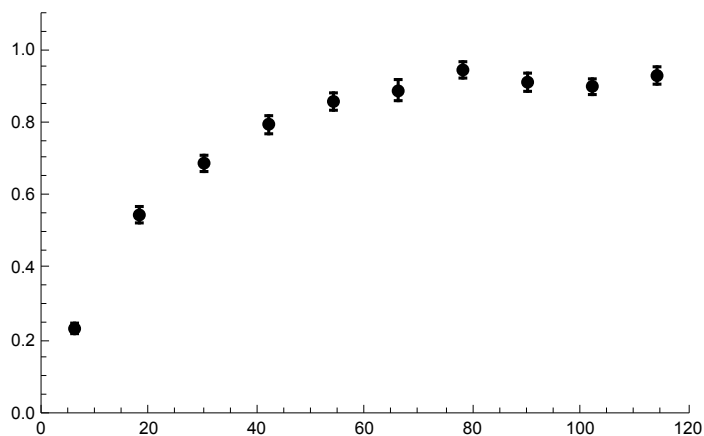

MSMS simulation res plot

```
Ph05p002MSMSS = ErrorListPlot[PiRelh05p002MSMSS,
  PlotStyle -> {Gray, PointSize[0.02]}, PlotRange -> {{0, 120}, {0, 1.1}}]
```

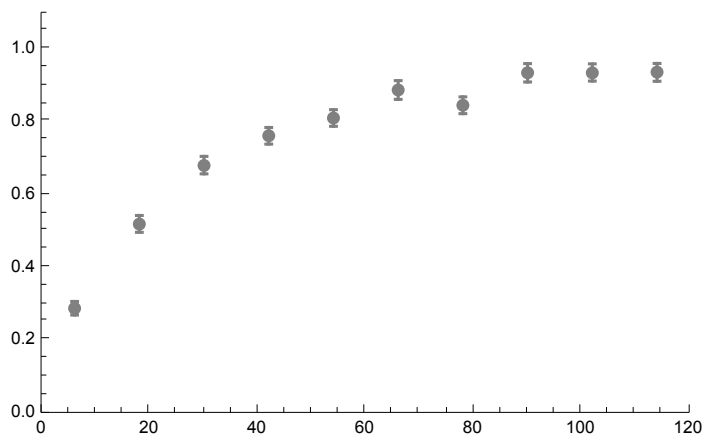

Analytical solutions against both simulation data

```
h05MSMS2pc = Show[Ph05p002, Ph05p002S, Ph05p002MSMSS, ImageSize -> 250]
```

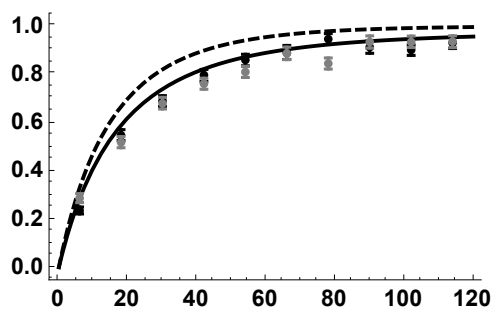

$h = 0.1$

SLiM simulation results

```

PiRelh01p002 =
  Import["SLIM_F0/StatsProc_R_120_h_0.1_self_0_f_0.02_10b_SLIM.dat", "Table"][[
    10]];
PiRelh01p002CIB = Import[
  "SLIM_F0/StatsProc_R_120_h_0.1_self_0_f_0.02_10b_SLIM.dat",
  "Table"][[11]];
PiRelh01p002CIT = Import[
  "SLIM_F0/StatsProc_R_120_h_0.1_self_0_f_0.02_10b_SLIM.dat",
  "Table"][[12]];
PiRelh01p002S = Partition[Riffle[Partition[Riffle[Rin, PiRelh01p002], 2],
  Map[ErrorBar, Partition[Riffle[-PiRelh01p002CIB, PiRelh01p002CIT], 2]]], 2];

```

MSMS simulation results

```

PiRelh01p002MSMS =
  Import["MSMS_SV_5K/StatsProc_R_240_h_0.1_self_0_f_0.02_10b_MSMS.dat",
  "Table"][[10]];
PiRelh01p002MSMSCIB = Import[
  "MSMS_SV_5K/StatsProc_R_240_h_0.1_self_0_f_0.02_10b_MSMS.dat",
  "Table"][[11]];
PiRelh01p002MSMSCIT = Import[
  "MSMS_SV_5K/StatsProc_R_240_h_0.1_self_0_f_0.02_10b_MSMS.dat",
  "Table"][[12]];
PiRelh01p002MSMSS = Partition[Riffle[
  Partition[Riffle[Rin, PiRelh01p002MSMS], 2], Map[ErrorBar,
  Partition[Riffle[-PiRelh01p002MSMSCIB, PiRelh01p002MSMSCIT], 2]]], 2];

```

Analytical results

```

Ph01p002 = Plot[
  {PWR2B[5000, 0.05, 0.1, 0, R, 0.02], ExpISV[5000, 0.05, 0.1, 0,  $\frac{R}{10000}$ , 0.02]},
  {R, 0, 120}, PlotStyle → {{Red, Thick, Dashed}, {Red, Thick}},
  PlotRange → All, Frame → {{True, False}, {True, False}},
  BaseStyle → {FontWeight → "Bold", FontColor → Black, FontSize → 12}
]

```

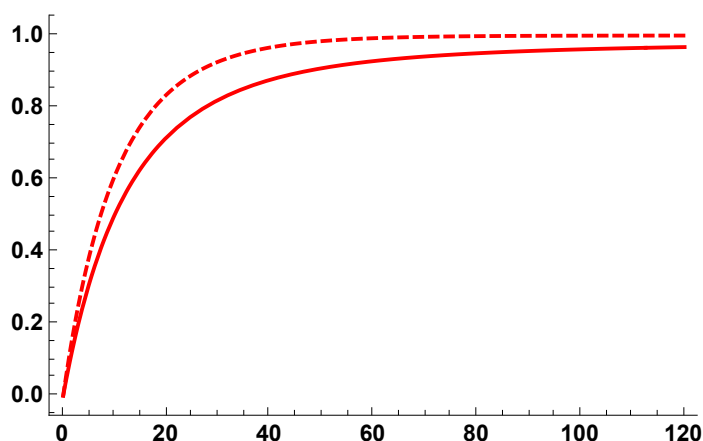

```
Ph01p002A = Plot[{{ExpISV[5000, 0.05, 0.1, 0,  $\frac{R}{10000}$ , 0.02]}},
  {R, 0, 120}, PlotStyle -> {{Red, Thick}},
  PlotRange -> All, Frame -> {{True, False}, {True, False}},
  BaseStyle -> {FontWeight -> "Bold", FontColor -> Black, FontSize -> 12}];
```

SLiM simulation res plot

```
Ph01p002S = ErrorListPlot[PiRelh01p002S,
  PlotStyle -> {Red, PointSize[0.02]}, PlotRange -> {{0, 120}, {0, 1.1}}]
```

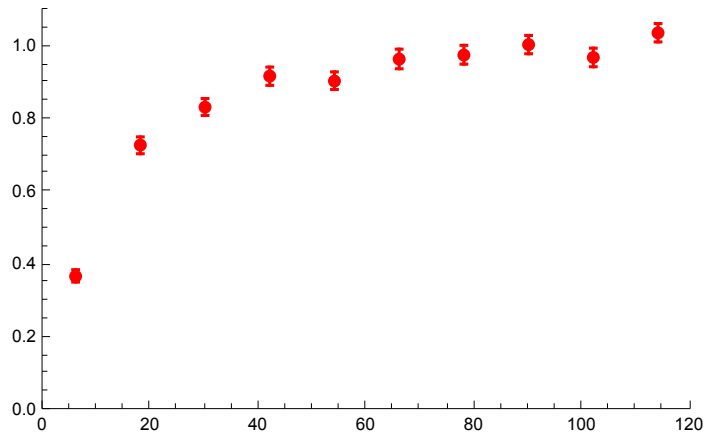

MSMS simulation res plot

```
Ph01p002MSMSS = ErrorListPlot[PiRelh01p002MSMSS,
  PlotStyle -> {Pink, PointSize[0.02]}, PlotRange -> {{0, 120}, {0, 1.1}}]
```

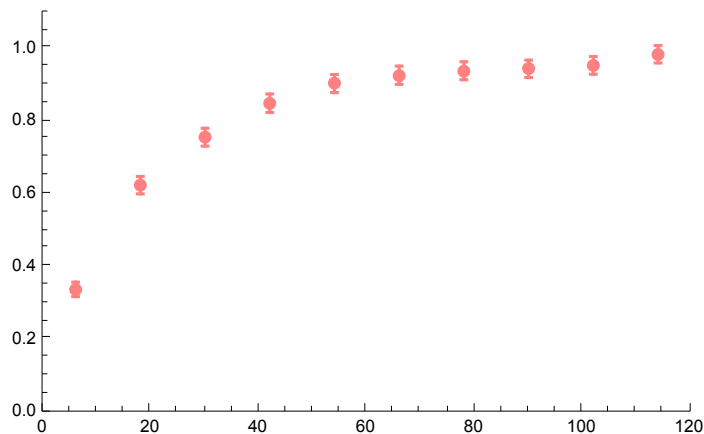

Analytical solutions against both simulation data

```
h01MSMS2pc = Show[Ph01p002, Ph01p002S, Ph01p002MSMSS, ImageSize -> 250]
```

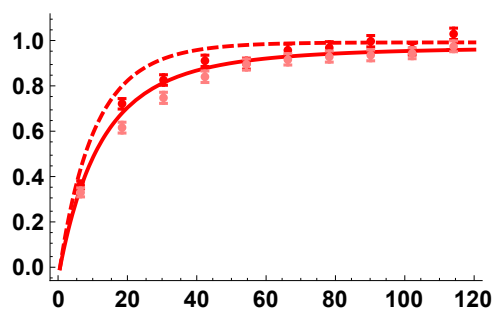

h = 0.9

SLiM simulation results

```
PiRelh09p002 =
  Import["SLiM_F0/StatsProc_R_120_h_0.9_self_0_f_0.02_10b_SLiM.dat", "Table"][[
    10]];
PiRelh09p002CIB = Import[
  "SLiM_F0/StatsProc_R_120_h_0.9_self_0_f_0.02_10b_SLiM.dat",
  "Table"][[11]];
PiRelh09p002CIT = Import[
  "SLiM_F0/StatsProc_R_120_h_0.9_self_0_f_0.02_10b_SLiM.dat",
  "Table"][[12]];
PiRelh09p002S = Partition[Riffle[Partition[Riffle[Rin, PiRelh09p002], 2],
  Map[ErrorBar, Partition[Riffle[-PiRelh09p002CIB, PiRelh09p002CIT], 2]]], 2];
```

MSMS simulation results

```
PiRelh09p002MSMS =
  Import["MSMS_SV_5K/StatsProc_R_240_h_0.9_self_0_f_0.02_10b_MSMS.dat",
  "Table"][[10]];
PiRelh09p002MSMSCIB = Import[
  "MSMS_SV_5K/StatsProc_R_240_h_0.9_self_0_f_0.02_10b_MSMS.dat",
  "Table"][[11]];
PiRelh09p002MSMSCIT = Import[
  "MSMS_SV_5K/StatsProc_R_240_h_0.9_self_0_f_0.02_10b_MSMS.dat",
  "Table"][[12]];
PiRelh09p002MSMSS = Partition[Riffle[
  Partition[Riffle[Rin, PiRelh09p002MSMS], 2], Map[ErrorBar,
  Partition[Riffle[-PiRelh09p002MSMSCIB, PiRelh09p002MSMSCIT], 2]]], 2];
```

Analytical results

```
Ph09p002 = Plot[
  {PWR2B[5000, 0.05, 0.9, 0, R, 0.02], ExpISV[5000, 0.05, 0.9, 0,  $\frac{R}{10\,000}$ , 0.02]},
  {R, 0, 120}, PlotStyle → {{Blue, Thick, Dashed}, {Blue, Thick}},
  PlotRange → All, Frame → {{True, False}, {True, False}},
  BaseStyle → {FontWeight → "Bold", FontColor → Black, FontSize → 12}]
```

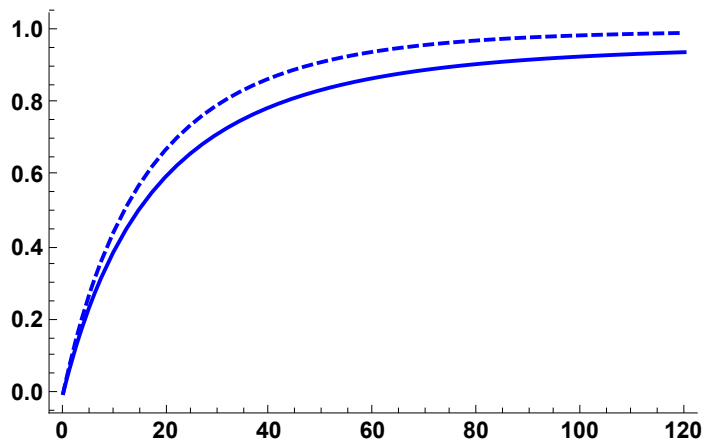

```
Ph09p002A = Plot[{ExpISV[5000, 0.05, 0.9, 0,  $\frac{R}{10\,000}$ , 0.02]},
  {R, 0, 120}, PlotStyle → {{Blue, Thick}},
  PlotRange → All, Frame → {{True, False}, {True, False}},
  BaseStyle → {FontWeight → "Bold", FontColor → Black, FontSize → 12}];
```

SLiM simulation plot

```
Ph09p002S = ErrorListPlot[PiRelh09p002S,
  PlotStyle → {Blue, PointSize[0.02]}, PlotRange → {{0, 120}, {0, 1.1}}]
```

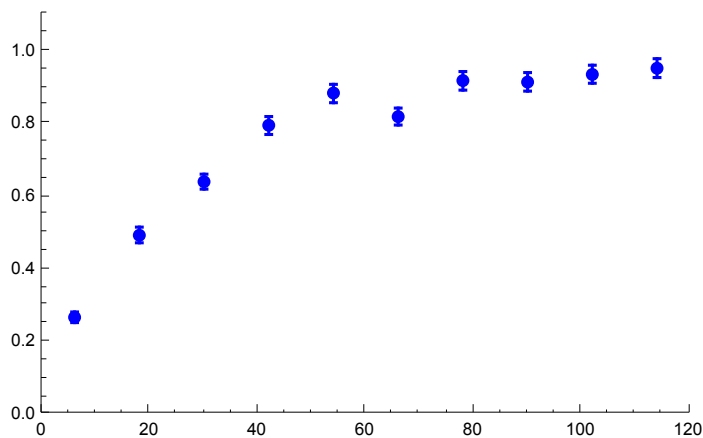

MSMS simulation plot

```
Ph09p002MSMSS = ErrorListPlot[PiRelh09p002MSMSS,
  PlotStyle -> {Cyan, PointSize[0.02]}, PlotRange -> {{0, 120}, {0, 1.1}}]
```

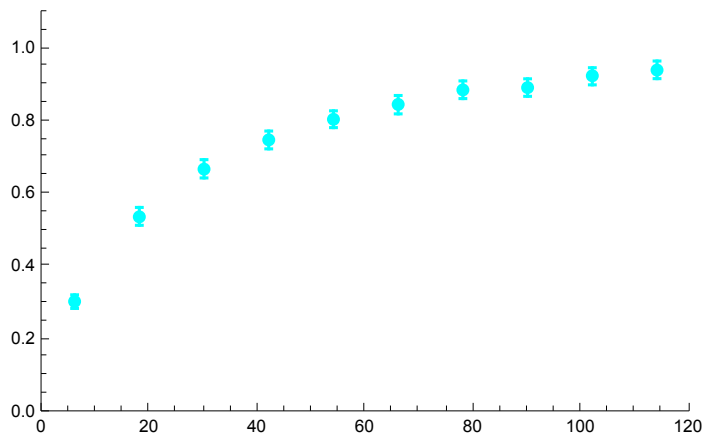

Analytical solutions against both simulation data

```
h09MSMSS2pc = Show[Ph09p002, Ph09p002S, Ph09p002MSMSS, ImageSize -> 250]
```

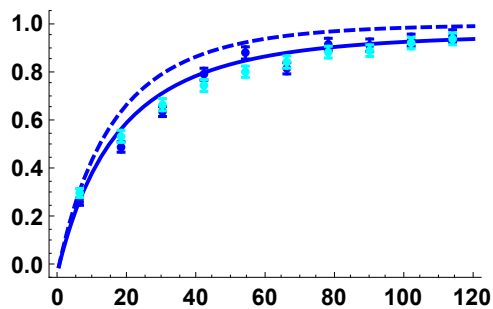

All  $h$  values, using the coalescence-in-sweep-phase results and SLiM simulations:

```
Sims02pc = Show[Ph01p002A, Ph01p002S,
  Ph05p002A, Ph05p002S, Ph09p002A, Ph09p002S, ImageSize -> 250]
```

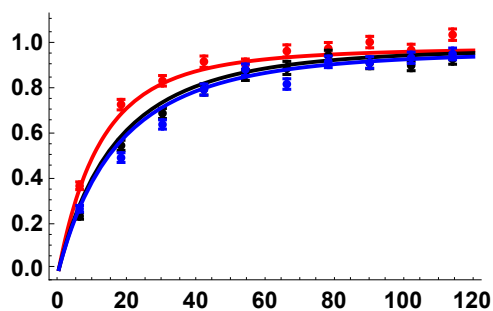

All  $h$  values, comparing star-like approximation with coalescence-in-sweep-phase results:

```
Sims02pc2 = Show[Ph01p002, Ph05p002, Ph09p002, ImageSize → 250]
```

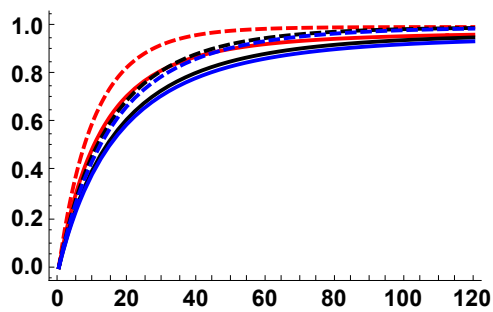

## Simulation comparisons, $p_0 = 0.05$

$h = 0.5$

SLiM sims

```
PiRelh05p005 =
```

```
  Import["SLiM_F0/StatsProc_R_120_h_0.5_self_0_f_0.05_10b_SLiM.dat", "Table"][[10]];
```

```
PiRelh05p005CIB = Import[
```

```
  "SLiM_F0/StatsProc_R_120_h_0.5_self_0_f_0.05_10b_SLiM.dat",
  "Table"][[11]];
```

```
PiRelh05p005CIT = Import[
```

```
  "SLiM_F0/StatsProc_R_120_h_0.5_self_0_f_0.05_10b_SLiM.dat",
  "Table"][[12]];
```

```
PiRelh05p005S = Partition[Riffle[Partition[Riffle[Rin, PiRelh05p005], 2],
```

```
  Map[ErrorBar, Partition[Riffle[-PiRelh05p005CIB, PiRelh05p005CIT], 2]], 2];
```

MSMS Sims

```
PiRelh05p005MSMS =
```

```
  Import["MSMS_SV_5K/StatsProc_R_240_h_0.5_self_0_f_0.05_10b_MSMS.dat",
  "Table"][[10]];
```

```
PiRelh05p005MSMSCIB = Import[
```

```
  "MSMS_SV_5K/StatsProc_R_240_h_0.5_self_0_f_0.05_10b_MSMS.dat",
  "Table"][[11]];
```

```
PiRelh05p005MSMSCIT = Import[
```

```
  "MSMS_SV_5K/StatsProc_R_240_h_0.5_self_0_f_0.05_10b_MSMS.dat",
  "Table"][[12]];
```

```
PiRelh05p005MSMS = Partition[Riffle[
```

```
  Partition[Riffle[Rin, PiRelh05p005MSMS], 2], Map[ErrorBar,
  Partition[Riffle[-PiRelh05p005MSMSCIB, PiRelh05p005MSMSCIT], 2]], 2];
```

Analytical solutions

```
Ph05p005 = Plot[
  {PWR2B[5000, 0.05, 0.5, 0, R, 0.05], ExPiSV[5000, 0.05, 0.5, 0,  $\frac{R}{10\,000}$ , 0.05]},
  {R, 0, 120}, PlotStyle → {{Black, Thick, Dashed}, {Black, Thick}},
  PlotRange → All, Frame → {{True, False}, {True, False}},
  BaseStyle → {FontWeight → "Bold", FontColor → Black, FontSize → 12}]
```

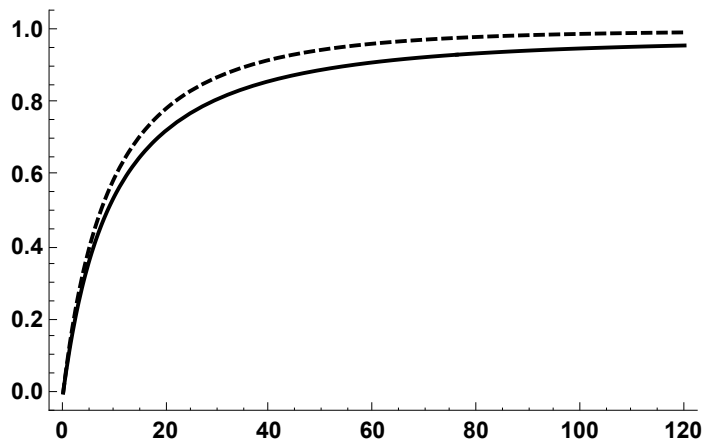

```
Ph05p005A = Plot[{ExPiSV[5000, 0.05, 0.5, 0,  $\frac{R}{10\,000}$ , 0.05]},
  {R, 0, 120}, PlotStyle → {{Black, Thick}},
  PlotRange → All, Frame → {{True, False}, {True, False}},
  BaseStyle → {FontWeight → "Bold", FontColor → Black, FontSize → 12}];
```

SLiM sims

```
Ph05p005S = ErrorListPlot[PiRelh05p005S,
  PlotStyle → {Black, PointSize[0.02]}, PlotRange → {{0, 120}, {0, 1.1}}]
```

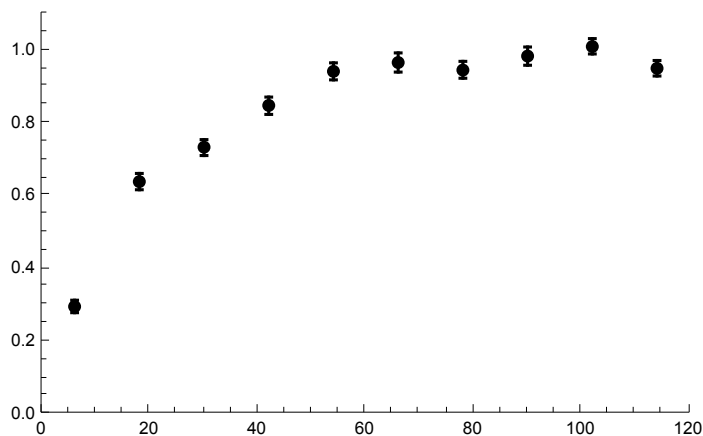

MSMS Sims



```
Ph05p005MSMSS = ErrorListPlot[PiRelh05p005MSMSS,
  PlotStyle -> {Gray, PointSize[0.02]}, PlotRange -> {{0, 120}, {0, 1.1}}]
```

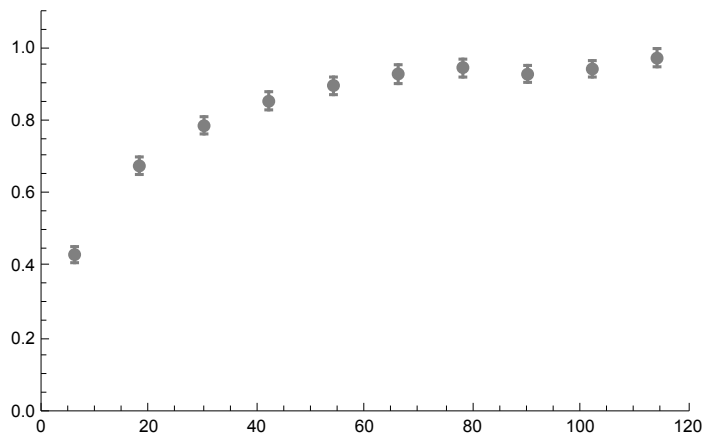

Analytical solutions against both types of simulation data

```
h05MSMSS5pc = Show[Ph05p005, Ph05p005S, Ph05p005MSMSS, ImageSize -> 250]
```

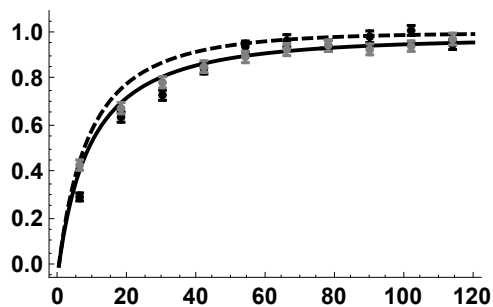

$h = 0.1$

SLiM simulation data

```
PiRelh01p005 =
  Import["SLIM_F0/StatsProc_R_120_h_0.1_self_0_f_0.05_10b_SLIM.dat", "Table"][[
    10]];
PiRelh01p005CIB = Import[
  "SLIM_F0/StatsProc_R_120_h_0.1_self_0_f_0.05_10b_SLIM.dat",
  "Table"][[11]];
PiRelh01p005CIT = Import[
  "SLIM_F0/StatsProc_R_120_h_0.1_self_0_f_0.05_10b_SLIM.dat",
  "Table"][[12]];
PiRelh01p005S = Partition[Riffle[Partition[Riffle[Rin, PiRelh01p005], 2],
  Map[ErrorBar, Partition[Riffle[-PiRelh01p005CIB, PiRelh01p005CIT], 2]], 2];
MSMSS simulation data
```

```

PiRelh01p005MSMS =
  Import["MSMS_SV_5K/StatsProc_R_240_h_0.1_self_0_f_0.05_10b_MSMS.dat",
    "Table"][[10]];
PiRelh01p005MSMSCIB = Import[
  "MSMS_SV_5K/StatsProc_R_240_h_0.1_self_0_f_0.05_10b_MSMS.dat",
  "Table"][[11]];
PiRelh01p005MSMSCIT = Import[
  "MSMS_SV_5K/StatsProc_R_240_h_0.1_self_0_f_0.05_10b_MSMS.dat",
  "Table"][[12]];
PiRelh01p005MSMSS = Partition[Riffle[
  Partition[Riffle[Rin, PiRelh01p005MSMS], 2], Map[ErrorBar,
    Partition[Riffle[-PiRelh01p005MSMSCIB, PiRelh01p005MSMSCIT], 2]]], 2];

```

Analytical results

```

Ph01p005 = Plot[
  {PWR2B[5000, 0.05, 0.1, 0, R, 0.05], ExpISV[5000, 0.05, 0.1, 0,  $\frac{R}{10000}$ , 0.05]}],
  {R, 0, 120}, PlotStyle → {{Red, Thick, Dashed}, {Red, Thick}},
  PlotRange → All, Frame → {{True, False}, {True, False}},
  BaseStyle → {FontWeight → "Bold", FontColor → Black, FontSize → 12}
]

```

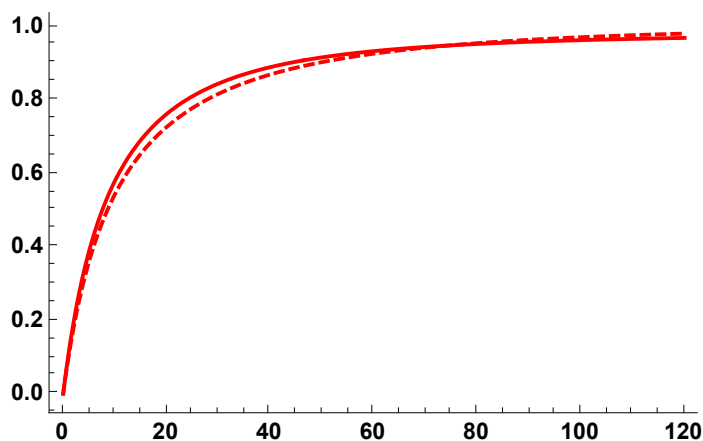

```

Ph01p005A = Plot[{ExpISV[5000, 0.05, 0.1, 0,  $\frac{R}{10000}$ , 0.05]}],
  {R, 0, 120}, PlotStyle → {{Red, Thick}},
  PlotRange → All, Frame → {{True, False}, {True, False}},
  BaseStyle → {FontWeight → "Bold", FontColor → Black, FontSize → 12}
];

```

SLiM simulation data plot

```
Ph01p005S = ErrorListPlot[PiRelh01p005S,
  PlotStyle → {Red, PointSize[0.02]}, PlotRange → {{0, 120}, {0, 1.1}}]
```

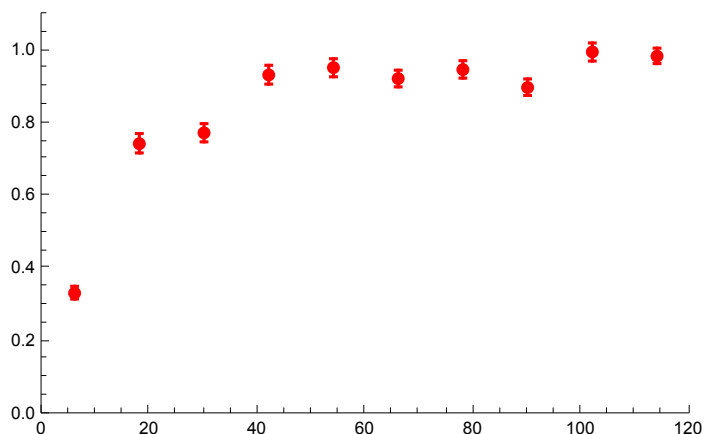

MSMS simulation data plot

```
Ph01p005MSMSS = ErrorListPlot[PiRelh01p005MSMSS,
  PlotStyle → {Pink, PointSize[0.02]}, PlotRange → {{0, 120}, {0, 1.1}}]
```

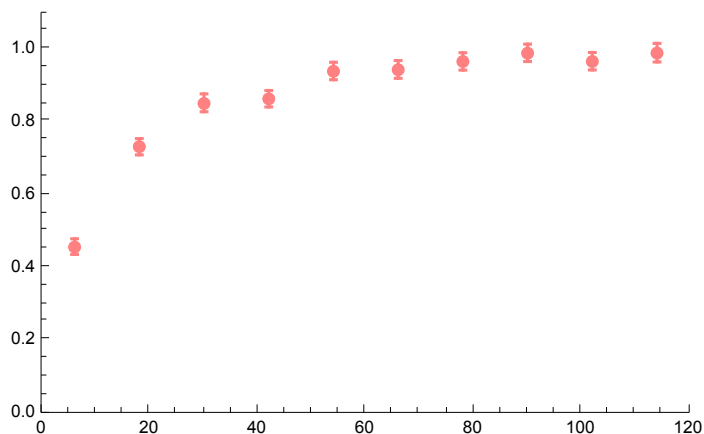

Analytical solutions against both types of simulation data

```
h01MSMS5pc = Show[Ph01p005, Ph01p005S, Ph01p005MSMSS, ImageSize → 250]
```

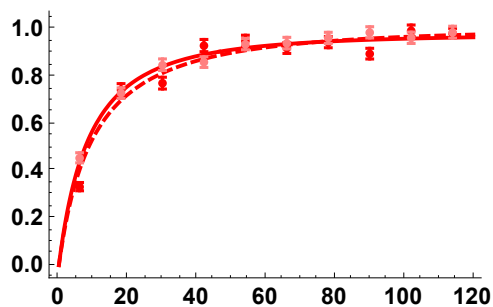

$h = 0.9$

SLiM simulation data

```

PiRelh09p005 =
  Import["SLIM_F0/StatsProc_R_120_h_0.9_self_0_f_0.05_10b_SLIM.dat", "Table"][[
    10]];
PiRelh09p005CIB = Import[
  "SLIM_F0/StatsProc_R_120_h_0.9_self_0_f_0.05_10b_SLIM.dat",
  "Table"][[11]];
PiRelh09p005CIT = Import[
  "SLIM_F0/StatsProc_R_120_h_0.9_self_0_f_0.05_10b_SLIM.dat",
  "Table"][[12]];
PiRelh09p005S = Partition[Riffle[Partition[Riffle[Rin, PiRelh09p005], 2],
  Map[ErrorBar, Partition[Riffle[-PiRelh09p005CIB, PiRelh09p005CIT], 2]]], 2];

```

MSMS simulation data

```

PiRelh09p005MSMS =
  Import["MSMS_SV_5K/StatsProc_R_240_h_0.9_self_0_f_0.05_10b_MSMS.dat",
  "Table"][[10]];
PiRelh09p005MSMSCIB = Import[
  "MSMS_SV_5K/StatsProc_R_240_h_0.9_self_0_f_0.05_10b_MSMS.dat",
  "Table"][[11]];
PiRelh09p005MSMSCIT = Import[
  "MSMS_SV_5K/StatsProc_R_240_h_0.9_self_0_f_0.05_10b_MSMS.dat",
  "Table"][[12]];
PiRelh09p005MSMSS = Partition[Riffle[
  Partition[Riffle[Rin, PiRelh09p005MSMS], 2], Map[ErrorBar,
  Partition[Riffle[-PiRelh09p005MSMSCIB, PiRelh09p005MSMSCIT], 2]]], 2];

```

Analytical solutions

```

Ph09p005 = Plot[
  {PWR2B[5000, 0.05, 0.9, 0, R, 0.05], ExpISV[5000, 0.05, 0.9, 0,  $\frac{R}{10000}$ , 0.05]},
  {R, 0, 120}, PlotStyle → {{Blue, Thick, Dashed}, {Blue, Thick}},
  PlotRange → All, Frame → {{True, False}, {True, False}},
  BaseStyle → {FontWeight → "Bold", FontColor → Black, FontSize → 12}]

```

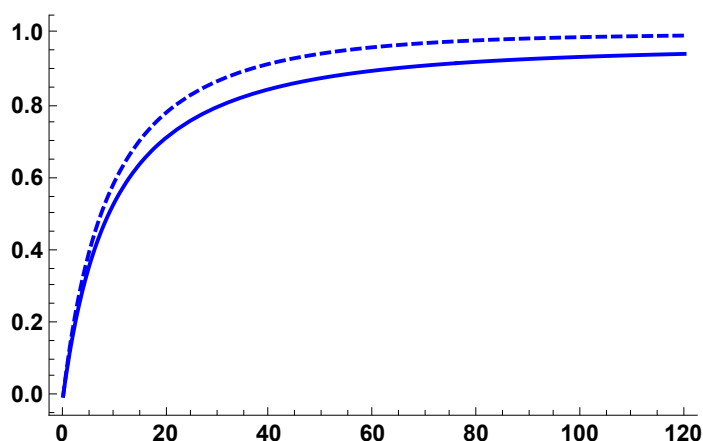

```
Ph09p005A = Plot[{{ExpISV[5000, 0.05, 0.9, 0,  $\frac{R}{10000}$ , 0.05]}},
  {R, 0, 120}, PlotStyle -> {{Blue, Thick}},
  PlotRange -> All, Frame -> {{True, False}, {True, False}},
  BaseStyle -> {FontWeight -> "Bold", FontColor -> Black, FontSize -> 12}];
```

SLiM simulation data plot

```
Ph09p005S = ErrorListPlot[PiRelh09p005S,
  PlotStyle -> {Blue, PointSize[0.02]}, PlotRange -> {{0, 120}, {0, 1.1}}]
```

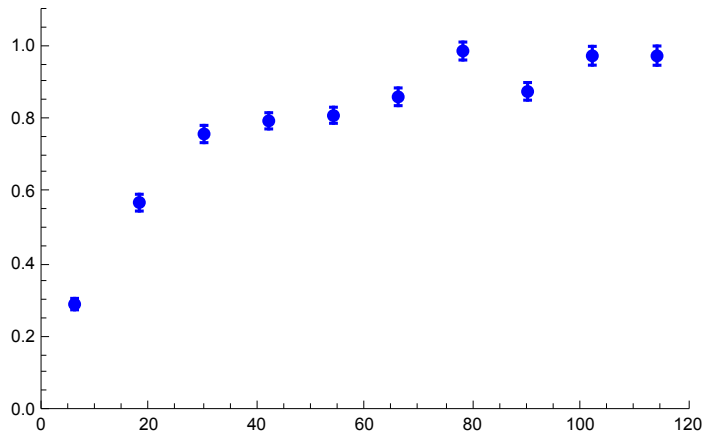

MSMS simulation data plot

```
Ph09p005MSMSS = ErrorListPlot[PiRelh09p005MSMSS,
  PlotStyle -> {Cyan, PointSize[0.02]}, PlotRange -> {{0, 120}, {0, 1.1}}]
```

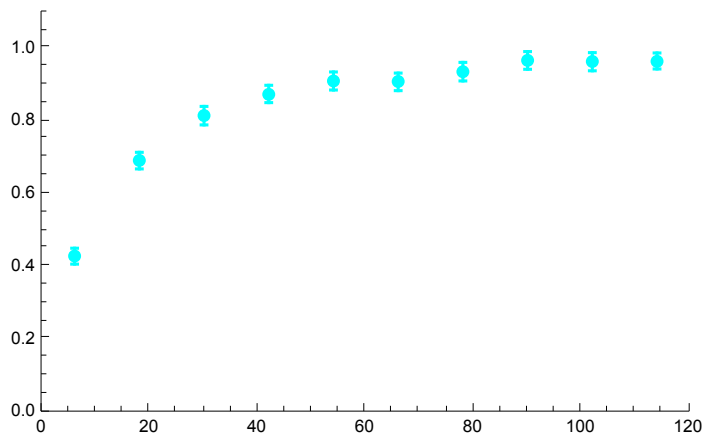

Analytical results against both types of simulation data

```
h09MSMS5pc = Show[Ph09p005, Ph09p005S, Ph09p005MSMSS, ImageSize -> 250]
```

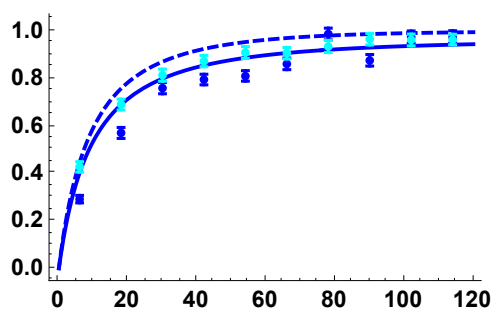

All  $h$  values, using the coalescence-in-sweep-phase results and SLiM simulations:

```
Sims05pc = Show[Ph01p005A, Ph01p005S,
  Ph05p005A, Ph05p005S, Ph09p005A, Ph09p005S, ImageSize → 250]
```

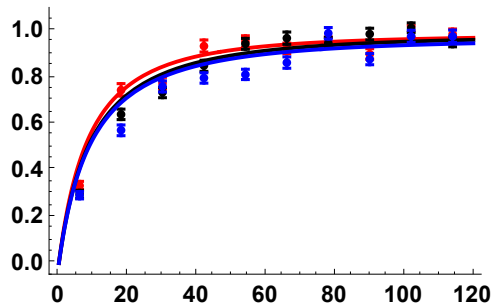

All  $h$  values, comparing star-like approximation with coalescence-in-sweep-phase results:

```
Sims05pc2 = Show[Ph01p005, Ph05p005, Ph09p005, ImageSize → 250]
```

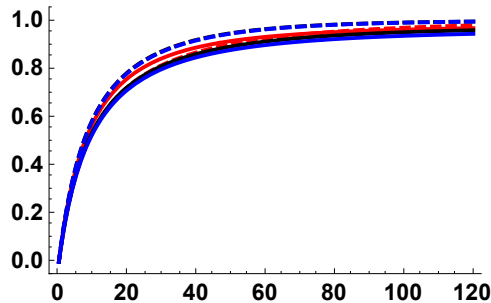

## Results Grid: comparing SLiM and MSMS Simulations

```
SLiMandMSMSRes = Labeled[
  Grid[{{Text@TraditionalForm@Style["h = 0.1", 24, TextAlignment → Center],
    Text@TraditionalForm@Style["h = 0.5", 24], Text@
    TraditionalForm@Style["h = 0.9", 24]}, {Text@TraditionalForm@Style[
    "Red points: forward-in-time\nPink points: coalescent simulations",
    14, TextAlignment → Center], Text@TraditionalForm@Style[
    "Black points: forward-in-time\nGrey points: coalescent simulations",
    14, TextAlignment → Center], Text@TraditionalForm@Style[
    "Blue points: forward-in-time\nCyan points: coalescent simulations",
    14, TextAlignment → Center]}, {
    {h01MSMS, h05MSMS, h09MSMS, Text@TraditionalForm@Style["p0 = 1/2N", 24]},
    {h01MSMS2pc, h05MSMS2pc, h09MSMS2pc,
    Text@TraditionalForm@Style["p0 = 0.02", 24]},
    {h01MSMS5pc, h05MSMS5pc, h09MSMS5pc,
    Text@TraditionalForm@Style["p0 = 0.05", 24]}}, Spacings → {2, 1}},
  {Text@TraditionalForm@Style["Expected\nRelative\nDiversity, \nE[πSV/π0]", 24],
  Text@TraditionalForm@Style["Scaled Recombination Rate, 2Nr", 24]}, {Left,
  Bottom}]
```

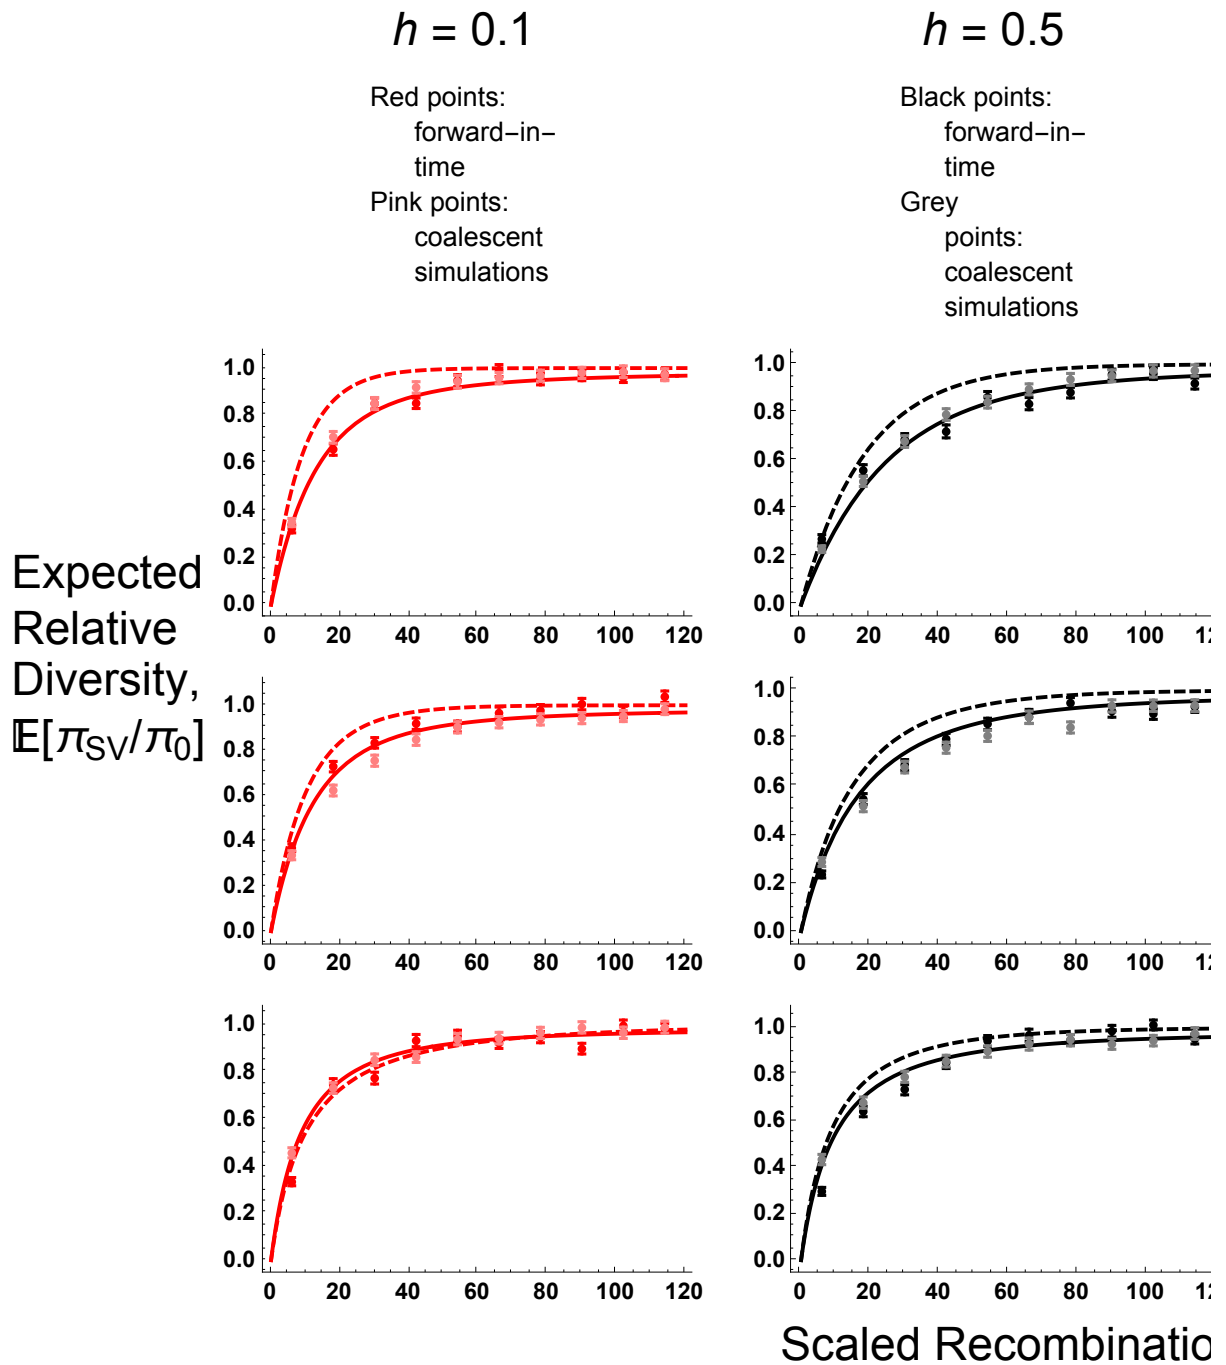

$$\sigma = 1/2 \ (F = 1/3)$$

All simulation data from here on is from SLiM.

Preliminaries

```
SetDirectory[NotebookDirectory[]];
Rin = Table[11 + 22 * i, {i, 0, 9}];
```

Simulation comparisons, from initial frequency  $p_0 = 1/2 N$

$h = 0.5$

```

PiRelh05s05 =
  Import["SLIM_F033/StatsProc_R_220_h_0.5_self_0.5_f_1e-04_10b_SLIM.dat",
    "Table"][[10]];
PiRelh05s05CIB = Import[
  "SLIM_F033/StatsProc_R_220_h_0.5_self_0.5_f_1e-04_10b_SLIM.dat",
  "Table"][[11]];
PiRelh05s05CIT = Import[
  "SLIM_F033/StatsProc_R_220_h_0.5_self_0.5_f_1e-04_10b_SLIM.dat",
  "Table"][[12]];
PiRelh05s05S = Partition[Riffle[Partition[Riffle[Rin, PiRelh05s05], 2],
  Map[ErrorBar, Partition[Riffle[-PiRelh05s05CIB, PiRelh05s05CIT], 2]], 2];

Ph05s05 = Plot[{PWR2B[5000, 0.05, 0.5, 0.5, R, Boostp0[5000, 0.05, 0.5, 0.5]],
  ExPiSV[5000, 0.05, 0.5, 0.5,  $\frac{R}{10\,000}$ , Boostp0[5000, 0.05, 0.5, 0.5]]},
  {R, 0, 220}, PlotStyle → {{Black, Thick, Dashed}, {Black, Thick}},
  PlotRange → All, Frame → {{True, False}, {True, False}},
  BaseStyle → {FontWeight → "Bold", FontColor → Black, FontSize → 12}]

```

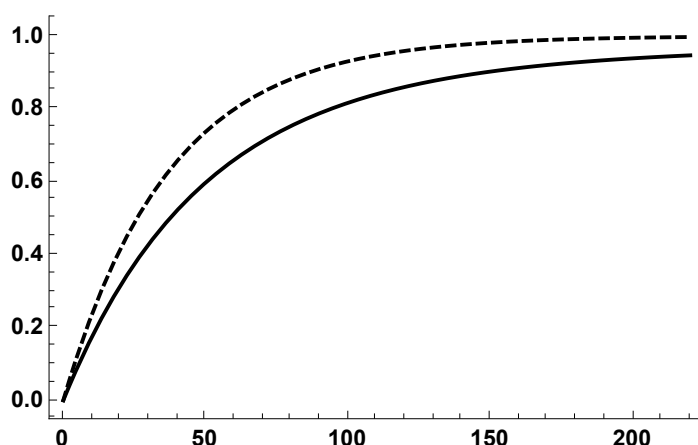

```

Ph05s05A =
  Plot[{ExPiSV[5000, 0.05, 0.5, 0.5,  $\frac{R}{10\,000}$ , Boostp0[5000, 0.05, 0.5, 0.5]]},
  {R, 0, 220}, PlotStyle → {{Black, Thick}},
  PlotRange → All, Frame → {{True, False}, {True, False}},
  BaseStyle → {FontWeight → "Bold", FontColor → Black, FontSize → 12}];

```



```
Ph05s05S = ErrorListPlot[PiRelh05s05S,
  PlotStyle -> {Black, PointSize[0.02]}, PlotRange -> {{0, 220}, {0, 1.1}}]
```

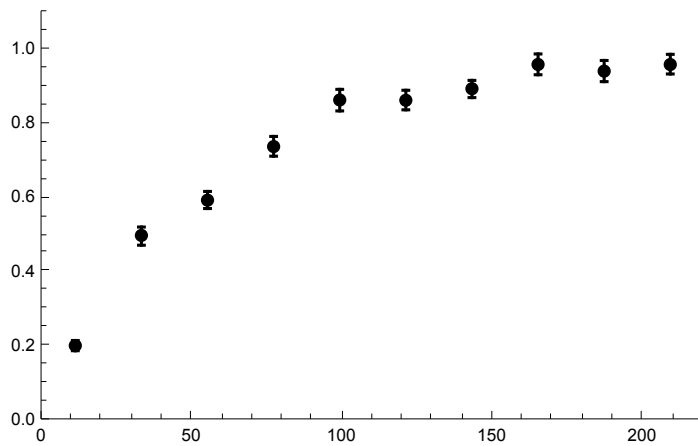

```
Show[Ph05s05, Ph05s05S]
```

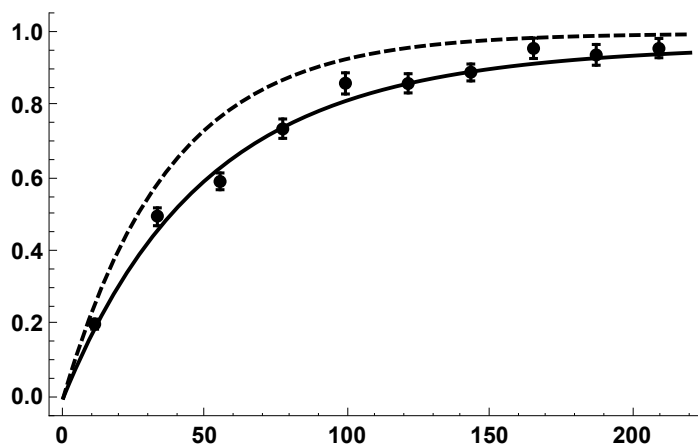

```
h = 0.1
```

```
PiRelh01s05 =
  Import["SLIM_F033/StatsProc_R_220_h_0.1_self_0.5_f_1e-04_10b_SLIM.dat",
    "Table"][[10]];
PiRelh01s05CIB = Import[
  "SLIM_F033/StatsProc_R_220_h_0.1_self_0.5_f_1e-04_10b_SLIM.dat",
  "Table"][[11]];
PiRelh01s05CIT = Import[
  "SLIM_F033/StatsProc_R_220_h_0.1_self_0.5_f_1e-04_10b_SLIM.dat",
  "Table"][[12]];
PiRelh01s05S = Partition[Riffle[Partition[Riffle[Rin, PiRelh01s05], 2],
  Map[ErrorBar, Partition[Riffle[-PiRelh01s05CIB, PiRelh01s05CIT], 2]]], 2];
```

```
Ph01s05 = Plot[{{PWR2B[5000, 0.05, 0.1, 0.5, R, Boostp0[5000, 0.05, 0.1, 0.5]],
  ExPiSV[5000, 0.05, 0.1, 0.5,  $\frac{R}{10\,000}$ , Boostp0[5000, 0.05, 0.1, 0.5]]},
  {R, 0, 220}, PlotStyle -> {{Red, Thick, Dashed}, {Red, Thick}},
  PlotRange -> All, Frame -> {{True, False}, {True, False}},
  BaseStyle -> {FontWeight -> "Bold", FontColor -> Black, FontSize -> 12}]
```

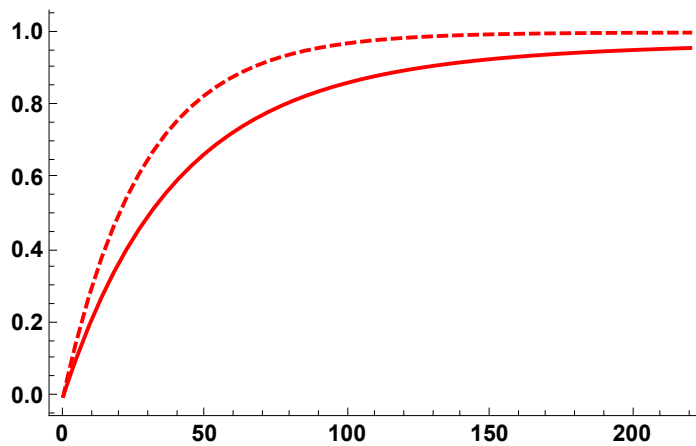

```
Ph01s05A =
```

```
Plot[{{ExPiSV[5000, 0.05, 0.1, 0.5,  $\frac{R}{10\,000}$ , Boostp0[5000, 0.05, 0.1, 0.5]]},
  {R, 0, 220}, PlotStyle -> {{Red, Thick}},
  PlotRange -> All, Frame -> {{True, False}, {True, False}},
  BaseStyle -> {FontWeight -> "Bold", FontColor -> Black, FontSize -> 12}];
```

```
Ph01s05S = ErrorListPlot[PiRelh01s05S,
  PlotStyle -> {Red, PointSize[0.02]}, PlotRange -> {{0, 220}, {0, 1.1}}]
```

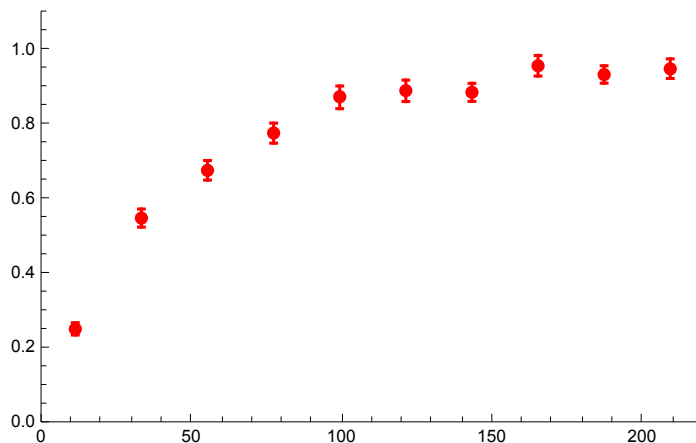

```
Show[Ph01s05, Ph01s05S]
```

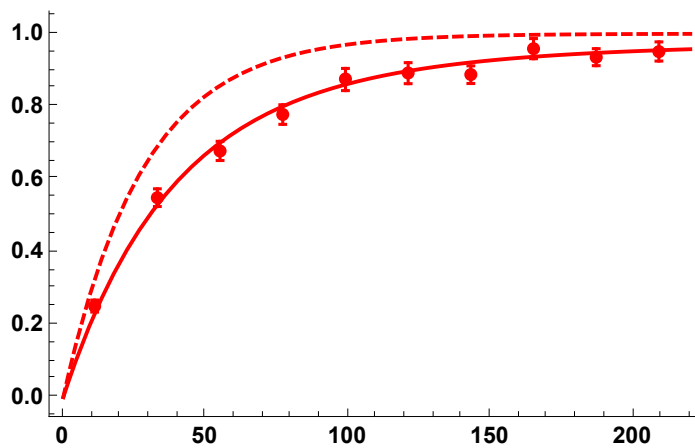

```
h = 0.9
```

```
PiRelh09s05 =
```

```
  Import["SLIM_F033/StatsProc_R_220_h_0.9_self_0.5_f_1e-04_10b_SLIM.dat",
    "Table"][[10]];
```

```
PiRelh09s05CIB = Import[
```

```
  "SLIM_F033/StatsProc_R_220_h_0.9_self_0.5_f_1e-04_10b_SLIM.dat",
  "Table"][[11]];
```

```
PiRelh09s05CIT = Import[
```

```
  "SLIM_F033/StatsProc_R_220_h_0.9_self_0.5_f_1e-04_10b_SLIM.dat",
  "Table"][[12]];
```

```
PiRelh09s05S = Partition[Riffle[Partition[Riffle[Rin, PiRelh09s05], 2],
```

```
  Map[ErrorBar, Partition[Riffle[-PiRelh09s05CIB, PiRelh09s05CIT], 2]]], 2];
```

```
Ph09s05 = Plot[{PWR2B[5000, 0.05, 0.9, 0.5, R, Boostp0[5000, 0.05, 0.9, 0.5]],
```

```
  ExpISV[5000, 0.05, 0.9, 0.5,  $\frac{R}{10000}$ , Boostp0[5000, 0.05, 0.9, 0.5]]},
```

```
  {R, 0, 220}, PlotStyle -> {{Blue, Thick, Dashed}, {Blue, Thick}},
```

```
  PlotRange -> All, Frame -> {{True, False}, {True, False}},
```

```
  BaseStyle -> {FontWeight -> "Bold", FontColor -> Black, FontSize -> 12}]
```

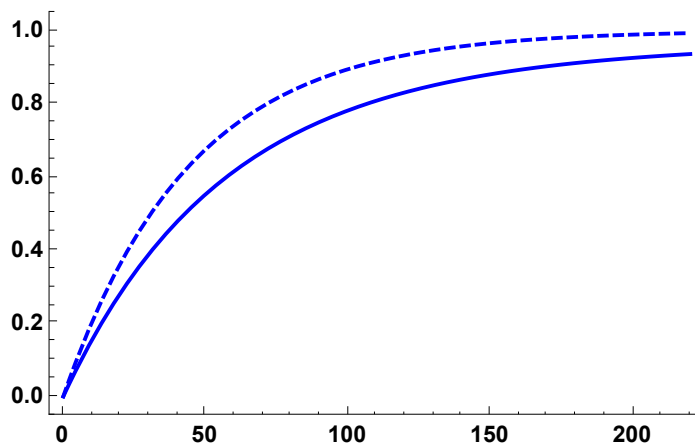

Ph09s05A =

```
Plot[{{ExpISV[5000, 0.05, 0.9, 0.5,  $\frac{R}{10\,000}$ , Boostp0[5000, 0.05, 0.9, 0.5]]}},
  {R, 0, 220}, PlotStyle -> {{Blue, Thick}},
  PlotRange -> All, Frame -> {{True, False}, {True, False}},
  BaseStyle -> {FontWeight -> "Bold", FontColor -> Black, FontSize -> 12}];
```

Ph09s05S = ErrorListPlot[PiRelh09s05S,

```
PlotStyle -> {Blue, PointSize[0.02]}, PlotRange -> {{0, 220}, {0, 1}}]
```

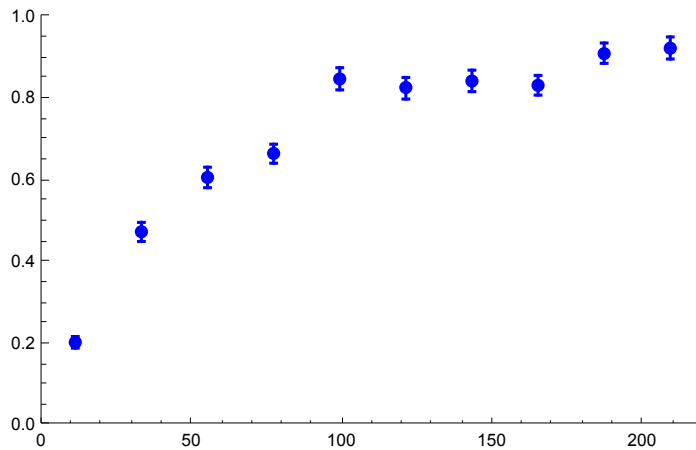

Show[Ph09s05, Ph09s05S]

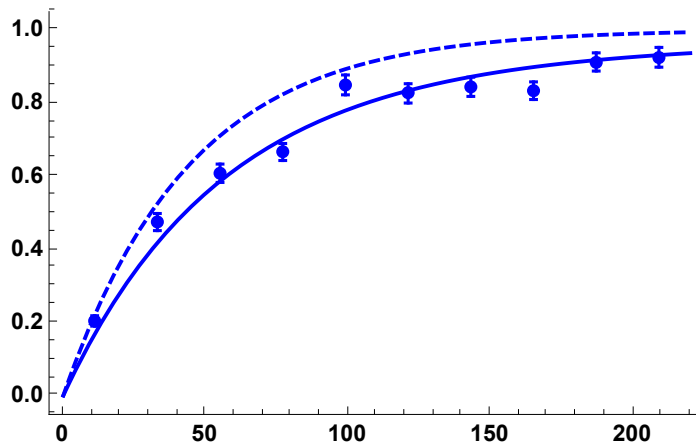

All h values, using the coalescence-in-sweep-phase results and simulations:

Sims05DN =

```
Show[Ph01s05A, Ph01s05S, Ph05s05A, Ph05s05S, Ph09s05A, Ph09s05S, ImageSize -> 250]
```

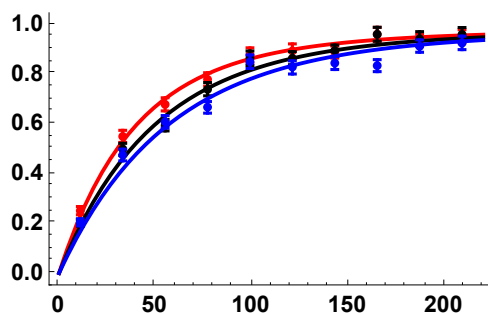

All  $h$  values, comparing star-like approximation with coalescence-in-sweep-phase results:

```
Sims05DN2 = Show[Ph01s05, Ph05s05, Ph09s05, ImageSize → 250]
```

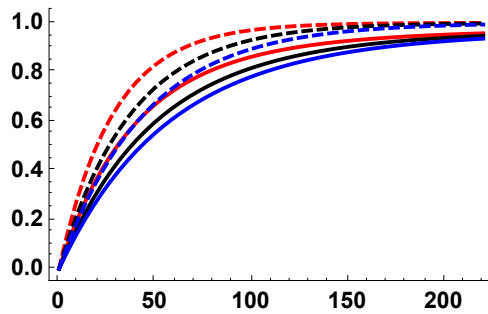

## Simulation comparisons, $p_0 = 0.02$

$h = 0.5$

```
PiRelh05p002s05 =
  Import["SLIM_F033/StatsProc_R_220_h_0.5_self_0.5_f_0.02_10b_SLIM.dat",
    "Table"][[10]];
PiRelh05p002s05CIB = Import[
  "SLIM_F033/StatsProc_R_220_h_0.5_self_0.5_f_0.02_10b_SLIM.dat",
  "Table"][[11]];
PiRelh05p002s05CIT = Import[
  "SLIM_F033/StatsProc_R_220_h_0.5_self_0.5_f_0.02_10b_SLIM.dat",
  "Table"][[12]];
PiRelh05p002s05S = Partition[Riffle[
  Partition[Riffle[Rin, PiRelh05p002s05], 2], Map[ErrorBar,
    Partition[Riffle[-PiRelh05p002s05CIB, PiRelh05p002s05CIT], 2]]], 2];
Ph05p002s05 = Plot[{PWR2B[5000, 0.05, 0.5, 0.5, R, 0.02],
  ExPiSV[5000, 0.05, 0.5, 0.5,  $\frac{R}{10000}$ , 0.02]}, {R, 0, 220},
  PlotStyle → {{Black, Thick, Dashed}, {Black, Thick}},
  PlotRange → All, Frame → {{True, False}, {True, False}},
  BaseStyle → {FontWeight → "Bold", FontColor → Black, FontSize → 12}]
```

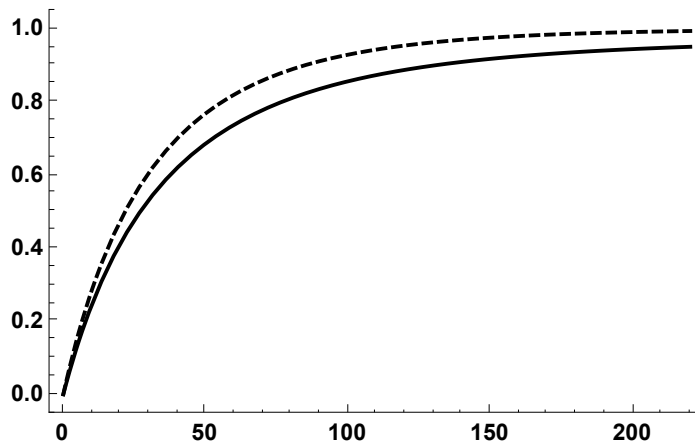

```
Ph05p002s05A = Plot[ {ExpISV[5000, 0.05, 0.5, 0.5,  $\frac{R}{10\,000}$ , 0.02]},
  {R, 0, 220}, PlotStyle -> {{Black, Thick}},
  PlotRange -> All, Frame -> {{True, False}, {True, False}},
  BaseStyle -> {FontWeight -> "Bold", FontColor -> Black, FontSize -> 12}];
```

```
Ph05p002s05S = ErrorListPlot[PiRelh05p002s05S,
  PlotStyle -> {Black, PointSize[0.02]}, PlotRange -> {{0, 220}, {0, 1.1}}]
```

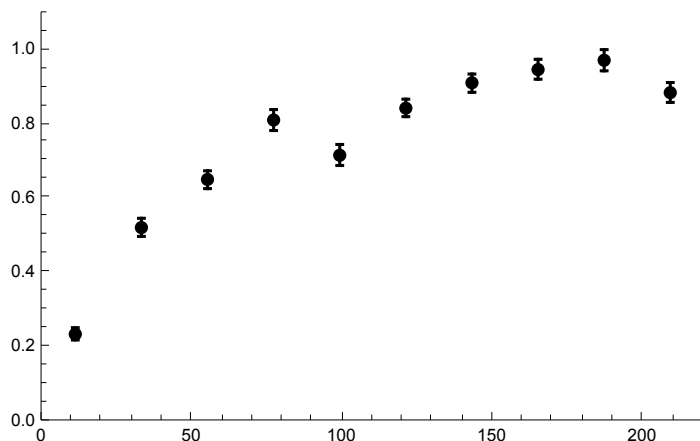

```
Show[Ph05p002s05, Ph05p002s05S]
```

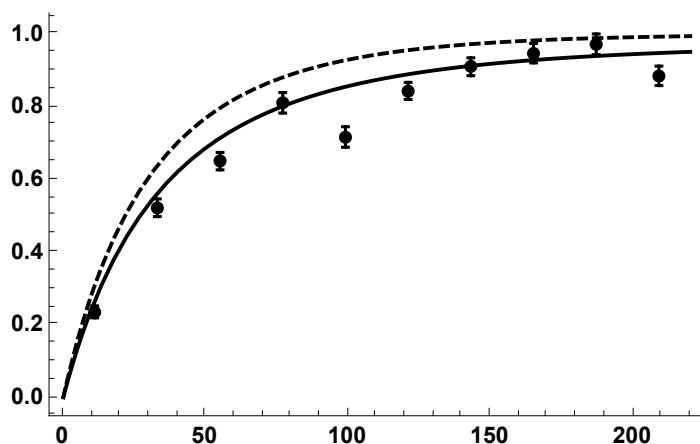

```
h = 0.1
```

```
PiRelh01p002s05 =
  Import["SLIM_F033/StatsProc_R_220_h_0.1_self_0.5_f_0.02_10b_SLIM.dat",
    "Table"][[10]];
PiRelh01p002s05CIB = Import[
  "SLIM_F033/StatsProc_R_220_h_0.1_self_0.5_f_0.02_10b_SLIM.dat",
  "Table"][[11]];
PiRelh01p002s05CIT = Import[
  "SLIM_F033/StatsProc_R_220_h_0.1_self_0.5_f_0.02_10b_SLIM.dat",
  "Table"][[12]];
PiRelh01p002s05S = Partition[Riffle[
  Partition[Riffle[Rin, PiRelh01p002s05], 2], Map[ErrorBar,
    Partition[Riffle[-PiRelh01p002s05CIB, PiRelh01p002s05CIT], 2]]], 2];
```

```
Ph01p002s05 = Plot[ { PWR2B[5000, 0.05, 0.1, 0.5, R, 0.02],
  ExpISV[5000, 0.05, 0.1, 0.5,  $\frac{R}{10000}$ , 0.02] },
  {R, 0, 220}, PlotStyle -> {{Red, Thick, Dashed}, {Red, Thick}},
  PlotRange -> All, Frame -> {{True, False}, {True, False}},
  BaseStyle -> {FontWeight -> "Bold", FontColor -> Black, FontSize -> 12} ]
```

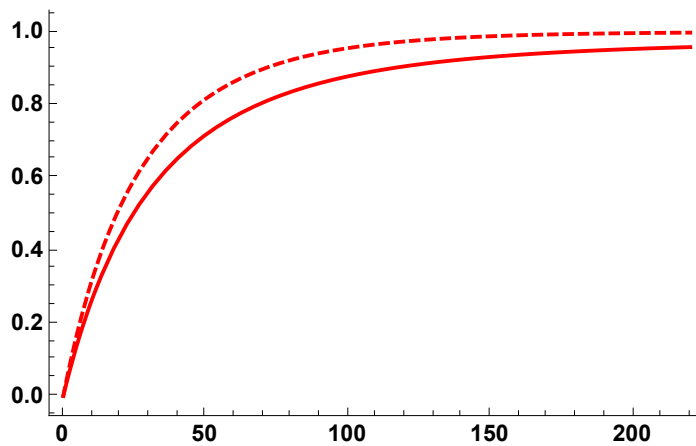

```
Ph01p002s05A = Plot[ { ExpISV[5000, 0.05, 0.1, 0.5,  $\frac{R}{10000}$ , 0.02] },
  {R, 0, 220}, PlotStyle -> {{Red, Thick}},
  PlotRange -> All, Frame -> {{True, False}, {True, False}},
  BaseStyle -> {FontWeight -> "Bold", FontColor -> Black, FontSize -> 12} ];
```

```
Ph01p002s05S = ErrorListPlot[ PiRelh01p002s05S,
  PlotStyle -> {Red, PointSize[0.02]}, PlotRange -> {{0, 220}, {0, 1.1}} ]
```

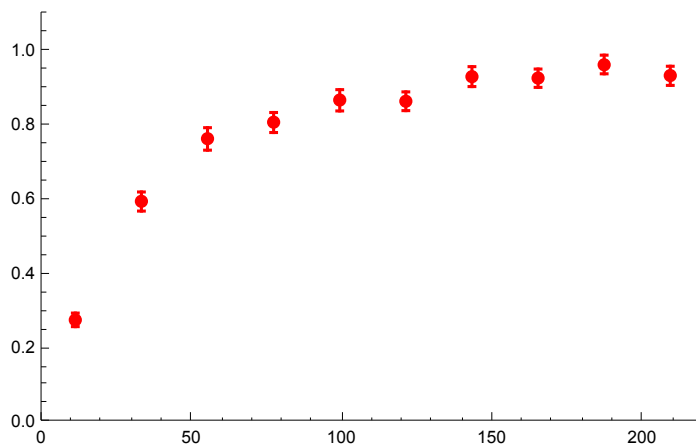

Show[Ph01p002s05, Ph01p002s05S]

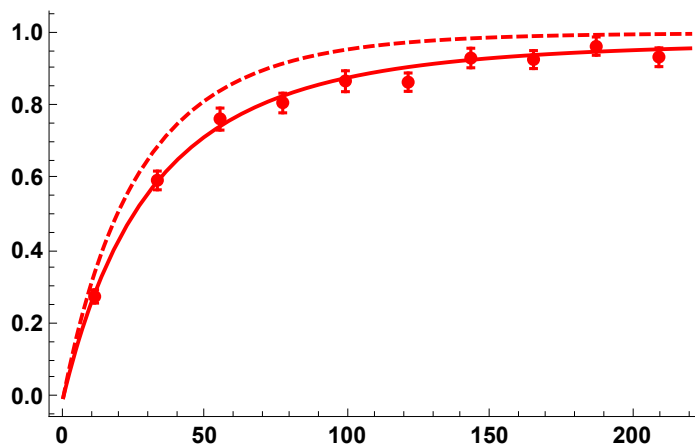

h = 0.9

PiRelh09p002s05 =

```
Import["SLIM_F033/StatsProc_R_220_h_0.9_self_0.5_f_0.02_10b_SLIM.dat",
  "Table"][[10]];
```

PiRelh09p002s05CIB = Import[

```
"SLIM_F033/StatsProc_R_220_h_0.9_self_0.5_f_0.02_10b_SLIM.dat",
  "Table"][[11]];
```

PiRelh09p002s05CIT = Import[

```
"SLIM_F033/StatsProc_R_220_h_0.9_self_0.5_f_0.02_10b_SLIM.dat",
  "Table"][[12]];
```

PiRelh09p002s05S = Partition[Riffle[

```
Partition[Riffle[Rin, PiRelh09p002s05], 2], Map[ErrorBar,
  Partition[Riffle[-PiRelh09p002s05CIB, PiRelh09p002s05CIT], 2]]], 2];
```

Ph09p002s05 = Plot[{PWR2B[5000, 0.05, 0.9, 0.5, R, 0.02],

```
ExPiSV[5000, 0.05, 0.9, 0.5,  $\frac{R}{10000}$ , 0.02]]},
```

```
{R, 0, 220}, PlotStyle → {{Blue, Thick, Dashed}, {Blue, Thick}},
```

```
PlotRange → All, Frame → {{True, False}, {True, False}},
```

```
BaseStyle → {FontWeight → "Bold", FontColor → Black, FontSize → 12}]
```

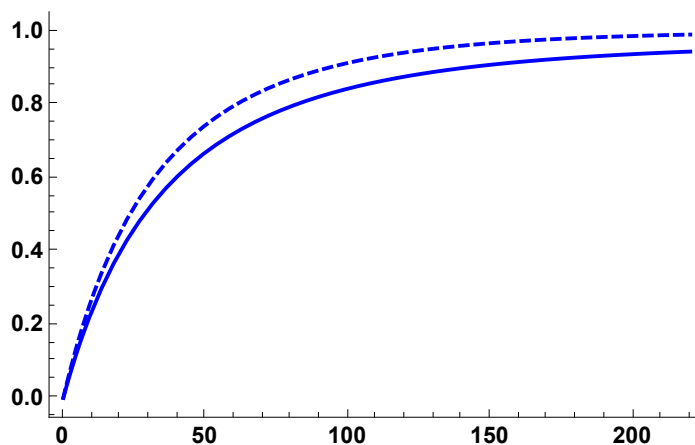



```
Ph09p002s05A = Plot[{{ExpISV[5000, 0.05, 0.9, 0.5,  $\frac{R}{10000}$ , 0.02]}},
  {R, 0, 220}, PlotStyle -> {{Blue, Thick}},
  PlotRange -> All, Frame -> {{True, False}, {True, False}},
  BaseStyle -> {FontWeight -> "Bold", FontColor -> Black, FontSize -> 12}];
```

```
Ph09p002s05S = ErrorListPlot[PiRelh09p002s05S,
  PlotStyle -> {Blue, PointSize[0.02]}, PlotRange -> {{0, 220}, {0, 1.1}}]
```

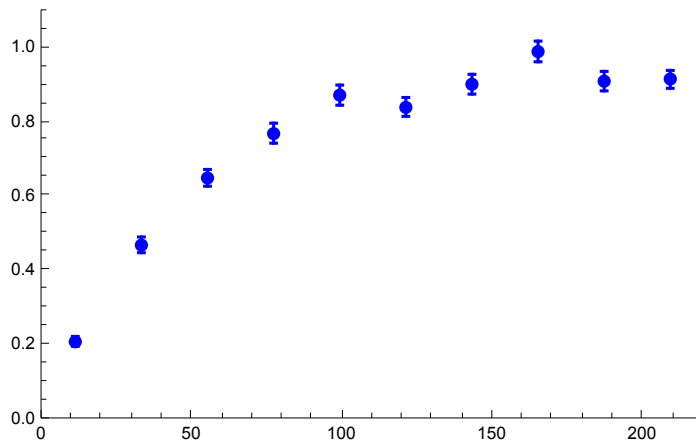

```
Show[Ph09p002s05, Ph09p002s05S]
```

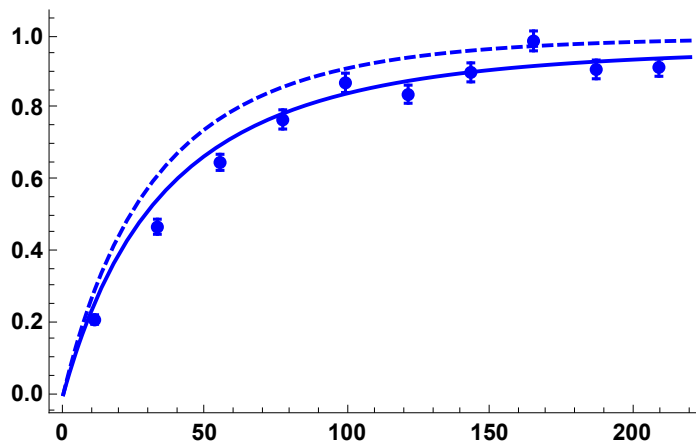

All h values, using the coalescence-in-sweep-phase results and simulations:

```
Sims052pc = Show[Ph01p002s05A, Ph01p002s05S, Ph05p002s05A,
  Ph05p002s05S, Ph09p002s05A, Ph09p002s05S, ImageSize -> 250]
```

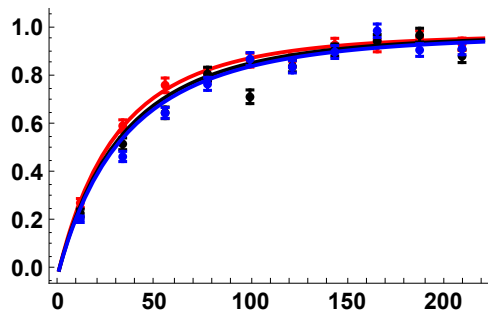

All h values, comparing star-like approximation with coalescence-in-sweep-phase results:

```
Sims052pc2 = Show[Ph01p002s05, Ph05p002s05, Ph09p002s05, ImageSize → 250]
```

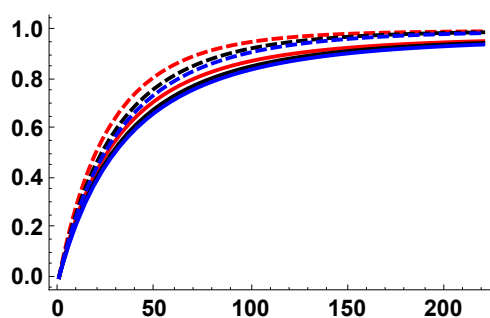

## Simulation comparisons, $p_0 = 0.05$

$h = 0.5$

```
PiRelh05p005s05 =
  Import["SLIM_F033/StatsProc_R_220_h_0.5_self_0.5_f_0.05_10b_SLIM.dat",
    "Table"][[10]];
PiRelh05p005s05CIB = Import[
  "SLIM_F033/StatsProc_R_220_h_0.5_self_0.5_f_0.05_10b_SLIM.dat",
  "Table"][[11]];
PiRelh05p005s05CIT = Import[
  "SLIM_F033/StatsProc_R_220_h_0.5_self_0.5_f_0.05_10b_SLIM.dat",
  "Table"][[12]];
PiRelh05p005s05S = Partition[Riffle[
  Partition[Riffle[Rin, PiRelh05p005s05], 2], Map[ErrorBar,
    Partition[Riffle[-PiRelh05p005s05CIB, PiRelh05p005s05CIT], 2]]], 2];
Ph05p005s05 = Plot[{PWR2B[5000, 0.05, 0.5, 0.5, R, 0.05],
  ExPiSV[5000, 0.05, 0.5, 0.5,  $\frac{R}{10000}$ , 0.05]}, {R, 0, 220},
  PlotStyle → {{Black, Thick, Dashed}, {Black, Thick}},
  PlotRange → All, Frame → {{True, False}, {True, False}},
  BaseStyle → {FontWeight → "Bold", FontColor → Black, FontSize → 12}]
```

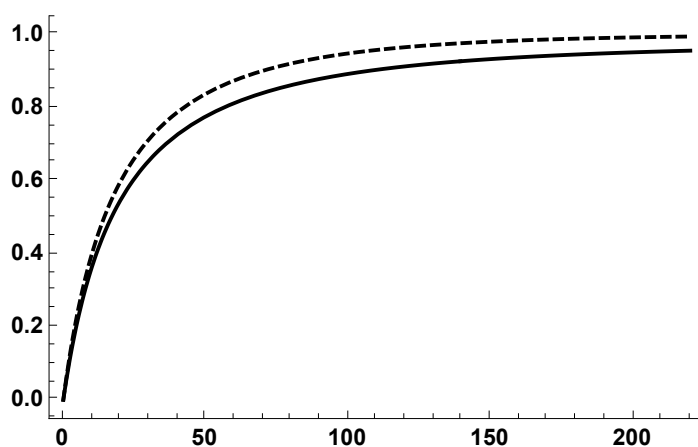

```
Ph05p005s05A = Plot[{{ExpISV[5000, 0.05, 0.5, 0.5,  $\frac{R}{10000}$ , 0.05]}},
  {R, 0, 220}, PlotStyle -> {{Black, Thick}},
  PlotRange -> All, Frame -> {{True, False}, {True, False}},
  BaseStyle -> {FontWeight -> "Bold", FontColor -> Black, FontSize -> 12}];
```

```
Ph05p005s05S = ErrorListPlot[PiRelh05p005s05S,
  PlotStyle -> {Black, PointSize[0.02]}, PlotRange -> {{0, 220}, {0, 1.1}}]
```

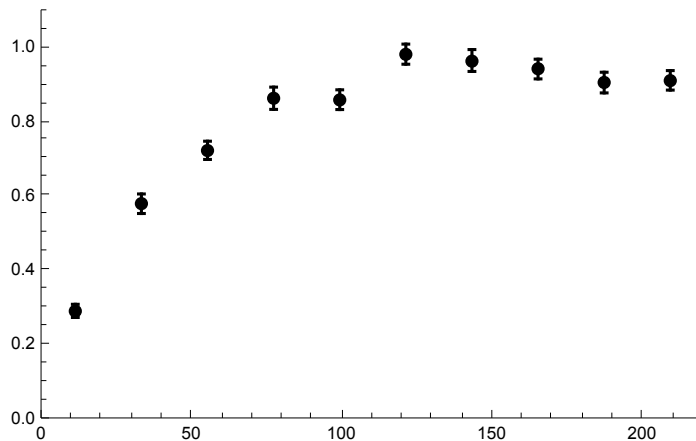

```
Show[Ph05p005s05, Ph05p005s05S]
```

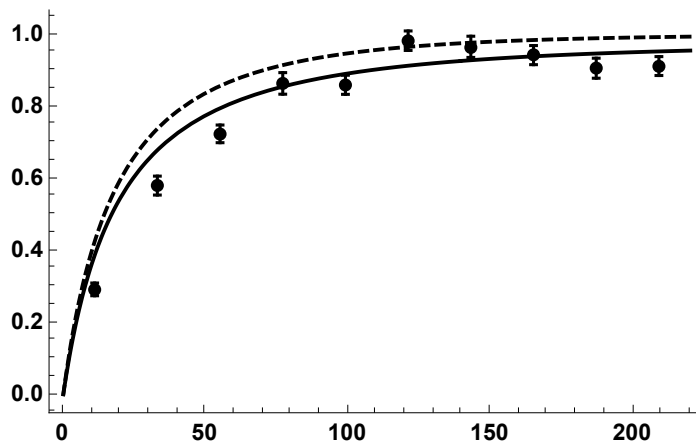

```
h = 0.1
```

```
PiRelh01p005s05 =
  Import["SLIM_F033/StatsProc_R_220_h_0.1_self_0.5_f_0.05_10b_SLIM.dat",
    "Table"][[10]];
PiRelh01p005s05CIB = Import[
  "SLIM_F033/StatsProc_R_220_h_0.1_self_0.5_f_0.05_10b_SLIM.dat",
  "Table"][[11]];
PiRelh01p005s05CIT = Import[
  "SLIM_F033/StatsProc_R_220_h_0.1_self_0.5_f_0.05_10b_SLIM.dat",
  "Table"][[12]];
PiRelh01p005s05S = Partition[Riffle[
  Partition[Riffle[Rin, PiRelh01p005s05], 2], Map[ErrorBar,
    Partition[Riffle[-PiRelh01p005s05CIB, PiRelh01p005s05CIT], 2]]], 2];
```

```
Ph01p005s05 = Plot[ { PWR2B[5000, 0.05, 0.1, 0.5, R, 0.05],
  ExpPiSV[5000, 0.05, 0.1, 0.5,  $\frac{R}{10000}$ , 0.05] },
  {R, 0, 220}, PlotStyle -> {{Red, Thick, Dashed}, {Red, Thick}},
  PlotRange -> All, Frame -> {{True, False}, {True, False}},
  BaseStyle -> {FontWeight -> "Bold", FontColor -> Black, FontSize -> 12} ]
```

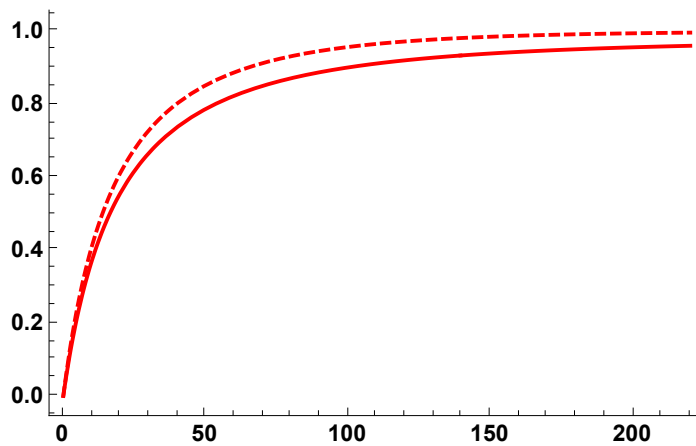

```
Ph01p005s05A = Plot[ { ExpPiSV[5000, 0.05, 0.1, 0.5,  $\frac{R}{10000}$ , 0.05] },
  {R, 0, 220}, PlotStyle -> {{Red, Thick}},
  PlotRange -> All, Frame -> {{True, False}, {True, False}},
  BaseStyle -> {FontWeight -> "Bold", FontColor -> Black, FontSize -> 12} ];
```

```
Ph01p005s05S = ErrorListPlot[ PiRelh01p005s05S,
  PlotStyle -> {Red, PointSize[0.02]}, PlotRange -> {{0, 220}, {0, 1.1}} ]
```

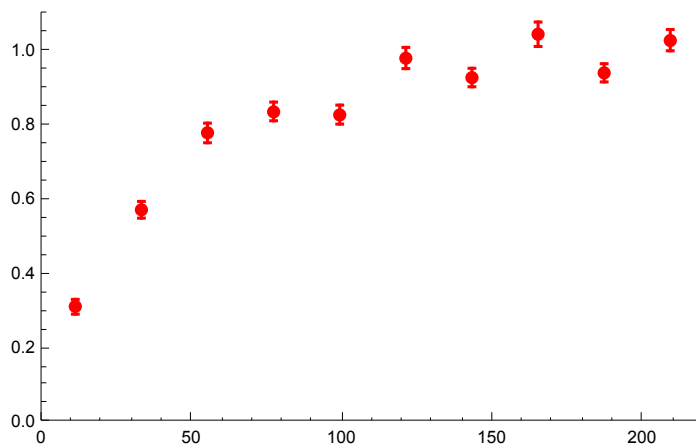

```
Show[Ph01p005s05, Ph01p005s05S]
```

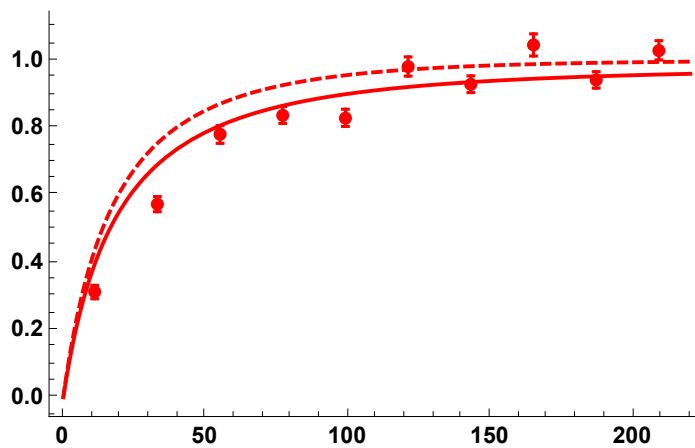

```
h = 0.9
```

```
PiRelh09p005s05 =
  Import["SLIM_F033/StatsProc_R_220_h_0.9_self_0.5_f_0.05_10b_SLIM.dat",
    "Table"][[10]];
PiRelh09p005s05CIB = Import[
  "SLIM_F033/StatsProc_R_220_h_0.9_self_0.5_f_0.05_10b_SLIM.dat",
  "Table"][[11]];
PiRelh09p005s05CIT = Import[
  "SLIM_F033/StatsProc_R_220_h_0.9_self_0.5_f_0.05_10b_SLIM.dat",
  "Table"][[12]];
PiRelh09p005s05S = Partition[Riffle[
  Partition[Riffle[Rin, PiRelh09p005s05], 2], Map[ErrorBar,
    Partition[Riffle[-PiRelh09p005s05CIB, PiRelh09p005s05CIT], 2]]], 2];
Ph09p005s05 = Plot[{PWR2B[5000, 0.05, 0.9, 0.5, R, 0.05],
  ExpISV[5000, 0.05, 0.9, 0.5,  $\frac{R}{10000}$ , 0.05]}],
  {R, 0, 220}, PlotStyle → {{Blue, Thick, Dashed}, {Blue, Thick}},
  PlotRange → All, Frame → {{True, False}, {True, False}},
  BaseStyle → {FontWeight → "Bold", FontColor → Black, FontSize → 12}]
```

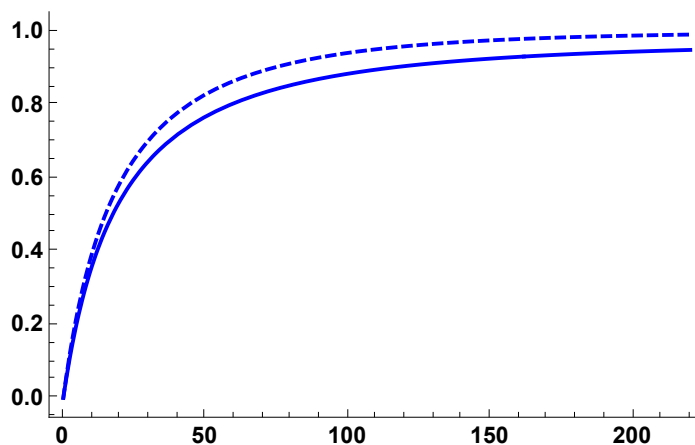

```
Ph09p005s05A = Plot[{{ExpISV[5000, 0.05, 0.9, 0.5,  $\frac{R}{10000}$ , 0.05]}},
  {R, 0, 220}, PlotStyle -> {{Blue, Thick}},
  PlotRange -> All, Frame -> {{True, False}, {True, False}},
  BaseStyle -> {FontWeight -> "Bold", FontColor -> Black, FontSize -> 12}];
```

```
Ph09p005s05S = ErrorListPlot[PiRelh09p005s05S,
  PlotStyle -> {Blue, PointSize[0.02]}, PlotRange -> {{0, 220}, {0, 1.1}}]
```

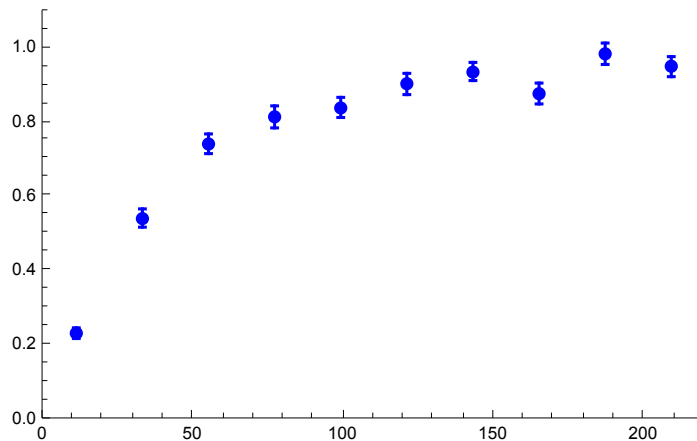

```
Show[Ph09p005s05, Ph09p005s05S]
```

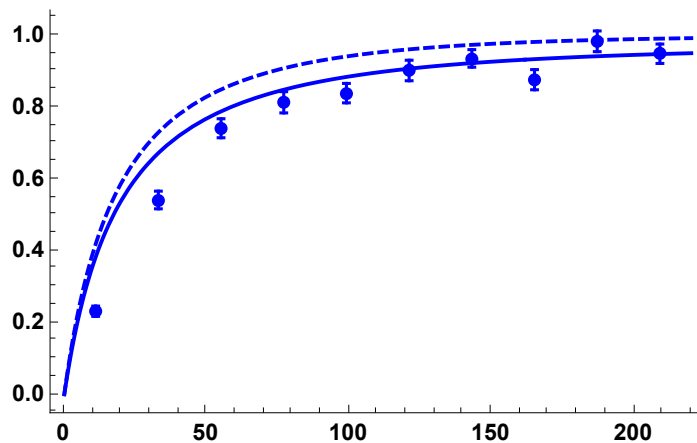

All h values, using the coalescence-in-sweep-phase results and simulations:

```
Sims055pc = Show[Ph01p005s05A, Ph01p005s05S, Ph05p005s05A,
  Ph05p005s05S, Ph09p005s05A, Ph09p005s05S, ImageSize -> 250]
```

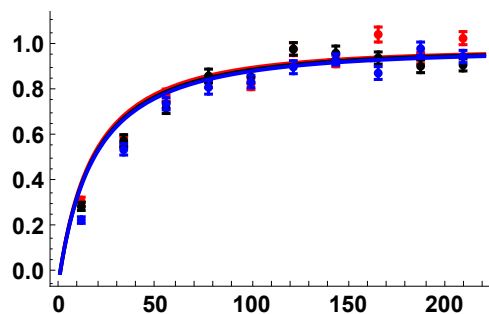

All h values, comparing star-like approximation with coalescence-in-sweep-phase results:

```
Sims055pc2 = Show[Ph01p005s05, Ph05p005s05, Ph09p005s05, ImageSize -> 250]
```

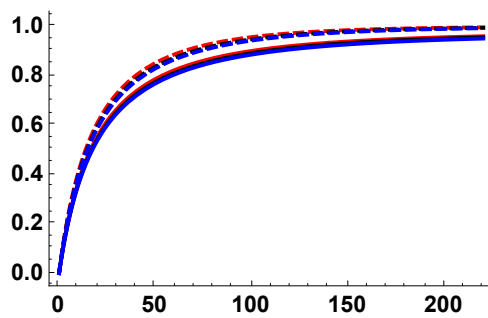

$$\sigma = 0.95 \ (F \approx 0.904)$$

Preliminaries

```
SetDirectory[NotebookDirectory[]];
Rin = Table[100 + 200 * i, {i, 0, 9}];
```

Simulation comparisons, from initial frequency  $p_0 = 1/2 N$

$h = 0.5$

```
PiRelh05s095 =
  Import["SLIM_F09/StatsProc_R_2000_h_0.5_self_0.95_f_1e-04_10b_SLIM.dat",
    "Table"][[10]];
PiRelh05s095CIB = Import[
  "SLIM_F09/StatsProc_R_2000_h_0.5_self_0.95_f_1e-04_10b_SLIM.dat",
  "Table"][[11]];
PiRelh05s095CIT = Import[
  "SLIM_F09/StatsProc_R_2000_h_0.5_self_0.95_f_1e-04_10b_SLIM.dat",
  "Table"][[12]];
PiRelh05s095S = Partition[Riffle[Partition[Riffle[Rin, PiRelh05s095], 2],
  Map[ErrorBar, Partition[Riffle[-PiRelh05s095CIB, PiRelh05s095CIT], 2]], 2];
```

```
Ph05s095 = Plot[{{PWR2B[5000, 0.05, 0.5, 0.95, R, Boostp0[5000, 0.05, 0.5, 0.95]],
  ExpISV[5000, 0.05, 0.5, 0.95,  $\frac{R}{10\,000}$ , Boostp0[5000, 0.05, 0.5, 0.95]]}},
  {R, 0, 2000}, PlotStyle -> {{Black, Thick, Dashed}, {Black, Thick}},
  PlotRange -> All, Frame -> {{True, False}, {True, False}},
  BaseStyle -> {FontWeight -> "Bold", FontColor -> Black, FontSize -> 12}]
```

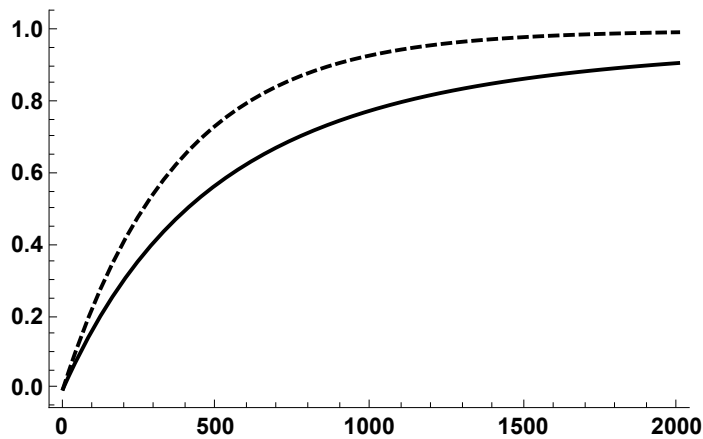

Ph05s095A =

```
Plot[{{ExpISV[5000, 0.05, 0.5, 0.95,  $\frac{R}{10\,000}$ , Boostp0[5000, 0.05, 0.5, 0.95]]}},
  {R, 0, 2000}, PlotStyle -> {{Black, Thick}},
  PlotRange -> All, Frame -> {{True, False}, {True, False}},
  BaseStyle -> {FontWeight -> "Bold", FontColor -> Black, FontSize -> 12}];
```

```
Ph05s095S = ErrorListPlot[PiRelh05s095S,
  PlotStyle -> {Black, PointSize[0.02]}, PlotRange -> {{0, 2000}, {0, 1.1}}]
```

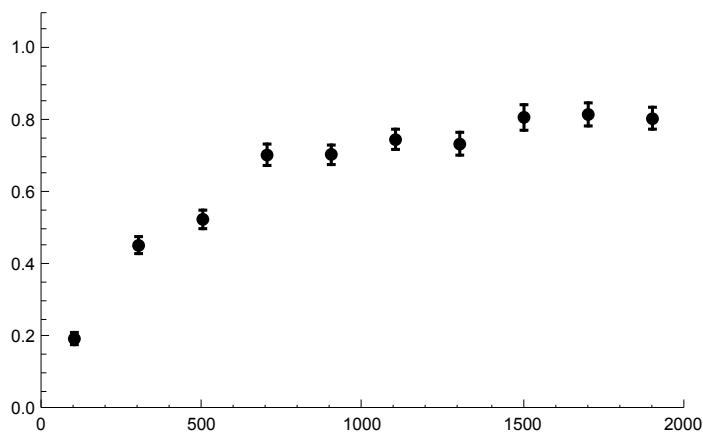



```
Show[Ph05s095, Ph05s095S]
```

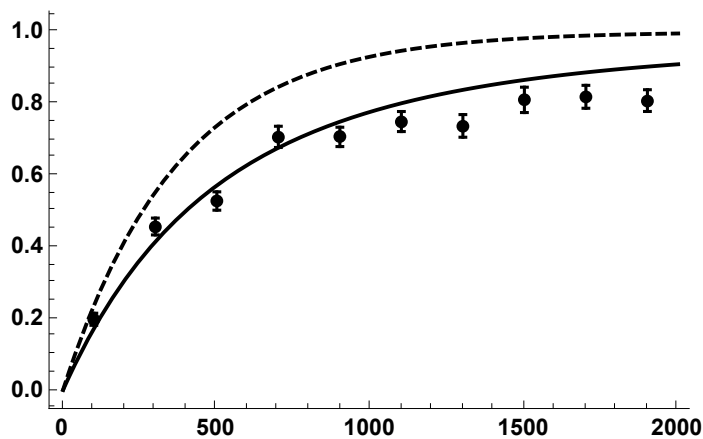

```
h = 0.1
```

```
PiRelh01s095 =
```

```
  Import["SLIM_F09/StatsProc_R_2000_h_0.1_self_0.95_f_1e-04_10b_SLIM.dat",
    "Table"][[10]];
PiRelh01s095CIB = Import[
```

```
  "SLIM_F09/StatsProc_R_2000_h_0.1_self_0.95_f_1e-04_10b_SLIM.dat",
  "Table"][[11]];
PiRelh01s095CIT = Import[
```

```
  "SLIM_F09/StatsProc_R_2000_h_0.1_self_0.95_f_1e-04_10b_SLIM.dat",
  "Table"][[12]];
PiRelh01s095S = Partition[Riffle[Partition[Riffle[Rin, PiRelh01s095], 2],
```

```
  Map[ErrorBar, Partition[Riffle[-PiRelh01s095CIB, PiRelh01s095CIT], 2]], 2];
```

```
Ph01s095 = Plot[{PWR2B[5000, 0.05, 0.1, 0.95, R, Boostp0[5000, 0.05, 0.1, 0.95]],
```

```
  ExpISV[5000, 0.05, 0.1, 0.95,  $\frac{R}{10000}$ , Boostp0[5000, 0.05, 0.1, 0.95]]},
```

```
  {R, 0, 2000}, PlotStyle → {{Red, Thick, Dashed}, {Red, Thick}},
```

```
  PlotRange → {All, {0, 1}}, Frame → {{True, False}, {True, False}},
```

```
  BaseStyle → {FontWeight → "Bold", FontColor → Black, FontSize → 12}]
```

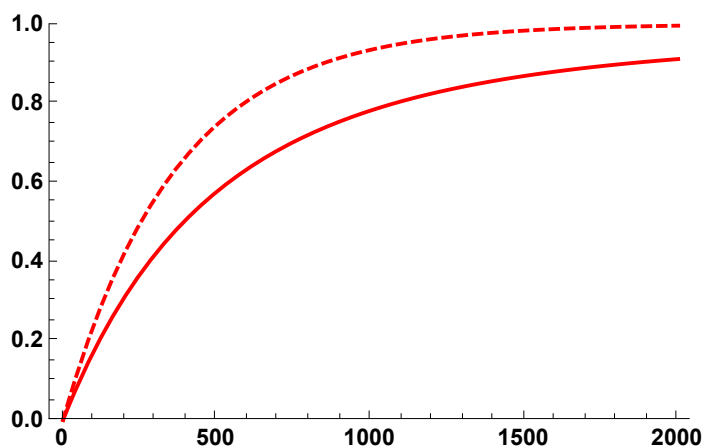

```
Ph01s095A =
```

```
Plot[{{ExpISV[5000, 0.05, 0.1, 0.95,  $\frac{R}{10\,000}$ , Boostp0[5000, 0.05, 0.1, 0.95]]},
      {R, 0, 2000}}, PlotStyle -> {{Red, Thick}},
      PlotRange -> {All, {0, 1}}, Frame -> {{True, False}, {True, False}},
      BaseStyle -> {FontWeight -> "Bold", FontColor -> Black, FontSize -> 12}];
```

```
Ph01s095S = ErrorListPlot[PiRelh01s095S,
```

```
PlotStyle -> {Red, PointSize[0.02]}, PlotRange -> {{0, 2000}, {0, 1.1}}]
```

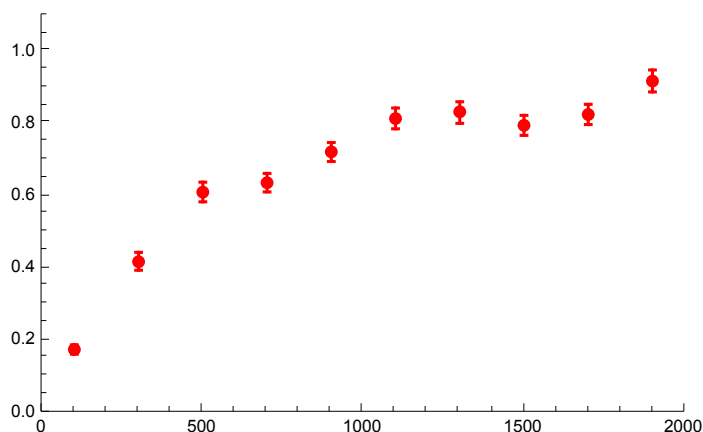

```
Show[Ph01s095, Ph01s095S]
```

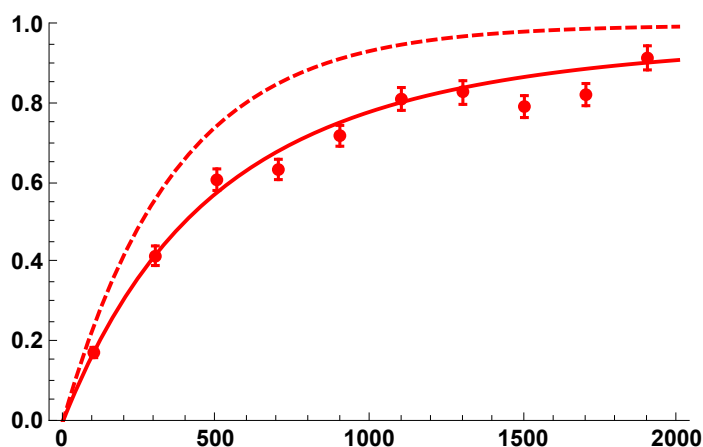

```
h = 0.9
```

```
PiRelh09s095 =
```

```
Import["SLIM_F09/StatsProc_R_2000_h_0.9_self_0.95_f_1e-04_10b_SLIM.dat",
      "Table"][[10]];

```

```
PiRelh09s095CIB = Import[
```

```
  "SLIM_F09/StatsProc_R_2000_h_0.9_self_0.95_f_1e-04_10b_SLIM.dat",
  "Table"][[11]];

```

```
PiRelh09s095CIT = Import[
```

```
  "SLIM_F09/StatsProc_R_2000_h_0.9_self_0.95_f_1e-04_10b_SLIM.dat",
  "Table"][[12]];

```

```
PiRelh09s095S = Partition[Riffle[Partition[Riffle[Rin, PiRelh09s095], 2],
```

```
  Map[ErrorBar, Partition[Riffle[-PiRelh09s095CIB, PiRelh09s095CIT], 2]], 2];
```

```
Ph09s095 = Plot[{{PWR2B[5000, 0.05, 0.9, 0.95, R, Boostp0[5000, 0.05, 0.9, 0.95]],
  ExPiSV[5000, 0.05, 0.9, 0.95,  $\frac{R}{10\,000}$ , Boostp0[5000, 0.05, 0.9, 0.95]]}},
  {R, 0, 2000}, PlotStyle -> {{Blue, Thick, Dashed}}, {Blue, Thick}},
  PlotRange -> {All, {0, 1}}, Frame -> {{True, False}, {True, False}},
  BaseStyle -> {FontWeight -> "Bold", FontColor -> Black, FontSize -> 12}]
```

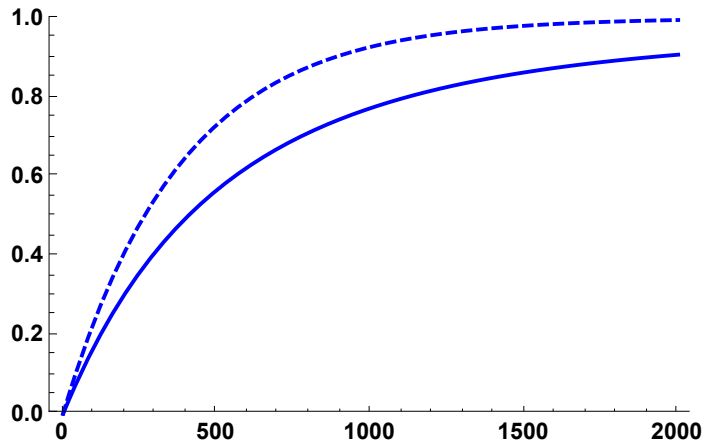

```
Ph09s095A =
  Plot[{{ExPiSV[5000, 0.05, 0.9, 0.95,  $\frac{R}{10\,000}$ , Boostp0[5000, 0.05, 0.9, 0.95]]}},
    {R, 0, 2000}, PlotStyle -> {{Blue, Thick}},
    PlotRange -> {All, {0, 1}}, Frame -> {{True, False}, {True, False}},
    BaseStyle -> {FontWeight -> "Bold", FontColor -> Black, FontSize -> 12}];
```

```
Ph09s095S = ErrorListPlot[PiRelh09s095S,
  PlotStyle -> {Blue, PointSize[0.02]}, PlotRange -> {{0, 2000}, {0, 1}}]
```

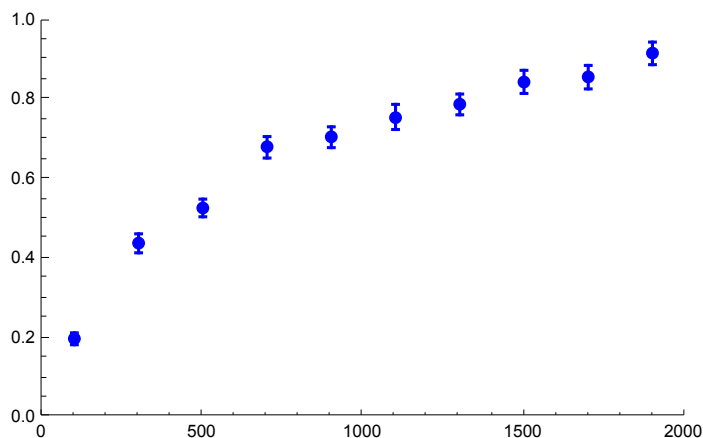

Show[Ph09s095, Ph09s095S]

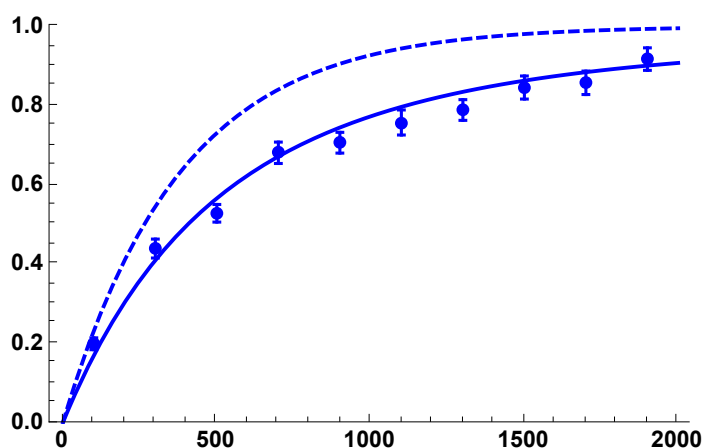

All  $h$  values, using the coalescence-in-sweep-phase results and simulations:

Sims095DN = Show[Ph01s095A, Ph01s095S,  
Ph05s095A, Ph05s095S, Ph09s095A, Ph09s095S, ImageSize → 250]

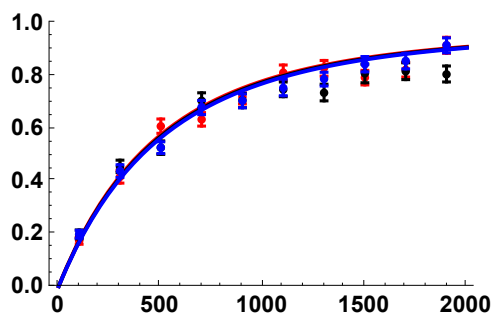

All  $h$  values, using the coalescence-in-sweep-phase results and simulations:

Sims095DN2 = Show[Ph01s095, Ph05s095, Ph09s095, ImageSize → 250]

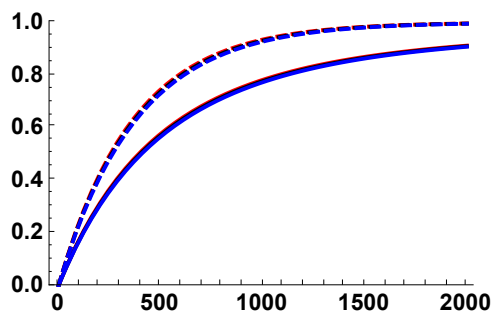

Simulation comparisons,  $p_0 = 0.02$

$h = 0.5$

```

PiRelh05p002s095 =
  Import["SLIM_F09/StatsProc_R_2000_h_0.5_self_0.95_f_0.02_10b_SLIM.dat",
    "Table"][[10]];
PiRelh05p002s095CIB = Import[
  "SLIM_F09/StatsProc_R_2000_h_0.5_self_0.95_f_0.02_10b_SLIM.dat",
  "Table"][[11]];
PiRelh05p002s095CIT = Import[
  "SLIM_F09/StatsProc_R_2000_h_0.5_self_0.95_f_0.02_10b_SLIM.dat",
  "Table"][[12]];
PiRelh05p002s095S = Partition[Riffle[
  Partition[Riffle[Rin, PiRelh05p002s095], 2], Map[ErrorBar,
    Partition[Riffle[-PiRelh05p002s095CIB, PiRelh05p002s095CIT], 2]]], 2];
Ph05p002s095 = Plot[{PWR2B[5000, 0.05, 0.5, 0.95, R, 0.02],
  ExpISV[5000, 0.05, 0.5, 0.95,  $\frac{R}{10000}$ , 0.02]}, {R, 0, 2000},
  PlotStyle → {{Black, Thick, Dashed}, {Black, Thick}},
  PlotRange → All, Frame → {{True, False}, {True, False}},
  BaseStyle → {FontWeight → "Bold", FontColor → Black, FontSize → 12}]

```

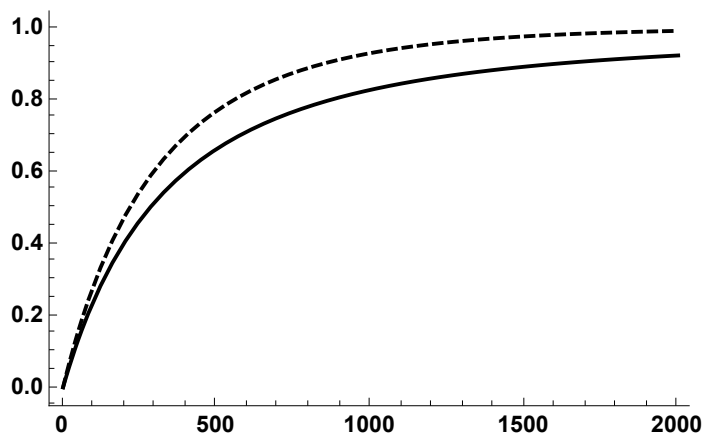

```

Ph05p002s095A = Plot[{ExpISV[5000, 0.05, 0.5, 0.95,  $\frac{R}{10000}$ , 0.02]},
  {R, 0, 2000}, PlotStyle → {{Black, Thick}},
  PlotRange → All, Frame → {{True, False}, {True, False}},
  BaseStyle → {FontWeight → "Bold", FontColor → Black, FontSize → 12}];

```

```
Ph05p002s095S = ErrorListPlot[PiRelh05p002s095S,
  PlotStyle -> {Black, PointSize[0.02]}, PlotRange -> {{0, 2000}, {0, 1.1}}]
```

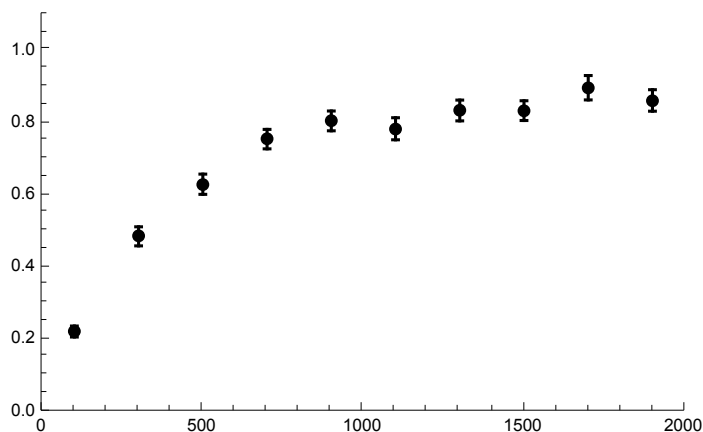

```
Show[Ph05p002s095, Ph05p002s095S]
```

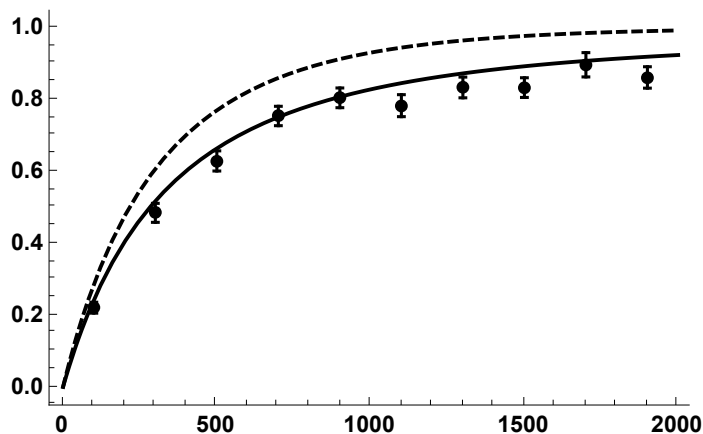

$h = 0.1$

```
PiRelh01p002s095 =
  Import["SLIM_F09/StatsProc_R_2000_h_0.1_self_0.95_f_0.02_10b_SLIM.dat",
    "Table"][[10]];
PiRelh01p002s095CIB = Import[
  "SLIM_F09/StatsProc_R_2000_h_0.1_self_0.95_f_0.02_10b_SLIM.dat",
  "Table"][[11]];
PiRelh01p002s095CIT = Import[
  "SLIM_F09/StatsProc_R_2000_h_0.1_self_0.95_f_0.02_10b_SLIM.dat",
  "Table"][[12]];
PiRelh01p002s095S = Partition[Riffle[
  Partition[Riffle[Rin, PiRelh01p002s095], 2], Map[ErrorBar,
    Partition[Riffle[-PiRelh01p002s095CIB, PiRelh01p002s095CIT], 2]]], 2];
```

```
Ph01p002s095 = Plot[ { PWR2B[5000, 0.05, 0.1, 0.95, R, 0.02],
  ExPiSV[5000, 0.05, 0.1, 0.95,  $\frac{R}{10\,000}$ , 0.02] },
  {R, 0, 2000}, PlotStyle -> {{Red, Thick, Dashed}, {Red, Thick}},
  PlotRange -> All, Frame -> {{True, False}, {True, False}},
  BaseStyle -> {FontWeight -> "Bold", FontColor -> Black, FontSize -> 12} ]
```

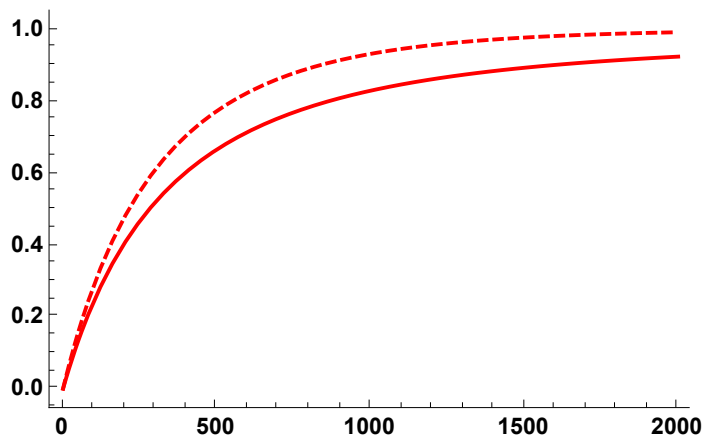

```
Ph01p002s095A = Plot[ { ExPiSV[5000, 0.05, 0.1, 0.95,  $\frac{R}{10\,000}$ , 0.02] },
  {R, 0, 2000}, PlotStyle -> {{Red, Thick}},
  PlotRange -> All, Frame -> {{True, False}, {True, False}},
  BaseStyle -> {FontWeight -> "Bold", FontColor -> Black, FontSize -> 12} ];
```

```
Ph01p002s095S = ErrorListPlot[PiRelh01p002s095S,
  PlotStyle -> {Red, PointSize[0.02]}, PlotRange -> {{0, 2000}, {0, 1.1}}]
```

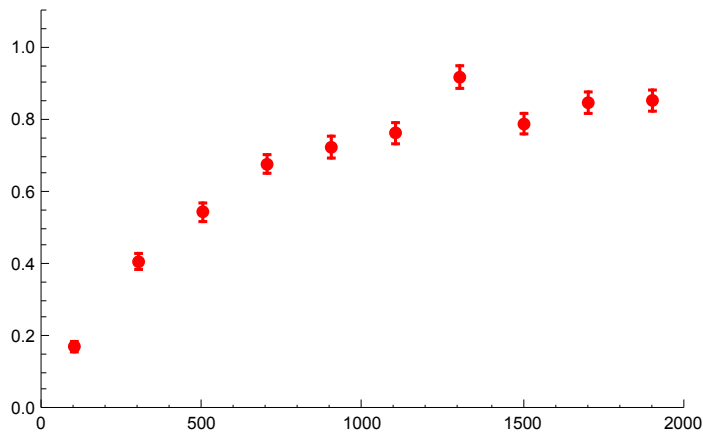

```
Show[Ph01p002s095, Ph01p002s095S]
```

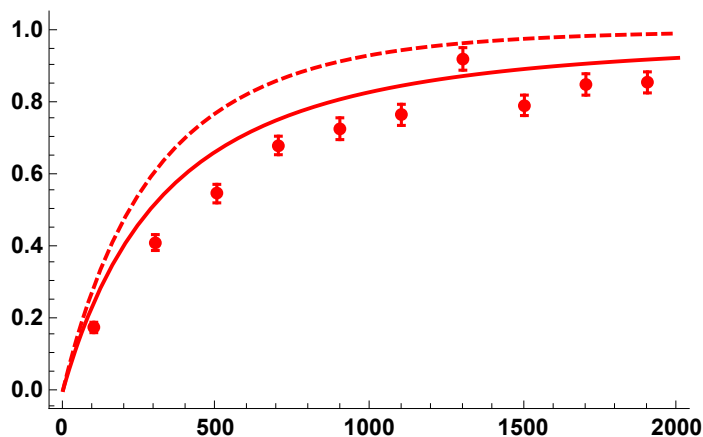

```
h = 0.9
```

```
PiRelh09p002s095 =
```

```
  Import["SLIM_F09/StatsProc_R_2000_h_0.9_self_0.95_f_0.02_10b_SLIM.dat",
    "Table"][[10]];

```

```
PiRelh09p002s095CIB = Import[
```

```
  "SLIM_F09/StatsProc_R_2000_h_0.9_self_0.95_f_0.02_10b_SLIM.dat",
  "Table"][[11]];

```

```
PiRelh09p002s095CIT = Import[
```

```
  "SLIM_F09/StatsProc_R_2000_h_0.9_self_0.95_f_0.02_10b_SLIM.dat",
  "Table"][[12]];

```

```
PiRelh09p002s095S = Partition[Riffle[
```

```
  Partition[Riffle[Rin, PiRelh09p002s095], 2], Map[ErrorBar,
  Partition[Riffle[-PiRelh09p002s095CIB, PiRelh09p002s095CIT], 2]], 2];

```

```
Ph09p002s095 = Plot[{PWR2B[5000, 0.05, 0.9, 0.95, R, 0.02],
```

```
  ExpISV[5000, 0.05, 0.9, 0.95,  $\frac{R}{10000}$ , 0.02]}],
```

```
{R, 0, 2000}, PlotStyle → {{Blue, Thick, Dashed}, {Blue, Thick}},
```

```
PlotRange → All, Frame → {{True, False}, {True, False}},
```

```
BaseStyle → {FontWeight → "Bold", FontColor → Black, FontSize → 12}]
```

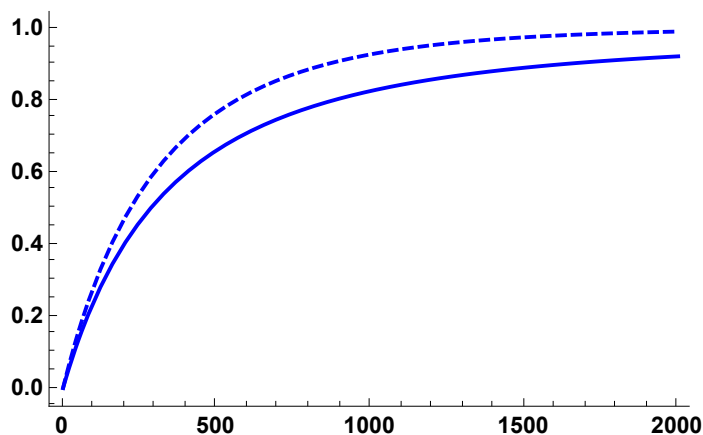



```

Ph09p002s095A = Plot[ {ExpISV[5000, 0.05, 0.9, 0.95,  $\frac{R}{10\,000}$ , 0.02]},
  {R, 0, 2000}, PlotStyle -> { {Blue, Thick}},
  PlotRange -> All, Frame -> {{True, False}, {True, False}},
  BaseStyle -> {FontWeight -> "Bold", FontColor -> Black, FontSize -> 12}];

Ph09p002s095S = ErrorListPlot[PiRelh09p002s095S,
  PlotStyle -> {Blue, PointSize[0.02]}, PlotRange -> {{0, 2000}, {0, 1.1}}]

```

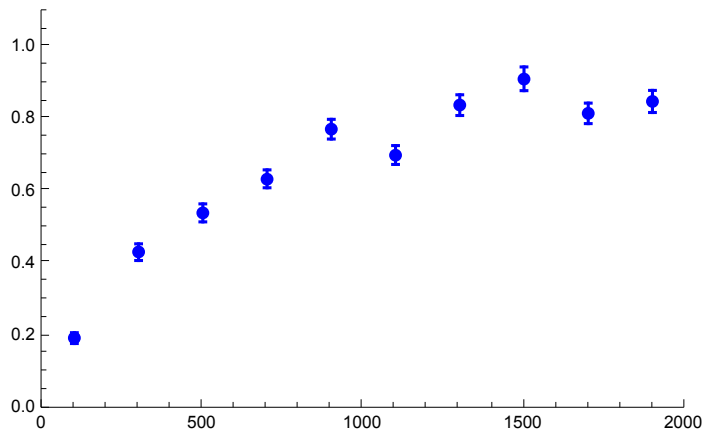

```
Show[Ph09p002s095, Ph09p002s095S]
```

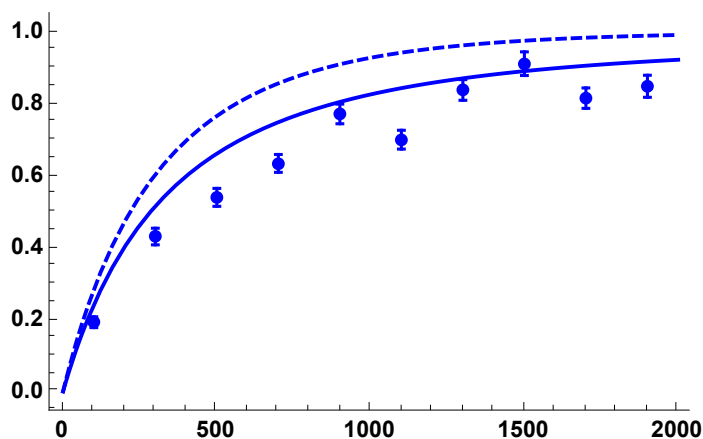

All h values, using the coalescence-in-sweep-phase results and simulations:

```

Sims0952pc = Show[Ph01p002s095A, Ph01p002s095S, Ph05p002s095A,
  Ph05p002s095S, Ph09p002s095A, Ph09p002s095S, ImageSize -> 250]

```

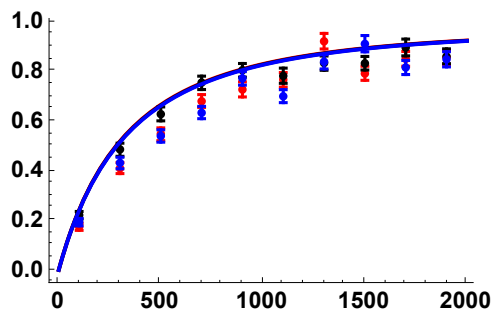

All h values, using the coalescence-in-sweep-phase results and simulations:

```
Sims0952pc2 = Show[Ph01p002s095, Ph05p002s095, Ph09p002s095, ImageSize → 250]
```

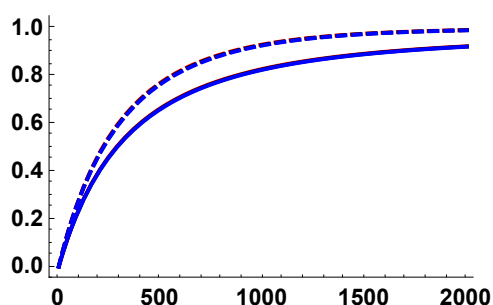

## Simulation comparisons, $p_0 = 0.05$

$h = 0.5$

```
PiRelh05p005s095 =
  Import["SLIM_F09/StatsProc_R_2000_h_0.5_self_0.95_f_0.05_10b_SLIM.dat",
    "Table"][[10]];
PiRelh05p005s095CIB = Import[
  "SLIM_F09/StatsProc_R_2000_h_0.5_self_0.95_f_0.05_10b_SLIM.dat",
  "Table"][[11]];
PiRelh05p005s095CIT = Import[
  "SLIM_F09/StatsProc_R_2000_h_0.5_self_0.95_f_0.05_10b_SLIM.dat",
  "Table"][[12]];
PiRelh05p005s095S = Partition[Riffle[
  Partition[Riffle[Rin, PiRelh05p005s095], 2], Map[ErrorBar,
    Partition[Riffle[-PiRelh05p005s095CIB, PiRelh05p005s095CIT], 2]]], 2];
Ph05p005s095 = Plot[{PWR2B[5000, 0.05, 0.5, 0.95, R, 0.05],
  ExpISV[5000, 0.05, 0.5, 0.95,  $\frac{R}{10000}$ , 0.05]}, {R, 0, 2000},
  PlotStyle → {{Black, Thick, Dashed}, {Black, Thick}},
  PlotRange → {All, {0, 1.1}},
  BaseStyle → {FontWeight → "Bold", FontColor → Black, FontSize → 12}]
```

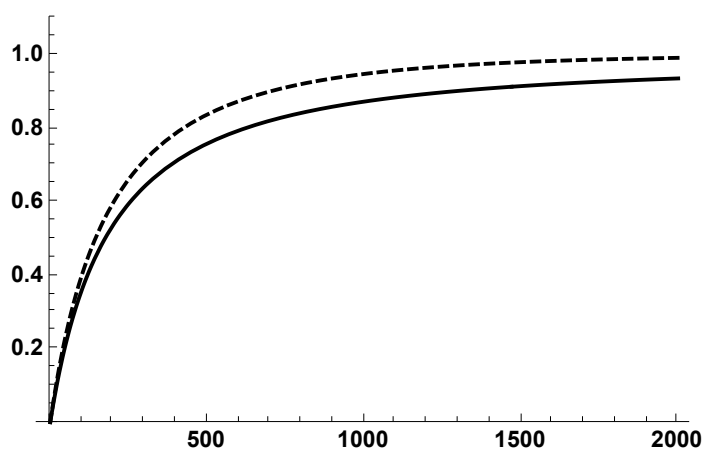

```
Ph05p005s095A = Plot[ {ExpISV[5000, 0.05, 0.5, 0.95,  $\frac{R}{10\,000}$ , 0.05]},
  {R, 0, 2000}, PlotStyle -> {{Black, Thick}},
  PlotRange -> {All, {0, 1.1}}, Frame -> {{True, False}, {True, False}},
  BaseStyle -> {FontWeight -> "Bold", FontColor -> Black, FontSize -> 12}];
```

```
Ph05p005s095S = ErrorListPlot[PiRelh05p005s095S,
  PlotStyle -> {Black, PointSize[0.02]}, PlotRange -> {{0, 2000}, {0, 1.1}}]
```

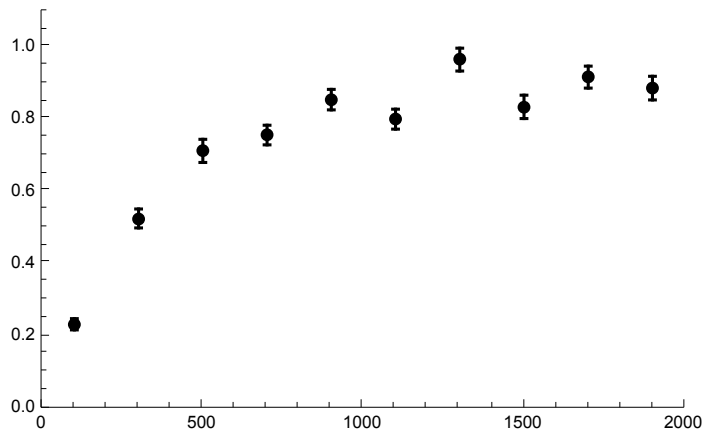

```
Show[Ph05p005s095, Ph05p005s095S]
```

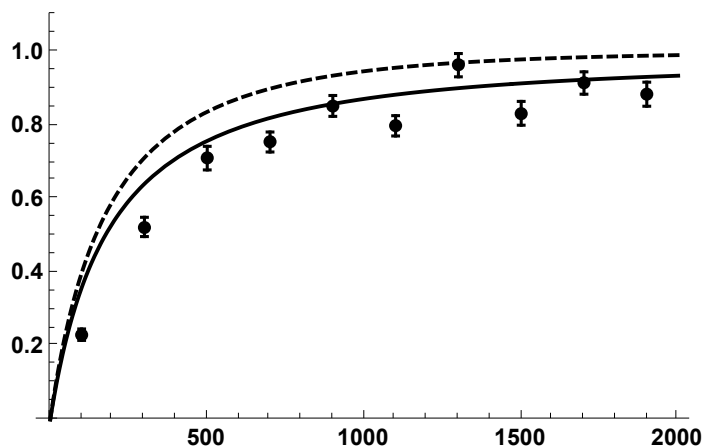

```
h = 0.1
```

```
PiRelh01p005s095 =
  Import["SLIM_F09/StatsProc_R_2000_h_0.1_self_0.95_f_0.05_10b_SLIM.dat",
    "Table"][[10]];
PiRelh01p005s095CIB = Import[
  "SLIM_F09/StatsProc_R_2000_h_0.1_self_0.95_f_0.05_10b_SLIM.dat",
  "Table"][[11]];
PiRelh01p005s095CIT = Import[
  "SLIM_F09/StatsProc_R_2000_h_0.1_self_0.95_f_0.05_10b_SLIM.dat",
  "Table"][[12]];
PiRelh01p005s095S = Partition[Riffle[
  Partition[Riffle[Rin, PiRelh01p005s095], 2], Map[ErrorBar,
    Partition[Riffle[-PiRelh01p005s095CIB, PiRelh01p005s095CIT], 2]]], 2];
```

```
Ph01p005s095 = Plot[ { PWR2B[5000, 0.05, 0.1, 0.95, R, 0.05],
  ExPiSV[5000, 0.05, 0.1, 0.95,  $\frac{R}{10\,000}$ , 0.05] },
  {R, 0, 2000}, PlotStyle -> {{Red, Thick, Dashed}, {Red, Thick}},
  PlotRange -> All, Frame -> {{True, False}, {True, False}},
  BaseStyle -> {FontWeight -> "Bold", FontColor -> Black, FontSize -> 12} ]
```

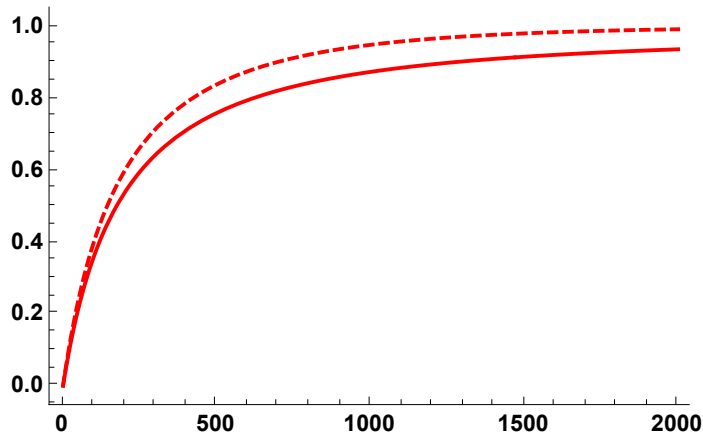

```
Ph01p005s095A = Plot[ { ExPiSV[5000, 0.05, 0.1, 0.95,  $\frac{R}{10\,000}$ , 0.05] },
  {R, 0, 2000}, PlotStyle -> {{Red, Thick}},
  PlotRange -> All, Frame -> {{True, False}, {True, False}},
  BaseStyle -> {FontWeight -> "Bold", FontColor -> Black, FontSize -> 12} ];
```

```
Ph01p005s095S = ErrorListPlot[PiRelh01p005s095S,
  PlotStyle -> {Red, PointSize[0.02]}, PlotRange -> {{0, 2000}, {0, 1.1}}]
```

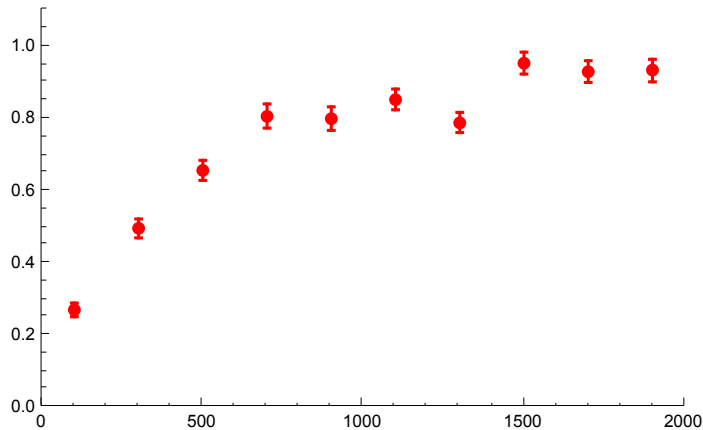

```
Show[Ph01p005s095, Ph01p005s095S]
```

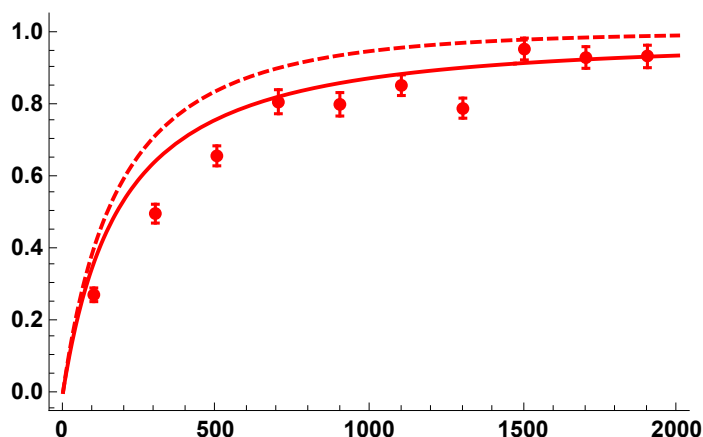

```
h = 0.9
```

```
PiRelh09p005s095 =
```

```
  Import["SLIM_F09/StatsProc_R_2000_h_0.9_self_0.95_f_0.05_10b_SLIM.dat",
    "Table"][[10]];

```

```
PiRelh09p005s095CIB = Import[
```

```
  "SLIM_F09/StatsProc_R_2000_h_0.9_self_0.95_f_0.05_10b_SLIM.dat",
  "Table"][[11]];

```

```
PiRelh09p005s095CIT = Import[
```

```
  "SLIM_F09/StatsProc_R_2000_h_0.9_self_0.95_f_0.05_10b_SLIM.dat",
  "Table"][[12]];

```

```
PiRelh09p005s095S = Partition[Riffle[
```

```
  Partition[Riffle[Rin, PiRelh09p005s095], 2], Map[ErrorBar,
  Partition[Riffle[-PiRelh09p005s095CIB, PiRelh09p005s095CIT], 2]], 2];

```

```
Ph09p005s095 = Plot[{PWR2B[5000, 0.05, 0.9, 0.95, R, 0.05],
```

```
  ExpISV[5000, 0.05, 0.9, 0.95,  $\frac{R}{10\,000}$ , 0.05]}],
```

```
{R, 0, 2000}, PlotStyle → {{Blue, Thick, Dashed}, {Blue, Thick}},
```

```
PlotRange → All, Frame → {{True, False}, {True, False}},
```

```
BaseStyle → {FontWeight → "Bold", FontColor → Black, FontSize → 12}]
```

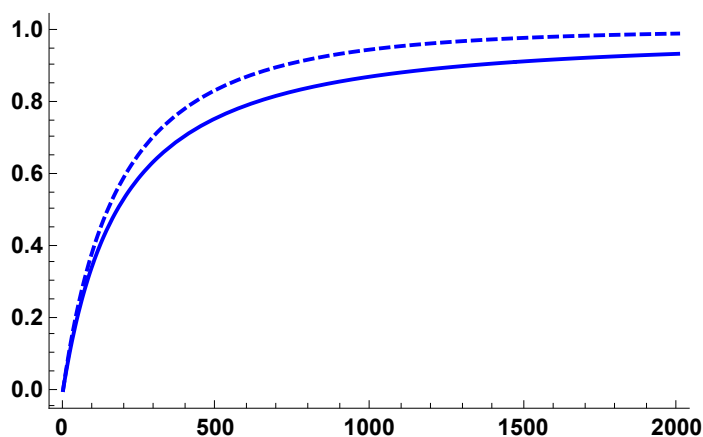

```

Ph09p005s095A = Plot[ {ExpISV[5000, 0.05, 0.9, 0.95,  $\frac{R}{10\,000}$ , 0.05]},
  {R, 0, 2000}, PlotStyle -> {{Blue, Thick}},
  PlotRange -> All, Frame -> {{True, False}, {True, False}},
  BaseStyle -> {FontWeight -> "Bold", FontColor -> Black, FontSize -> 12}];

Ph09p005s095S = ErrorListPlot[PiRelh09p005s095S,
  PlotStyle -> {Blue, PointSize[0.02]}, PlotRange -> {{0, 2000}, {0, 1.1}}]

```

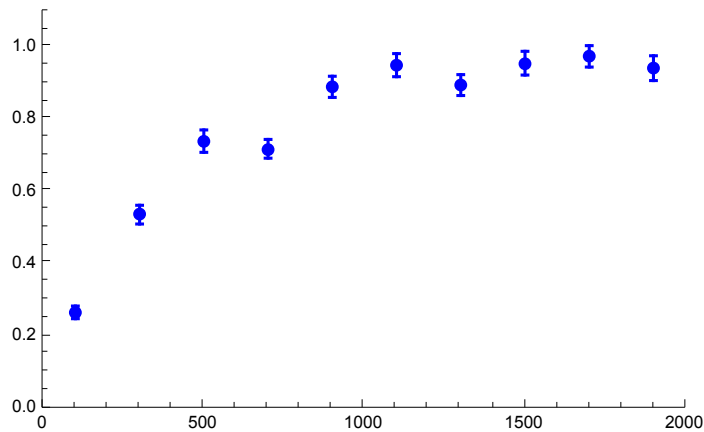

```
Show[Ph09p005s095, Ph09p005s095S]
```

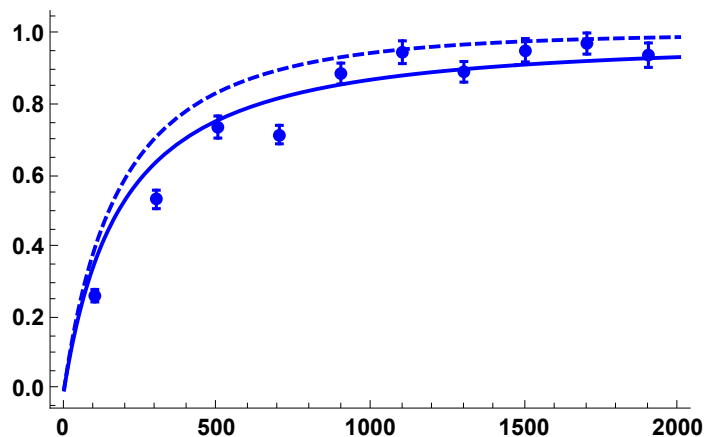

All h values, using the coalescence-in-sweep-phase results and simulations:

```

Sims0955pc = Show[Ph01p005s095A, Ph01p005s095S, Ph05p005s095A,
  Ph05p005s095S, Ph09p005s095A, Ph09p005s095S, ImageSize -> 250]

```

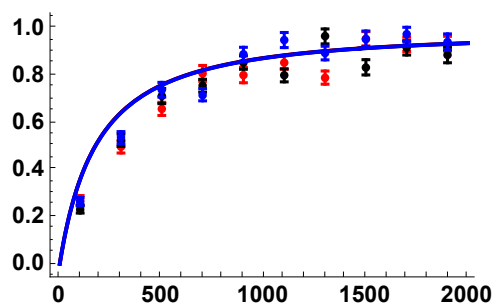

All h values, using the coalescence-in-sweep-phase results and simulations:

```
Sims0955pc2 = Show[Ph01p005s095, Ph05p005s095, Ph09p005s095, ImageSize → 250]
```

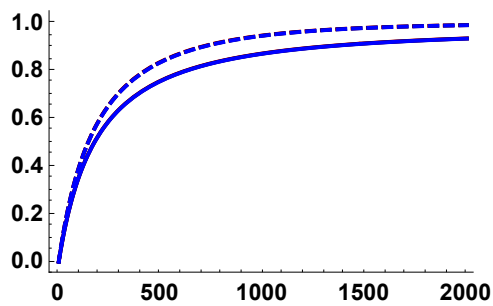

## Plots of sweep trajectories

Function to numerically evaluate trajectories

```
PSolve[Na_, σ_, s_, h_, tmax_, pin_] :=  
  NDSolve[{p'[t] == (1 - p[t]) p[t] s ((F[σ] + h - F[σ] h + (1 - F[σ]) (1 - 2 h) p[t])),  
    p[0] == pin}, p[t], {t, 0, tmax}]
```

$$\text{Boostp0}[Na_, s_, h_, \sigma_] := \frac{1 + F[\sigma]}{4 Na s (F[\sigma] + h - F[\sigma] h)}$$

In the following plots, x-axis is the time (number of generations) and y-axis is the selected allele frequency.

$\sigma = 0, f_0 = 1/2 N$

```
p1h01 = Plot[  
  Evaluate[p[t] /. PSolve[5000, 0, 0.05, 0.1, 800, Boostp0[5000, 0.05, 0.1, 0]]],  
  {t, 0, 800}, PlotStyle → {Red, Thick}, PlotRange → Full, AxesOrigin → {0, 0},  
  BaseStyle → {FontWeight → "Bold", FontColor → Black, FontSize → 12}]
```

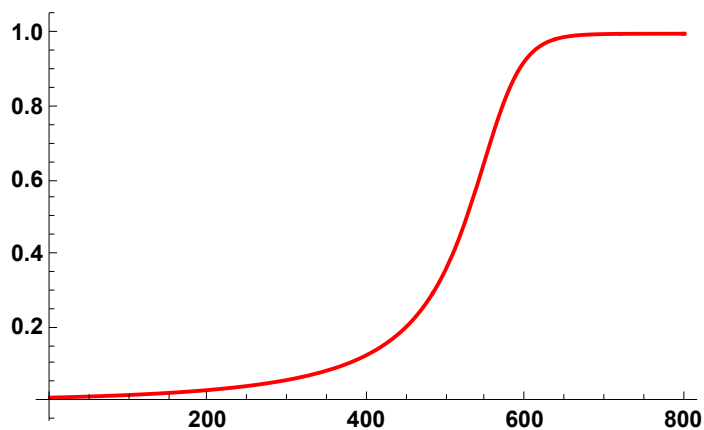

```
p1h05 = Plot[
  Evaluate[p[t] /. PSolve[5000, 0, 0.05, 0.5, 800, Boostp0[5000, 0.05, 0.5, 0]]],
  {t, 0, 800}, PlotStyle -> {Black, Thick}, AxesOrigin -> {0, 0},
  BaseStyle -> {FontWeight -> "Bold", FontColor -> Black, FontSize -> 12}]
```

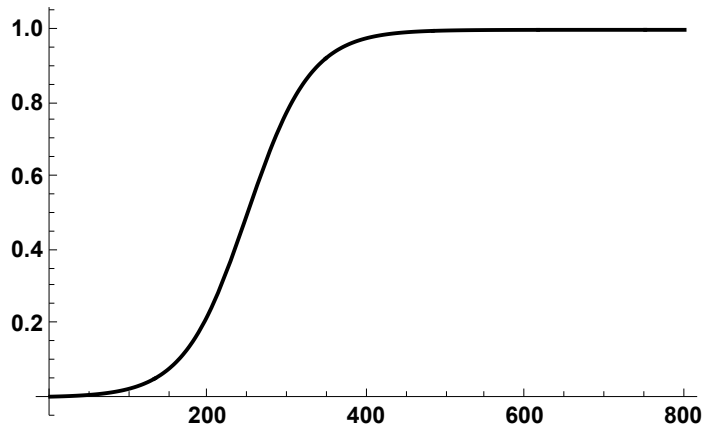

```
p1h09 = Plot[
  Evaluate[p[t] /. PSolve[5000, 0, 0.05, 0.9, 800, Boostp0[5000, 0.05, 0.9, 0]]],
  {t, 0, 800}, PlotStyle -> {Blue, Thick}, AxesOrigin -> {0, 0},
  BaseStyle -> {FontWeight -> "Bold", FontColor -> Black, FontSize -> 12}]
```

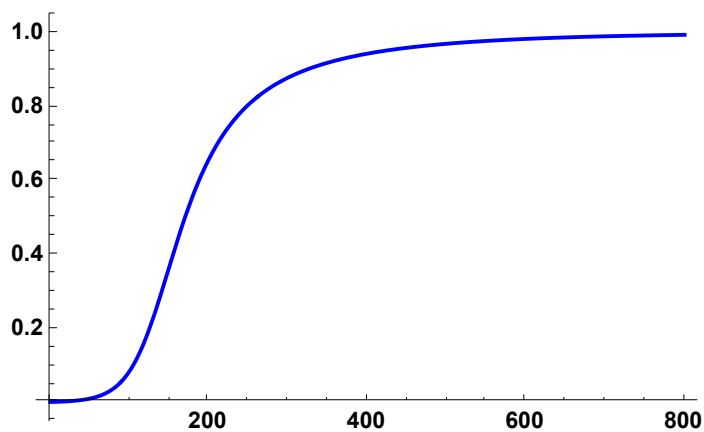

Composite plot

```
Trajs0DN = Show[p1h01, p1h05, p1h09, ImageSize -> 250]
```

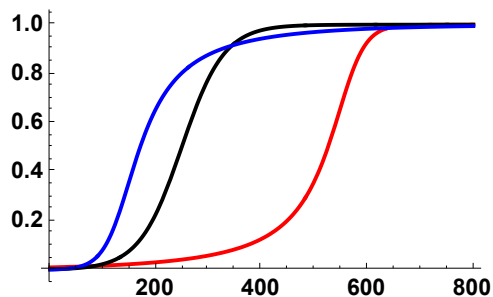



$\sigma = 0, f_0 = 0.02$

```
p1h01p02 = Plot[Evaluate[p[t] /. PSolve[5000, 0, 0.05, 0.1, 600, 0.02]],
  {t, 0, 600}, PlotStyle -> {Red, Thick}, PlotRange -> Full, AxesOrigin -> {0, 0},
  BaseStyle -> {FontWeight -> "Bold", FontColor -> Black, FontSize -> 12}]
```

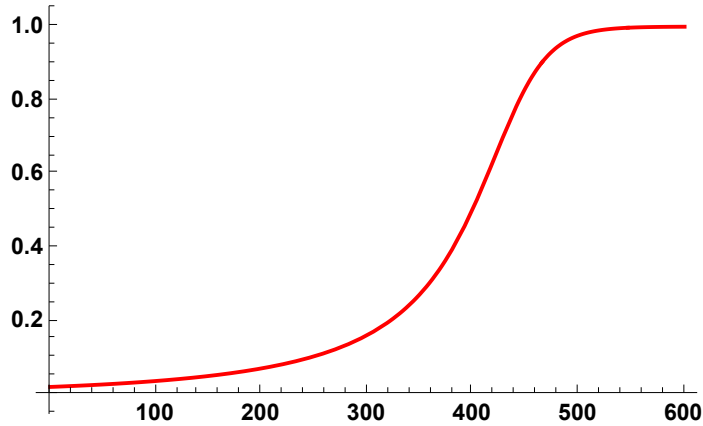

```
p1h05p02 = Plot[Evaluate[p[t] /. PSolve[5000, 0, 0.05, 0.5, 600, 0.02]],
  {t, 0, 600}, PlotStyle -> {Black, Thick}, AxesOrigin -> {0, 0},
  BaseStyle -> {FontWeight -> "Bold", FontColor -> Black, FontSize -> 12}]
```

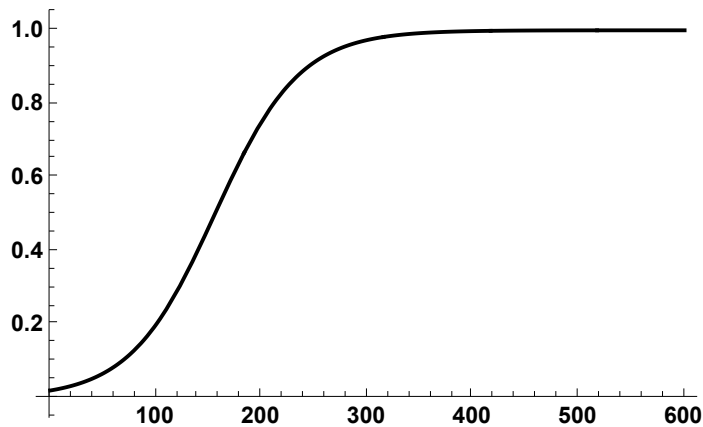

```
p1h09p02 = Plot[Evaluate[p[t] /. PSolve[5000, 0, 0.05, 0.9, 600, 0.02]],
  {t, 0, 600}, PlotStyle -> {Blue, Thick}, AxesOrigin -> {0, 0},
  BaseStyle -> {FontWeight -> "Bold", FontColor -> Black, FontSize -> 12}]
```

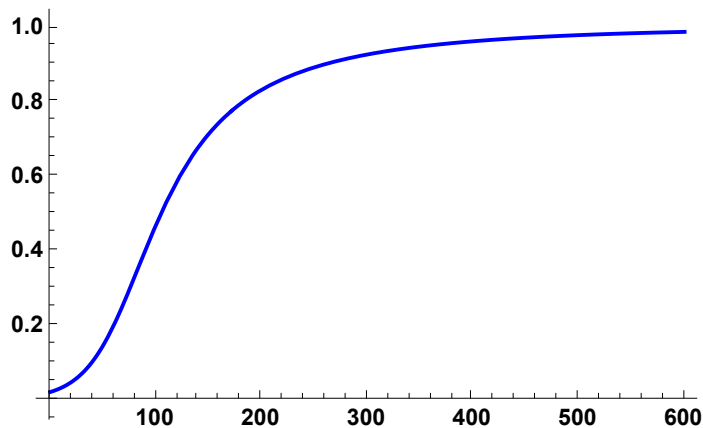

Composite plot

```
Trajs02pc = Show[p1h01p02, p1h05p02, p1h09p02, ImageSize → 250]
```

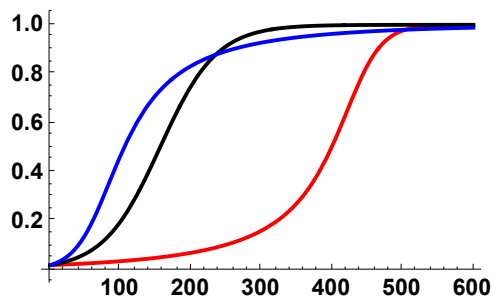

$\sigma = 0, f_0 = 0.05$

```
p1h01p05 = Plot[Evaluate[p[t] /. PSolve[5000, 0, 0.05, 0.1, 500, 0.05]],  
  {t, 0, 500}, PlotStyle → {Red, Thick}, PlotRange → Full, AxesOrigin → {0, 0},  
  BaseStyle → {FontWeight → "Bold", FontColor → Black, FontSize → 12}]
```

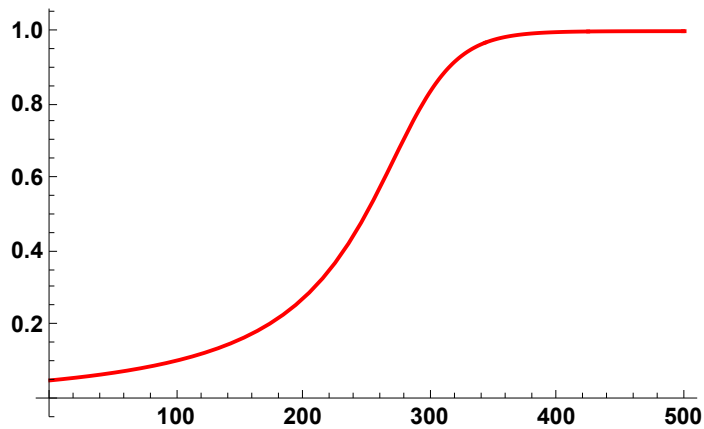

```
p1h05p05 = Plot[Evaluate[p[t] /. PSolve[5000, 0, 0.05, 0.5, 500, 0.05]],  
  {t, 0, 500}, PlotStyle → {Black, Thick}, AxesOrigin → {0, 0},  
  BaseStyle → {FontWeight → "Bold", FontColor → Black, FontSize → 12}]
```

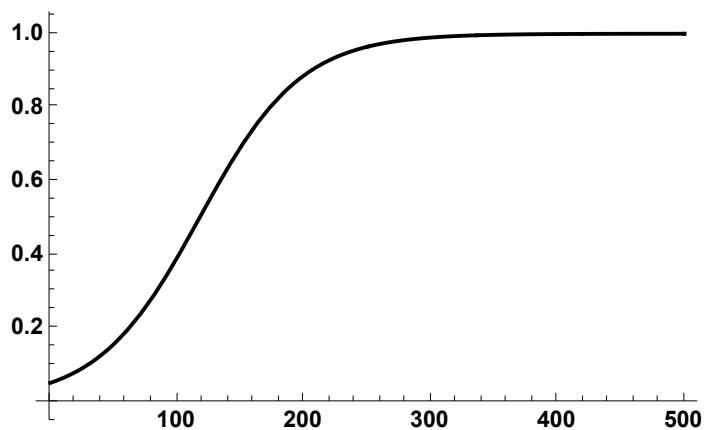

```
p1h09p05 = Plot[Evaluate[p[t] /. PSolve[5000, 0, 0.05, 0.9, 500, 0.05]],
  {t, 0, 500}, PlotStyle -> {Blue, Thick}, AxesOrigin -> {0, 0},
  BaseStyle -> {FontWeight -> "Bold", FontColor -> Black, FontSize -> 12}]
```

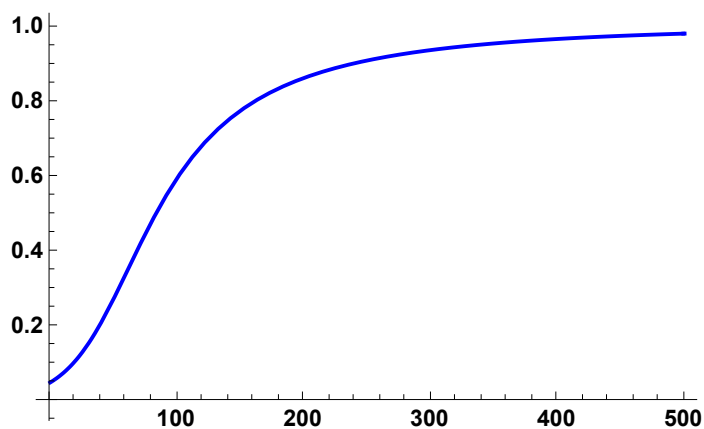

Composite plot

```
Trajs05pc = Show[p1h01p05, p1h05p05, p1h09p05, ImageSize -> 250]
```

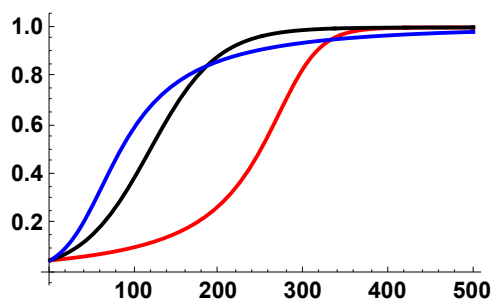

$\sigma = 0.50, f_0 = 1/2 N$

```
p2h01 = Plot[Evaluate[
  p[t] /. PSolve[5000, 0.5, 0.05, 0.1, 400, Boostp0[5000, 0.05, 0.1, 0.5]]],
  {t, 0, 400}, PlotStyle -> {Red, Thick}, PlotRange -> Full, AxesOrigin -> {0, 0},
  BaseStyle -> {FontWeight -> "Bold", FontColor -> Black, FontSize -> 12}]
```

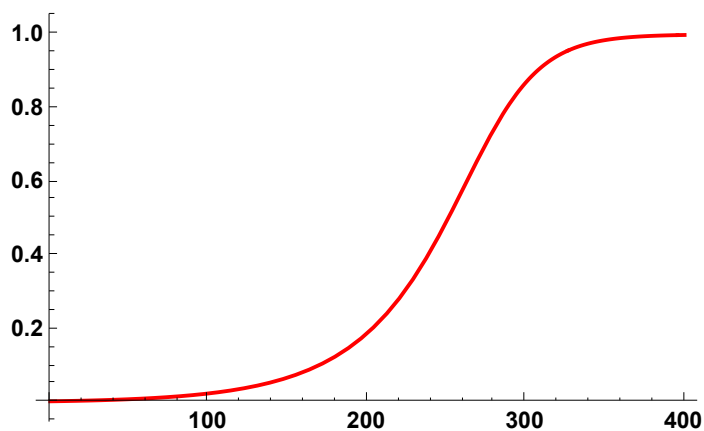

```
p2h05 = Plot[Evaluate[
  p[t] /. PSolve[5000, 0.5, 0.05, 0.5, 400, Boostp0[5000, 0.05, 0.5, 0.5]]],
  {t, 0, 400}, PlotStyle -> {Black, Thick}, AxesOrigin -> {0, 0},
  BaseStyle -> {FontWeight -> "Bold", FontColor -> Black, FontSize -> 12}]
```

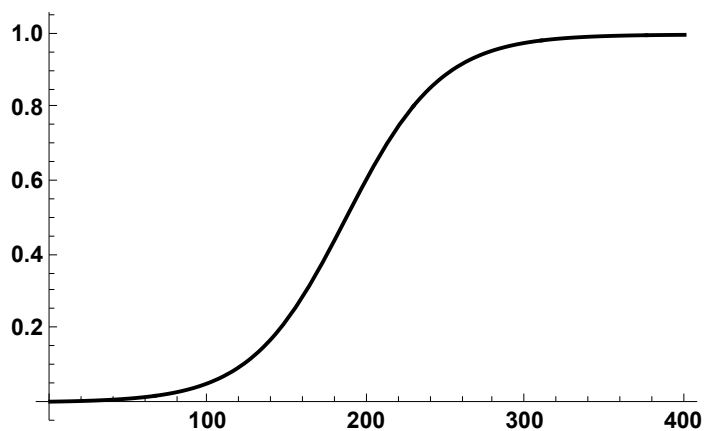

```
p2h09 = Plot[Evaluate[
  p[t] /. PSolve[5000, 0.5, 0.05, 0.9, 400, Boostp0[5000, 0.05, 0.9, 0.5]]],
  {t, 0, 400}, PlotStyle -> {Blue, Thick}, AxesOrigin -> {0, 0},
  BaseStyle -> {FontWeight -> "Bold", FontColor -> Black, FontSize -> 12}]
```

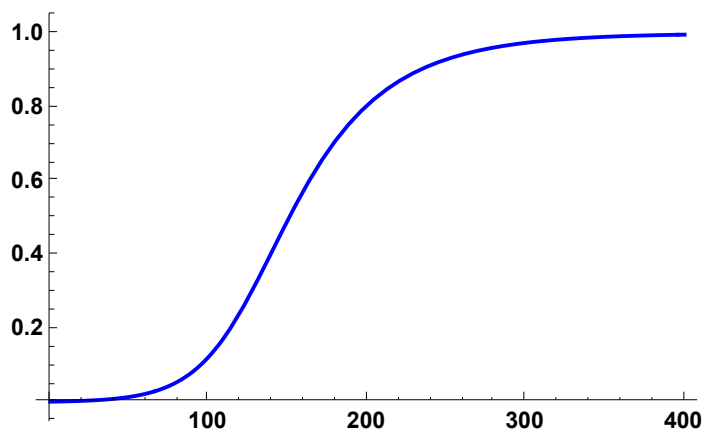

Composite plot

```
Trajs05DN = Show[p2h01, p2h05, p2h09, ImageSize -> 250]
```

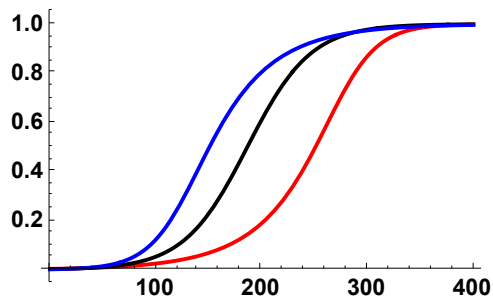

$$\sigma = 0.50, f_0 = 0.02$$

```
p2h01p02 = Plot[Evaluate[p[t] /. PSolve[5000, 0.5, 0.05, 0.1, 400, 0.02]],
  {t, 0, 400}, PlotStyle -> {Red, Thick}, PlotRange -> Full, AxesOrigin -> {0, 0},
  BaseStyle -> {FontWeight -> "Bold", FontColor -> Black, FontSize -> 12}]
```

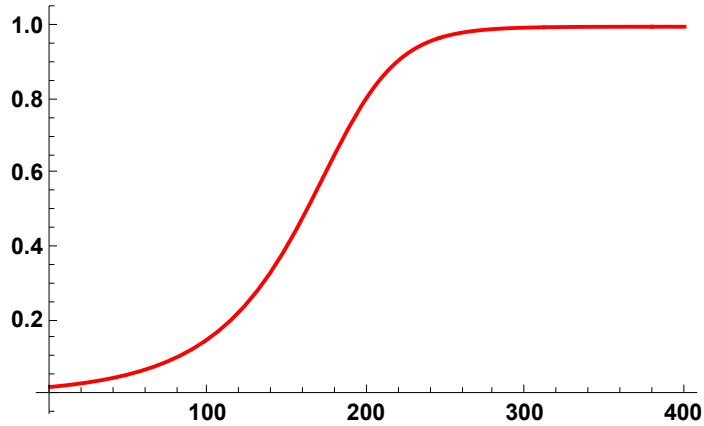

```
p2h05p02 = Plot[Evaluate[p[t] /. PSolve[5000, 0.5, 0.05, 0.5, 400, 0.02]],
  {t, 0, 400}, PlotStyle -> {Black, Thick}, AxesOrigin -> {0, 0},
  BaseStyle -> {FontWeight -> "Bold", FontColor -> Black, FontSize -> 12}]
```

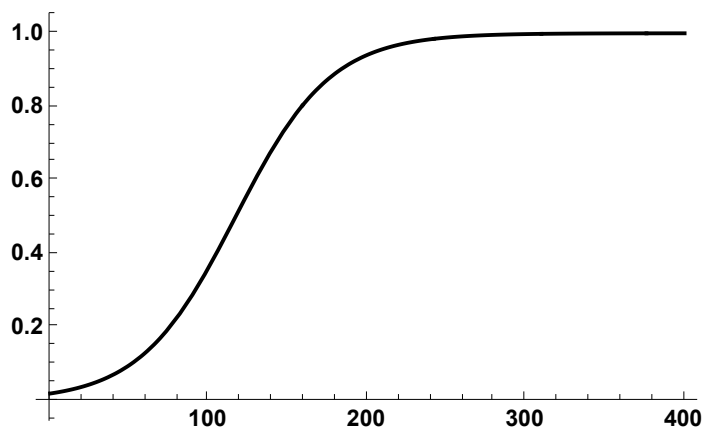

```
p2h09p02 = Plot[Evaluate[p[t] /. PSolve[5000, 0.5, 0.05, 0.9, 400, 0.02]],
  {t, 0, 400}, PlotStyle -> {Blue, Thick}, AxesOrigin -> {0, 0},
  BaseStyle -> {FontWeight -> "Bold", FontColor -> Black, FontSize -> 12}]
```

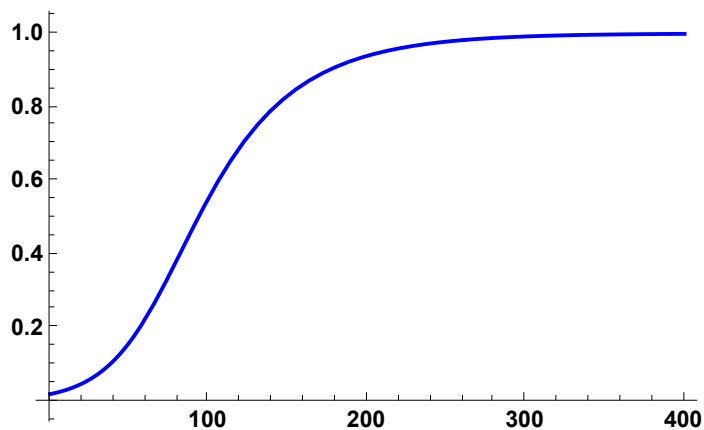

Composite plot

```
Trajs052pc = Show[p2h01p02, p2h05p02, p2h09p02, ImageSize → 250]
```

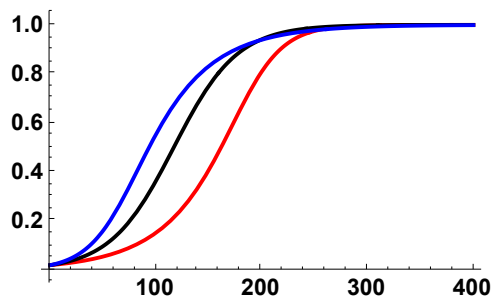

$\sigma = 0.50, f_0 = 0.05$

```
p2h01p05 = Plot[Evaluate[p[t] /. PSolve[5000, 0.5, 0.05, 0.1, 400, 0.05]],  
  {t, 0, 300}, PlotStyle → {Red, Thick}, PlotRange → Full, AxesOrigin → {0, 0},  
  BaseStyle → {FontWeight → "Bold", FontColor → Black, FontSize → 12}]
```

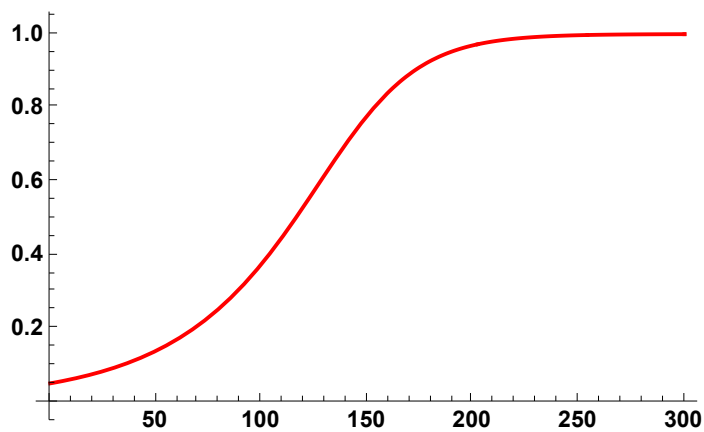

```
p2h05p05 = Plot[Evaluate[p[t] /. PSolve[5000, 0.5, 0.05, 0.5, 400, 0.05]],  
  {t, 0, 300}, PlotStyle → {Black, Thick}, AxesOrigin → {0, 0},  
  BaseStyle → {FontWeight → "Bold", FontColor → Black, FontSize → 12}]
```

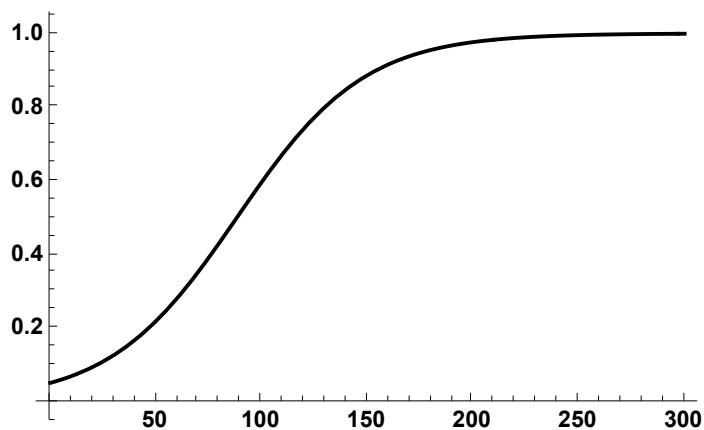

```
p2h09p05 = Plot[Evaluate[p[t] /. PSolve[5000, 0.5, 0.05, 0.9, 400, 0.05]],
  {t, 0, 300}, PlotStyle → {Blue, Thick}, AxesOrigin → {0, 0},
  BaseStyle → {FontWeight → "Bold", FontColor → Black, FontSize → 12}]
```

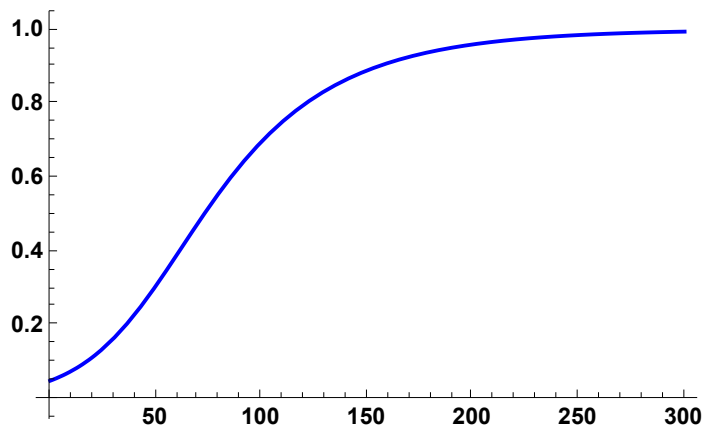

Composite plot

```
Trajs055pc = Show[p2h01p05, p2h05p05, p2h09p05, ImageSize → 250]
```

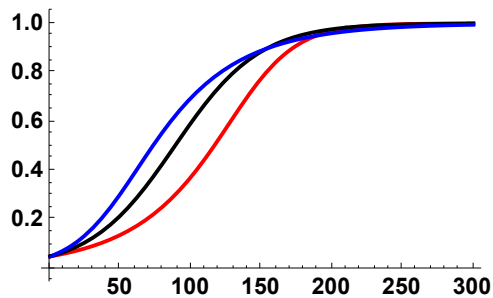

$\sigma = 0.95, f_0 = 1/2 N$

```
p3h01 = Plot[Evaluate[
  p[t] /. PSolve[5000, 0.95, 0.05, 0.1, 300, Boostp0[5000, 0.05, 0.1, 0.95]]],
  {t, 0, 300}, PlotStyle → {Red, Thick}, PlotRange → Full, AxesOrigin → {0, 0},
  BaseStyle → {FontWeight → "Bold", FontColor → Black, FontSize → 12}]
```

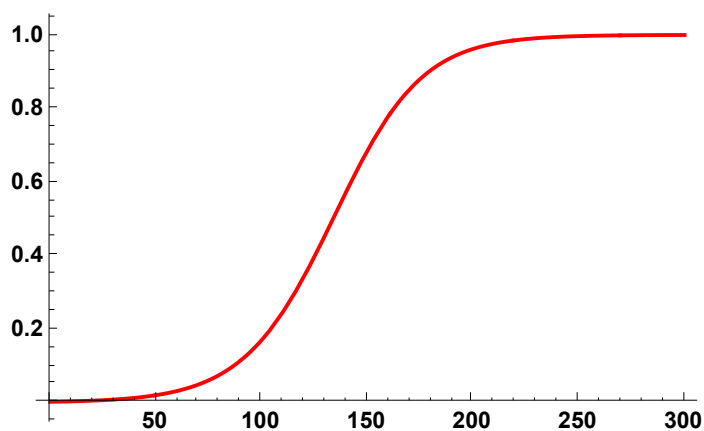

```
p3h05 = Plot[Evaluate[
  p[t] /. PSolve[5000, 0.95, 0.05, 0.5, 300, Boostp0[5000, 0.05, 0.5, 0.95]]],
  {t, 0, 300}, PlotStyle -> {Black, Thick}, AxesOrigin -> {0, 0},
  BaseStyle -> {FontWeight -> "Bold", FontColor -> Black, FontSize -> 12}]
```

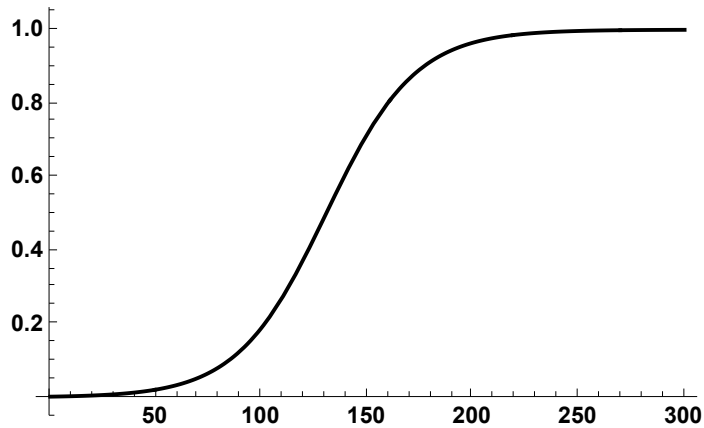

```
p3h09 = Plot[Evaluate[
  p[t] /. PSolve[5000, 0.95, 0.05, 0.9, 300, Boostp0[5000, 0.05, 0.9, 0.95]]],
  {t, 0, 300}, PlotStyle -> {Blue, Thick}, AxesOrigin -> {0, 0},
  BaseStyle -> {FontWeight -> "Bold", FontColor -> Black, FontSize -> 12}]
```

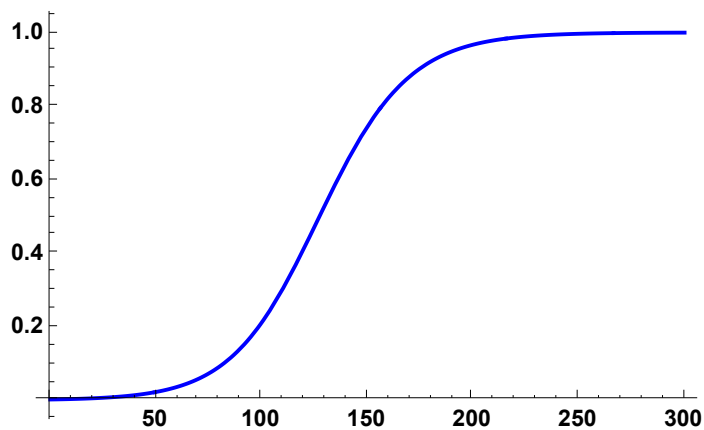

Composite plot

```
Trajs095DN = Show[p3h01, p3h05, p3h09, ImageSize -> 250]
```

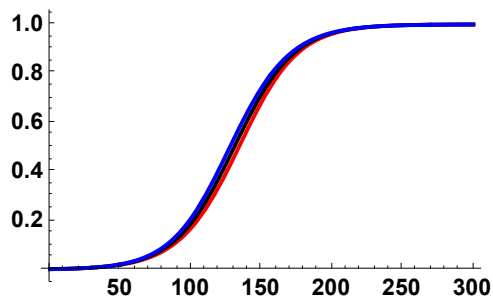



$$\sigma = 0.95, f_0 = 0.02$$

```
p3h01p02 = Plot[Evaluate[p[t] /. PSolve[5000, 0.95, 0.05, 0.1, 400, 0.02]],
  {t, 0, 200}, PlotStyle -> {Red, Thick}, PlotRange -> Full, AxesOrigin -> {0, 0},
  BaseStyle -> {FontWeight -> "Bold", FontColor -> Black, FontSize -> 12}]
```

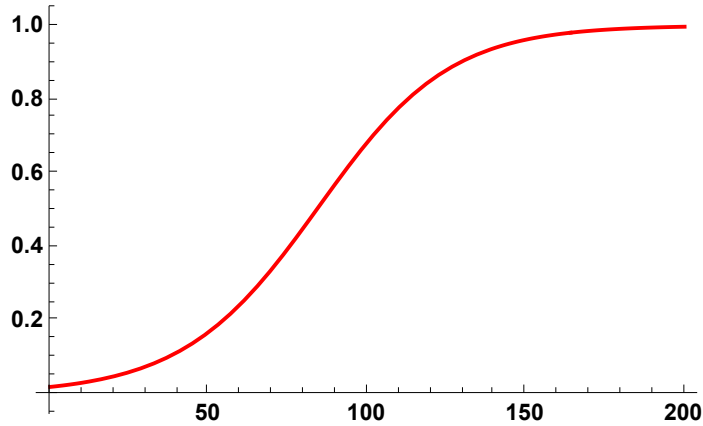

```
p3h05p02 = Plot[Evaluate[p[t] /. PSolve[5000, 0.95, 0.05, 0.5, 400, 0.02]],
  {t, 0, 200}, PlotStyle -> {Black, Thick}, AxesOrigin -> {0, 0},
  BaseStyle -> {FontWeight -> "Bold", FontColor -> Black, FontSize -> 12}]
```

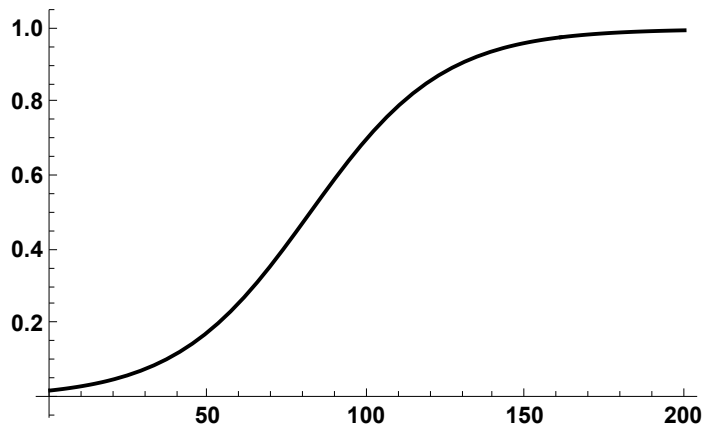

```
p3h09p02 = Plot[Evaluate[p[t] /. PSolve[5000, 0.95, 0.05, 0.9, 400, 0.02]],
  {t, 0, 200}, PlotStyle -> {Blue, Thick}, AxesOrigin -> {0, 0},
  BaseStyle -> {FontWeight -> "Bold", FontColor -> Black, FontSize -> 12}]
```

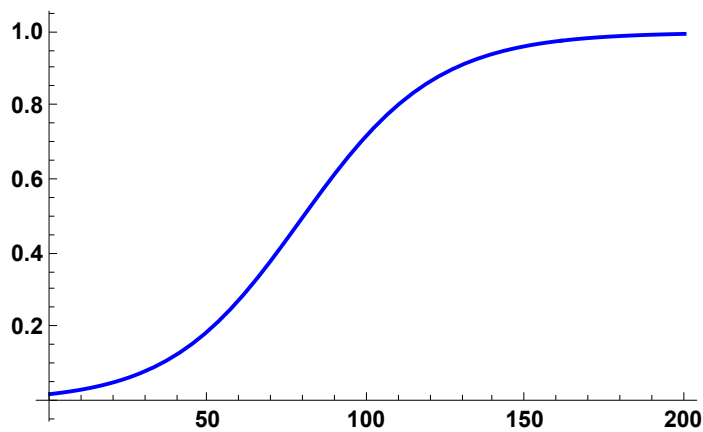

Composite plot

```
Trajs0952pc = Show[p3h01p02, p3h05p02, p3h09p02, ImageSize → 250]
```

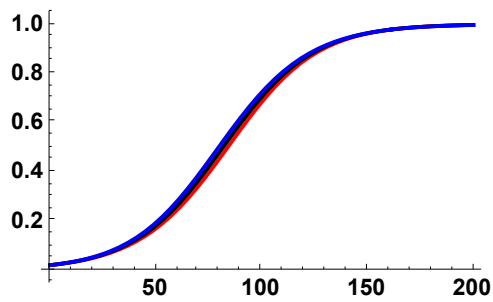

$\sigma = 0.95, f_0 = 0.05$

```
p3h01p05 = Plot[Evaluate[p[t] /. PSolve[5000, 0.95, 0.05, 0.1, 400, 0.05]],  
  {t, 0, 200}, PlotStyle → {Red, Thick}, PlotRange → Full, AxesOrigin → {0, 0},  
  BaseStyle → {FontWeight → "Bold", FontColor → Black, FontSize → 12}]
```

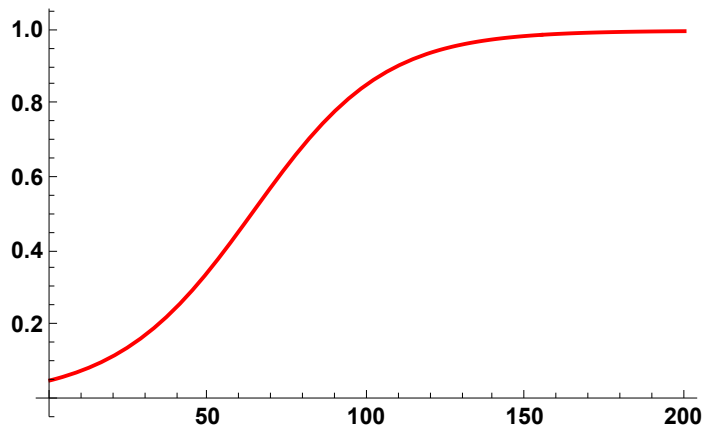

```
p3h05p05 = Plot[Evaluate[p[t] /. PSolve[5000, 0.95, 0.05, 0.5, 400, 0.05]],  
  {t, 0, 200}, PlotStyle → {Black, Thick}, AxesOrigin → {0, 0},  
  BaseStyle → {FontWeight → "Bold", FontColor → Black, FontSize → 12}]
```

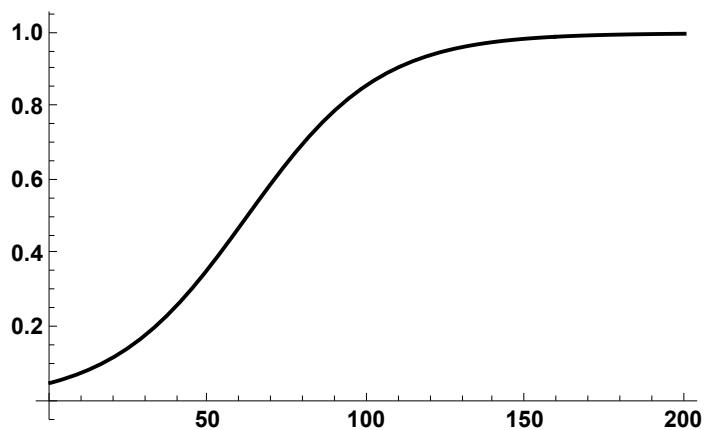

```
p3h09p05 = Plot[Evaluate[p[t] /. PSolve[5000, 0.95, 0.05, 0.9, 400, 0.05]],
  {t, 0, 200}, PlotStyle -> {Blue, Thick}, AxesOrigin -> {0, 0},
  BaseStyle -> {FontWeight -> "Bold", FontColor -> Black, FontSize -> 12}]
```

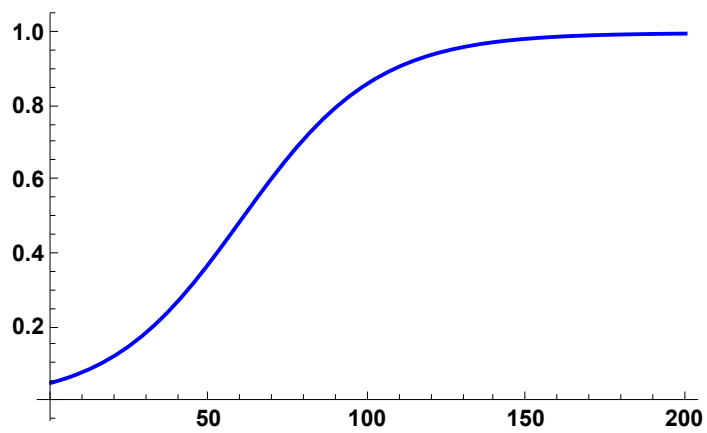

Composite plot

```
Trajs0955pc = Show[p3h01p05, p3h05p05, p3h09p05, ImageSize -> 250]
```

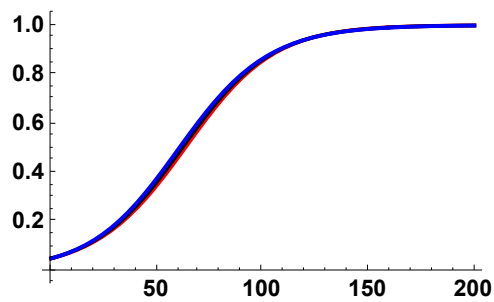

## Grid of key results

### Comparing coalescence-in-sweep-phase results and SLiM simulations

```
SimComp = Labeled[Grid[{{Text@TraditionalForm@Style[" $p_0 = 1/2N$ ", 24],
  Text@TraditionalForm@Style[" $p_0 = 0.02$ ", 24],
  Text@TraditionalForm@Style[" $p_0 = 0.05$ ", 24]}, {Sims0DN, Sims02pc,
  Sims05pc, Text@TraditionalForm@Style[" $\sigma = 0.00 \backslash n (F = 0.00)$ ", 24]},
  {Sims05DN, Sims052pc, Sims055pc,
  Text@TraditionalForm@Style[" $\sigma = 0.50 \backslash n (F \approx 0.33)$ ", 24]},
  {Sims095DN, Sims0952pc, Sims0955pc, Text@
  TraditionalForm@Style[" $\sigma = 0.95 \backslash n (F \approx 0.90)$ ", 24]}}, Spacings -> {2, 1}],
  {Text@TraditionalForm@Style["Expected \n Relative \n Diversity, \n  $\mathbb{E}[\pi_{SV}/\pi_0]$ ", 24],
  Text@TraditionalForm@Style["Scaled Recombination Rate,  $2Nr$ ", 24]}, {Left,
  Bottom}]
```

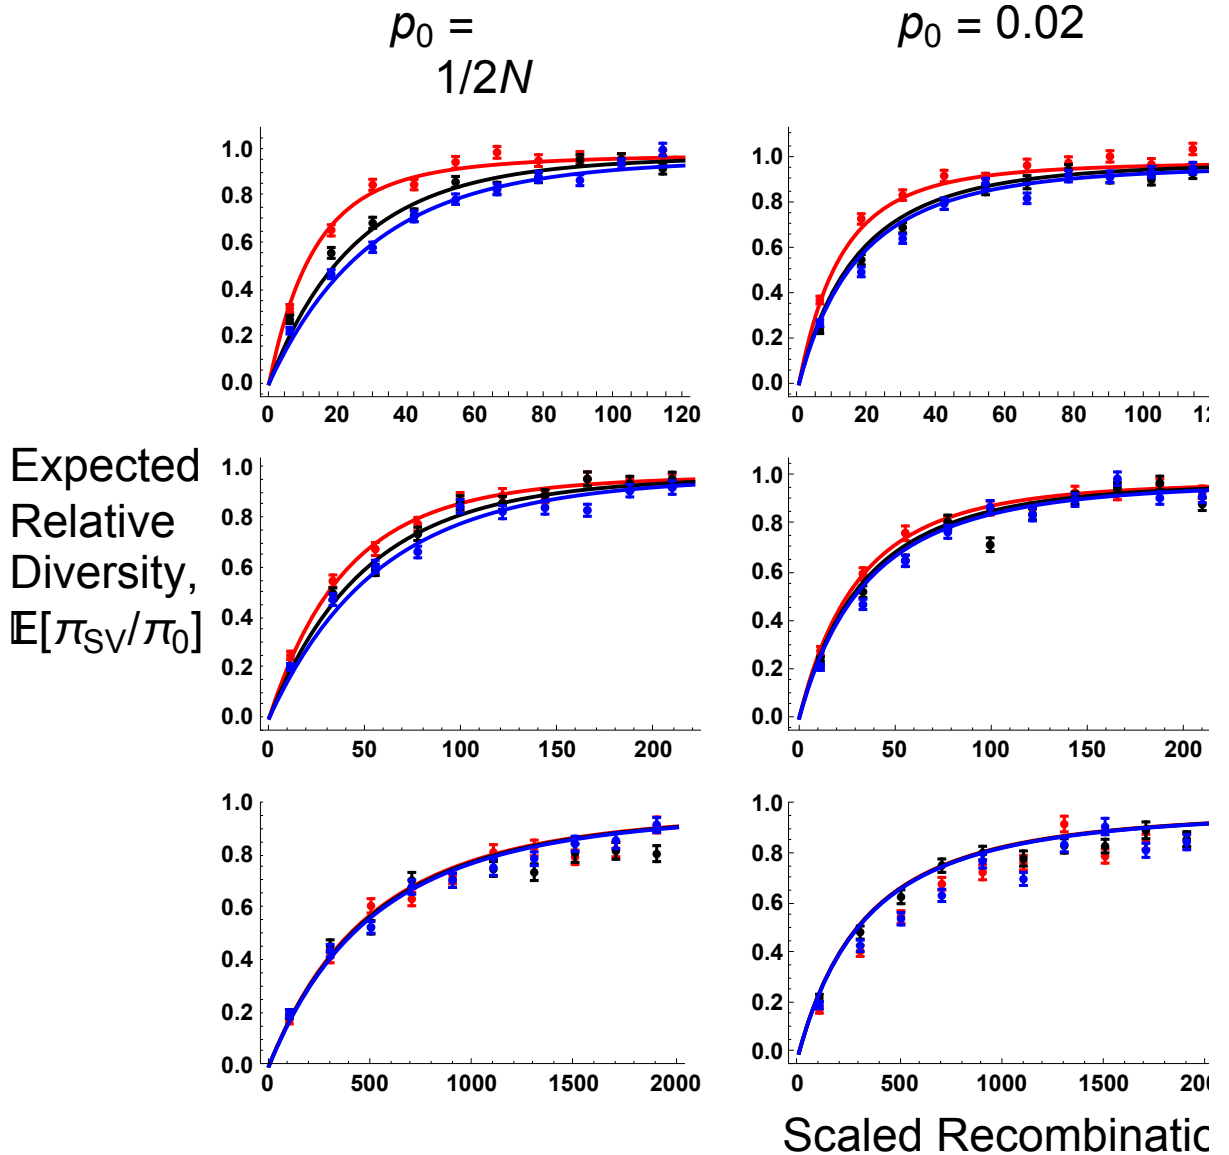

## Comparing coalescence-in-sweep-phase results and star-like approximation

```

AnalyticComp = Labeled[Grid[{{Text@TraditionalForm@Style[" $\rho_0 = 1/2N$ ", 24],
  Text@TraditionalForm@Style[" $\rho_0 = 0.02$ ", 24],
  Text@TraditionalForm@Style[" $\rho_0 = 0.05$ ", 24]}, {Sims0DN2, Sims02pc2,
  Sims05pc2, Text@TraditionalForm@Style[" $\sigma = 0.00 \backslash n (F = 0.00)$ ", 24]},
  {Sims05DN2, Sims052pc2, Sims055pc2,
  Text@TraditionalForm@Style[" $\sigma = 0.50 \backslash n (F \approx 0.33)$ ", 24]},
  {Sims095DN2, Sims0952pc2, Sims0955pc2, Text@
  TraditionalForm@Style[" $\sigma = 0.95 \backslash n (F \approx 0.90)$ ", 24]}}, Spacings -> {2, 1}],
  {Text@TraditionalForm@Style["Expected \n Relative \n Diversity, \n  $\mathbb{E}[\pi_{SV}/\pi_0]$ ", 24],
  Text@TraditionalForm@Style["Scaled Recombination Rate,  $2Nr$ ", 24]}, {Left,
  Bottom}]

```

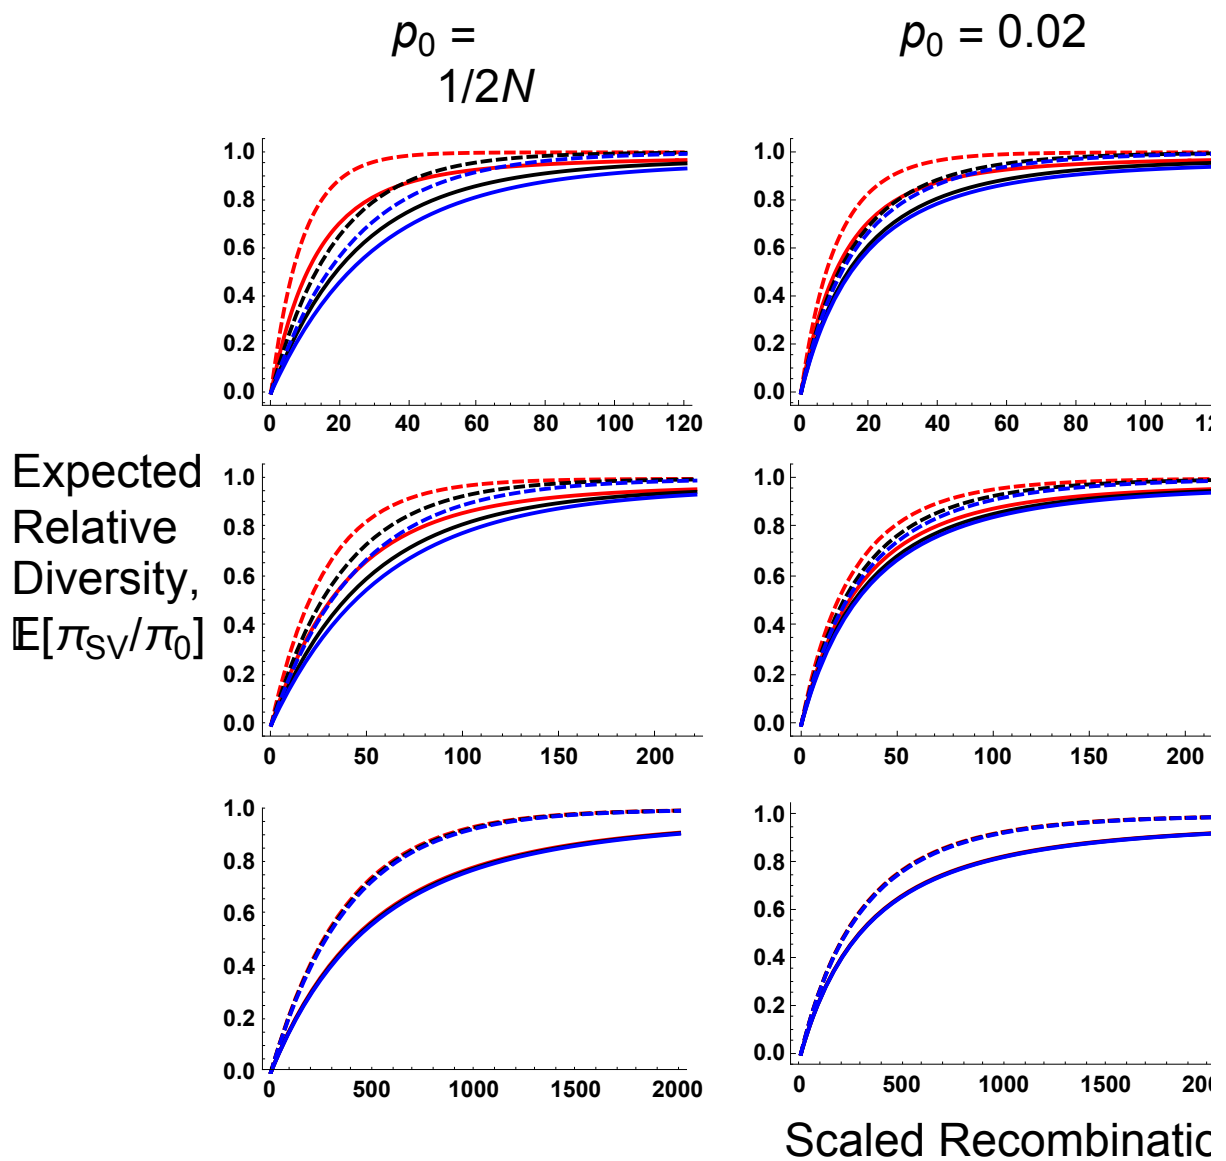

## Plot of sweep trajectories

SweepTrajs =

```
Labeled[Grid[{{Text@TraditionalForm@Style["σ = 0.00\n(F = 0.00)", 24],
  Text@TraditionalForm@Style["σ = 0.50\n(F ≈ 0.33)", 24],
  Text@TraditionalForm@Style["σ = 0.95\n(F ≈ 0.90)", 24]}, {Trajs0DN,
  Trajs05DN, Trajs095DN, Text@TraditionalForm@Style["p₀ = 1/2N", 24]},
{Trajs05pc, Trajs055pc, Trajs0955pc,
  Text@TraditionalForm@Style["p₀ = 0.05", 24]}}, Spacings → {2, 1}],
{Text@TraditionalForm@Style["Beneficial\nAllele\nFrequency", 24], Text@
  TraditionalForm@Style["Time (number of generations)", 24]}, {Left, Bottom}]
```

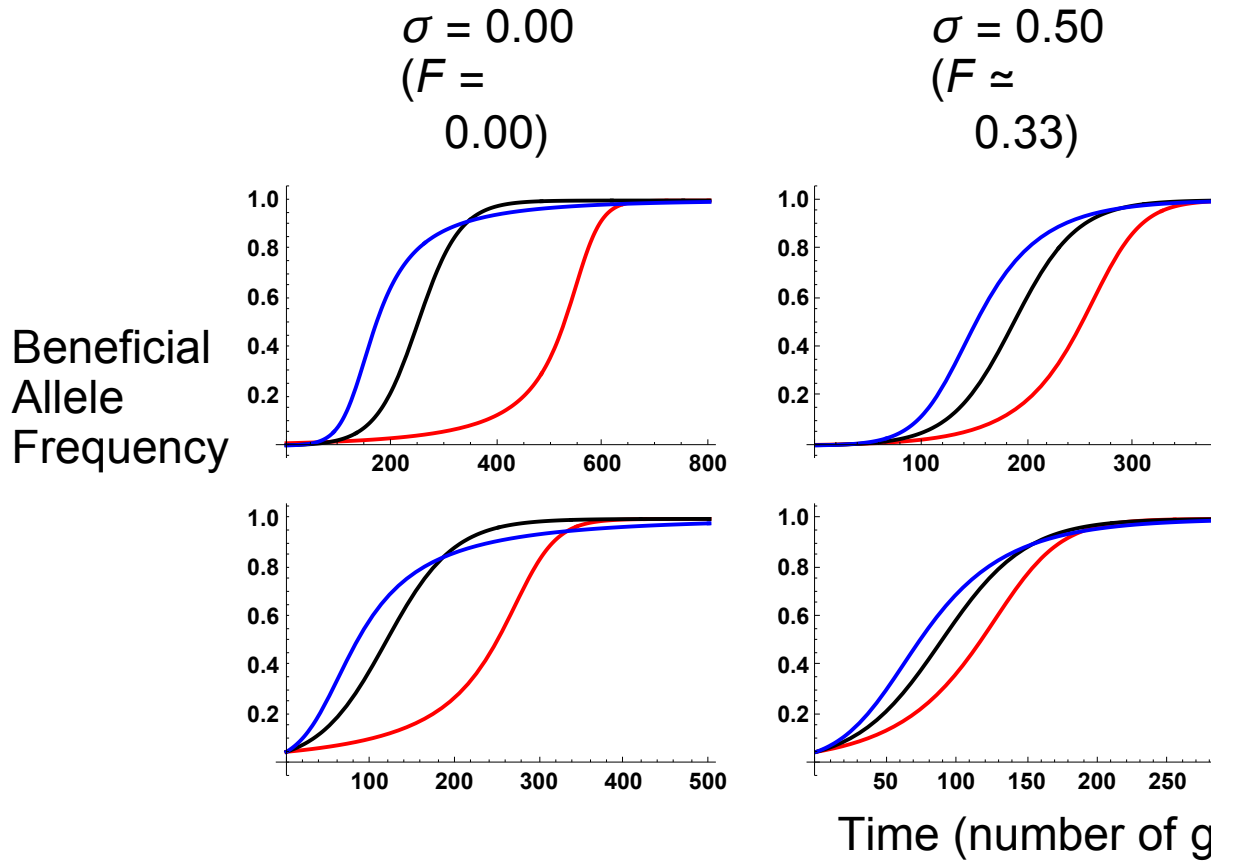

## Section D: Simulation comparisons, $\mathbb{E}[S]$ (Number of segregating sites)

### Equations

$$F[\sigma_-] := \frac{\sigma}{2 - \sigma}$$

$$\Phi[r_-, \sigma_-] := \frac{\sigma (2 - \sigma - 2 (1 - r) r (2 - 3 \sigma))}{(2 - \sigma) (2 - (1 - 2 (1 - r) r) \sigma)}$$

$$\text{PNR}[\text{Na}_-, F_-, \varpi_-, s_-, h_-, R_-, p0_-] := \left( \left( \frac{(F + h - F h)}{(1 - h + F h)} \left( \frac{1}{p0} + 1 \right) - 1 \right)^{-\frac{R(1-F)}{2 \text{Na} (F+h-F h) s}} \right)$$

$$\text{PNRI}[\text{Na}_-, F_-, \varpi_-, s_-, h_-, R_-, p0_-, i_-, n_-] := \text{PDF}[\text{BinomialDistribution}[n, \text{PNR}[\text{Na}, F, \varpi, s, h, R, p0]], i]$$

$$\begin{aligned} \text{PESF}[k_-, F_-, \varpi_-, R_-, i_-, p0_-] := & \left( \left( \frac{2R}{1+F} (1 - 2F + \varpi) p0 (1 - p0) \right)^k \text{Abs}[\text{StirlingS1}[i, k]] \right) / \\ & \text{Product} \left[ \left( \left( \frac{2R}{1+F} (1 - 2F + \varpi) p0 (1 - p0) \right) + l \right), \{l, 0, i - 1\} \right] \end{aligned}$$

$$\text{JS}[k_-] := \text{Sum} \left[ \frac{1}{j}, \{j, 1, k - 1\} \right]$$

$\mathbb{E}[s]$  is given as:

$$\begin{aligned} \text{ESS2}[\text{Na}_-, \sigma_-, s_-, h_-, R_-, \theta_-, p0_-, n_-] := & \left( \text{Sum} \left[ \left( \text{PNRI} \left[ \text{Na}, F[\sigma], \varpi \left[ \frac{R}{2 \text{Na}}, \sigma \right], s, h, R, p0, i, n \right] * \text{Sum} \left[ \right. \right. \right. \right. \\ & \left. \left. \left. \text{PESF} \left[ k, F[\sigma], \varpi \left[ \frac{R}{2 \text{Na}}, \sigma \right], R, i, p0 \right] * \text{JS}[k + n - i], \{k, \theta, i\} \right] \right), \{i, \theta, n\} \right] \right) \theta \end{aligned}$$

The following is the ‘effective’ starting frequency of a beneficial allele at initial frequency  $\frac{1}{2\text{Na}}$ , given that it goes to fixation:

$$\text{Boostp0}[\text{Na}_-, s_-, h_-, \sigma_-] := \frac{1 + F[\sigma]}{4 \text{Na} s (F[\sigma] + h - F[\sigma] h)}$$

## Outcrossing case ( $\sigma = F = 0$ )

Preliminaries

```
SetDirectory[NotebookDirectory[]];
Rin = Table[6 + 12 * i, {i, 0, 9}];
```

## Simulation comparisons, from initial frequency $p_0 = 1/2N$

$h = 0.5$

SLiM simulation data

```
Ssh05 = Import["SLiM_F0/StatsProc_R_120_h_0.5_self_0_f_1e-04_10b_SLiM.dat",
  "Table"][[1]];
Ssh05CIB = Import["SLiM_F0/StatsProc_R_120_h_0.5_self_0_f_1e-04_10b_SLiM.dat",
  "Table"][[2]];
Ssh05CIT = Import["SLiM_F0/StatsProc_R_120_h_0.5_self_0_f_1e-04_10b_SLiM.dat",
  "Table"][[3]];
Ssh05S = Partition[Riffle[Partition[Riffle[Rin, Ssh05], 2],
  Map[ErrorBar, Partition[Riffle[-Ssh05CIB, Ssh05CIT], 2]]], 2];
```

MSMS simulation data

```

Ssh05MSMS =
  Import["MSMS_SV_5K/StatsProc_R_240_h_0.5_self_0_f_1e-04_10b_MSMS.dat",
    "Table"][[1]];
Ssh05MSMSCIB = Import[
  "MSMS_SV_5K/StatsProc_R_240_h_0.5_self_0_f_1e-04_10b_MSMS.dat",
  "Table"][[2]];
Ssh05MSMSCIT = Import[
  "MSMS_SV_5K/StatsProc_R_240_h_0.5_self_0_f_1e-04_10b_MSMS.dat",
  "Table"][[3]];
Ssh05MSMSS = Partition[Riffle[Partition[Riffle[Rin, Ssh05MSMS], 2],
  Map[ErrorBar, Partition[Riffle[-Ssh05MSMSCIB, Ssh05MSMSCIT], 2]], 2];

```

Analytical result

```

Sh05 = Plot[ESS2[5000, 0, 0.05, 0.5, R, 4, Boostp0[5000, 0.05, 0.5, 0], 10],
  {R, 0, 120}, PlotStyle → {{Black, Thick}},
  PlotRange → {All, {-0.5, 12.5}}, Frame → {{True, False}, {True, False}},
  BaseStyle → {FontWeight → "Bold", FontColor → Black, FontSize → 12}]

```

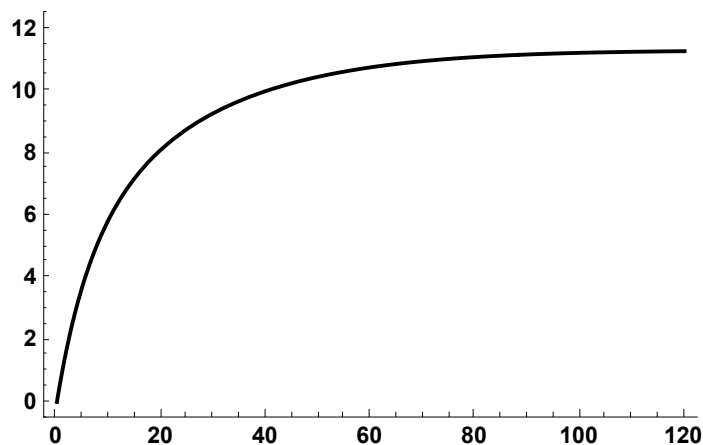

SLiM simulation plot

```

Sh05S = ErrorListPlot[Ssh05S,
  PlotStyle → {Black, PointSize[0.02]}, PlotRange → {{0, 120}, {0, 12}}]

```

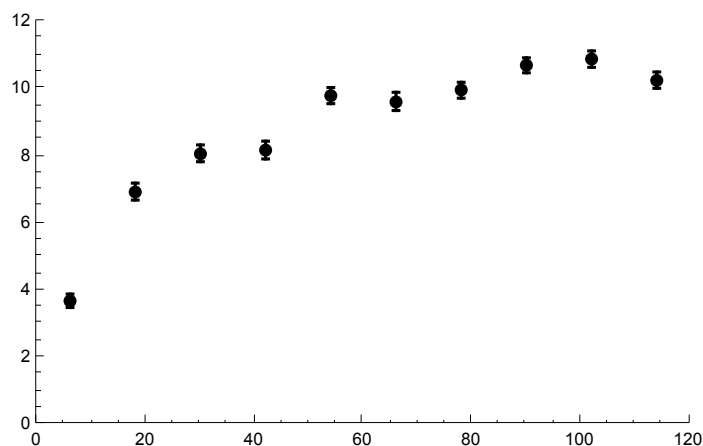

MSMS simulation plot



```
Sh05MSMSS = ErrorListPlot[SSh05MSMSS,
  PlotStyle -> {Gray, PointSize[0.02]}, PlotRange -> {{0, 120}, {0, 12}}]
```

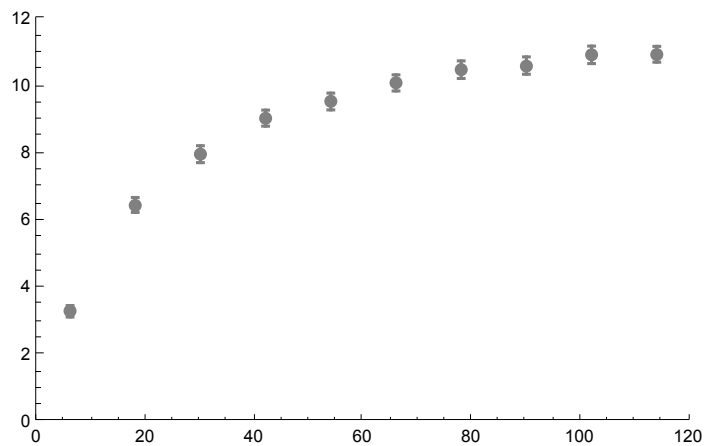

All together

```
h05MSMSSegsites = Show[Sh05, Sh05S, Sh05MSMSS, ImageSize -> 200]
```

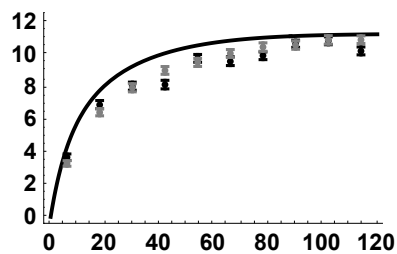

$h = 0.1$

SLiM simulation data

```
SSh01 = Import["SLiM_F0/StatsProc_R_120_h_0.1_self_0_f_1e-04_10b_SLiM.dat",
  "Table"][[1]];
SSh01CIB = Import["SLiM_F0/StatsProc_R_120_h_0.5_self_0_f_1e-04_10b_SLiM.dat",
  "Table"][[2]];
SSh01CIT = Import["SLiM_F0/StatsProc_R_120_h_0.5_self_0_f_1e-04_10b_SLiM.dat",
  "Table"][[3]];
SSh01S = Partition[Riffle[Partition[Riffle[Rin, SSh01], 2],
  Map[ErrorBar, Partition[Riffle[-SSh01CIB, SSh01CIT], 2]]], 2];
```

MSMS simulation data

```

Ssh01MSMS =
  Import["MSMS_SV_5K/StatsProc_R_240_h_0.1_self_0_f_1e-04_10b_MSMS.dat",
    "Table"][[1]];
Ssh01MSMSCIB = Import[
  "MSMS_SV_5K/StatsProc_R_240_h_0.1_self_0_f_1e-04_10b_MSMS.dat",
  "Table"][[2]];
Ssh01MSMSCIT = Import[
  "MSMS_SV_5K/StatsProc_R_240_h_0.1_self_0_f_1e-04_10b_MSMS.dat",
  "Table"][[3]];
Ssh01MSMSS = Partition[Riffle[Partition[Riffle[Rin, Ssh01MSMS], 2],
  Map[ErrorBar, Partition[Riffle[-Ssh01MSMSCIB, Ssh01MSMSCIT], 2]], 2];

```

Analytical result

```

Sh01 = Plot[ESS2[5000, 0, 0.05, 0.1, R, 4, Boostp0[5000, 0.05, 0.1, 0], 10],
  {R, 0, 120}, PlotStyle → {{Red, Thick}},
  PlotRange → {All, {-0.5, 12.5}}, Frame → {{True, False}, {True, False}},
  BaseStyle → {FontWeight → "Bold", FontColor → Black, FontSize → 12}]

```

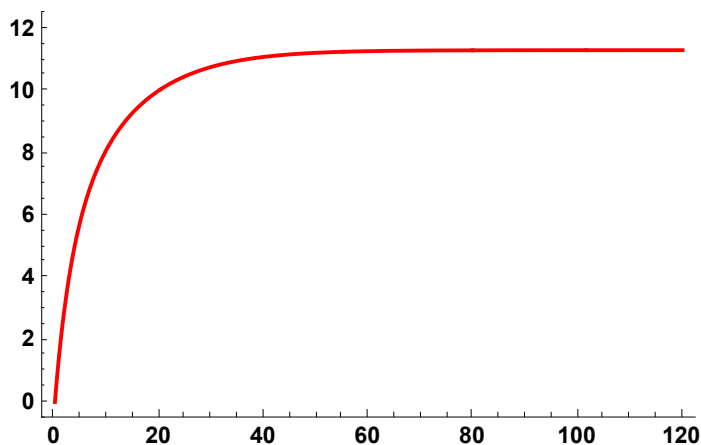

SLiM simulation plot

```

Sh01S = ErrorListPlot[Ssh01S,
  PlotStyle → {Red, PointSize[0.02]}, PlotRange → {{0, 120}, {0, 12}}]

```

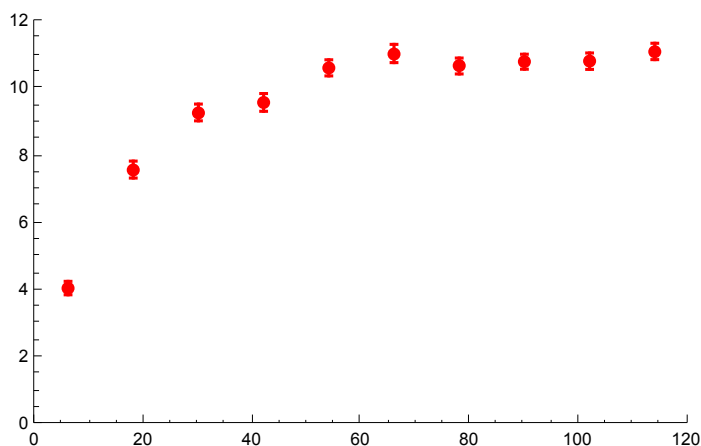

MSMS simulation plot

```
Sh01MSMSS = ErrorListPlot[SSh01MSMSS,
  PlotStyle → {Pink, PointSize[0.02]}, PlotRange → {{0, 120}, {0, 12}}]
```

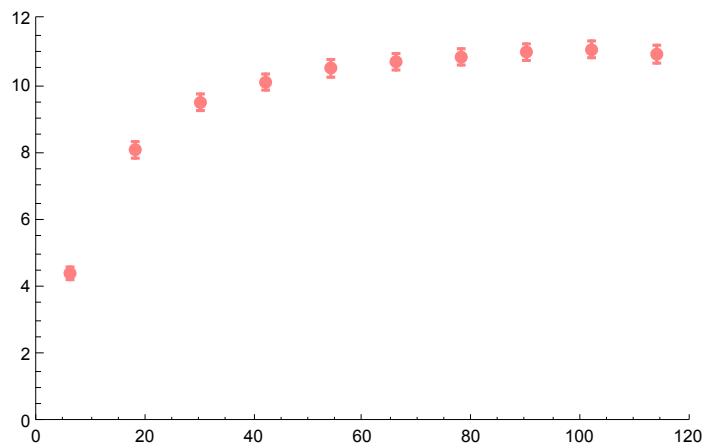

All together

```
h01MSMSSegsites = Show[Sh01, Sh01S, Sh01MSMSS, ImageSize → 200]
```

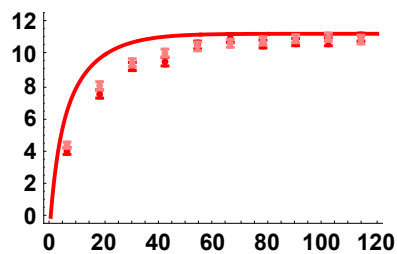

$h = 0.9$

SLiM simulation data

```
SSh09 = Import["SLiM_F0/StatsProc_R_120_h_0.9_self_0_f_1e-04_10b_SLiM.dat",
  "Table"][[1]];
SSh09CIB = Import["SLiM_F0/StatsProc_R_120_h_0.9_self_0_f_1e-04_10b_SLiM.dat",
  "Table"][[2]];
SSh09CIT = Import["SLiM_F0/StatsProc_R_120_h_0.9_self_0_f_1e-04_10b_SLiM.dat",
  "Table"][[3]];
SSh09S = Partition[Riffle[Partition[Riffle[Rin, SSh09], 2],
  Map[ErrorBar, Partition[Riffle[-SSh09CIB, SSh09CIT], 2]]], 2];
```

MSMS simulation data

```

Ssh09MSMS =
  Import["MSMS_SV_5K/StatsProc_R_240_h_0.9_self_0_f_1e-04_10b_MSMS.dat",
    "Table"][[1]];
Ssh09MSMSCIB = Import[
  "MSMS_SV_5K/StatsProc_R_240_h_0.9_self_0_f_1e-04_10b_MSMS.dat",
  "Table"][[2]];
Ssh09MSMSCIT = Import[
  "MSMS_SV_5K/StatsProc_R_240_h_0.9_self_0_f_1e-04_10b_MSMS.dat",
  "Table"][[3]];
Ssh09MSMSS = Partition[Riffle[Partition[Riffle[Rin, Ssh09MSMS], 2],
  Map[ErrorBar, Partition[Riffle[-Ssh09MSMSCIB, Ssh09MSMSCIT], 2]], 2];

```

Analytical result

```

Sh09 = Plot[ESS2[5000, 0, 0.05, 0.9, R, 4, Boostp0[5000, 0.05, 0.9, 0], 10],
  {R, 0, 120}, PlotStyle → {{Blue, Thick}},
  PlotRange → {All, {-0.5, 12.5}}, Frame → {{True, False}, {True, False}},
  BaseStyle → {FontWeight → "Bold", FontColor → Black, FontSize → 12}]

```

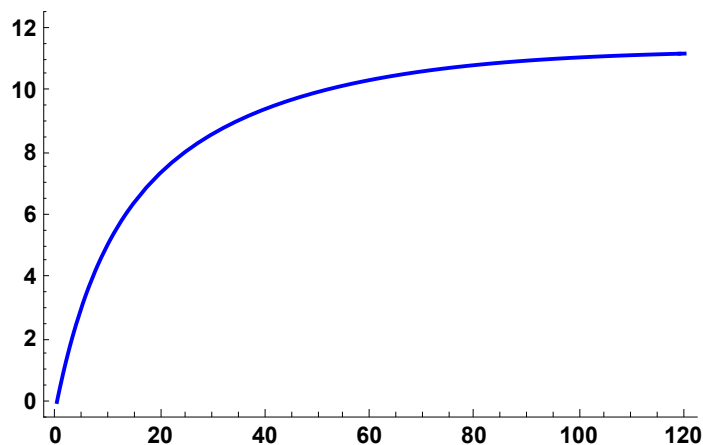

SLiM simulation plot

```

Sh09S = ErrorListPlot[Ssh09S,
  PlotStyle → {Blue, PointSize[0.02]}, PlotRange → {{0, 120}, {0, 12}}]

```

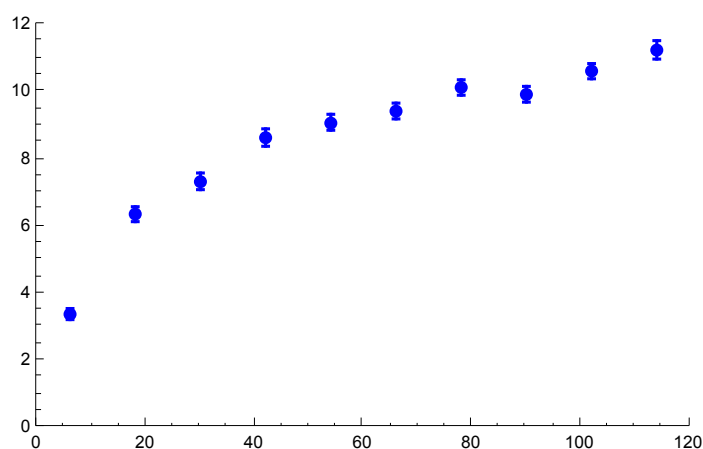

MSMS simulation plot

```
Sh09MSMSS = ErrorListPlot[SSh09MSMSS,
  PlotStyle -> {Cyan, PointSize[0.02]}, PlotRange -> {{0, 120}, {0, 12}}]
```

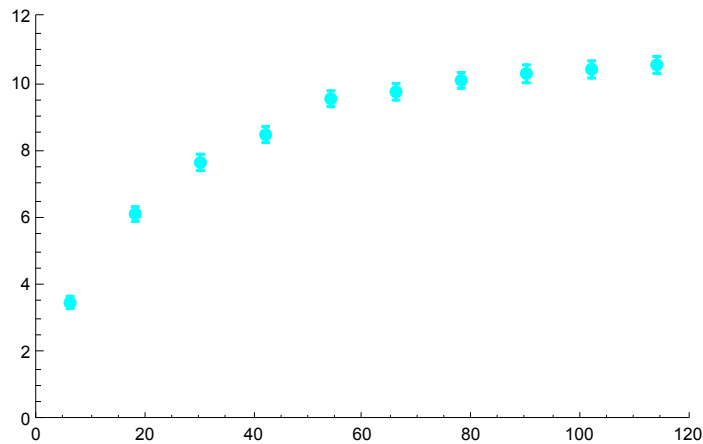

All together

```
h09MSMSSegsites = Show[Sh09, Sh09S, Sh09MSMSS, ImageSize -> 200]
```

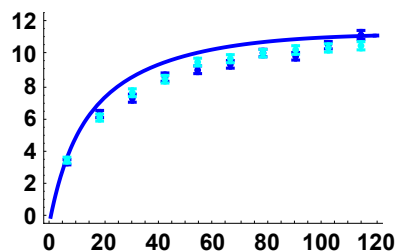

All  $h$  results, analytical solution and SLiM results

```
SimSegSitess0DN = Show[Sh01, Sh01S, Sh05, Sh05S, Sh09, Sh09S, ImageSize -> 200]
```

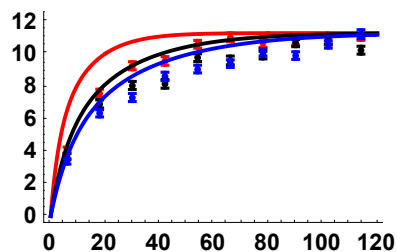

## Simulation comparisons, $p_0 = 0.02$

$h = 0.5$

SLiM simulation data

```
SSh05p002 = Import[
  "SLiM_F0/StatsProc_R_120_h_0.5_self_0_f_0.02_10b_SLiM.dat", "Table"][[1]];
SSh05p002CIB = Import[
  "SLiM_F0/StatsProc_R_120_h_0.5_self_0_f_0.02_10b_SLiM.dat", "Table"][[2]];
SSh05p002CIT = Import[
  "SLiM_F0/StatsProc_R_120_h_0.5_self_0_f_0.02_10b_SLiM.dat", "Table"][[3]];
SSh05p002S = Partition[Riffle[Partition[Riffle[Rin, SSh05p002], 2],
  Map[ErrorBar, Partition[Riffle[-SSh05p002CIB, SSh05p002CIT], 2]]], 2];
```

MSMS simulation data

```
SSH05p002MSMS =
  Import["MSMS_SV_5K/StatsProc_R_240_h_0.5_self_0_f_0.02_10b_MSMS.dat",
    "Table"][[1]];
SSH05p002MSMSCIB = Import[
  "MSMS_SV_5K/StatsProc_R_240_h_0.5_self_0_f_0.02_10b_MSMS.dat",
  "Table"][[2]];
SSH05p002MSMSCIT = Import[
  "MSMS_SV_5K/StatsProc_R_240_h_0.5_self_0_f_0.02_10b_MSMS.dat",
  "Table"][[3]];
SSH05p002MSMSS = Partition[Riffle[Partition[Riffle[Rin, SSH05p002MSMS], 2], Map[
  ErrorBar, Partition[Riffle[-SSH05p002MSMSCIB, SSH05p002MSMSCIT], 2]]], 2];
```

Analytical result

```
SSPh05p002 = Plot[ESS2[5000, 0, 0.05, 0.5, R, 4, 0.02, 10],
  {R, 0, 120}, PlotStyle → {{Black, Thick}},
  PlotRange → {All, {-0.5, 12.5}}, Frame → {{True, False}, {True, False}},
  BaseStyle → {FontWeight → "Bold", FontColor → Black, FontSize → 12}]
```

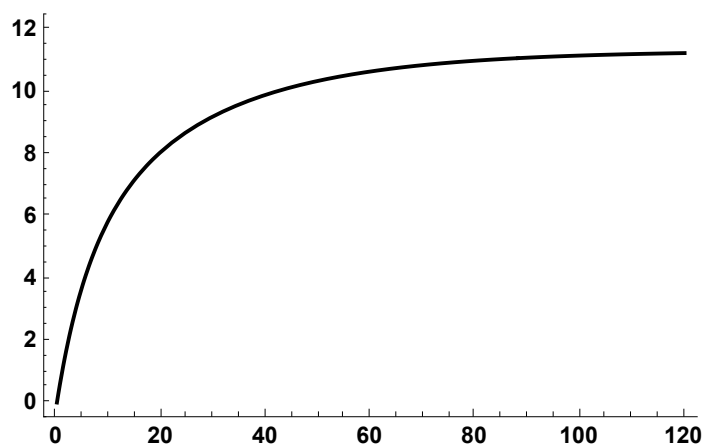

SLiM simulation plot

```
SPh05p002S = ErrorListPlot[SSH05p002S,
  PlotStyle → {Black, PointSize[0.02]}, PlotRange → {{0, 120}, {0, 12}}]
```

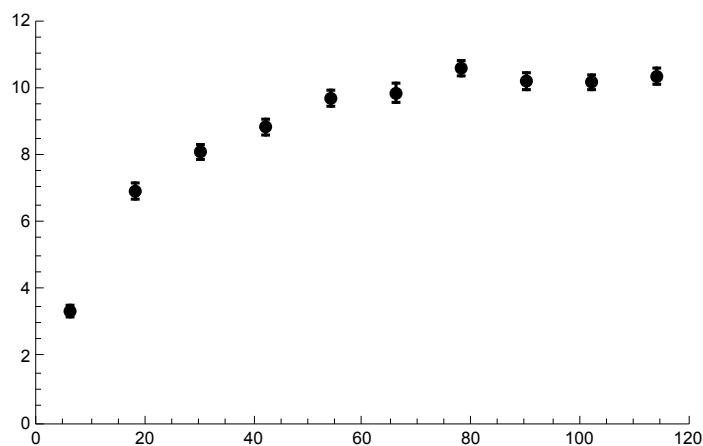

MSMS simulation plot

```
SPh05p002MSMSS = ErrorListPlot[SSh05p002MSMSS,
  PlotStyle → {Gray, PointSize[0.02]}, PlotRange → {{0, 120}, {0, 12}}]
```

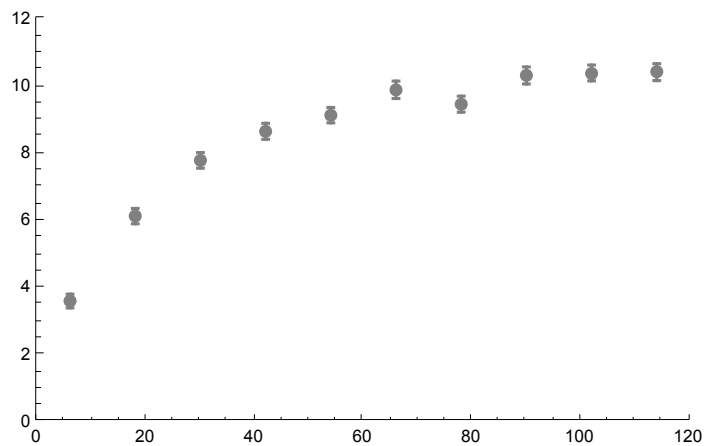

All together

```
h05MSMS2pcSegsites = Show[SSPh05p002, SPh05p002S, SPh05p002MSMSS, ImageSize → 200]
```

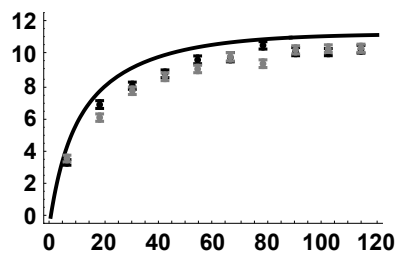

$h = 0.1$

SLiM simulation data

```
SSh01p002 = Import[
  "SLiM_F0/StatsProc_R_120_h_0.1_self_0_f_0.02_10b_SLiM.dat", "Table"][[1]];
SSh01p002CIB = Import[
  "SLiM_F0/StatsProc_R_120_h_0.1_self_0_f_0.02_10b_SLiM.dat", "Table"][[2]];
SSh01p002CIT = Import[
  "SLiM_F0/StatsProc_R_120_h_0.1_self_0_f_0.02_10b_SLiM.dat", "Table"][[3]];
SSh01p002S = Partition[Riffle[Partition[Riffle[Rin, SSh01p002], 2],
  Map[ErrorBar, Partition[Riffle[-SSh01p002CIB, SSh01p002CIT], 2]]], 2];
```

MSMS simulation data

```

SSh01p002MSMS =
  Import["MSMS_SV_5K/StatsProc_R_240_h_0.1_self_0_f_0.02_10b_MSMS.dat",
    "Table"][[1]];
SSh01p002MSMSCIB = Import[
  "MSMS_SV_5K/StatsProc_R_240_h_0.1_self_0_f_0.02_10b_MSMS.dat",
  "Table"][[2]];
SSh01p002MSMSCIT = Import[
  "MSMS_SV_5K/StatsProc_R_240_h_0.1_self_0_f_0.02_10b_MSMS.dat",
  "Table"][[3]];
SSh01p002MSMSS = Partition[Riffle[Partition[Riffle[Rin, SSh01p002MSMS], 2], Map[
  ErrorBar, Partition[Riffle[-SSh01p002MSMSCIB, SSh01p002MSMSCIT], 2]]], 2];

```

Analytical result

```

SSPh01p002 = Plot[ESS2[5000, 0, 0.05, 0.1, R, 4, 0.02, 10],
  {R, 0, 120}, PlotStyle → {{Red, Thick}},
  PlotRange → {All, {-0.5, 12.5}}, Frame → {{True, False}, {True, False}},
  BaseStyle → {FontWeight → "Bold", FontColor → Black, FontSize → 12}]

```

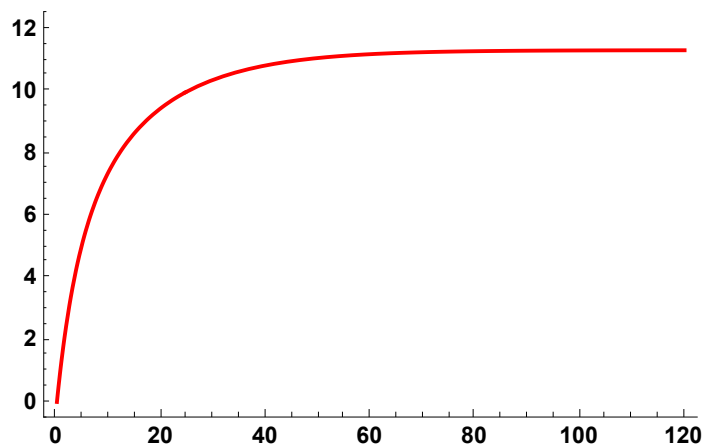

SLiM simulation plot

```

SPh01p002S = ErrorListPlot[SSh01p002S,
  PlotStyle → {Red, PointSize[0.02]}, PlotRange → {{0, 120}, {0, 12}}]

```

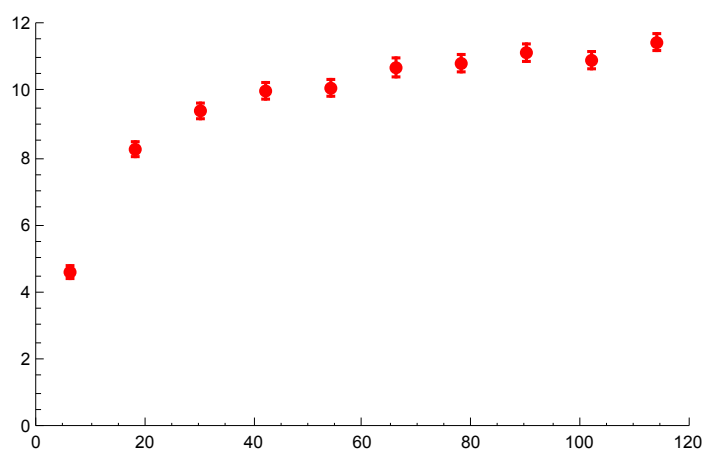

MSMS simulation plot



```
SPh01p002MSMSS = ErrorListPlot[SSh01p002MSMSS,
  PlotStyle → {Pink, PointSize[0.02]}, PlotRange → {{0, 120}, {0, 12}}]
```

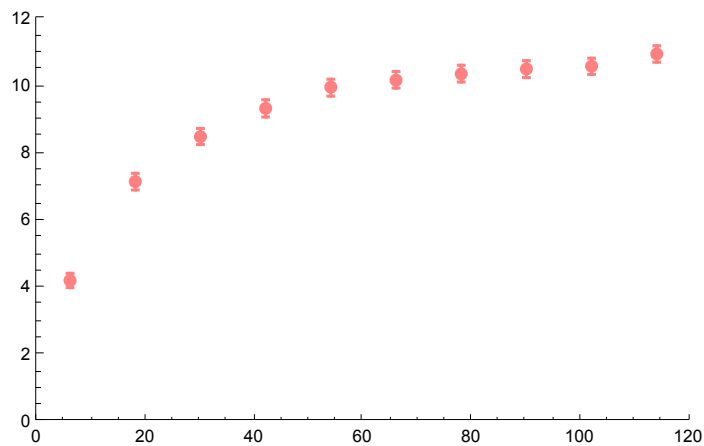

All together

```
h01MSMS2pcSegsites = Show[SSPh01p002, SPh01p002S, SPh01p002MSMSS, ImageSize → 200]
```

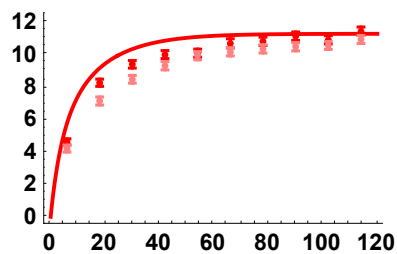

$h = 0.9$

SLIM simulation data

```
SSh09p002 = Import[
  "SLIM_F0/StatsProc_R_120_h_0.9_self_0_f_0.02_10b_SLIM.dat", "Table"][[1]];
SSh09p002CIB = Import[
  "SLIM_F0/StatsProc_R_120_h_0.9_self_0_f_0.02_10b_SLIM.dat", "Table"][[2]];
SSh09p002CIT = Import[
  "SLIM_F0/StatsProc_R_120_h_0.9_self_0_f_0.02_10b_SLIM.dat", "Table"][[3]];
SSh09p002S = Partition[Riffle[Partition[Riffle[Rin, SSh09p002], 2],
  Map[ErrorBar, Partition[Riffle[-SSh09p002CIB, SSh09p002CIT], 2]]], 2];
```

MSMS simulation data

```

SSH09p002MSMS =
  Import["MSMS_SV_5K/StatsProc_R_240_h_0.9_self_0_f_0.02_10b_MSMS.dat",
    "Table"][[1]];
SSH09p002MSMSCIB = Import[
  "MSMS_SV_5K/StatsProc_R_240_h_0.9_self_0_f_0.02_10b_MSMS.dat",
  "Table"][[2]];
SSH09p002MSMSCIT = Import[
  "MSMS_SV_5K/StatsProc_R_240_h_0.9_self_0_f_0.02_10b_MSMS.dat",
  "Table"][[3]];
SSH09p002MSMSS = Partition[Riffle[Partition[Riffle[Rin, SSH09p002MSMS], 2], Map[
  ErrorBar, Partition[Riffle[-SSH09p002MSMSCIB, SSH09p002MSMSCIT], 2]]], 2];

```

Analytical result

```

SSPh09p002 = Plot[ESS2[5000, 0, 0.05, 0.9, R, 4, 0.02, 10],
  {R, 0, 120}, PlotStyle → {{Blue, Thick}},
  PlotRange → {All, {-0.5, 12.5}}, Frame → {{True, False}, {True, False}},
  BaseStyle → {FontWeight → "Bold", FontColor → Black, FontSize → 12}]

```

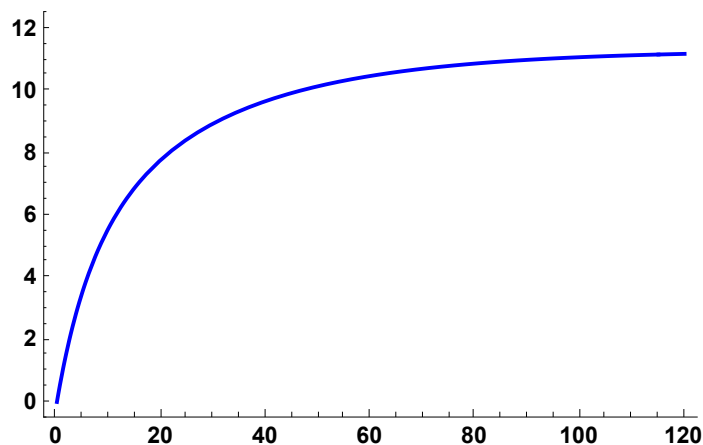

SLiM simulation plot

```

SPh09p002S = ErrorListPlot[SSH09p002S,
  PlotStyle → {Blue, PointSize[0.02]}, PlotRange → {{0, 120}, {0, 12}}]

```

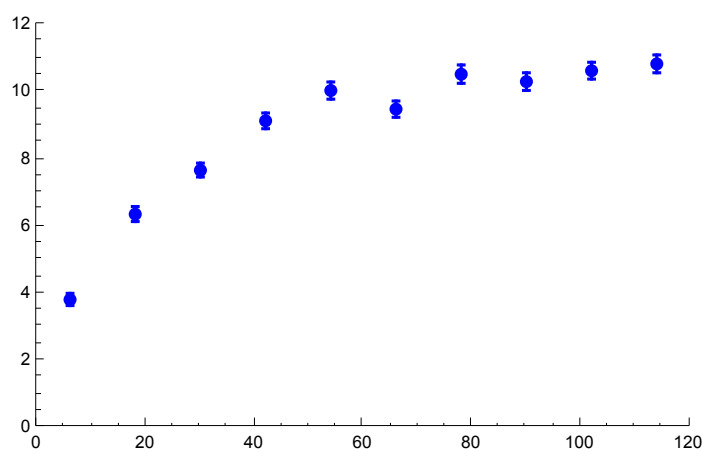

MSMS simulation plot

```
SPh09p002MSMSS = ErrorListPlot[SSh09p002MSMSS,
  PlotStyle -> {Cyan, PointSize[0.02]}, PlotRange -> {{0, 120}, {0, 12}}]
```

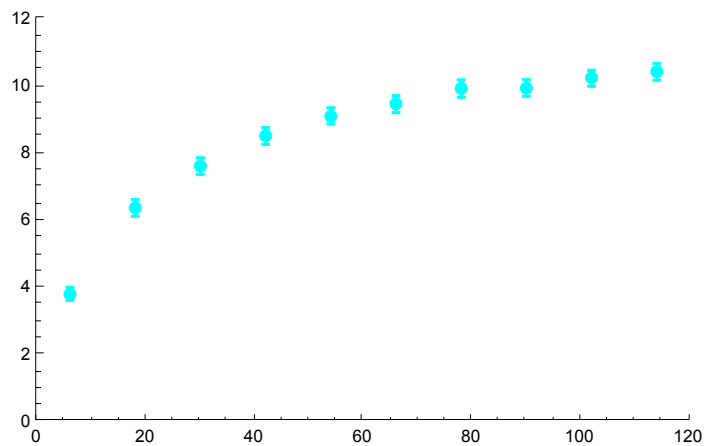

All together

```
h09MSMS2pcSegsites = Show[SPh09p002, SPh09p002S, SPh09p002MSMSS, ImageSize -> 200]
```

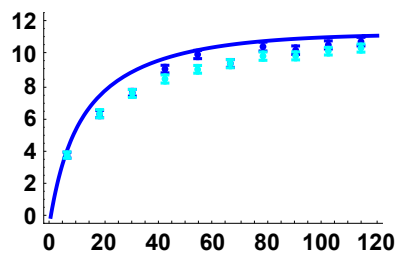

All  $h$  results, analytical solution and SLiM results

```
SimSegSittess02pc = Show[SPh01p002, SPh01p002S,
  SSPh05p002, SPh05p002S, SSPh09p002, SPh09p002S, ImageSize -> 200]
```

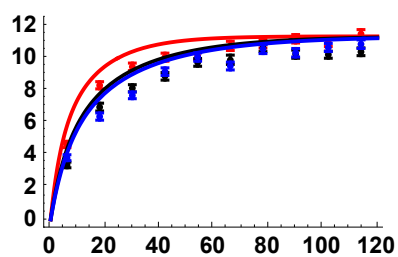

Simulation comparisons,  $p_0 = 0.05$

$h = 0.5$

SLiM simulation data

```

SSh05p005 = Import[
  "SLIM_F0/StatsProc_R_120_h_0.5_self_0_f_0.05_10b_SLIM.dat", "Table"][[1]];
SSh05p005CIB = Import[
  "SLIM_F0/StatsProc_R_120_h_0.5_self_0_f_0.05_10b_SLIM.dat", "Table"][[2]];
SSh05p005CIT = Import[
  "SLIM_F0/StatsProc_R_120_h_0.5_self_0_f_0.05_10b_SLIM.dat", "Table"][[3]];
SSh05p005S = Partition[Riffle[Partition[Riffle[Rin, SSh05p005], 2],
  Map[ErrorBar, Partition[Riffle[-SSh05p005CIB, SSh05p005CIT], 2]]], 2];

```

MSMS simulation data

```

SSh05p005MSMS =
  Import["MSMS_SV_5K/StatsProc_R_240_h_0.5_self_0_f_0.05_10b_MSMS.dat",
    "Table"][[1]];
SSh05p005MSMSCIB = Import[
  "MSMS_SV_5K/StatsProc_R_240_h_0.5_self_0_f_0.05_10b_MSMS.dat",
  "Table"][[2]];
SSh05p005MSMSCIT = Import[
  "MSMS_SV_5K/StatsProc_R_240_h_0.5_self_0_f_0.05_10b_MSMS.dat",
  "Table"][[3]];
SSh05p005MSMSS = Partition[Riffle[Partition[Riffle[Rin, SSh05p005MSMS], 2], Map[
  ErrorBar, Partition[Riffle[-SSh05p005MSMSCIB, SSh05p005MSMSCIT], 2]]], 2];

```

Analytical result

```

SSPh05p005 = Plot[ESS2[5000, 0, 0.05, 0.5, R, 4, 0.05, 10],
  {R, 0, 120}, PlotStyle -> {{Black, Thick}},
  PlotRange -> {All, {-0.5, 12.5}}, Frame -> {{True, False}, {True, False}},
  BaseStyle -> {FontWeight -> "Bold", FontColor -> Black, FontSize -> 12}]

```

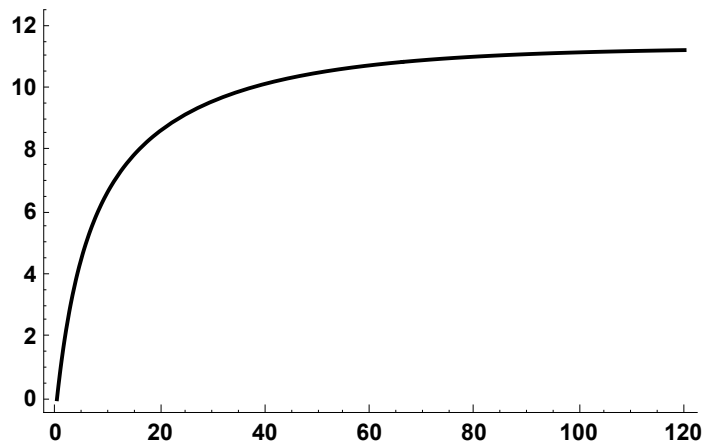

SLiM simulation plot

```
SPh05p005S = ErrorListPlot[SSh05p005S,
  PlotStyle → {Black, PointSize[0.02]}, PlotRange → {{0, 120}, {0, 12.5}}]
```

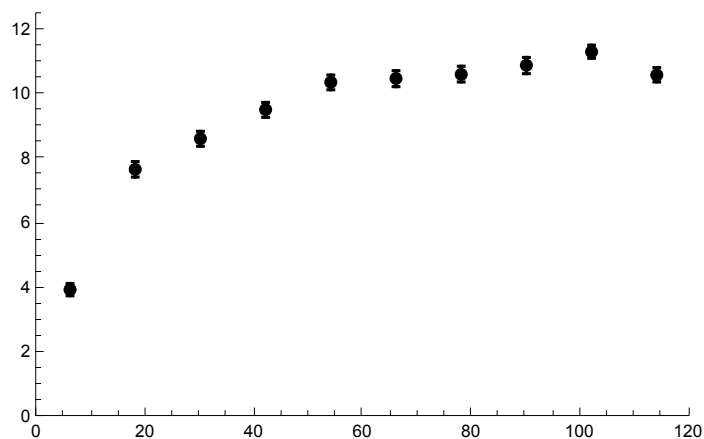

MSMS simulation plot

```
SPh05p005MSMSS = ErrorListPlot[SSh05p005MSMSS,
  PlotStyle → {Gray, PointSize[0.02]}, PlotRange → {{0, 120}, {0, 12}}]
```

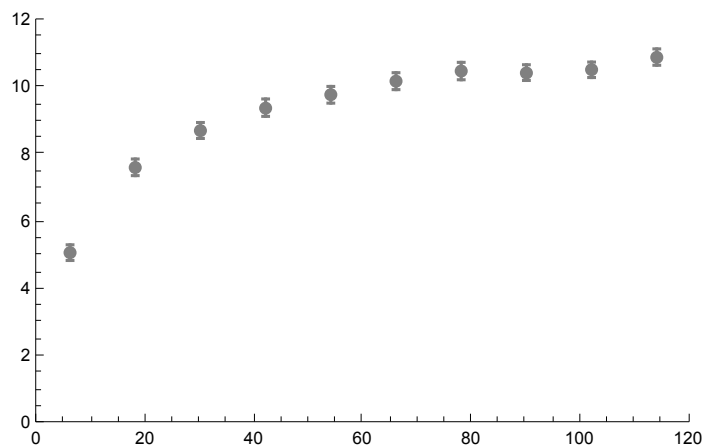

All together

```
h05MSMS5pcSegSites = Show[SSPh05p005, SPh05p005S, SPh05p005MSMSS, ImageSize → 200]
```

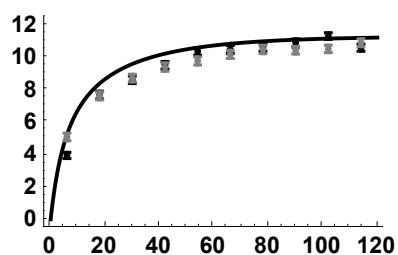

$h = 0.1$

SLiM simulation data

```

SSh01p005 = Import[
  "SLIM_F0/StatsProc_R_120_h_0.1_self_0_f_0.05_10b_SLIM.dat", "Table"][[1]];
SSh01p005CIB = Import[
  "SLIM_F0/StatsProc_R_120_h_0.1_self_0_f_0.05_10b_SLIM.dat", "Table"][[2]];
SSh01p005CIT = Import[
  "SLIM_F0/StatsProc_R_120_h_0.1_self_0_f_0.05_10b_SLIM.dat", "Table"][[3]];
SSh01p005S = Partition[Riffle[Partition[Riffle[Rin, SSh01p005], 2],
  Map[ErrorBar, Partition[Riffle[-SSh01p005CIB, SSh01p005CIT], 2]]], 2];

```

MSMS simulation data

```

SSh01p005MSMS =
  Import["MSMS_SV_5K/StatsProc_R_240_h_0.1_self_0_f_0.05_10b_MSMS.dat",
    "Table"][[1]];
SSh01p005MSMSCIB = Import[
  "MSMS_SV_5K/StatsProc_R_240_h_0.1_self_0_f_0.05_10b_MSMS.dat",
  "Table"][[2]];
SSh01p005MSMSCIT = Import[
  "MSMS_SV_5K/StatsProc_R_240_h_0.1_self_0_f_0.05_10b_MSMS.dat",
  "Table"][[3]];
SSh01p005MSMSS = Partition[Riffle[Partition[Riffle[Rin, SSh01p005MSMS], 2], Map[
  ErrorBar, Partition[Riffle[-SSh01p005MSMSCIB, SSh01p005MSMSCIT], 2]]], 2];

```

Analytical result

```

SSPh01p005 = Plot[ESS2[5000, 0, 0.05, 0.1, R, 4, 0.05, 10],
  {R, 0, 120}, PlotStyle -> {{Red, Thick}},
  PlotRange -> {All, {-0.5, 12.5}}, Frame -> {{True, False}, {True, False}},
  BaseStyle -> {FontWeight -> "Bold", FontColor -> Black, FontSize -> 12}]

```

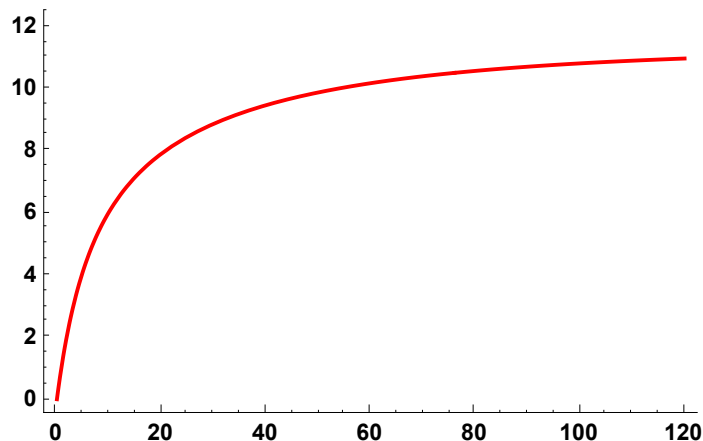

SLiM simulation plot

```
SPh01p005S = ErrorListPlot[SSh01p005S,
  PlotStyle → {Red, PointSize[0.02]}, PlotRange → {{0, 120}, {0, 12}}]
```

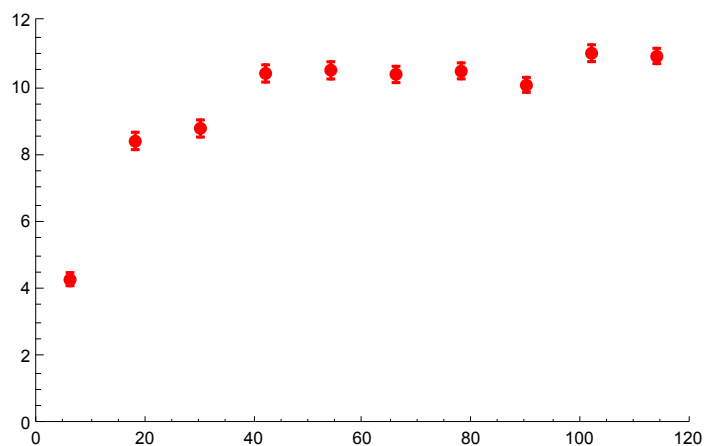

MSMS simulation plot

```
SPh01p005MSMSS = ErrorListPlot[SSh01p005MSMSS,
  PlotStyle → {Pink, PointSize[0.02]}, PlotRange → {{0, 120}, {0, 12}}]
```

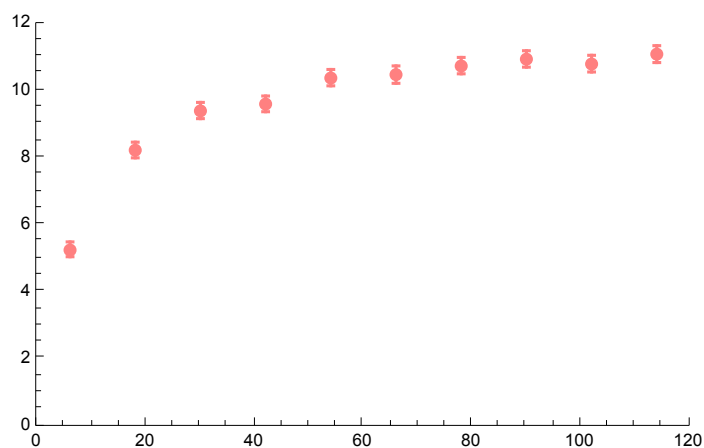

All together

```
h01MSMS5pcSegSites = Show[SSPh01p005, SPh01p005S, SPh01p005MSMSS, ImageSize → 200]
```

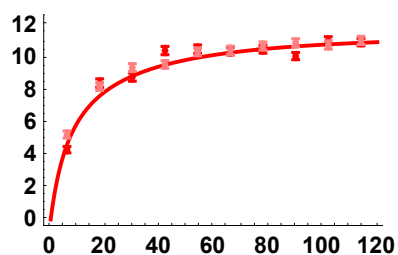

h = 0.9

SLiM simulation data

```

SSh09p005 = Import[
  "SLIM_F0/StatsProc_R_120_h_0.9_self_0_f_0.05_10b_SLIM.dat", "Table"][[1]];
SSh09p005CIB = Import[
  "SLIM_F0/StatsProc_R_120_h_0.9_self_0_f_0.05_10b_SLIM.dat", "Table"][[2]];
SSh09p005CIT = Import[
  "SLIM_F0/StatsProc_R_120_h_0.9_self_0_f_0.05_10b_SLIM.dat", "Table"][[3]];
SSh09p005S = Partition[Riffle[Partition[Riffle[Rin, SSh09p005], 2],
  Map[ErrorBar, Partition[Riffle[-SSh09p005CIB, SSh09p005CIT], 2]]], 2];

```

MSMS simulation data

```

SSh09p005MSMS =
  Import["MSMS_SV_5K/StatsProc_R_240_h_0.9_self_0_f_0.05_10b_MSMS.dat",
    "Table"][[1]];
SSh09p005MSMSCIB = Import[
  "MSMS_SV_5K/StatsProc_R_240_h_0.9_self_0_f_0.05_10b_MSMS.dat",
  "Table"][[2]];
SSh09p005MSMSCIT = Import[
  "MSMS_SV_5K/StatsProc_R_240_h_0.9_self_0_f_0.05_10b_MSMS.dat",
  "Table"][[3]];
SSh09p005MSMSS = Partition[Riffle[Partition[Riffle[Rin, SSh09p005MSMS], 2], Map[
  ErrorBar, Partition[Riffle[-SSh09p005MSMSCIB, SSh09p005MSMSCIT], 2]]], 2];

```

Analytical result

```

SSPh09p005 = Plot[ESS2[5000, 0, 0.05, 0.9, R, 4, 0.05, 10],
  {R, 0, 120}, PlotStyle -> {{Blue, Thick}},
  PlotRange -> {All, {-0.5, 12}}, Frame -> {{True, False}, {True, False}},
  BaseStyle -> {FontWeight -> "Bold", FontColor -> Black, FontSize -> 12}]

```

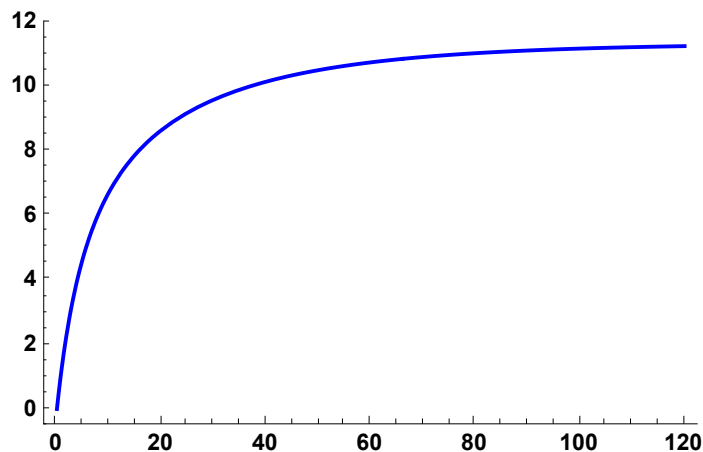

SLiM simulation plot



```
SPh09p005S = ErrorListPlot[SSh09p005S,
  PlotStyle -> {Blue, PointSize[0.02]}, PlotRange -> {{0, 120}, {0, 12}}]
```

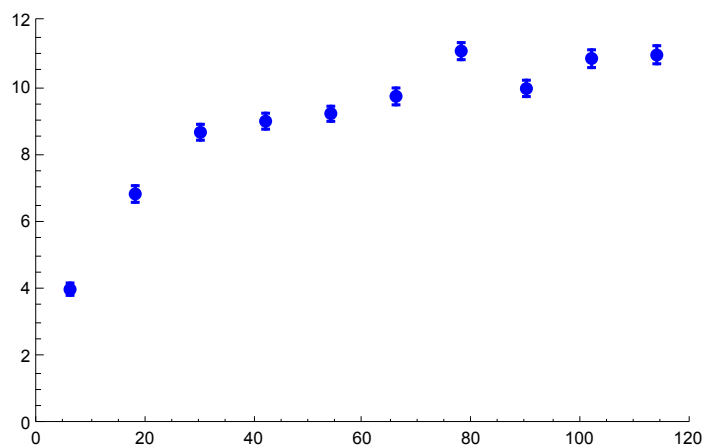

MSMS simulation plot

```
SPh09p005MSMSS = ErrorListPlot[SSh09p005MSMSS,
  PlotStyle -> {Cyan, PointSize[0.02]}, PlotRange -> {{0, 120}, {0, 12}}]
```

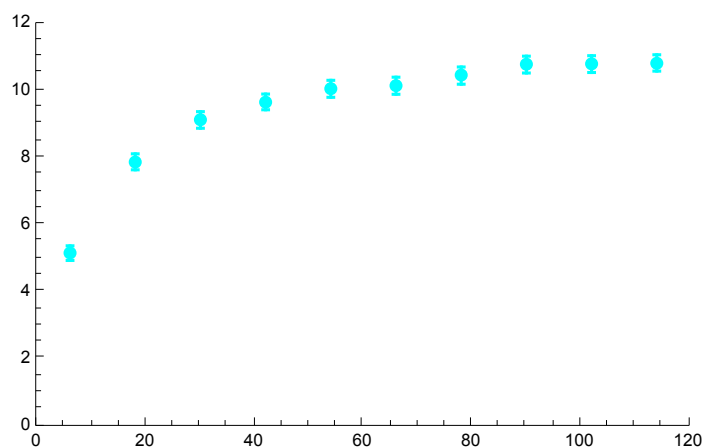

```
h09MSMS5pcSegSites = Show[SSPh09p005, SPh09p005S, SPh09p005MSMSS, ImageSize -> 200]
```

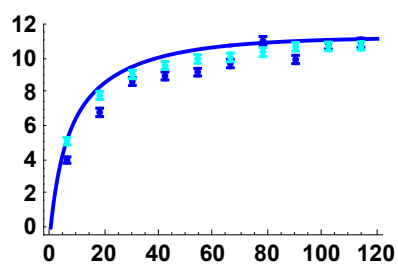

All  $h$  results, analytical solution and SLiM results

```
SimSegSittess05pc = Show[SSPh01p005, SPh01p005S,
  SSPh05p005, SPh05p005S, SSPh09p005, SPh09p005S, ImageSize -> 200]
```

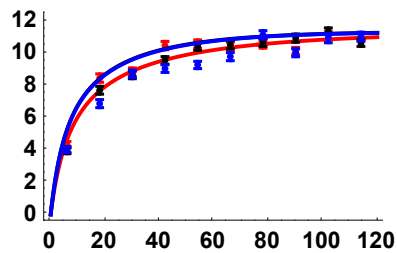

$$\sigma = 1/2 \ (F = 1/3)$$

All simulation data from here on is from SLiM.

Preliminaries

```
SetDirectory[NotebookDirectory[]];
Rin = Table[11 + 22 * i, {i, 0, 9}];
```

Simulation comparisons, from initial frequency  $p_0 = 1/2 N$

$h = 0.5$

```
SSh05s05 =
  Import["SLiM_F033/StatsProc_R_220_h_0.5_self_0.5_f_1e-04_10b_SLiM.dat",
    "Table"][[1]];
SSh05s05CIB = Import[
  "SLiM_F033/StatsProc_R_220_h_0.5_self_0.5_f_1e-04_10b_SLiM.dat",
  "Table"][[2]];
SSh05s05CIT = Import[
  "SLiM_F033/StatsProc_R_220_h_0.5_self_0.5_f_1e-04_10b_SLiM.dat",
  "Table"][[3]];
SSh05s05S = Partition[Riffle[Partition[Riffle[Rin, SSh05s05], 2],
  Map[ErrorBar, Partition[Riffle[-SSh05s05CIB, SSh05s05CIT], 2]]], 2];
```

Sh05s05 =

```
Plot[{ESS2[5000, 0.5, 0.05, 0.5, R,  $\frac{4}{1 + \frac{1}{3}}$ , Boostp0[5000, 0.05, 0.5, 0.5], 10]},
  {R, 0, 220}, PlotStyle -> {{Black, Thick}},
  PlotRange -> {All, {-0.5, 12}}, Frame -> {{True, False}, {True, False}},
  BaseStyle -> {FontWeight -> "Bold", FontColor -> Black, FontSize -> 12}]
```

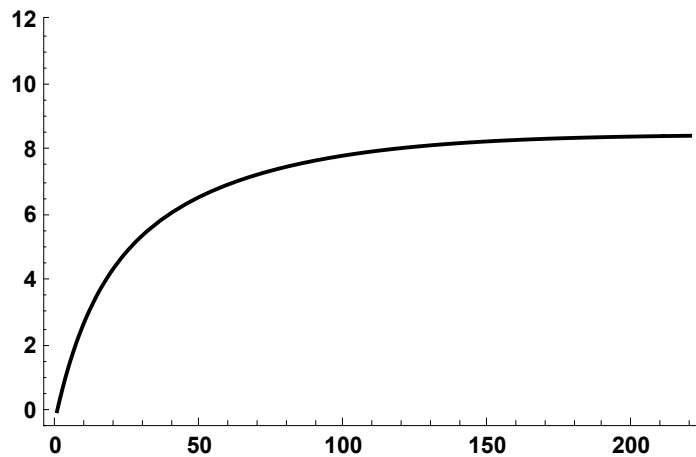

```
Sh05s05S = ErrorListPlot[SSh05s05S,
  PlotStyle -> {Black, PointSize[0.02]}, PlotRange -> {{0, 220}, {0, 12}}]
```

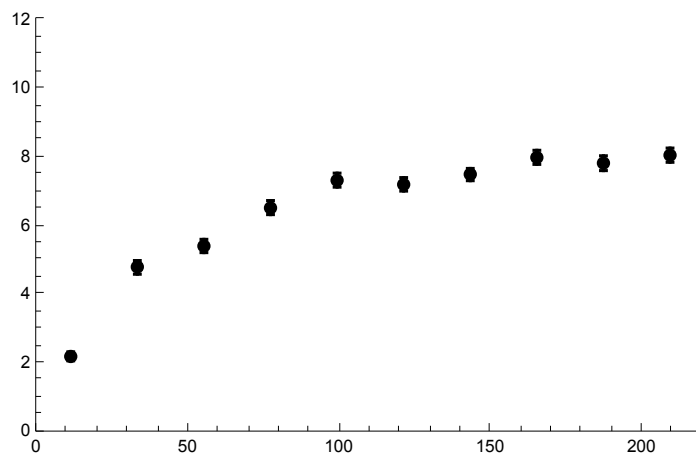

Show[Sh05s05, Sh05s05S]

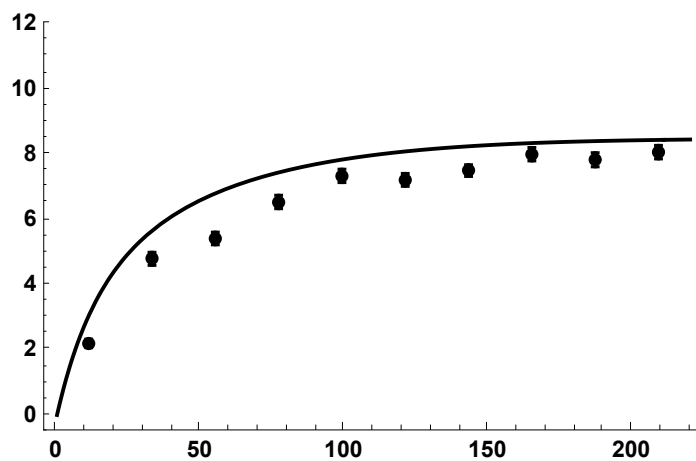

h = 0.1

SSh01s05 =

```
Import["SLIM_F033/StatsProc_R_220_h_0.1_self_0.5_f_1e-04_10b_SLIM.dat",
  "Table"][[1]];
```

SSh01s05CIB = Import[

```
"SLIM_F033/StatsProc_R_220_h_0.1_self_0.5_f_1e-04_10b_SLIM.dat",
  "Table"][[2]];
```

SSh01s05CIT = Import[

```
"SLIM_F033/StatsProc_R_220_h_0.1_self_0.5_f_1e-04_10b_SLIM.dat",
  "Table"][[3]];
```

SSh01s05S = Partition[Riffle[Partition[Riffle[Rin, SSh01s05], 2],

```
Map[ErrorBar, Partition[Riffle[-SSh01s05CIB, SSh01s05CIT], 2]]], 2];
```

Sh01s05 =

```
Plot[{ESS2[5000, 0.5, 0.05, 0.1, R,  $\frac{4}{1 + \frac{1}{3}}$ , Boostp0[5000, 0.05, 0.1, 0.5], 10]},
```

```
{R, 0, 220}, PlotStyle → {{Red, Thick}},
```

```
PlotRange → {All, {-0.5, 12}}, Frame → {{True, False}, {True, False}},
```

```
BaseStyle → {FontWeight → "Bold", FontColor → Black, FontSize → 12}]
```

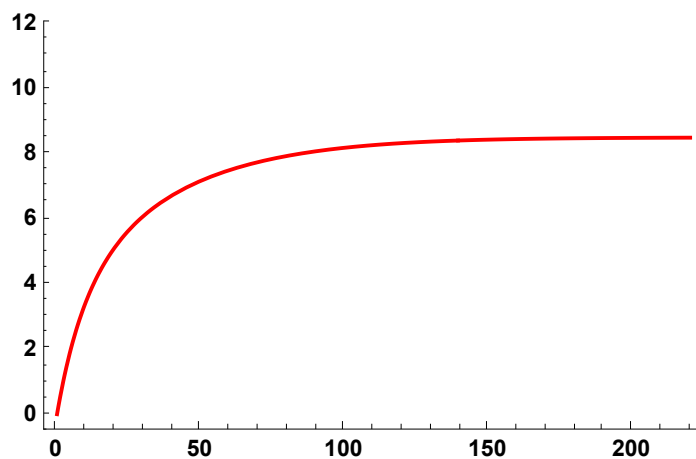

Sh01s05S = ErrorListPlot[SSh01s05S,

```
PlotStyle → {Red, PointSize[0.02]}, PlotRange → {{0, 220}, {0, 12}}]
```

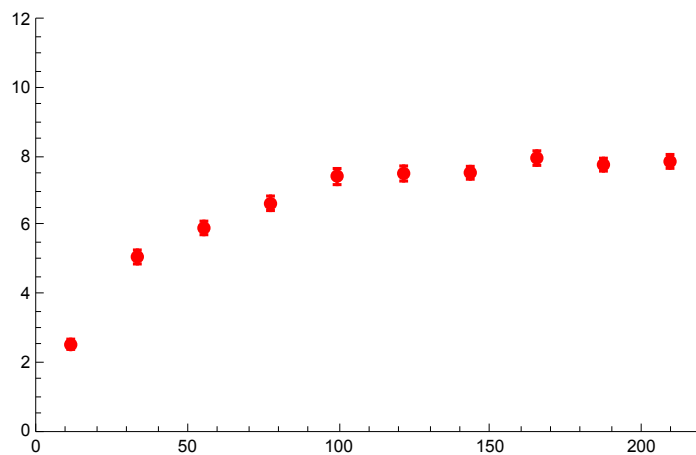

```
Show[Sh01s05, Sh01s05S]
```

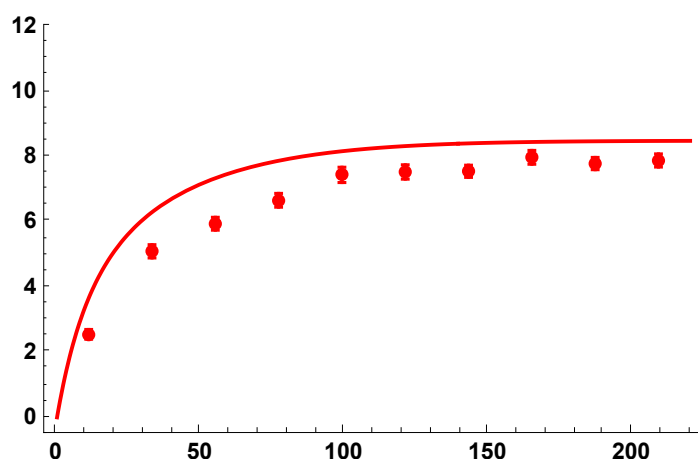

```
h = 0.9
```

```
SSh09s05 =
```

```
  Import["SLIM_F033/StatsProc_R_220_h_0.9_self_0.5_f_1e-04_10b_SLIM.dat",
    "Table"][[1]];

```

```
SSh09s05CIB = Import[
```

```
  "SLIM_F033/StatsProc_R_220_h_0.9_self_0.5_f_1e-04_10b_SLIM.dat",
  "Table"][[2]];

```

```
SSh09s05CIT = Import[
```

```
  "SLIM_F033/StatsProc_R_220_h_0.9_self_0.5_f_1e-04_10b_SLIM.dat",
  "Table"][[3]];

```

```
SSh09s05S = Partition[Riffle[Partition[Riffle[Rin, SSh09s05], 2],
```

```
  Map[ErrorBar, Partition[Riffle[-SSh09s05CIB, SSh09s05CIT], 2]]], 2];

```

```
Sh09s05 =
```

```
Plot[{ESS2[5000, 0.5, 0.05, 0.9, R,  $\frac{4}{1 + \frac{1}{3}}$ , Boostp0[5000, 0.05, 0.9, 0.5], 10]},
  {R, 0, 220}, PlotStyle -> {{Blue, Thick}},
  PlotRange -> {All, {-0.5, 12}}, Frame -> {{True, False}, {True, False}},
  BaseStyle -> {FontWeight -> "Bold", FontColor -> Black, FontSize -> 12}]

```

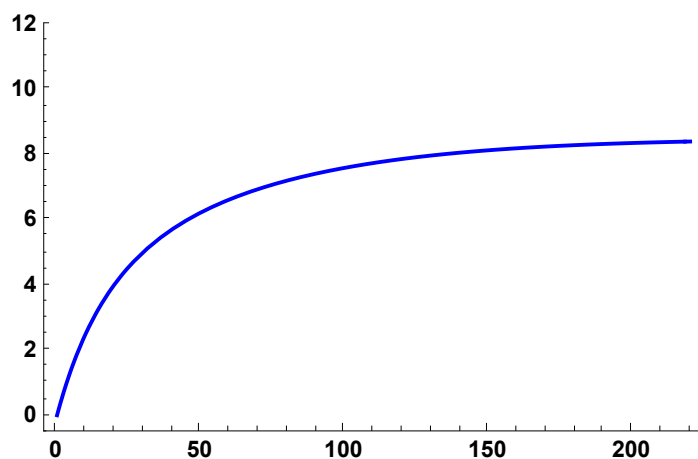

```
Sh09s05S = ErrorListPlot[SSh09s05S,
  PlotStyle -> {Blue, PointSize[0.02]}, PlotRange -> {{0, 220}, {0, 12}}]
```

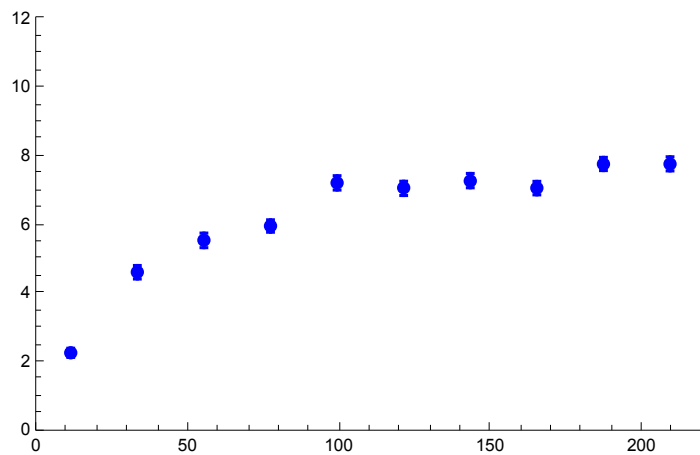

```
Show[Sh09s05, Sh09s05S]
```

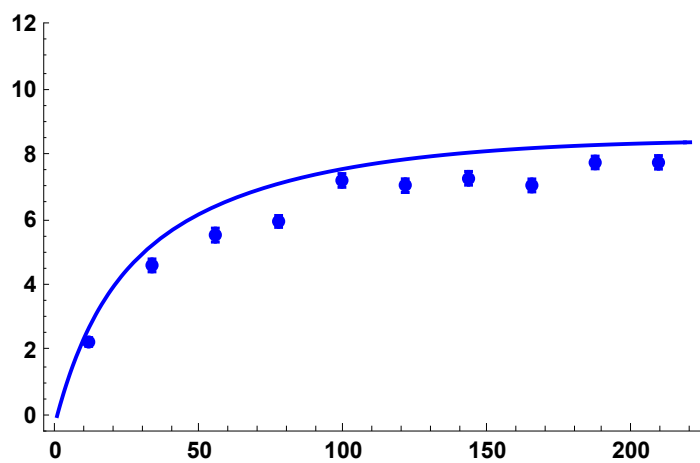

All results together

```
SimSegSitess05DN =
  Show[Sh01s05, Sh01s05S, Sh05s05, Sh05s05S, Sh09s05, Sh09s05S, ImageSize -> 200]
```

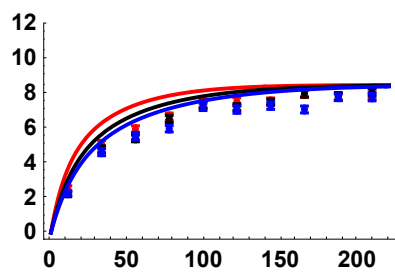

Simulation comparisons,  $p_0 = 0.02$

$h = 0.5$

```

SSh05p002s05 =
  Import["SLIM_F033/StatsProc_R_220_h_0.9_self_0.5_f_0.02_10b_SLIM.dat",
    "Table"][[1]];
SSh05p002s05CIB = Import[
  "SLIM_F033/StatsProc_R_220_h_0.9_self_0.5_f_0.02_10b_SLIM.dat",
  "Table"][[2]];
SSh05p002s05CIT = Import[
  "SLIM_F033/StatsProc_R_220_h_0.9_self_0.5_f_0.02_10b_SLIM.dat",
  "Table"][[3]];
SSh05p002s05S = Partition[Riffle[Partition[Riffle[Rin, SSh05p002s05], 2],
  Map[ErrorBar, Partition[Riffle[-SSh05p002s05CIB, SSh05p002s05CIT], 2]], 2];

SSPh05p002s05 = Plot[ $\left\{ \text{ESS2}\left[5000, 0.5, 0.05, 0.5, R, \frac{4}{1 + \frac{1}{3}}, 0.02, 10\right] \right\}$ ,
  {R, 0, 220}, PlotStyle → {{Black, Thick}},
  PlotRange → {All, {-0.5, 12}}, Frame → {{True, False}, {True, False}},
  BaseStyle → {FontWeight → "Bold", FontColor → Black, FontSize → 12}]

```

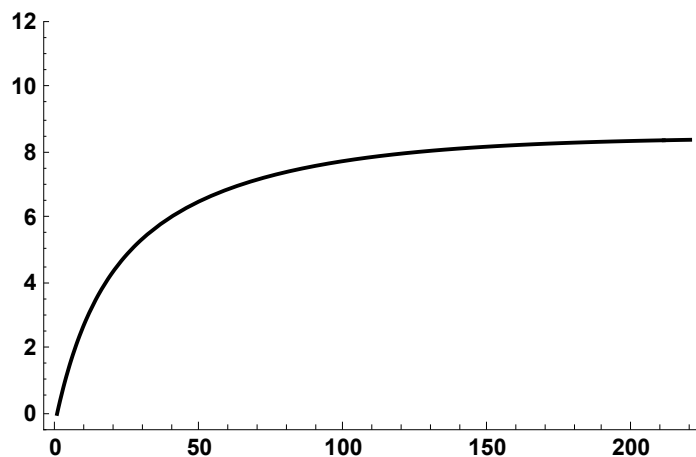

```

SPh05p002s05S = ErrorListPlot[SSh05p002s05S,
  PlotStyle → {Black, PointSize[0.02]}, PlotRange → {{0, 220}, {0, 12}}]

```

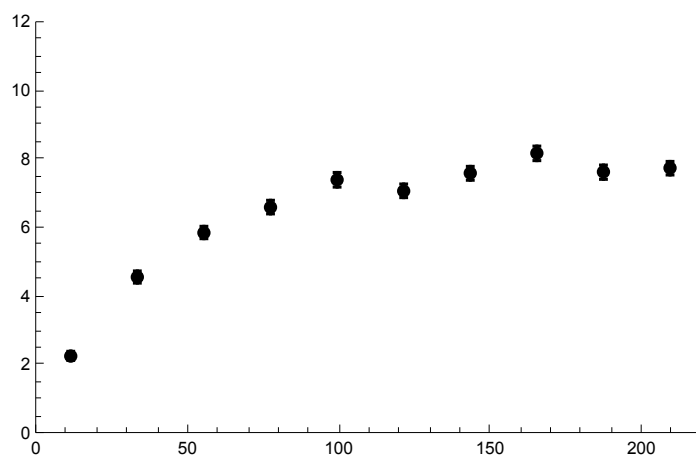

```
Show[SSPh05p002s05, SPh05p002s05S]
```

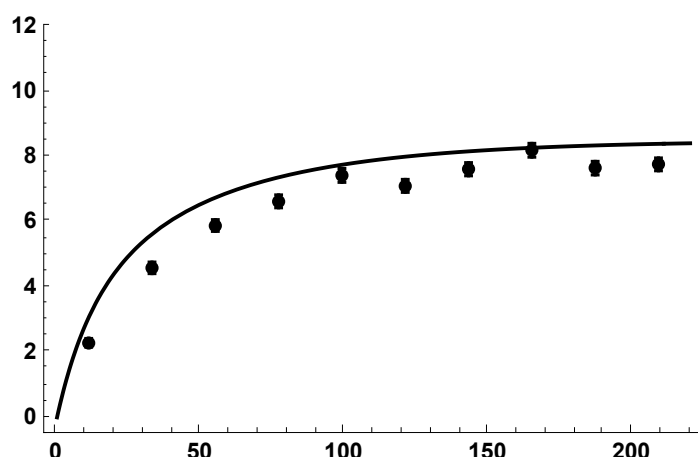

```
h = 0.1
```

```
SSh01p002s05 =
```

```
  Import["SLIM_F033/StatsProc_R_220_h_0.1_self_0.5_f_0.02_10b_SLIM.dat",
    "Table"][[1]];

```

```
SSh01p002s05CIB = Import[
```

```
  "SLIM_F033/StatsProc_R_220_h_0.1_self_0.5_f_0.02_10b_SLIM.dat",
  "Table"][[2]];

```

```
SSh01p002s05CIT = Import[
```

```
  "SLIM_F033/StatsProc_R_220_h_0.1_self_0.5_f_0.02_10b_SLIM.dat",
  "Table"][[3]];

```

```
SSh01p002s05S = Partition[Riffle[Partition[Riffle[Rin, SSh01p002s05], 2],
```

```
  Map[ErrorBar, Partition[Riffle[-SSh01p002s05CIB, SSh01p002s05CIT], 2]], 2];

```

```
SSPh01p002s05 = Plot[{ESS2[5000, 0.5, 0.05, 0.1, R,  $\frac{4}{1 + \frac{1}{3}}$ , 0.02, 10]},
```

```
  {R, 0, 220}, PlotStyle -> {{Red, Thick}},
```

```
  PlotRange -> {All, {-0.5, 12}}, Frame -> {{True, False}, {True, False}},
```

```
  BaseStyle -> {FontWeight -> "Bold", FontColor -> Black, FontSize -> 12}]

```

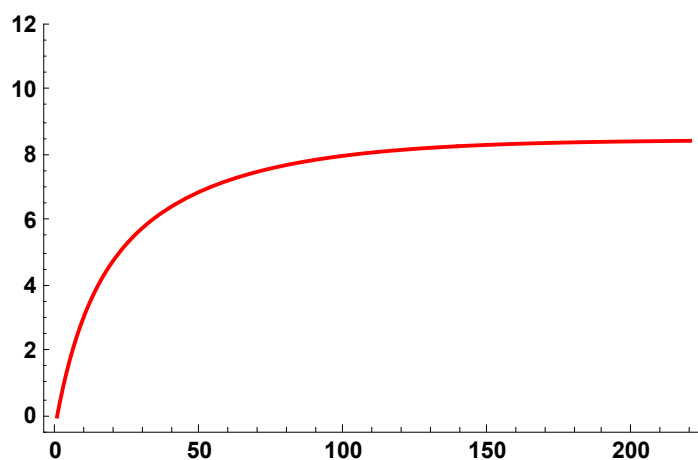



```
SPh01p002s05S = ErrorListPlot[SSh01p002s05S,
  PlotStyle → {Red, PointSize[0.02]}, PlotRange → {{0, 220}, {0, 12}}]
```

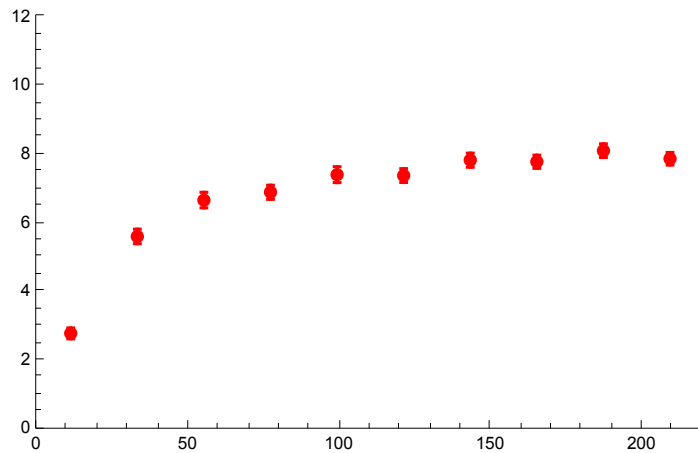

```
Show[SPh01p002s05S, SSh01p002s05S]
```

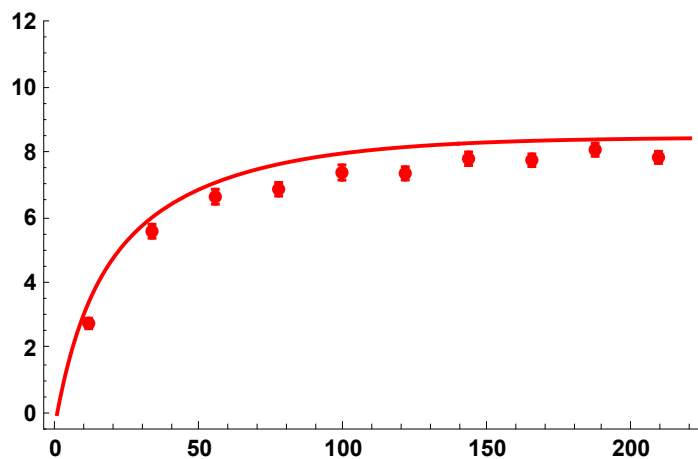

```
h = 0.9
```

```
SSh09p002s05 =
  Import["SLIM_F033/StatsProc_R_220_h_0.9_self_0.5_f_0.02_10b_SLIM.dat",
    "Table"][[1]];
SSh09p002s05CIB = Import[
  "SLIM_F033/StatsProc_R_220_h_0.9_self_0.5_f_0.02_10b_SLIM.dat",
  "Table"][[2]];
SSh09p002s05CIT = Import[
  "SLIM_F033/StatsProc_R_220_h_0.9_self_0.5_f_0.02_10b_SLIM.dat",
  "Table"][[3]];
SSh09p002s05S = Partition[Riffle[Partition[Riffle[Rin, SSh09p002s05], 2],
  Map[ErrorBar, Partition[Riffle[-SSh09p002s05CIB, SSh09p002s05CIT], 2]], 2];
```

```
SSPh09p002s05 = Plot[{{ESS2[5000, 0.5, 0.05, 0.9, R,  $\frac{4}{1 + \frac{1}{3}}$ , 0.02, 10]}},
  {R, 0, 220}, PlotStyle -> {{Blue, Thick}},
  PlotRange -> {All, {-0.5, 12}}, Frame -> {{True, False}, {True, False}},
  BaseStyle -> {FontWeight -> "Bold", FontColor -> Black, FontSize -> 12}]
```

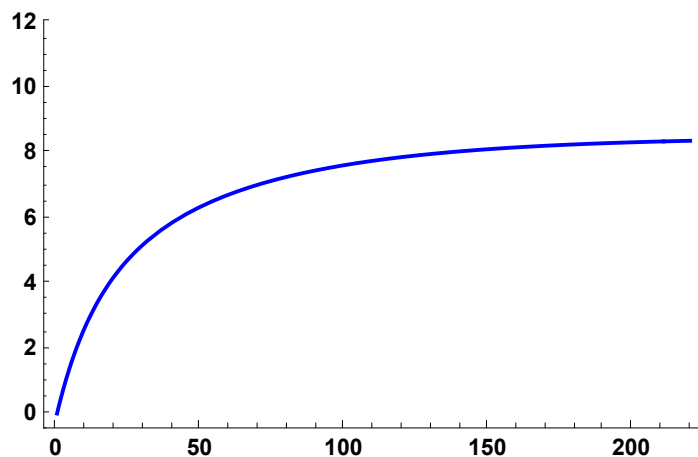

```
SPh09p002s05S = ErrorListPlot[SSh09p002s05S,
  PlotStyle -> {Blue, PointSize[0.02]}, PlotRange -> {{0, 220}, {0, 12}}]
```

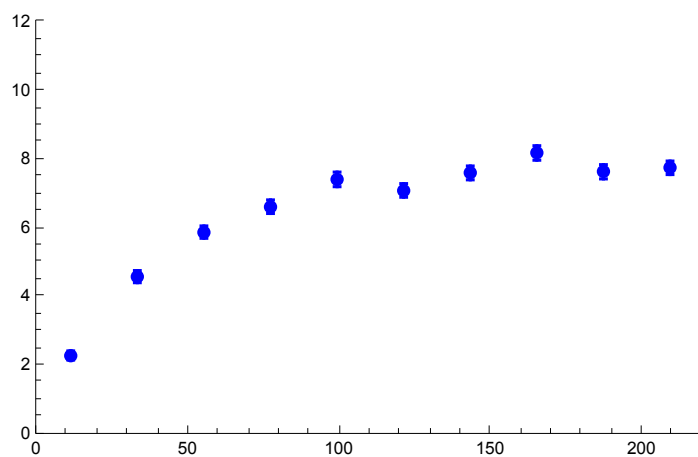

```
Show[SSPh09p002s05, SPh09p002s05S]
```

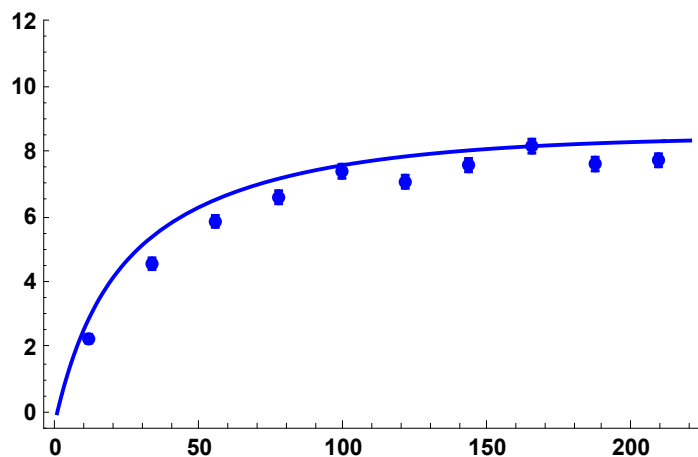

All results together

```
SimSegSitess052pc = Show[SSPh01p002s05, SPh01p002s05S, SSPh05p002s05,
  SPh05p002s05S, SSPh09p002s05, SPh09p002s05S, ImageSize → 200]
```

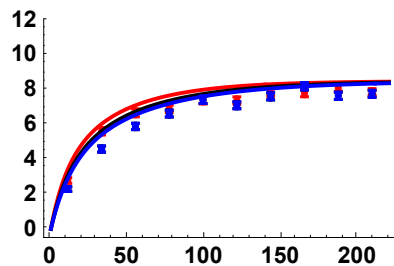

## Simulation comparisons, $p_0 = 0.05$

$h = 0.5$

```
SSh05p005s05 =
  Import["SLIM_F033/StatsProc_R_220_h_0.5_self_0.5_f_0.05_10b_SLIM.dat",
    "Table"][[1]];
SSh05p005s05CIB = Import[
  "SLIM_F033/StatsProc_R_220_h_0.5_self_0.5_f_0.05_10b_SLIM.dat",
  "Table"][[2]];
SSh05p005s05CIT = Import[
  "SLIM_F033/StatsProc_R_220_h_0.5_self_0.5_f_0.05_10b_SLIM.dat",
  "Table"][[3]];
SSh05p005s05S = Partition[Riffle[Partition[Riffle[Rin, SSh05p005s05], 2],
  Map[ErrorBar, Partition[Riffle[-SSh05p005s05CIB, SSh05p005s05CIT], 2]]], 2];

SSPh05p005s05 = Plot[{{ESS2[5000, 0.5, 0.05, 0.5, R,  $\frac{4}{1 + \frac{1}{3}}$ , 0.05, 10]}},
  {R, 0, 220}, PlotStyle → {{Black, Thick}},
  PlotRange → {All, {-0.5, 12}}, Frame → {{True, False}, {True, False}},
  BaseStyle → {FontWeight → "Bold", FontColor → Black, FontSize → 12}]
```

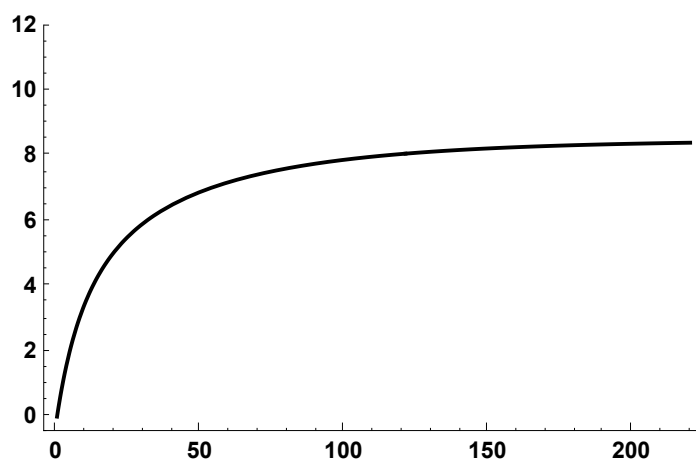

```
SPh05p005s05S = ErrorListPlot[SSh05p005s05S,
  PlotStyle -> {Black, PointSize[0.02]}, PlotRange -> {{0, 220}, {0, 12}}]
```

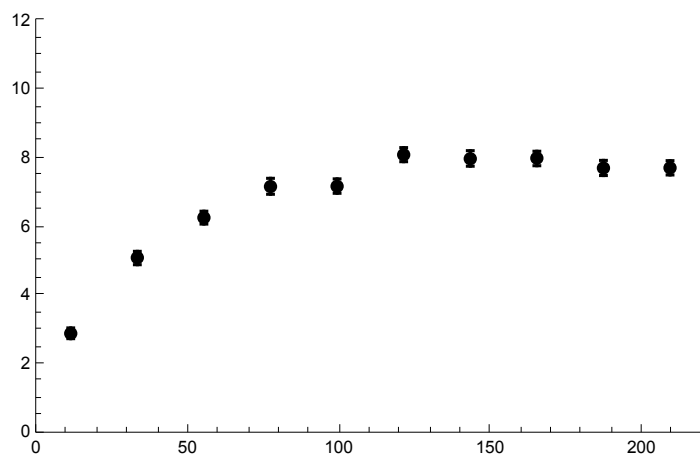

```
Show[SSPh05p005s05, SPh05p005s05S]
```

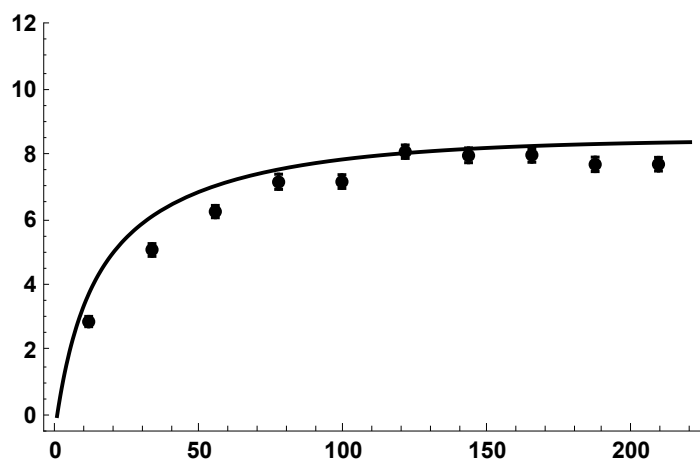

$h = 0.1$

```
SSh01p005s05 =
  Import["SLIM_F033/StatsProc_R_220_h_0.1_self_0.5_f_0.05_10b_SLIM.dat",
    "Table"][[1]];
SSh01p005s05CIB = Import[
  "SLIM_F033/StatsProc_R_220_h_0.1_self_0.5_f_0.05_10b_SLIM.dat",
  "Table"][[2]];
SSh01p005s05CIT = Import[
  "SLIM_F033/StatsProc_R_220_h_0.1_self_0.5_f_0.05_10b_SLIM.dat",
  "Table"][[3]];
SSh01p005s05S = Partition[Riffle[Partition[Riffle[Rin, SSh01p005s05], 2],
  Map[ErrorBar, Partition[Riffle[-SSh01p005s05CIB, SSh01p005s05CIT], 2]], 2];
```

```
SSPh01p005s05 = Plot[ $\left\{ \text{ESS2}\left[5000, 0.5, 0.05, 0.1, R, \frac{4}{1 + \frac{1}{3}}, 0.05, 10\right] \right\}$ ,
  {R, 0, 220}, PlotStyle → {{Red, Thick}},
  PlotRange → {All, {-0.5, 12}}, Frame → {{True, False}, {True, False}},
  BaseStyle → {FontWeight → "Bold", FontColor → Black, FontSize → 12}]
```

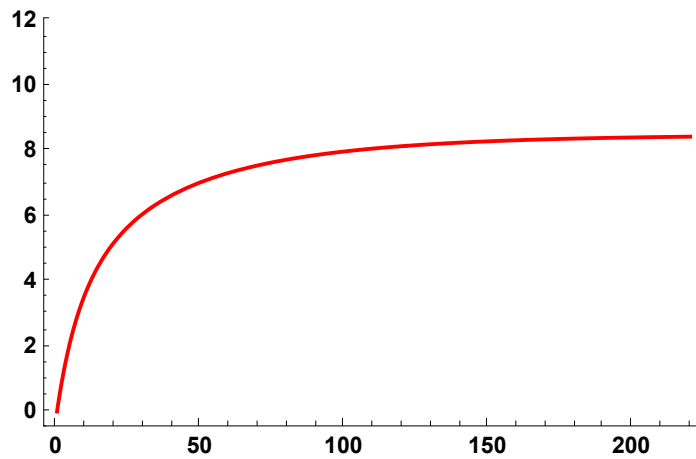

```
SPh01p005s05S = ErrorListPlot[SSh01p005s05S,
  PlotStyle → {Red, PointSize[0.02]}, PlotRange → {{0, 220}, {0, 12}}]
```

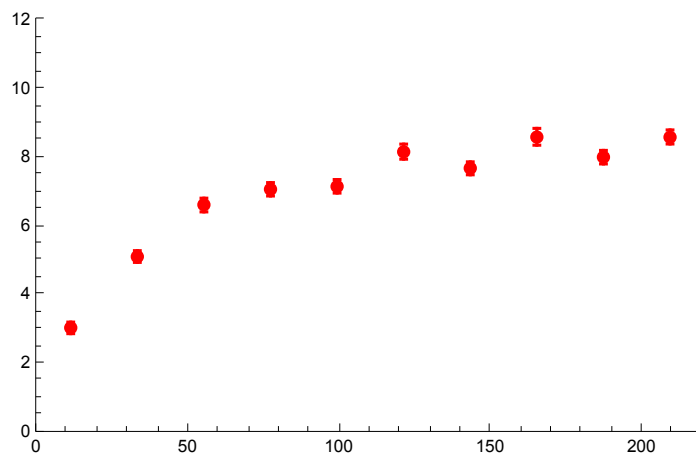

```
Show[SSPh01p005s05, SPh01p005s05S]
```

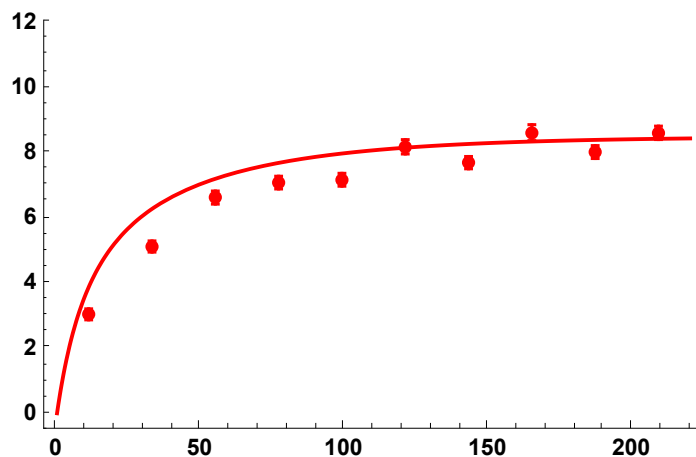

h=0.9

```

SSh09p005s05 =
  Import["SLIM_F033/StatsProc_R_220_h_0.9_self_0.5_f_0.05_10b_SLIM.dat",
    "Table"][[1]];
SSh09p005s05CIB = Import[
  "SLIM_F033/StatsProc_R_220_h_0.9_self_0.5_f_0.05_10b_SLIM.dat",
  "Table"][[2]];
SSh09p005s05CIT = Import[
  "SLIM_F033/StatsProc_R_220_h_0.9_self_0.5_f_0.05_10b_SLIM.dat",
  "Table"][[3]];
SSh09p005s05S = Partition[Riffle[Partition[Riffle[Rin, SSh09p005s05], 2],
  Map[ErrorBar, Partition[Riffle[-SSh09p005s05CIB, SSh09p005s05CIT], 2]]], 2];

SSPh09p005s05 = Plot[ $\left\{ \text{ESS2}\left[5000, 0.5, 0.05, 0.9, R, \frac{4}{1 + \frac{1}{3}}, 0.05, 10\right] \right\}$ ,
  {R, 0, 220}, PlotStyle → {{Blue, Thick}},
  PlotRange → {All, {0, 12}}, Frame → {{True, False}, {True, False}},
  BaseStyle → {FontWeight → "Bold", FontColor → Black, FontSize → 12}]

```

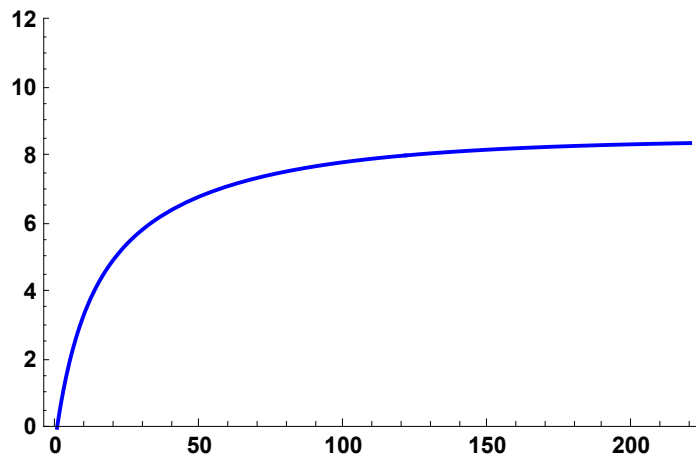

```

SPh09p005s05S = ErrorListPlot[SSh09p005s05S,
  PlotStyle → {Blue, PointSize[0.02]}, PlotRange → {{0, 220}, {0, 12}}]

```

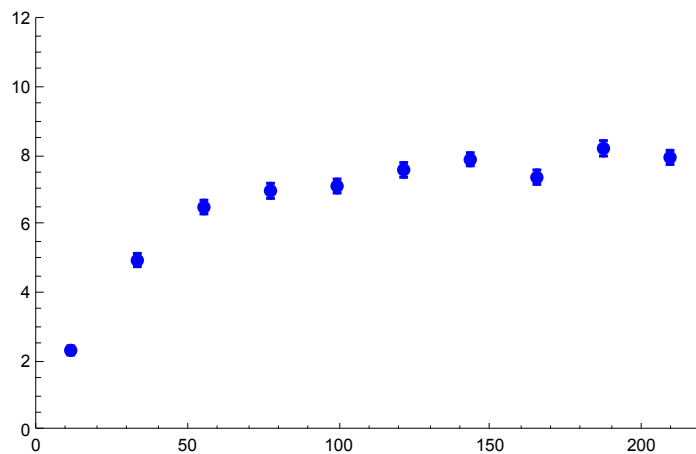

```
Show[SSPh09p005s05, SPh09p005s05S]
```

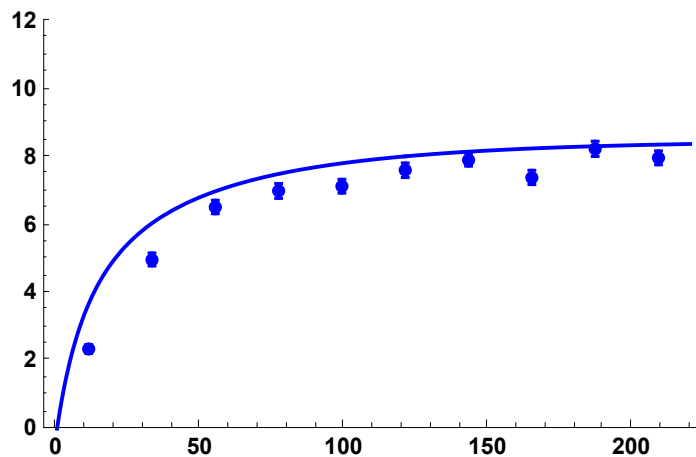

All results together

```
SimSegSittess055pc = Show[SSPh01p005s05, SPh01p005s05S, SSPh05p005s05,  
  SPh05p005s05S, SSPh09p005s05, SPh09p005s05S, ImageSize -> 200]
```

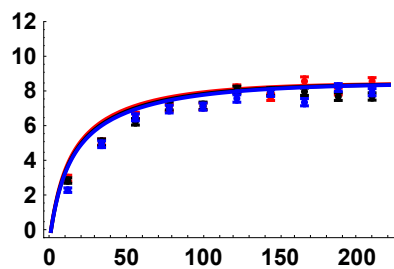

$\sigma = 0.95$  ( $F \approx 0.904$ )

Preliminaries

```
SetDirectory[NotebookDirectory[]];  
Rin = Table[100 + 200 * i, {i, 0, 9}];
```

Simulation comparisons, from initial frequency  $p_0 = 1/2 N$

$h = 0.5$

```
SSh05s095 =  
  Import["SLIM_F09/StatsProc_R_2000_h_0.5_self_0.95_f_1e-04_10b_SLIM.dat",  
    "Table"][[1]];  
SSh05s095CIB = Import[  
  "SLIM_F09/StatsProc_R_2000_h_0.5_self_0.95_f_1e-04_10b_SLIM.dat",  
  "Table"][[2]];  
SSh05s095CIT = Import[  
  "SLIM_F09/StatsProc_R_2000_h_0.5_self_0.95_f_1e-04_10b_SLIM.dat",  
  "Table"][[3]];  
SSh05s095S = Partition[Riffle[Partition[Riffle[Rin, SSh05s095], 2],  
  Map[ErrorBar, Partition[Riffle[-SSh05s095CIB, SSh05s095CIT], 2]]], 2];
```

```
Sh05s095 = Plot[
  {ESS2[5000, 0.95, 0.05, 0.5, R,  $\frac{4}{1 + \frac{0.95}{2-0.95}}$ , Boostp0[5000, 0.05, 0.5, 0.95], 10]},
  {R, 0, 2000}, PlotStyle → {{Black, Thick}},
  PlotRange → {All, {-0.5, 12}}, Frame → {{True, False}, {True, False}},
  BaseStyle → {FontWeight → "Bold", FontColor → Black, FontSize → 12}]
```

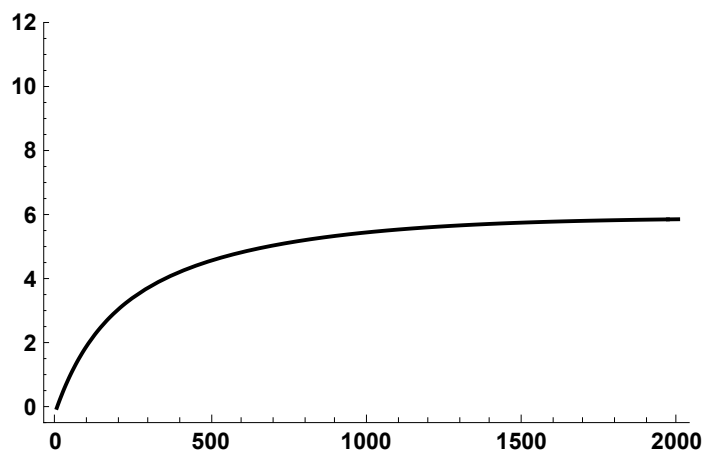

```
Sh05s095S = ErrorListPlot[SSh05s095S,
  PlotStyle → {Black, PointSize[0.02]}, PlotRange → {{0, 2000}, {0, 12}}]
```

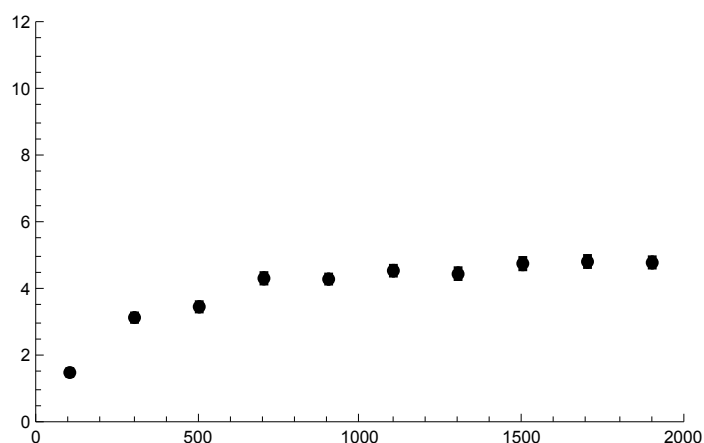

```
Show[Sh05s095, Sh05s095S]
```

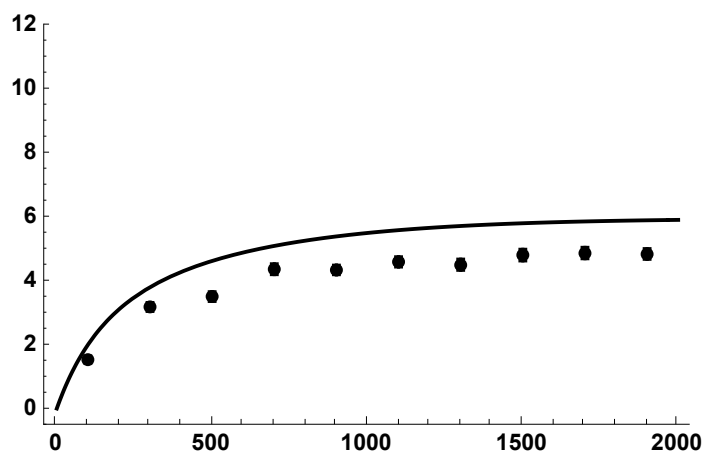



h=0.1

```

SSh01s095 =
  Import["SLIM_F09/StatsProc_R_2000_h_0.1_self_0.95_f_1e-04_10b_SLIM.dat",
    "Table"][[1]];
SSh01s095CIB = Import[
  "SLIM_F09/StatsProc_R_2000_h_0.1_self_0.95_f_1e-04_10b_SLIM.dat",
  "Table"][[2]];
SSh01s095CIT = Import[
  "SLIM_F09/StatsProc_R_2000_h_0.1_self_0.95_f_1e-04_10b_SLIM.dat",
  "Table"][[3]];
SSh01s095S = Partition[Riffle[Partition[Riffle[Rin, SSh01s095], 2],
  Map[ErrorBar, Partition[Riffle[-SSh01s095CIB, SSh01s095CIT], 2]]], 2];

Sh01s095 = Plot[
  {ESS2[5000, 0.95, 0.05, 0.1, R,  $\frac{4}{1 + \frac{0.95}{2-0.95}}$ , Boostp0[5000, 0.05, 0.1, 0.95], 10]},
  {R, 0, 2000},
  PlotStyle → {{Red, Thick}, {Red, Thick, Dashed}, {Red, Thick, Dashing[Large]}},
  PlotRange → {All, {-0.5, 12}}, Frame → {{True, False}, {True, False}},
  Frame → {{True, False}, {True, False}},
  BaseStyle → {FontWeight → "Bold", FontColor → Black, FontSize → 12}]

```

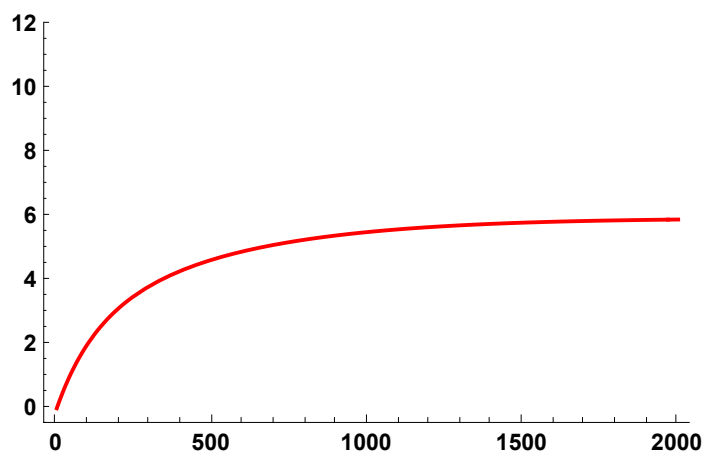

```
Sh01s095S = ErrorListPlot[SSh01s095S,
  PlotStyle → {Red, PointSize[0.02]}, PlotRange → {{0, 2000}, {0, 12}}]
```

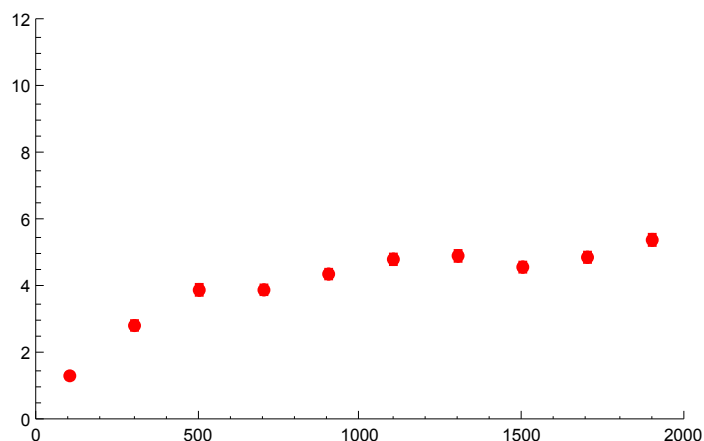

```
Show[Sh01s095, Sh01s095S]
```

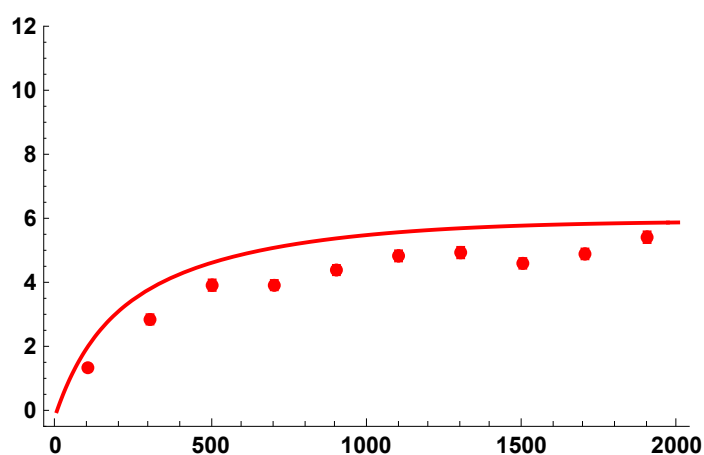

```
h = 0.9
```

```
SSh09s095 =
  Import["SLIM_F09/StatsProc_R_2000_h_0.9_self_0.95_f_1e-04_10b_SLIM.dat",
    "Table"][[1]];
SSh09s095CIB = Import[
  "SLIM_F09/StatsProc_R_2000_h_0.9_self_0.95_f_1e-04_10b_SLIM.dat",
  "Table"][[2]];
SSh09s095CIT = Import[
  "SLIM_F09/StatsProc_R_2000_h_0.9_self_0.95_f_1e-04_10b_SLIM.dat",
  "Table"][[3]];
SSh09s095S = Partition[Riffle[Partition[Riffle[Rin, SSh09s095], 2],
  Map[ErrorBar, Partition[Riffle[-SSh09s095CIB, SSh09s095CIT], 2]]], 2];
```

```
Sh09s095 = Plot[
  {ESS2[5000, 0.95, 0.05, 0.9, R,  $\frac{4}{1 + \frac{0.95}{2 - 0.95}}$ , Boostp0[5000, 0.05, 0.9, 0.95], 10]},
  {R, 0, 2000}, PlotStyle →
  {{Blue, Thick}, {Blue, Thick, Dashed}, {Blue, Thick, Dashing[Large]}}},
  PlotRange → {All, {-0.5, 12}}, Frame → {{True, False}, {True, False}},
  BaseStyle → {FontWeight → "Bold", FontColor → Black, FontSize → 12}]
```

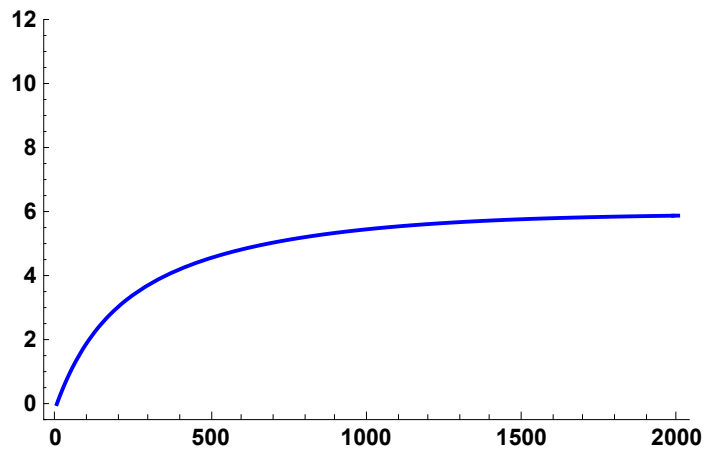

```
Sh09s095S = ErrorListPlot[SSh09s095S,
  PlotStyle → {Blue, PointSize[0.02]}, PlotRange → {{0, 2000}, {0, 12}}]
```

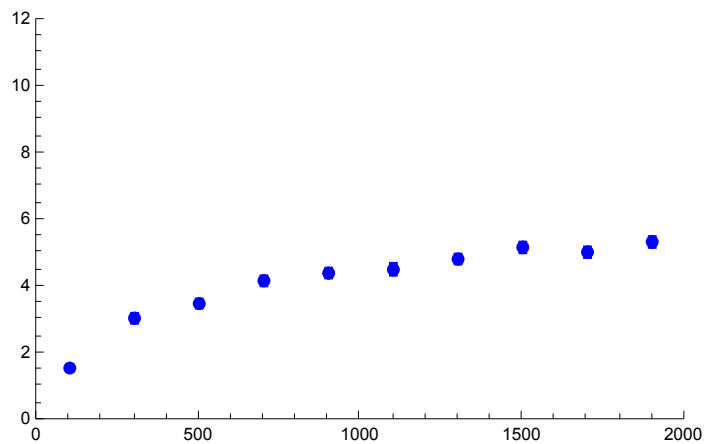

```
Show[Sh09s095, Sh09s095S]
```

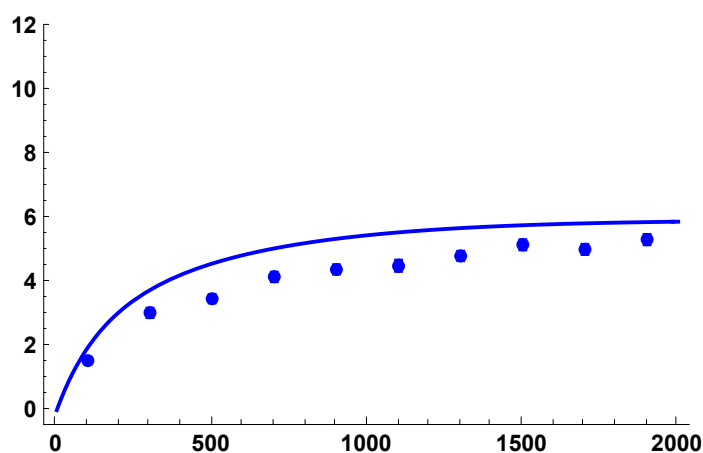

All results together

```
SimSegSitess095DN = Show[Sh01s095, Sh01s095S,  
  Sh05s095, Sh05s095S, Sh09s095, Sh09s095S, ImageSize -> 200]
```

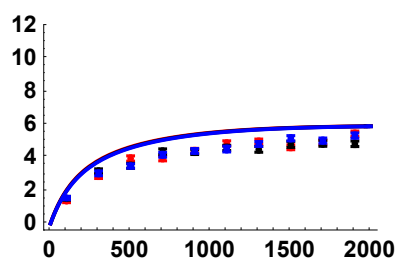

## Simulation comparisons, $p_0 = 0.02$

$h = 0.5$

```
SSh05p002s095 =  
  Import["SLIM_F09/StatsProc_R_2000_h_0.9_self_0.95_f_0.02_10b_SLIM.dat",  
    "Table"][[1]];  
SSh05p002s095CIB = Import[  
  "SLIM_F09/StatsProc_R_2000_h_0.9_self_0.95_f_0.02_10b_SLIM.dat",  
  "Table"][[2]];  
SSh05p002s095CIT = Import[  
  "SLIM_F09/StatsProc_R_2000_h_0.9_self_0.95_f_0.02_10b_SLIM.dat",  
  "Table"][[3]];  
SSh05p002s095S = Partition[Riffle[Partition[Riffle[Rin, SSh05p002s095], 2], Map[  
  ErrorBar, Partition[Riffle[-SSh05p002s095CIB, SSh05p002s095CIT], 2]]], 2];
```

```
SSPh05p002s095 = Plot[ $\left\{ \text{ESS2}\left[5000, 0.95, 0.05, 0.5, R, \frac{4}{1 + \frac{0.95}{2-0.95}}, 0.02, 10\right] \right\},$ 
  {R, 0, 2000}, PlotStyle → {{Black, Thick}},
  PlotRange → {All, {-0.5, 12}}, Frame → {{True, False}, {True, False}},
  BaseStyle → {FontWeight → "Bold", FontColor → Black, FontSize → 12}]
```

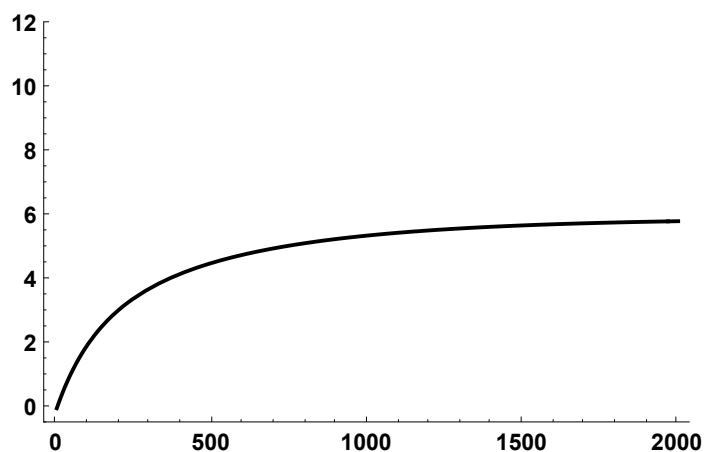

```
SPh05p002s095S = ErrorListPlot[SSh05p002s095S,
  PlotStyle → {Black, PointSize[0.02]}, PlotRange → {{0, 2000}, {0, 12}}]
```

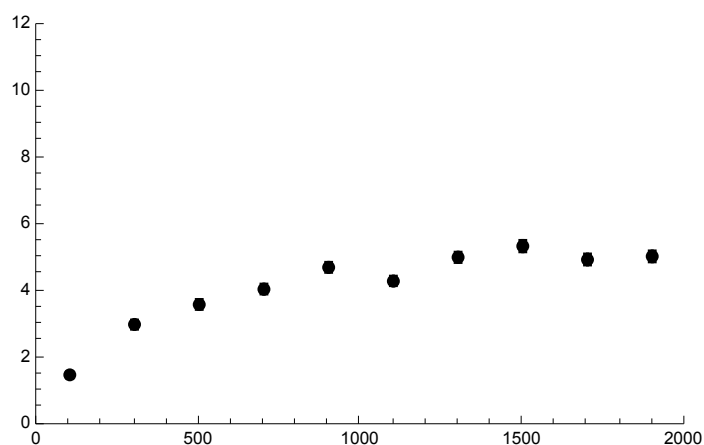

```
Show[SSPh05p002s095, SPh05p002s095S]
```

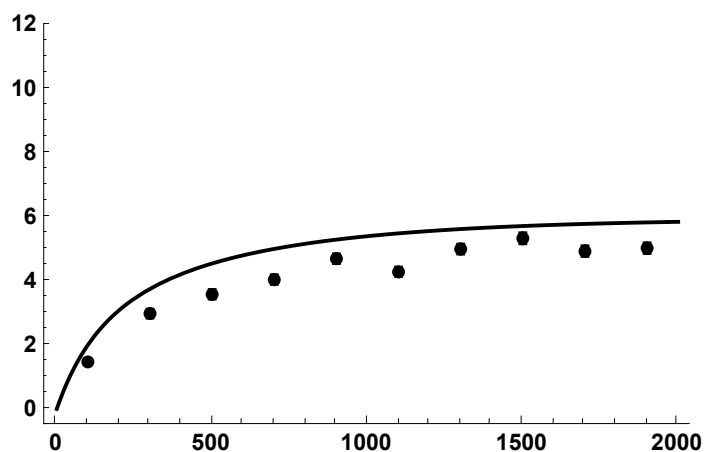

$h = 0.1$

```

SSh01p002s095 =
  Import["SLIM_F09/StatsProc_R_2000_h_0.1_self_0.95_f_0.02_10b_SLIM.dat",
    "Table"][[1]];
SSh01p002s095CIB = Import[
  "SLIM_F09/StatsProc_R_2000_h_0.1_self_0.95_f_0.02_10b_SLIM.dat",
  "Table"][[2]];
SSh01p002s095CIT = Import[
  "SLIM_F09/StatsProc_R_2000_h_0.1_self_0.95_f_0.02_10b_SLIM.dat",
  "Table"][[3]];
SSh01p002s095S = Partition[Riffle[Partition[Riffle[Rin, SSh01p002s095], 2], Map[
  ErrorBar, Partition[Riffle[-SSh01p002s095CIB, SSh01p002s095CIT], 2]]], 2];

SSPh01p002s095 = Plot[ $\left\{ \text{ESS2}\left[5000, 0.95, 0.05, 0.1, R, \frac{4}{1 + \frac{0.95}{2-0.95}}, 0.02, 10\right] \right\}$ ,
  {R, 0, 2000}, PlotStyle → {{Red, Thick}},
  PlotRange → {All, {-0.5, 12}}, Frame → {{True, False}, {True, False}},
  BaseStyle → {FontWeight → "Bold", FontColor → Black, FontSize → 12}]

```

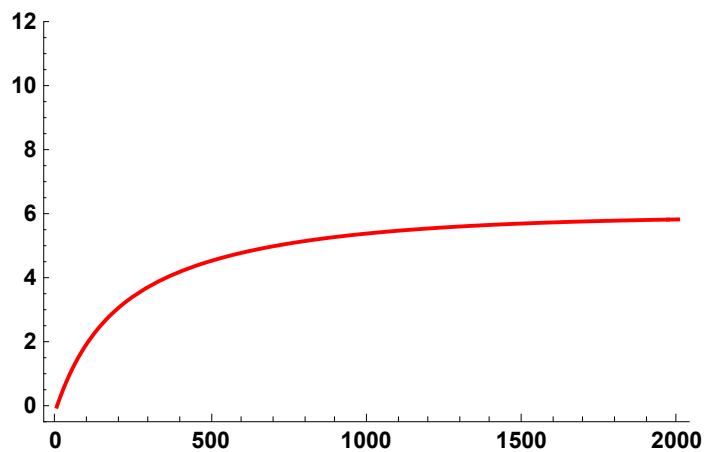

```

SPh01p002s095S = ErrorListPlot[SSh01p002s095S,
  PlotStyle → {Red, PointSize[0.02]}, PlotRange → {{0, 2000}, {0, 12}}]

```

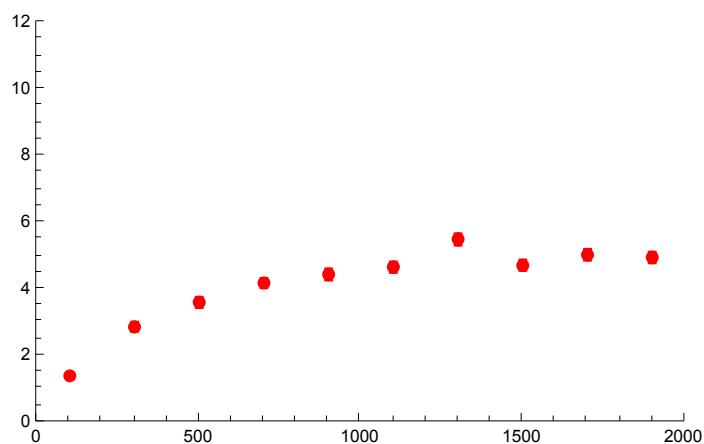

```
Show[SSPh01p002s095, SPh01p002s095S]
```

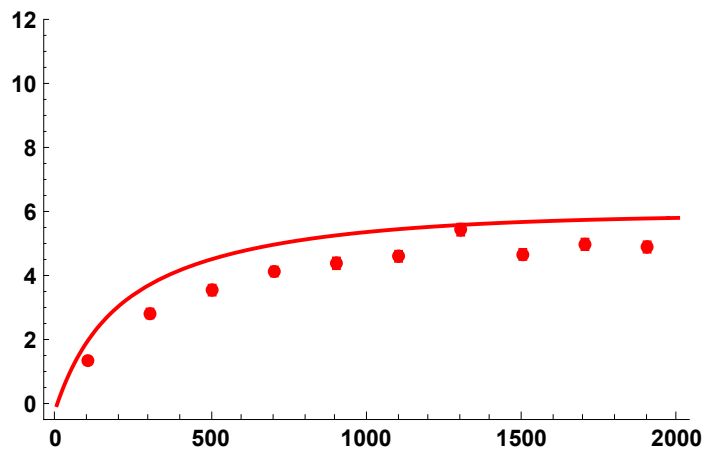

```
h = 0.9
```

```
SSh09p002s095 =
```

```
  Import["SLIM_F09/StatsProc_R_2000_h_0.9_self_0.95_f_0.02_10b_SLIM.dat",
    "Table"][[1]];

```

```
SSh09p002s095CIB = Import[
```

```
  "SLIM_F09/StatsProc_R_2000_h_0.9_self_0.95_f_0.02_10b_SLIM.dat",
  "Table"][[2]];

```

```
SSh09p002s095CIT = Import[
```

```
  "SLIM_F09/StatsProc_R_2000_h_0.9_self_0.95_f_0.02_10b_SLIM.dat",
  "Table"][[3]];

```

```
SSh09p002s095S = Partition[Riffle[Partition[Riffle[Rin, SSh09p002s095], 2], Map[
  ErrorBar, Partition[Riffle[-SSh09p002s095CIB, SSh09p002s095CIT], 2]]], 2];

```

```
SSPh09p002s095 = Plot[{{ESS2[5000, 0.95, 0.05, 0.9, R,  $\frac{4}{1 + \frac{0.95}{2-0.95}}$ , 0.02, 10]}},
```

```
  {R, 0, 2000}, PlotStyle -> {{Blue, Thick}},
```

```
  PlotRange -> {All, {-0.5, 12}}, Frame -> {{True, False}, {True, False}},
```

```
  BaseStyle -> {FontWeight -> "Bold", FontColor -> Black, FontSize -> 12}]

```

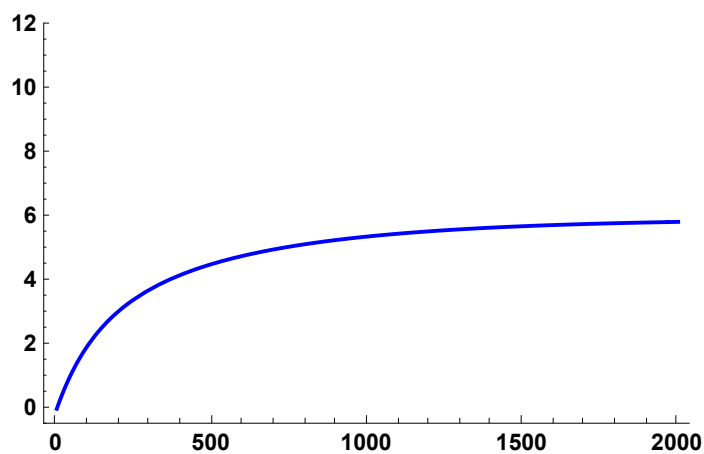

```
SPh09p002s095S = ErrorListPlot[SSh09p002s095S,
  PlotStyle -> {Blue, PointSize[0.02]}, PlotRange -> {{0, 2000}, {0, 12}}]
```

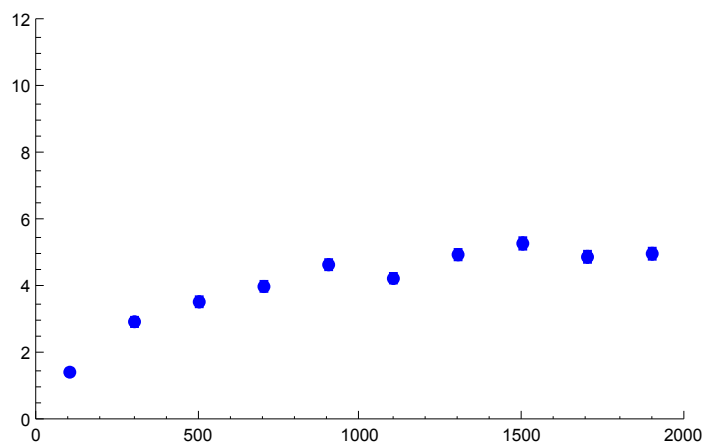

```
Show[SSPh09p002s095, SPh09p002s095S]
```

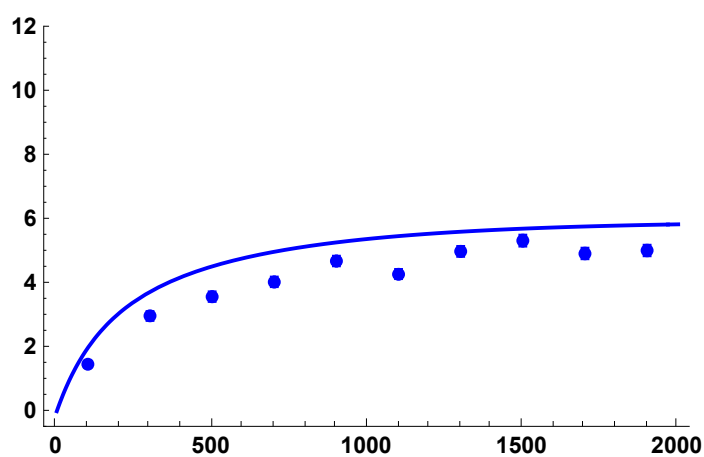

All results together

```
SimSegSitess0952pc = Show[SSPh01p002s095, SPh01p002s095S, SSPh05p002s095,
  SPh05p002s095S, SSPh09p002s095, SPh09p002s095S, ImageSize -> 200]
```

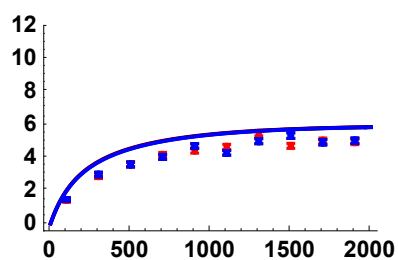

Simulation comparisons,  $p_0 = 0.05$

$h = 0.5$



```

SSh05p005s095 =
  Import["SLIM_F09/StatsProc_R_2000_h_0.5_self_0.95_f_0.05_10b_SLIM.dat",
    "Table"][[1]];
SSh05p005s095CIB = Import[
  "SLIM_F09/StatsProc_R_2000_h_0.5_self_0.95_f_0.05_10b_SLIM.dat",
  "Table"][[2]];
SSh05p005s095CIT = Import[
  "SLIM_F09/StatsProc_R_2000_h_0.5_self_0.95_f_0.05_10b_SLIM.dat",
  "Table"][[3]];
SSh05p005s095S = Partition[Riffle[Partition[Riffle[Rin, SSh05p005s095], 2], Map[
  ErrorBar, Partition[Riffle[-SSh05p005s095CIB, SSh05p005s095CIT], 2]], 2];

SSPh05p005s095 = Plot[ $\left\{ \text{ESS2}\left[5000, 0.95, 0.05, 0.5, R, \frac{4}{1 + \frac{0.95}{2-0.95}}, 0.05, 10\right] \right\}$ ,
  {R, 0, 2000}, PlotStyle → {{Black, Thick}},
  PlotRange → {All, {-0.5, 12}}, Frame → {{True, False}, {True, False}},
  BaseStyle → {FontWeight → "Bold", FontColor → Black, FontSize → 12}]

```

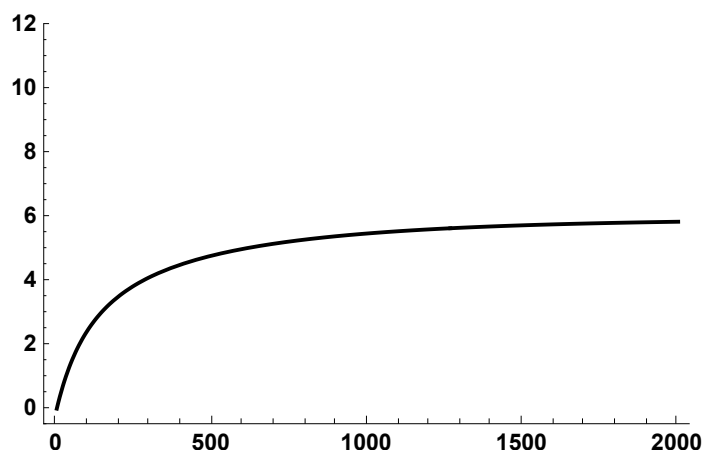

```

SPh05p005s095S = ErrorListPlot[SSh05p005s095S,
  PlotStyle → {Black, PointSize[0.02]}, PlotRange → {{0, 2000}, {0, 12}}]

```

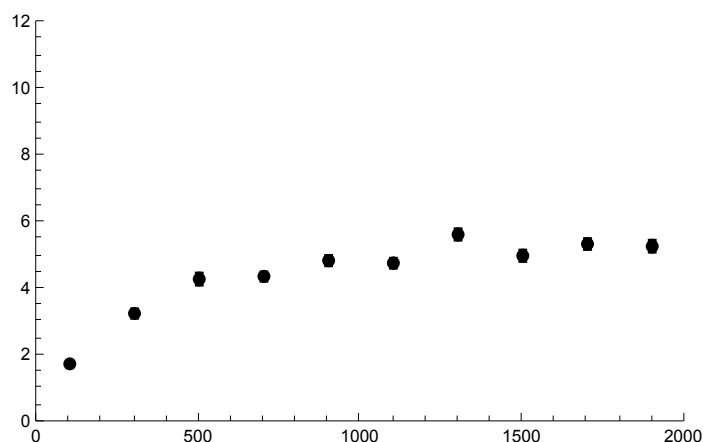

```
Show[SSPh05p005s095, SPh05p005s095S]
```

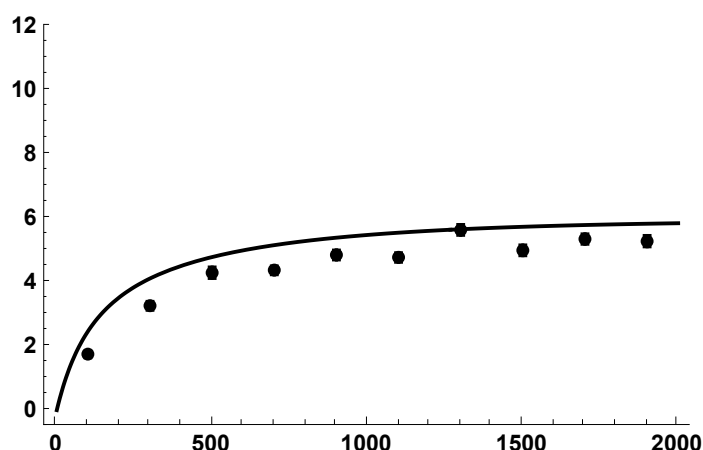

```
h = 0.1
```

```
SSh01p005s095 =
```

```
  Import["SLIM_F09/StatsProc_R_2000_h_0.1_self_0.95_f_0.05_10b_SLIM.dat",
    "Table"][[1]];

```

```
SSh01p005s095CIB = Import[
```

```
  "SLIM_F09/StatsProc_R_2000_h_0.1_self_0.95_f_0.05_10b_SLIM.dat",
  "Table"][[2]];

```

```
SSh01p005s095CIT = Import[
```

```
  "SLIM_F09/StatsProc_R_2000_h_0.1_self_0.95_f_0.05_10b_SLIM.dat",
  "Table"][[3]];

```

```
SSh01p005s095S = Partition[Riffle[Partition[Riffle[Rin, SSh01p005s095], 2], Map[
  ErrorBar, Partition[Riffle[-SSh01p005s095CIB, SSh01p005s095CIT], 2]], 2];

```

```
SSPh01p005s095 = Plot[ $\left\{ \text{ESS2}\left[5000, 0.95, 0.05, 0.1, R, \frac{4}{1 + \frac{0.95}{2 - 0.95}}, 0.05, 10\right] \right\},$ 
```

```
  {R, 0, 2000}, PlotStyle → {{Red, Thick}},
```

```
  PlotRange → {All, {-0.5, 12}}, Frame → {{True, False}, {True, False}},
```

```
  BaseStyle → {FontWeight → "Bold", FontColor → Black, FontSize → 12}]

```

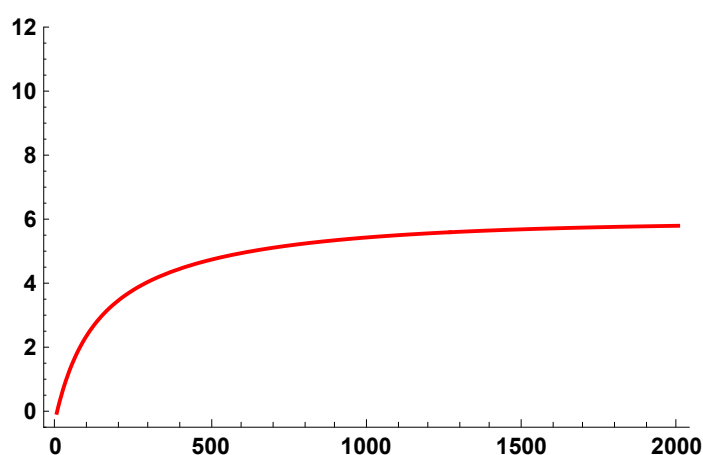

```
SPh01p005s095S = ErrorListPlot[SSh01p005s095S,
  PlotStyle → {Red, PointSize[0.02]}, PlotRange → {{0, 2000}, {0, 12}}]
```

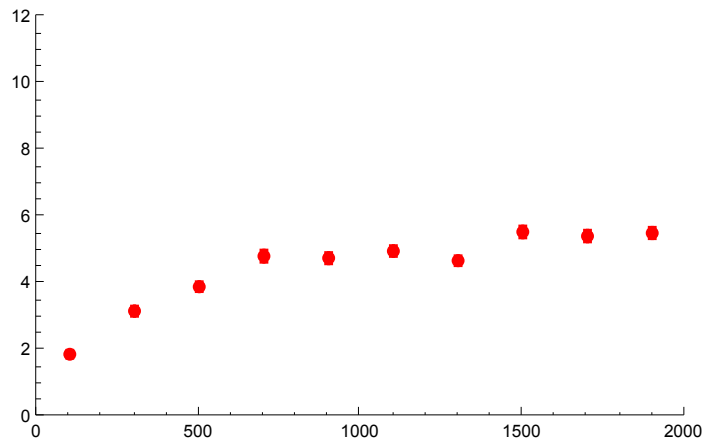

```
Show[SSh01p005s095, SPh01p005s095S]
```

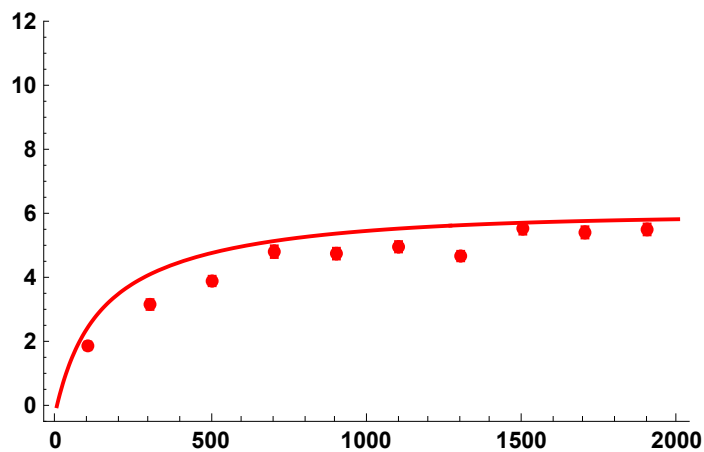

h = 0.9

```
SSh09p005s095 =
  Import["SLIM_F09/StatsProc_R_2000_h_0.9_self_0.95_f_0.05_10b_SLIM.dat",
    "Table"][[1]];
SSh09p005s095CIB = Import[
  "SLIM_F09/StatsProc_R_2000_h_0.9_self_0.95_f_0.05_10b_SLIM.dat",
  "Table"][[2]];
SSh09p005s095CIT = Import[
  "SLIM_F09/StatsProc_R_2000_h_0.9_self_0.95_f_0.05_10b_SLIM.dat",
  "Table"][[3]];
SSh09p005s095S = Partition[Riffle[Partition[Riffle[Rin, SSh09p005s095], 2], Map[
  ErrorBar, Partition[Riffle[-SSh09p005s095CIB, SSh09p005s095CIT], 2]]], 2];
```

```
SSPh09p005s095 = Plot[ $\left\{ \text{ESS2}\left[5000, 0.95, 0.05, 0.9, R, \frac{4}{1 + \frac{0.95}{2-0.95}}, 0.05, 10\right] \right\},$ 
  {R, 0, 2000}, PlotStyle → {{Blue, Thick}},
  PlotRange → {All, {-0.5, 12}}, Frame → {{True, False}, {True, False}},
  BaseStyle → {FontWeight → "Bold", FontColor → Black, FontSize → 12}]
```

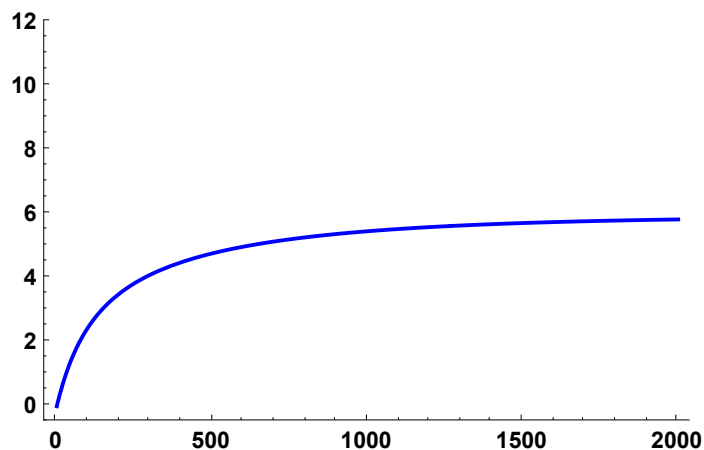

```
SPh09p005s095S = ErrorListPlot[Ssh09p005s095S,
  PlotStyle → {Blue, PointSize[0.02]}, PlotRange → {{0, 2000}, {0, 12}}]
```

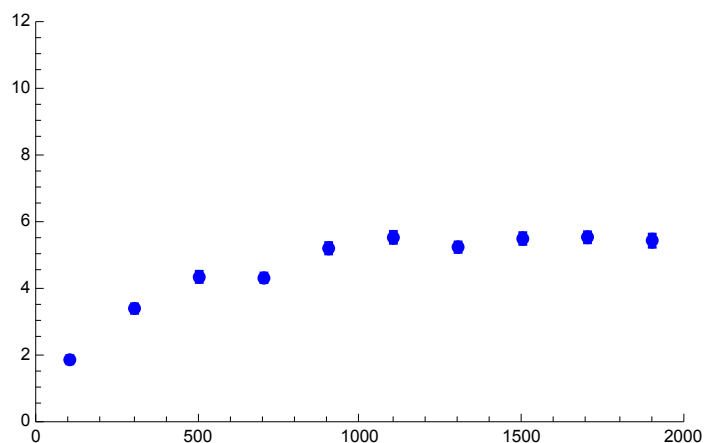

```
Show[SSPh09p005s095, SPh09p005s095S]
```

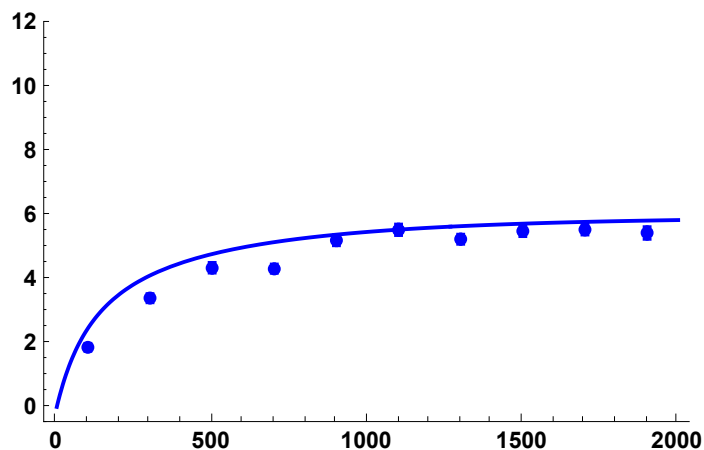

All results together

```
SimSegSitess0955pc = Show[SSPh01p005s095, SPh01p005s095S, SSPh05p005s095,  
  SPh05p005s095S, SSPh09p005s095, SPh09p005s095S, ImageSize -> 200]
```

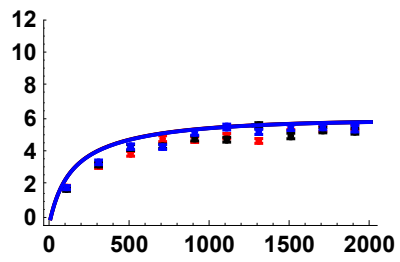

## Grid of key results

### Comparing analytical results and SLiM simulations

```

SimCompSegSites = Labeled[
  Grid[{{Text@TraditionalForm@Style[" $p_0 = 1/2N$ ", 24], Text@TraditionalForm@
    Style[" $p_0 = 0.02$ ", 24], Text@TraditionalForm@Style[" $p_0 = 0.05$ ", 24]},},
    {SimSegSitess0DN, SimSegSitess02pc, SimSegSitess05pc,
      Text@TraditionalForm@Style[" $\sigma = 0.00 \backslash n (F = 0.00)$ ", 24]},
    {SimSegSitess05DN, SimSegSitess052pc, SimSegSitess055pc,
      Text@TraditionalForm@Style[" $\sigma = 0.50 \backslash n (F \approx 0.33)$ ", 24]},
    {SimSegSitess095DN, SimSegSitess0952pc, SimSegSitess0955pc, Text@
      TraditionalForm@Style[" $\sigma = 0.95 \backslash n (F \approx 0.90)$ ", 24]}}, Spacings -> {2, 1}],
  {Text@TraditionalForm@Style["Number of\nSegregating\nSites", 24],
    Text@TraditionalForm@Style["Scaled Recombination Rate,  $2Nr$ ", 24]}, {Left,
    Bottom}]

```

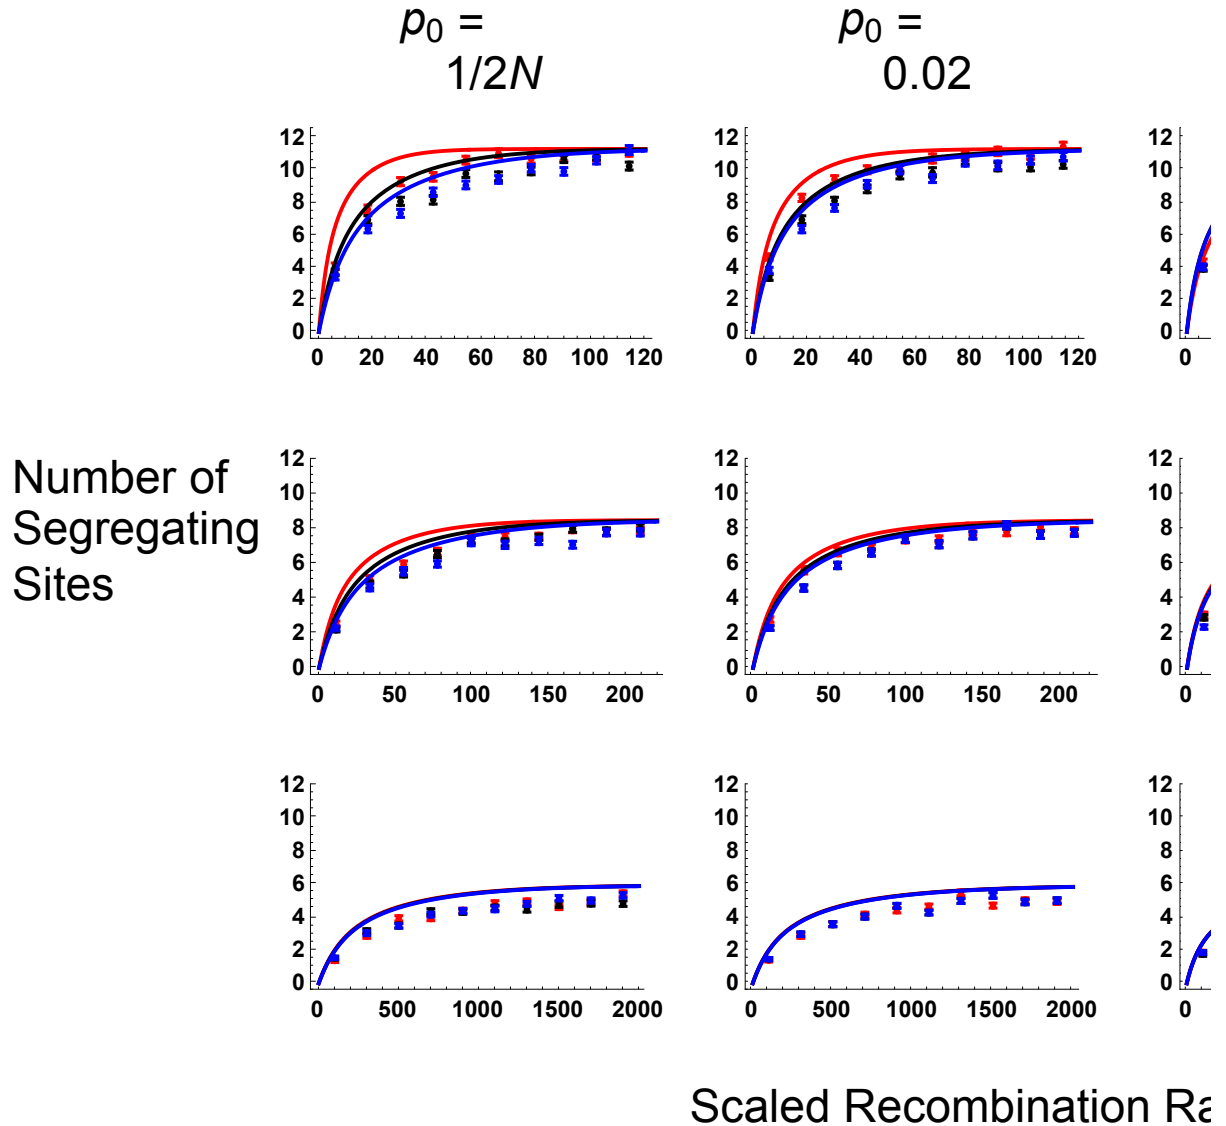

## Comparing SLiM and MSMS simulations ( $\sigma = 0$ )

```
SLiMandMSMSResSegSites = Labeled[
  Grid[{{Text@TraditionalForm@Style["h = 0.1", 24, TextAlignment → Center],
    Text@TraditionalForm@Style["h = 0.5", 24], Text@
    TraditionalForm@Style["h = 0.9", 24]},}, {Text@TraditionalForm@Style[
    "Red points: forward-in-time\nPink points: coalescent simulations",
    14, TextAlignment → Center], Text@TraditionalForm@Style[
    "Black points: forward-in-time\nGrey points: coalescent simulations",
    14, TextAlignment → Center], Text@TraditionalForm@Style[
    "Blue points: forward-in-time\nCyan points: coalescent simulations",
    14, TextAlignment → Center]},},
  {h01MSMSSegsites, h05MSMSSegsites, h09MSMSSegsites,
    Text@TraditionalForm@Style[" $p_0 = 1/2N$ ", 24]},
  {h01MSMS2pcSegsites, h05MSMS2pcSegsites, h09MSMS2pcSegsites,
    Text@TraditionalForm@Style[" $p_0 = 0.02$ ", 24]},
  {h01MSMS5pcSegSites, h05MSMS5pcSegSites, h09MSMS5pcSegSites,
    Text@TraditionalForm@Style[" $p_0 = 0.05$ ", 24]}}, Spacings → {2, 1}},
  {Text@TraditionalForm@Style["Number of\nSegregating\nSites", 24],
    Text@TraditionalForm@Style["Scaled Recombination Rate,  $2Nr$ ", 24]}, {Left,
    Bottom}]
```

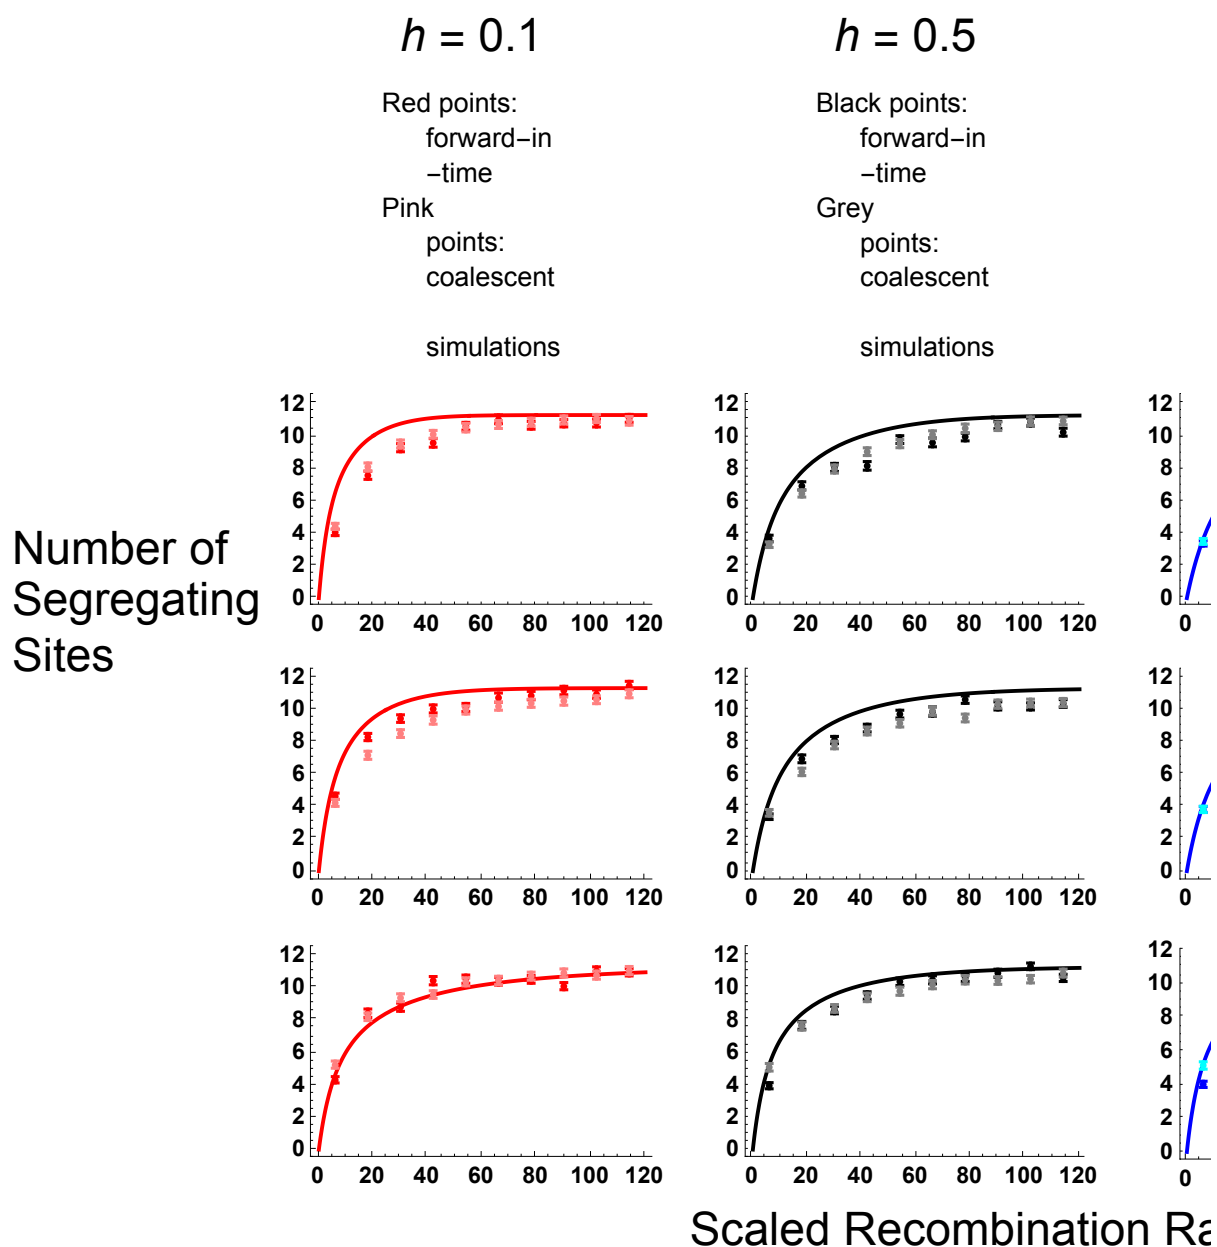

## Section E: Simulation comparisons, Site Frequency Spectrum

Setting working directory (to enable reading in of files)

```
SetDirectory[NotebookDirectory[]];
```

### Equations

The complete function, accounting for the different outcomes depending on  $i$ :



$$F[\sigma_] := \frac{\sigma}{2 - \sigma};$$

$$\Phi[r_, \sigma_] := \frac{\sigma (2 - \sigma - 2 (1 - r) r (2 - 3 \sigma))}{(2 - \sigma) (2 - (1 - 2 (1 - r) r) \sigma)};$$

$$\text{PNR}[\text{Na}_-, F_-, \Phi_-, s_-, h_-, R_-, p0_-] := \left( \left( \frac{(F + h - F h)}{(1 - h + F h)} \left( \frac{1}{p0} + 1 \right) - 1 \right)^{-\frac{R (1 - F)}{2 \text{Na} (F + h - F h) s}} \right);$$

$$\begin{aligned} \text{PrKR}[k_-, n_-, R_-, F_-, \Phi_-, p0_-] := & \left( \left( 2 \frac{R}{1 + F} (1 - 2 F + \Phi) p0 (1 - p0) \right)^k \text{Abs}[\text{StirlingS1}[n, k]] \right) / \\ & \text{Product} \left[ \left( 2 \frac{R}{1 + F} (1 - 2 F + \Phi) p0 (1 - p0) + a \right), \{a, 0, n - 1\} \right]; \end{aligned}$$

$$\text{PrJ}[j_-, k_-] := \frac{1}{j \text{Sum} \left[ \frac{1}{a}, \{a, k - 1\} \right]};$$

$$\begin{aligned} \text{H}[g_-, j_-, k_-, n_-, i_-] := & (\text{Binomial}[n - i, g] * \text{Binomial}[k, j - g]) / \text{Binomial}[k + n - i, j]; \\ \text{PrL}[n_-, k_-, j_-, l_-] := & ((\text{Binomial}[n, l] * \text{Abs}[\text{StirlingS1}[l, j]] * \text{Abs}[\text{StirlingS1}[n - l, k - j]]) / \\ & (\text{Binomial}[k, j] * \text{Abs}[\text{StirlingS1}[n, k]])); \end{aligned}$$

$$\begin{aligned} \text{TFixI}[\text{Na}_-, s_-, h_-, F_-, p0_-] := & \frac{\text{EulerGamma} + \text{Log} \left[ \frac{4 \text{Na} s (1 - (1 - F) h) (1 - p0)}{1 + F} \right]}{s (1 - (1 - F) h)} - \frac{\text{Log}[p0]}{s (h + F - h F)} + \\ & \frac{(1 - F) (1 - 2 h)}{s (h + F - h F) (1 - (1 - F) h)} \text{Log} \left[ \frac{h + F - h F + (1 - F) (1 - 2 h) p0}{1 - (1 - F) h} \right] \end{aligned}$$

$$\text{TFixIC}[\text{Na}_-, s_-, h_-, F_-, p0_-] := \frac{(1 + F) \text{TFixI}[\text{Na}, s, h, F, p0]}{2 \text{Na}}$$

$$\text{Boostp0}[\text{Na}_-, s_-, h_-, \sigma_-] := \frac{1 + F[\sigma]}{4 \text{Na} s (F[\sigma] + h - F[\sigma] h)}$$

```

PLNH[Na_, s_, h_, σ_, R_, n_, l_, p0_, θ_] :=
Sum[PDF[BinomialDistribution[n, PNR[Na, F[σ],  $\Phi\left[\frac{R}{2Na}, \sigma\right]$ , s, h, R, p0]], i] *
(
Piecewise[{{Sum[PrKR[k, i, R, F[σ],  $\Phi\left[\frac{R}{2Na}, \sigma\right]$ , p0] *
Sum[PrJ[j, k + n - i] * Sum[H[g, j, k, n, i] * PrL[i, k, j - g, l - g],
{g, Max[{j - k, l - i}], Min[{j, l, n - i}]}], {j, 1,
Min[{k + n - i - 1, l}]}], {k, 1, i}], 0 < i < n}, {0, i == 0 || i == n}]}] +
Piecewise[{{ $\frac{1}{l \text{ Sum}\left[\frac{1}{a}, \{a, n - 1\}\right]}$ , i == 0}, {0, i ≠ 0}}] +
Piecewise[{{PrKR[1, i, R, F[σ],  $\Phi\left[\frac{R}{2Na}, \sigma\right]$ , p0] * Piecewise[
{{ $\theta * p0 + \frac{\theta n}{2} \text{TFixIC}[Na, s, h, F[σ], p0]$ , l == 1}, { $\frac{\theta * p0}{l}$ , l ≠ 1}}] +
Sum[PrKR[k, i, R, F[σ],  $\Phi\left[\frac{R}{2Na}, \sigma\right]$ , p0] * Sum[PrJ[j, k] * PrL[n, k, j, l],
{j, 1, Min[{k - 1, l}]}], {k, 2, n}], i == n}, {0, i ≠ n}]}]
], {i, 0, n}]

PLNHS[Na_, s_, h_, σ_, R_, n_, p0_, θ_] :=
Sum[PLNH[Na, s, h, σ, R, n, L, p0, θ], {L, 1, n - 1}]

PLNH2[Na_, s_, h_, σ_, R_, n_, l_, p0_, θ_] :=  $\frac{\text{PLNH}[Na, s, h, \sigma, R, n, l, p0, \theta]}{\text{PLNHS}[Na, s, h, \sigma, R, n, p0, \theta]}$ 

```

## Outcrossing results ( $\sigma = F = 0$ )

### Results with $p_0 = 1/2N$

R = 6

SLiM simulation results

```

datfDNR6h01 = Import[
  "SLIM_SFS_F0/SFSTab_R_6_h_0.1_self_0_f_1e-04_10b_SLIM.dat", "Table"][[1]];
datfDNR6h01CI = Import[
  "SLIM_SFS_F0/SFSTab_R_6_h_0.1_self_0_f_1e-04_10b_SLIM.dat", "Table"][[2]];
datfDNR6h05 = Import["SLIM_SFS_F0/SFSTab_R_6_h_0.5_self_0_f_1e-04_10b_SLIM.dat",
  "Table"][[1]];
datfDNR6h05CI = Import[
  "SLIM_SFS_F0/SFSTab_R_6_h_0.5_self_0_f_1e-04_10b_SLIM.dat", "Table"][[2]];
datfDNR6h09 = Import["SLIM_SFS_F0/SFSTab_R_6_h_0.9_self_0_f_1e-04_10b_SLIM.dat",
  "Table"][[1]];
datfDNR6h09CI = Import[
  "SLIM_SFS_F0/SFSTab_R_6_h_0.9_self_0_f_1e-04_10b_SLIM.dat", "Table"][[2]];
datfDNR6h01T = Partition[Riffle[Partition[Riffle[Range[9], datfDNR6h01], 2],
  Map[ErrorBar, datfDNR6h01CI]], 2];
datfDNR6h05T = Partition[Riffle[Partition[Riffle[Range[9], datfDNR6h05], 2],
  Map[ErrorBar, datfDNR6h05CI]], 2];
datfDNR6h09T = Partition[Riffle[Partition[Riffle[Range[9], datfDNR6h09], 2],
  Map[ErrorBar, datfDNR6h09CI]], 2];

```

MSMS simulation results

```

datfDNR6h01MSMS =
  Import["SFS_MSMS_SV_5K/SFSTab_R_12_h_0.1_self_0_f_1e-04_10b_MSMS.dat",
    "Table"][[1]];
datfDNR6h01MSMSCI = Import[
  "SFS_MSMS_SV_5K/SFSTab_R_12_h_0.1_self_0_f_1e-04_10b_MSMS.dat",
  "Table"][[2]];
datfDNR6h05MSMS = Import[
  "SFS_MSMS_SV_5K/SFSTab_R_12_h_0.5_self_0_f_1e-04_10b_MSMS.dat",
  "Table"][[1]];
datfDNR6h05MSMSCI = Import[
  "SFS_MSMS_SV_5K/SFSTab_R_12_h_0.5_self_0_f_1e-04_10b_MSMS.dat",
  "Table"][[2]];
datfDNR6h09MSMS = Import[
  "SFS_MSMS_SV_5K/SFSTab_R_12_h_0.9_self_0_f_1e-04_10b_MSMS.dat",
  "Table"][[1]];
datfDNR6h09MSMSCI = Import[
  "SFS_MSMS_SV_5K/SFSTab_R_12_h_0.9_self_0_f_1e-04_10b_MSMS.dat",
  "Table"][[2]];
datfDNR6h01MSMST = Partition[Riffle[Partition[Riffle[Range[9], datfDNR6h01MSMS],
  2], Map[ErrorBar, datfDNR6h01MSMSCI]], 2];
datfDNR6h05MSMST = Partition[Riffle[Partition[Riffle[Range[9], datfDNR6h05MSMS],
  2], Map[ErrorBar, datfDNR6h05MSMSCI]], 2];
datfDNR6h09MSMST = Partition[Riffle[Partition[Riffle[Range[9], datfDNR6h09MSMS],
  2], Map[ErrorBar, datfDNR6h09MSMSCI]], 2];

```

Analytical solutions

```
p1R6 = ListPlot[
  {Table[{l, PLNH2[5000, 0.05, 0.1, 0, 6, 10, l, Boostp0[5000, 0.05, 0.1, 0], 4]},
    {l, 1, 9}], Table[{l, PLNH2[5000, 0.05, 0.5, 0, 6,
      10, l, Boostp0[5000, 0.05, 0.5, 0], 4]}, {l, 1, 9}],
  Table[{l, PLNH2[5000, 0.05, 0.9, 0, 6, 10, l, Boostp0[5000, 0.05, 0.9, 0], 4]},
    {l, 1, 9}], Table[{l, PrJ[l, 10]}, {l, 1, 9}]], PlotRange → All,
  PlotStyle → {Red, Black, Blue, {Gray, Dashed}}, Joined → True,
  Ticks → {{1, 2, 3, 4, 5, 6, 7, 8, 9}, Automatic},
  BaseStyle → {FontWeight → "Bold", FontColor → Black, FontSize → 12}]
```

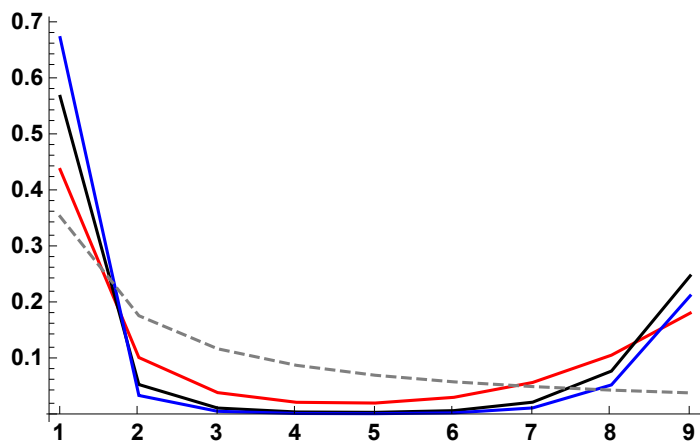

SLiM simulations plot

```
p2R6 = ErrorListPlot[
  {datfDNR6h01T, datfDNR6h05T, datfDNR6h09T}, PlotRange → All, PlotStyle →
    {{Red, PointSize[0.02]}, {Black, PointSize[0.02]}, {Blue, PointSize[0.02]}}
```

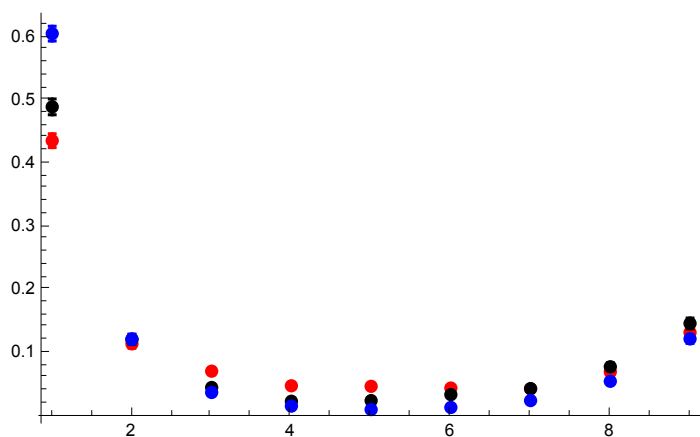

MSMS simulations plot

```
p2AR6 = ErrorListPlot[{datfDNR6h01MSMST, datfDNR6h05MSMST, datfDNR6h09MSMST},
  PlotRange → All, PlotStyle →
    {{Pink, PointSize[0.02]}, {Gray, PointSize[0.02]}, {Cyan, PointSize[0.02]}}
```

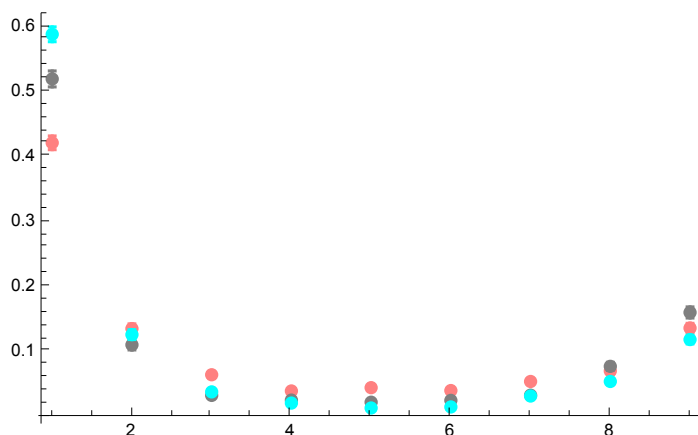

All together

```
p3R6s0DN = Show[p1R6, p2R6, p2AR6, PlotRange → All, ImageSize → 325]
```

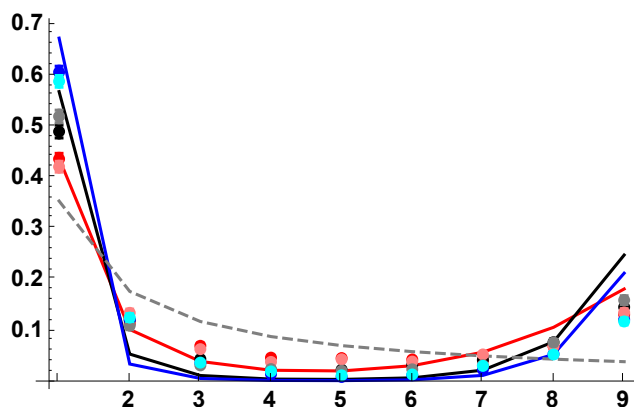

Analytical results and SLiM simulations

```
p3AR6s0DN = Show[p1R6, p2R6, PlotRange → All, ImageSize → 325]
```

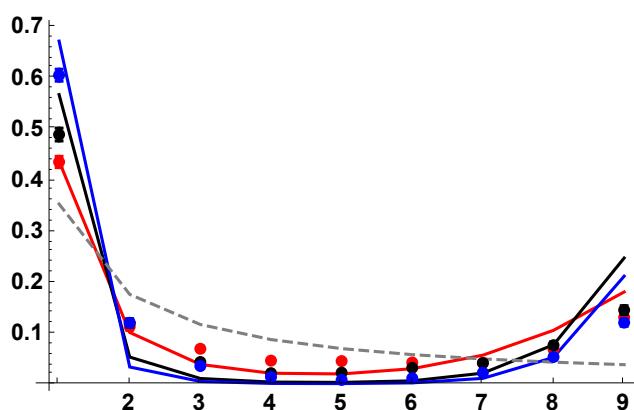

Simulation results only (SLiM and MSMS)

```
p3BR6s0DN = Show[p2R6, p2AR6, PlotRange -> All]
```

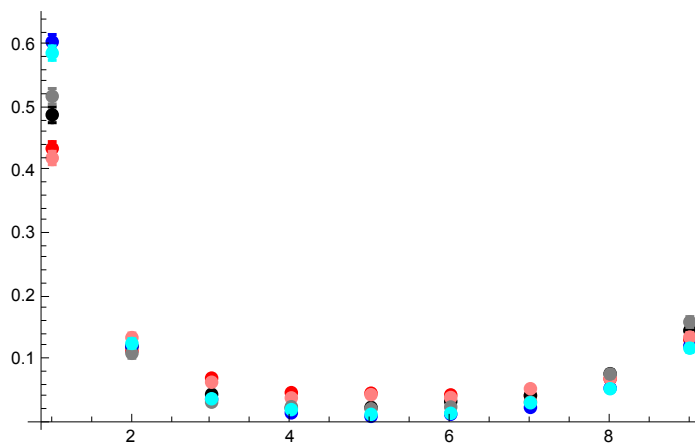

R = 18

SLiM simulation results

```
datfDNR18h01 =
  Import["SLiM_SFS_F0/SFSTab_R_18_h_0.1_self_0_f_1e-04_10b_SLiM.dat",
    "Table"][[1]];
datfDNR18h01CI = Import[
  "SLiM_SFS_F0/SFSTab_R_18_h_0.1_self_0_f_1e-04_10b_SLiM.dat",
  "Table"][[2]];
datfDNR18h05 = Import[
  "SLiM_SFS_F0/SFSTab_R_18_h_0.5_self_0_f_1e-04_10b_SLiM.dat",
  "Table"][[1]];
datfDNR18h05CI = Import[
  "SLiM_SFS_F0/SFSTab_R_18_h_0.5_self_0_f_1e-04_10b_SLiM.dat",
  "Table"][[2]];
datfDNR18h09 = Import[
  "SLiM_SFS_F0/SFSTab_R_18_h_0.9_self_0_f_1e-04_10b_SLiM.dat",
  "Table"][[1]];
datfDNR18h09CI = Import[
  "SLiM_SFS_F0/SFSTab_R_18_h_0.9_self_0_f_1e-04_10b_SLiM.dat",
  "Table"][[2]];
datfDNR18h01T = Partition[Riffle[Partition[Riffle[Range[9], datfDNR18h01], 2],
  Map[ErrorBar, datfDNR18h01CI]], 2];
datfDNR18h05T = Partition[Riffle[Partition[Riffle[Range[9], datfDNR18h05], 2],
  Map[ErrorBar, datfDNR18h05CI]], 2];
datfDNR18h09T = Partition[Riffle[Partition[Riffle[Range[9], datfDNR18h09], 2],
  Map[ErrorBar, datfDNR18h09CI]], 2];
```

MSMS simulation results

```

datfDNR18h01MSMS =
  Import["SFS_MSMS_SV_5K/SFSTab_R_36_h_0.1_self_0_f_1e-04_10b_MSMS.dat",
    "Table"][[1]];
datfDNR18h01MSMSCI = Import[
  "SFS_MSMS_SV_5K/SFSTab_R_36_h_0.1_self_0_f_1e-04_10b_MSMS.dat",
  "Table"][[2]];
datfDNR18h05MSMS = Import[
  "SFS_MSMS_SV_5K/SFSTab_R_36_h_0.5_self_0_f_1e-04_10b_MSMS.dat",
  "Table"][[1]];
datfDNR18h05MSMSCI = Import[
  "SFS_MSMS_SV_5K/SFSTab_R_36_h_0.5_self_0_f_1e-04_10b_MSMS.dat",
  "Table"][[2]];
datfDNR18h09MSMS = Import[
  "SFS_MSMS_SV_5K/SFSTab_R_36_h_0.9_self_0_f_1e-04_10b_MSMS.dat",
  "Table"][[1]];
datfDNR18h09MSMSCI = Import[
  "SFS_MSMS_SV_5K/SFSTab_R_36_h_0.9_self_0_f_1e-04_10b_MSMS.dat",
  "Table"][[2]];
datfDNR18h01MSMST = Partition[Riffle[Partition[Riffle[Range[9],
  datfDNR18h01MSMS], 2], Map[ErrorBar, datfDNR18h01MSMSCI]], 2];
datfDNR18h05MSMST = Partition[Riffle[Partition[Riffle[Range[9],
  datfDNR18h05MSMS], 2], Map[ErrorBar, datfDNR18h05MSMSCI]], 2];
datfDNR18h09MSMST = Partition[Riffle[Partition[Riffle[Range[9],
  datfDNR18h09MSMS], 2], Map[ErrorBar, datfDNR18h09MSMSCI]], 2];

```

Analytical solutions

```

p1R18 = ListPlot[
  {Table[{l, PLNH2[5000, 0.05, 0.1, 0, 18, 10, l, Boostp0[5000, 0.05, 0.1, 0], 4]},
    {l, 1, 9}], Table[{l, PLNH2[5000, 0.05, 0.5, 0, 18,
      10, l, Boostp0[5000, 0.05, 0.5, 0], 4]}, {l, 1, 9}],
  Table[{l, PLNH2[5000, 0.05, 0.9, 0, 18, 10, l, Boostp0[5000, 0.05, 0.9, 0], 4]},
    {l, 1, 9}], Table[{l, PrJ[l, 10]}, {l, 1, 9}]], PlotRange → All,
  PlotStyle → {Red, Black, Blue, {Gray, Dashed}}, Joined → True,
  Ticks → {{1, 2, 3, 4, 5, 6, 7, 8, 9}, Automatic},
  BaseStyle → {FontWeight → "Bold", FontColor → Black, FontSize → 12}]

```

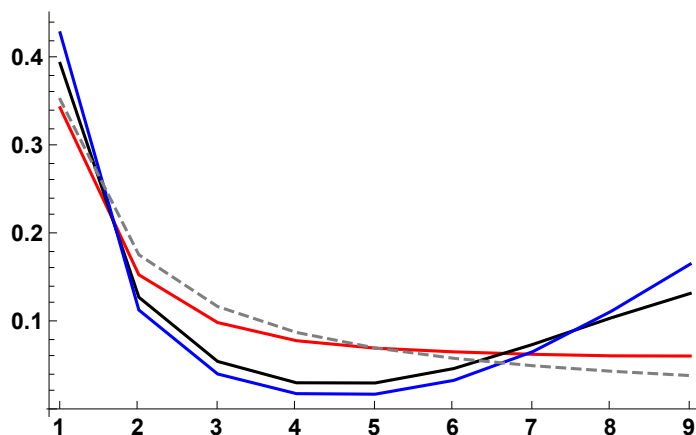

SLiM simulations plot

```
p2R18 = ErrorListPlot[
  {datfDNR18h01T, datfDNR18h05T, datfDNR18h09T}, PlotRange → All, PlotStyle →
  {{Red, PointSize[0.02]}, {Black, PointSize[0.02]}, {Blue, PointSize[0.02]}}
```

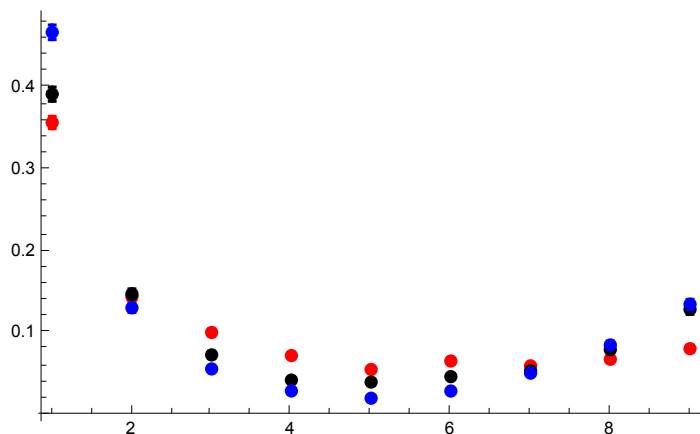

MSMS simulation results

```
p2AR18 = ErrorListPlot[{datfDNR18h01MSMST, datfDNR18h05MSMST, datfDNR18h09MSMST},
  PlotRange → All, PlotStyle →
  {{Pink, PointSize[0.02]}, {Gray, PointSize[0.02]}, {Cyan, PointSize[0.02]}}
```

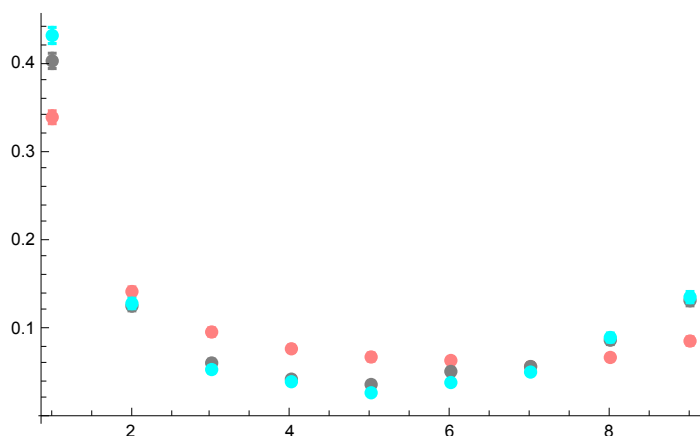

All together

```
p3R18s0DN = Show[p1R18, p2R18, p2AR18, PlotRange → All, ImageSize → 325]
```

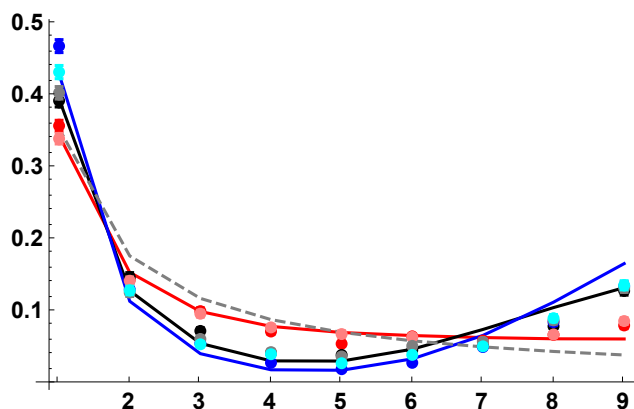



Analytical results and SLiM simulations

`p3AR18 = Show[p1R18, p2R18, PlotRange -> All]`

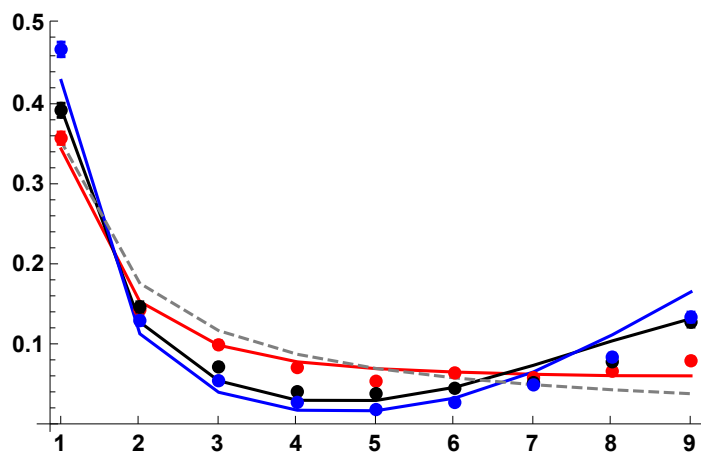

Simulation results only (SLiM and MSMS)

`p3BR18 = Show[p2R18, p2AR18, PlotRange -> All]`

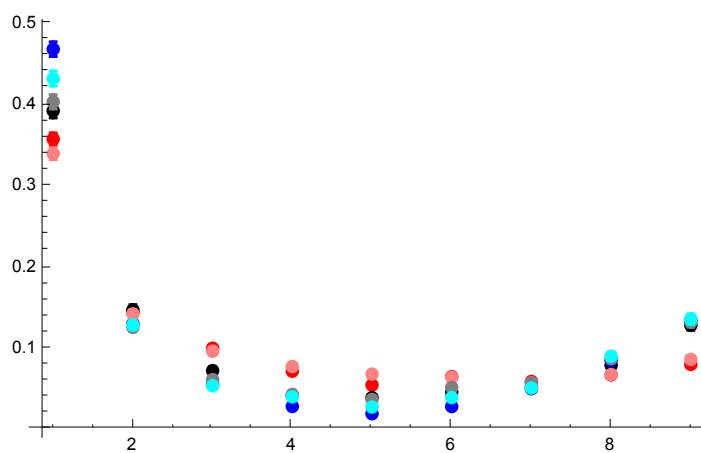

$R = 30$

SLiM simulations plot

```

datfDNR30h01 =
  Import["SLIM_SFS_F0/SFSTab_R_30_h_0.1_self_0_f_1e-04_10b_SLIM.dat",
    "Table"][[1]];
datfDNR30h01CI = Import[
  "SLIM_SFS_F0/SFSTab_R_30_h_0.1_self_0_f_1e-04_10b_SLIM.dat",
  "Table"][[2]];
datfDNR30h05 = Import[
  "SLIM_SFS_F0/SFSTab_R_30_h_0.5_self_0_f_1e-04_10b_SLIM.dat",
  "Table"][[1]];
datfDNR30h05CI = Import[
  "SLIM_SFS_F0/SFSTab_R_30_h_0.5_self_0_f_1e-04_10b_SLIM.dat",
  "Table"][[2]];
datfDNR30h09 = Import[
  "SLIM_SFS_F0/SFSTab_R_30_h_0.9_self_0_f_1e-04_10b_SLIM.dat",
  "Table"][[1]];
datfDNR30h09CI = Import[
  "SLIM_SFS_F0/SFSTab_R_30_h_0.9_self_0_f_1e-04_10b_SLIM.dat",
  "Table"][[2]];
datfDNR30h01T = Partition[Riffle[Partition[Riffle[Range[9], datfDNR30h01], 2],
  Map[ErrorBar, datfDNR30h01CI]], 2];
datfDNR30h05T = Partition[Riffle[Partition[Riffle[Range[9], datfDNR30h05], 2],
  Map[ErrorBar, datfDNR30h05CI]], 2];
datfDNR30h09T = Partition[Riffle[Partition[Riffle[Range[9], datfDNR30h09], 2],
  Map[ErrorBar, datfDNR30h09CI]], 2];

```

MSMS simulation results

```

datfDNR30h01MSMS =
  Import["SFS_MSMS_SV_5K/SFSTab_R_60_h_0.1_self_0_f_1e-04_10b_MSMS.dat",
    "Table"][[1]];
datfDNR30h01MSMSCI = Import[
  "SFS_MSMS_SV_5K/SFSTab_R_60_h_0.1_self_0_f_1e-04_10b_MSMS.dat",
  "Table"][[2]];
datfDNR30h05MSMS = Import[
  "SFS_MSMS_SV_5K/SFSTab_R_60_h_0.5_self_0_f_1e-04_10b_MSMS.dat",
  "Table"][[1]];
datfDNR30h05MSMSCI = Import[
  "SFS_MSMS_SV_5K/SFSTab_R_60_h_0.5_self_0_f_1e-04_10b_MSMS.dat",
  "Table"][[2]];
datfDNR30h09MSMS = Import[
  "SFS_MSMS_SV_5K/SFSTab_R_60_h_0.9_self_0_f_1e-04_10b_MSMS.dat",
  "Table"][[1]];
datfDNR30h09MSMSCI = Import[
  "SFS_MSMS_SV_5K/SFSTab_R_60_h_0.9_self_0_f_1e-04_10b_MSMS.dat",
  "Table"][[2]];
datfDNR30h01MSMST = Partition[Riffle[Partition[Riffle[Range[9],
  datfDNR30h01MSMS], 2], Map[ErrorBar, datfDNR30h01MSMSCI]], 2];
datfDNR30h05MSMST = Partition[Riffle[Partition[Riffle[Range[9],
  datfDNR30h05MSMS], 2], Map[ErrorBar, datfDNR30h05MSMSCI]], 2];
datfDNR30h09MSMST = Partition[Riffle[Partition[Riffle[Range[9],
  datfDNR30h09MSMS], 2], Map[ErrorBar, datfDNR30h09MSMSCI]], 2];

```

Analytical solutions

```

p1R30 = ListPlot[
  {Table[{l, PLNH2[5000, 0.05, 0.1, 0, 30, 10, l, Boostp0[5000, 0.05, 0.1, 0], 4]},
    {l, 1, 9}], Table[{l, PLNH2[5000, 0.05, 0.5, 0, 30,
    10, l, Boostp0[5000, 0.05, 0.5, 0], 4]}, {l, 1, 9}],
  Table[{l, PLNH2[5000, 0.05, 0.9, 0, 30, 10, l, Boostp0[5000, 0.05, 0.9, 0], 4]},
    {l, 1, 9}], Table[{l, PrJ[l, 10]}, {l, 1, 9}]], PlotRange → All,
  PlotStyle → {Red, Black, Blue, {Gray, Dashed}}, Joined → True]

```

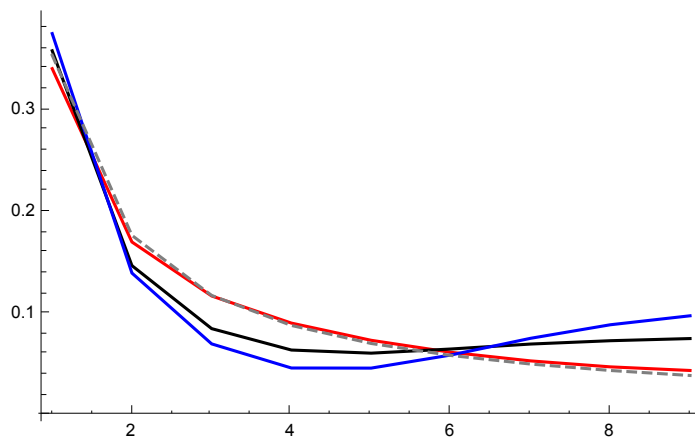

SLiM simulations plot

```
p2R30 = ErrorListPlot[
  {datfDNR30h01T, datfDNR30h05T, datfDNR30h09T}, PlotRange → All, PlotStyle →
  {{Red, PointSize[0.02]}, {Black, PointSize[0.02]}, {Blue, PointSize[0.02]}}
```

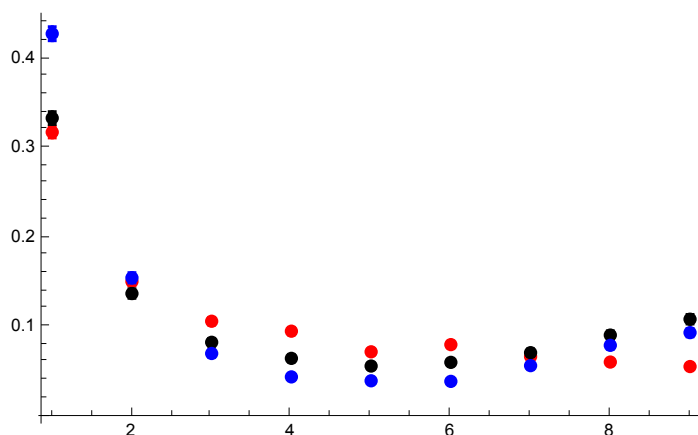

MSMS simulation results

```
p2AR30 = ErrorListPlot[{datfDNR30h01MSMST, datfDNR30h05MSMST, datfDNR30h09MSMST},
  PlotRange → All, PlotStyle →
  {{Pink, PointSize[0.02]}, {Gray, PointSize[0.02]}, {Cyan, PointSize[0.02]}}
```

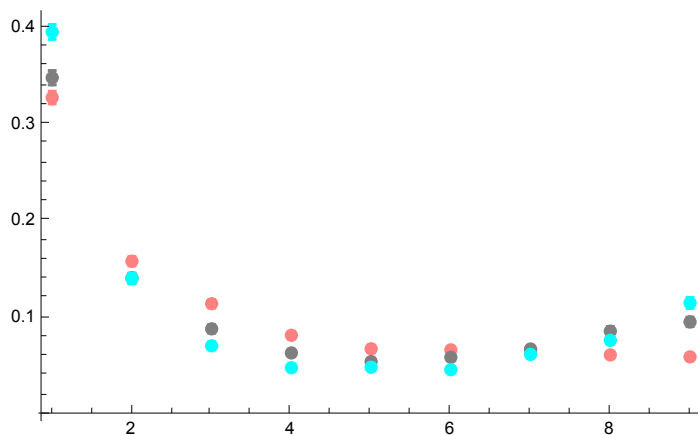

All together

```
p3R30 = Show[p1R30, p2R30, p2AR30, PlotRange → All]
```

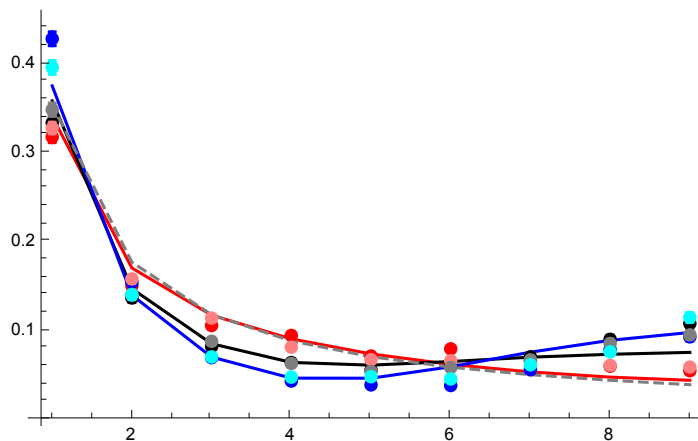

Analytical results and SLiM simulations

```
p3AR30 = Show[p1R30, p2R30, PlotRange -> All]
```

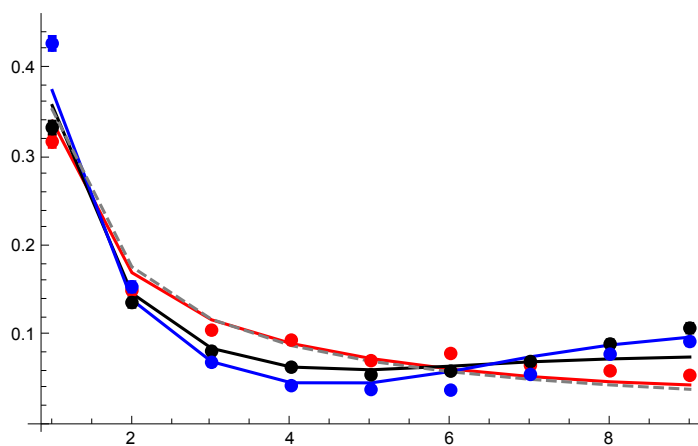

Simulation results only (SLiM and MSMS)

```
p3BR30 = Show[p2R30, p2AR30, PlotRange -> All]
```

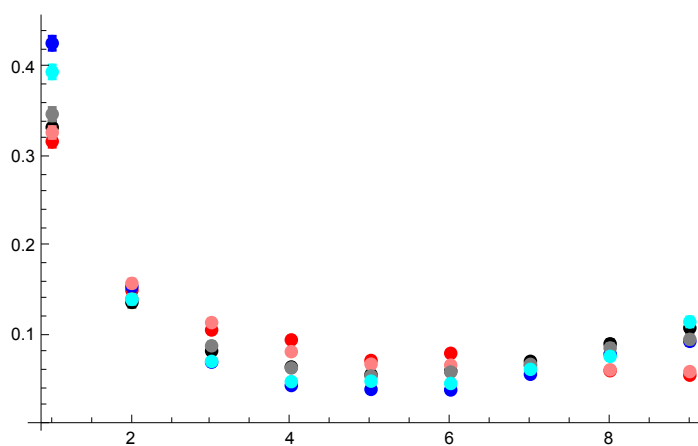

R = 42

SLiM simulations results

```

datfDNR42h01 =
  Import["SLIM_SFS_F0/SFSTab_R_42_h_0.1_self_0_f_1e-04_10b_SLIM.dat",
    "Table"][[1]];
datfDNR42h01CI = Import[
  "SLIM_SFS_F0/SFSTab_R_42_h_0.1_self_0_f_1e-04_10b_SLIM.dat",
  "Table"][[2]];
datfDNR42h05 = Import[
  "SLIM_SFS_F0/SFSTab_R_42_h_0.5_self_0_f_1e-04_10b_SLIM.dat",
  "Table"][[1]];
datfDNR42h05CI = Import[
  "SLIM_SFS_F0/SFSTab_R_42_h_0.5_self_0_f_1e-04_10b_SLIM.dat",
  "Table"][[2]];
datfDNR42h09 = Import[
  "SLIM_SFS_F0/SFSTab_R_42_h_0.9_self_0_f_1e-04_10b_SLIM.dat",
  "Table"][[1]];
datfDNR42h09CI = Import[
  "SLIM_SFS_F0/SFSTab_R_42_h_0.9_self_0_f_1e-04_10b_SLIM.dat",
  "Table"][[2]];
datfDNR42h01T = Partition[Riffle[Partition[Riffle[Range[9], datfDNR42h01], 2],
  Map[ErrorBar, datfDNR42h01CI]], 2];
datfDNR42h05T = Partition[Riffle[Partition[Riffle[Range[9], datfDNR42h05], 2],
  Map[ErrorBar, datfDNR42h05CI]], 2];
datfDNR42h09T = Partition[Riffle[Partition[Riffle[Range[9], datfDNR42h09], 2],
  Map[ErrorBar, datfDNR42h09CI]], 2];

```

MSMS simulation results

```

datfDNR42h01MSMS =
  Import["SFS_MSMS_SV_5K/SFSTab_R_84_h_0.1_self_0_f_1e-04_10b_MSMS.dat",
    "Table"][[1]];
datfDNR42h01MSMSCI = Import[
  "SFS_MSMS_SV_5K/SFSTab_R_84_h_0.1_self_0_f_1e-04_10b_MSMS.dat",
  "Table"][[2]];
datfDNR42h05MSMS = Import[
  "SFS_MSMS_SV_5K/SFSTab_R_84_h_0.5_self_0_f_1e-04_10b_MSMS.dat",
  "Table"][[1]];
datfDNR42h05MSMSCI = Import[
  "SFS_MSMS_SV_5K/SFSTab_R_84_h_0.5_self_0_f_1e-04_10b_MSMS.dat",
  "Table"][[2]];
datfDNR42h09MSMS = Import[
  "SFS_MSMS_SV_5K/SFSTab_R_84_h_0.9_self_0_f_1e-04_10b_MSMS.dat",
  "Table"][[1]];
datfDNR42h09MSMSCI = Import[
  "SFS_MSMS_SV_5K/SFSTab_R_84_h_0.9_self_0_f_1e-04_10b_MSMS.dat",
  "Table"][[2]];
datfDNR42h01MSMST = Partition[Riffle[Partition[Riffle[Range[9],
  datfDNR42h01MSMS], 2], Map[ErrorBar, datfDNR42h01MSMSCI]], 2];
datfDNR42h05MSMST = Partition[Riffle[Partition[Riffle[Range[9],
  datfDNR42h05MSMS], 2], Map[ErrorBar, datfDNR42h05MSMSCI]], 2];
datfDNR42h09MSMST = Partition[Riffle[Partition[Riffle[Range[9],
  datfDNR42h09MSMS], 2], Map[ErrorBar, datfDNR42h09MSMSCI]], 2];

```

Analytic solutions

```

p1R42 = ListPlot[
  {Table[{l, PLNH2[5000, 0.05, 0.1, 0, 42, 10, l, Boostp0[5000, 0.05, 0.1, 0], 4]},
    {l, 1, 9}], Table[{l, PLNH2[5000, 0.05, 0.5, 0, 42,
    10, l, Boostp0[5000, 0.05, 0.5, 0], 4]}, {l, 1, 9}],
  Table[{l, PLNH2[5000, 0.05, 0.9, 0, 42, 10, l, Boostp0[5000, 0.05, 0.9, 0], 4]},
    {l, 1, 9}], Table[{l, PrJ[l, 10]}, {l, 1, 9}]], PlotRange → All,
  PlotStyle → {Red, Black, Blue, {Gray, Dashed}}, Joined → True]

```

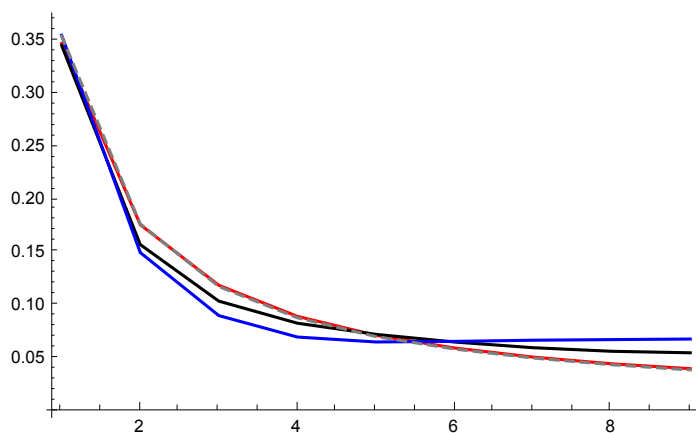

SLiM simulations plot

```
p2R42 = ErrorListPlot[
  {datfDNR42h01T, datfDNR42h05T, datfDNR42h09T}, PlotRange → All, PlotStyle →
  {{Red, PointSize[0.02]}, {Black, PointSize[0.02]}, {Blue, PointSize[0.02]}}
```

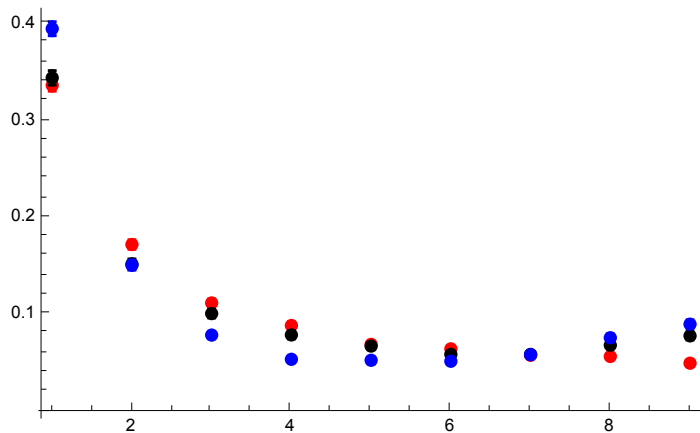

MSMS simulation results

```
p2AR42 = ErrorListPlot[{datfDNR42h01MSMST, datfDNR42h05MSMST, datfDNR42h09MSMST},
  PlotRange → All, PlotStyle →
  {{Pink, PointSize[0.02]}, {Gray, PointSize[0.02]}, {Cyan, PointSize[0.02]}}
```

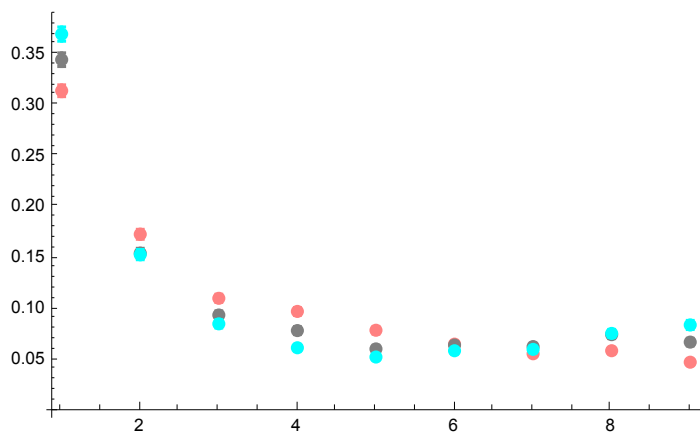

All together

```
p3R42 = Show[p1R42, p2R42, p2AR42, PlotRange → All]
```

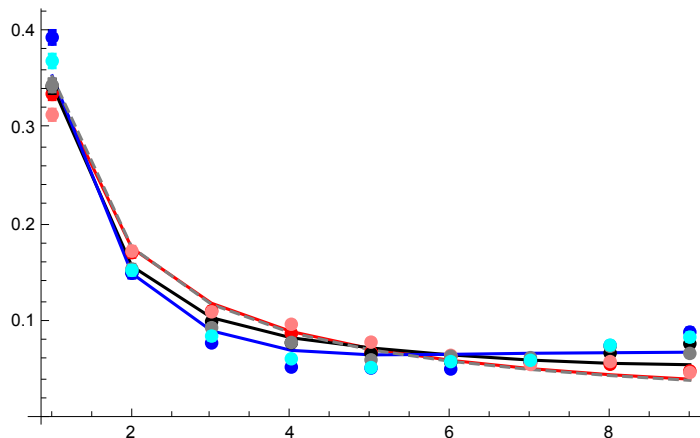

Analytical solutions and SLIM results



p3AR42 = Show[p1R42, p2R42, PlotRange → All]

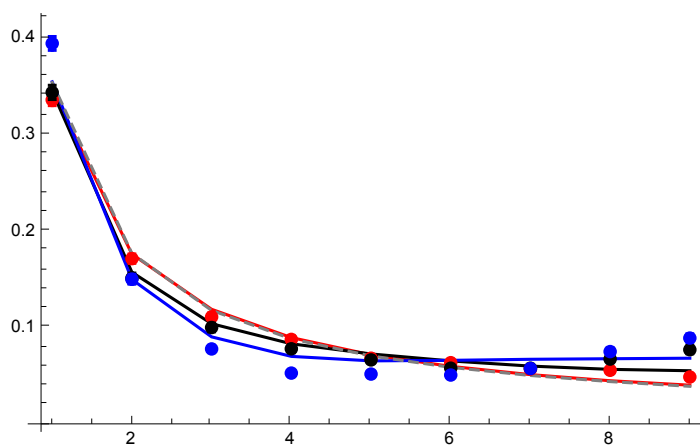

Simulation results only (SLiM and MSMS)

p3BR42 = Show[p2R42, p2AR42, PlotRange → All]

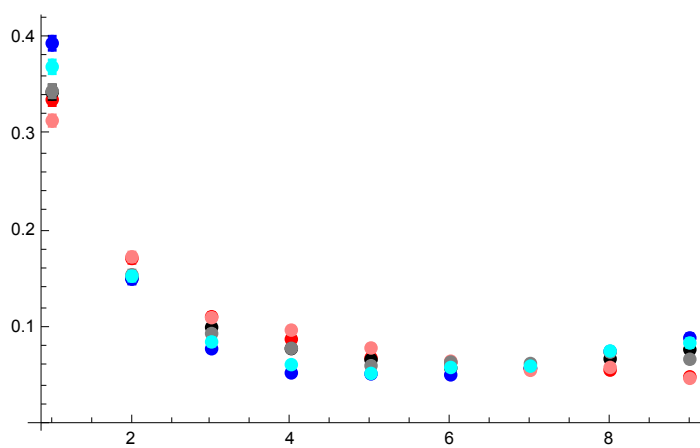

All plots compared

GraphicsGrid[{{p3AR6s0DN, p3AR18}, {p3AR30, p3AR42}}]

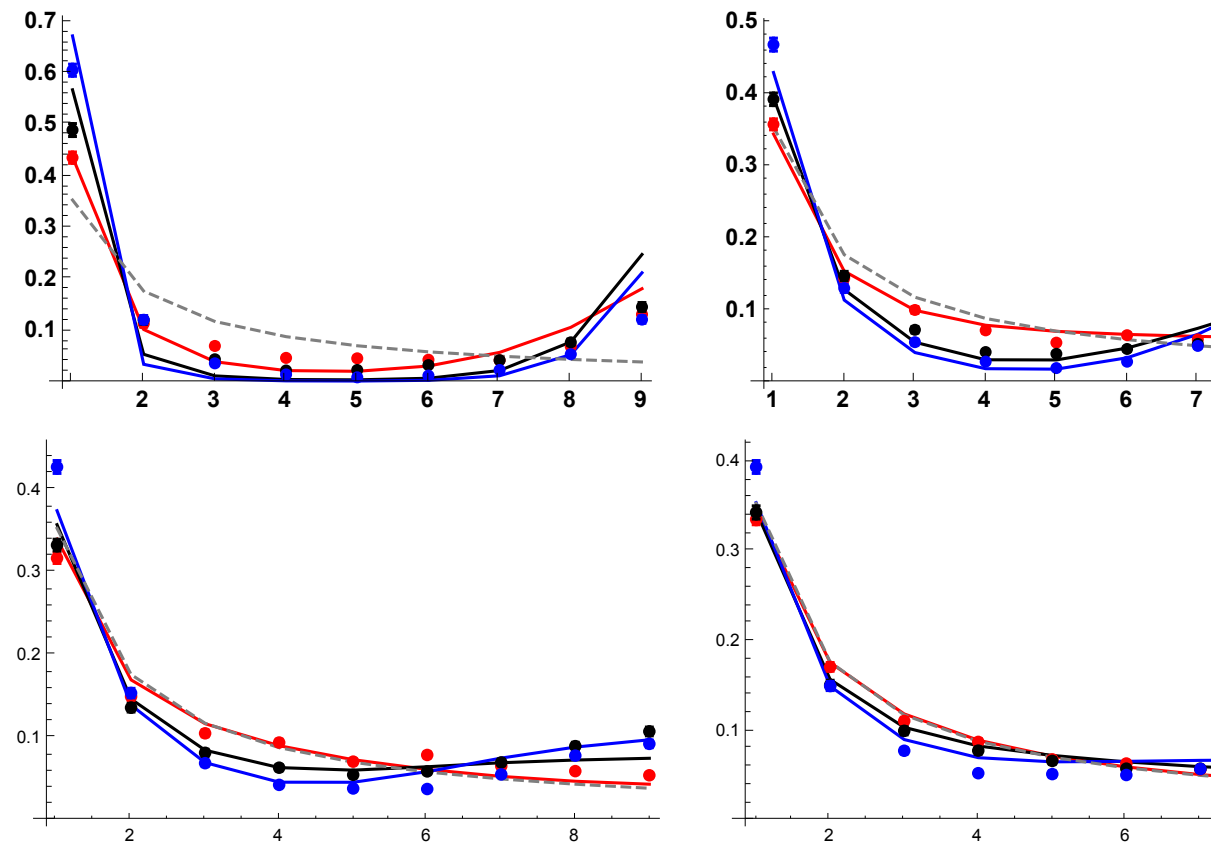

## Results with $p_0 = 0.02$

R = 6

SLiM simulations results

```
datp002R6h01 = Import[
  "SLiM_SFS_F0/SFSTab_R_6_h_0.1_self_0_f_0.02_10b_SLiM.dat", "Table"][[1]];
datp002R6h01CI = Import[
  "SLiM_SFS_F0/SFSTab_R_6_h_0.1_self_0_f_0.02_10b_SLiM.dat", "Table"][[2]];
datp002R6h05 = Import["SLiM_SFS_F0/SFSTab_R_6_h_0.5_self_0_f_0.02_10b_SLiM.dat",
  "Table"][[1]];
datp002R6h05CI = Import[
  "SLiM_SFS_F0/SFSTab_R_6_h_0.5_self_0_f_0.02_10b_SLiM.dat", "Table"][[2]];
datp002R6h09 = Import["SLiM_SFS_F0/SFSTab_R_6_h_0.9_self_0_f_0.02_10b_SLiM.dat",
  "Table"][[1]];
datp002R6h09CI = Import[
  "SLiM_SFS_F0/SFSTab_R_6_h_0.9_self_0_f_0.02_10b_SLiM.dat", "Table"][[2]];
datp002R6h01T = Partition[Riffle[Partition[Riffle[Range[9], datp002R6h01], 2],
  Map[ErrorBar, datp002R6h01CI], 2];
datp002R6h05T = Partition[Riffle[Partition[Riffle[Range[9], datp002R6h05], 2],
  Map[ErrorBar, datp002R6h05CI], 2];
datp002R6h09T = Partition[Riffle[Partition[Riffle[Range[9], datp002R6h09], 2],
  Map[ErrorBar, datp002R6h09CI], 2];
```

MSMS simulation results

```
datp002R6h01MSMS =
  Import["SFS_MSMS_SV_5K/SFSTab_R_12_h_0.1_self_0_f_0.02_10b_MSMS.dat",
    "Table"][[1]];
datp002R6h01MSMSCI = Import[
  "SFS_MSMS_SV_5K/SFSTab_R_12_h_0.1_self_0_f_0.02_10b_MSMS.dat",
  "Table"][[2]];
datp002R6h05MSMS = Import[
  "SFS_MSMS_SV_5K/SFSTab_R_12_h_0.5_self_0_f_0.02_10b_MSMS.dat",
  "Table"][[1]];
datp002R6h05MSMSCI = Import[
  "SFS_MSMS_SV_5K/SFSTab_R_12_h_0.5_self_0_f_0.02_10b_MSMS.dat",
  "Table"][[2]];
datp002R6h09MSMS = Import[
  "SFS_MSMS_SV_5K/SFSTab_R_12_h_0.9_self_0_f_0.02_10b_MSMS.dat",
  "Table"][[1]];
datp002R6h09MSMSCI = Import[
  "SFS_MSMS_SV_5K/SFSTab_R_12_h_0.9_self_0_f_0.02_10b_MSMS.dat",
  "Table"][[2]];
datp002R6h01MSMST = Partition[Riffle[Partition[Riffle[Range[9],
  datp002R6h01MSMS], 2], Map[ErrorBar, datp002R6h01MSMSCI]], 2];
datp002R6h05MSMST = Partition[Riffle[Partition[Riffle[Range[9],
  datp002R6h05MSMS], 2], Map[ErrorBar, datp002R6h05MSMSCI]], 2];
datp002R6h09MSMST = Partition[Riffle[Partition[Riffle[Range[9],
  datp002R6h09MSMS], 2], Map[ErrorBar, datp002R6h09MSMSCI]], 2];
```

Analytical solutions

```
p1R6 = ListPlot[{Table[{l, PLNH2[5000, 0.05, 0.1, 0, 6, 10, l, 0.02, 4]}, {l, 1, 9}],
  Table[{l, PLNH2[5000, 0.05, 0.5, 0, 6, 10, l, 0.02, 4]}, {l, 1, 9}],
  Table[{l, PLNH2[5000, 0.05, 0.9, 0, 6, 10, l, 0.02, 4]}, {l, 1, 9}],
  Table[{l, PrJ[l, 10]}, {l, 1, 9}]], PlotRange → All,
  PlotStyle → {Red, Black, Blue, {Gray, Dashed}}, Joined → True,
  Ticks → {{1, 2, 3, 4, 5, 6, 7, 8, 9}, Automatic},
  BaseStyle → {FontWeight → "Bold", FontColor → Black, FontSize → 12}]
```

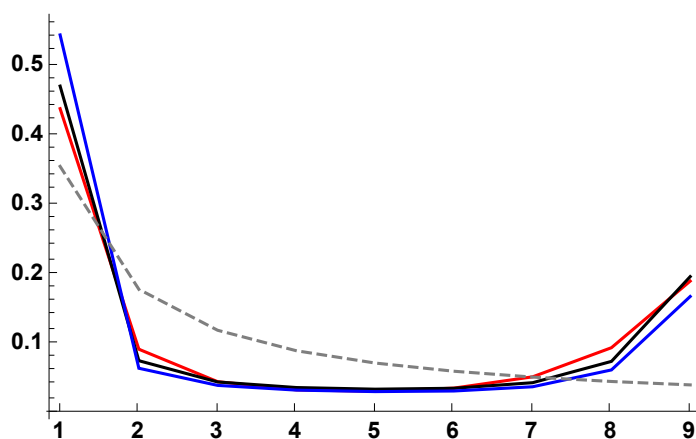

SLiM simulations plot

```
p2R6 = ErrorListPlot[
  {datp002R6h01T, datp002R6h05T, datp002R6h09T}, PlotRange → All, PlotStyle →
  {{Red, PointSize[0.02]}, {Black, PointSize[0.02]}, {Blue, PointSize[0.02]}}
```

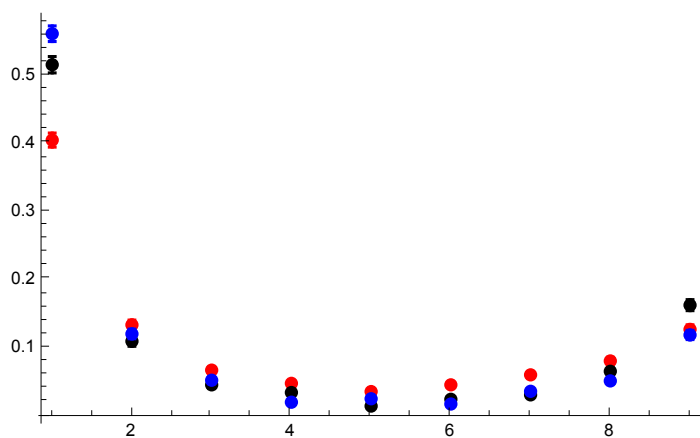

MSMS simulation results

```
p2AR6 = ErrorListPlot[{datp002R6h01MSMST, datp002R6h05MSMST, datp002R6h09MSMST},
  PlotRange → All, PlotStyle →
  {{Pink, PointSize[0.02]}, {Gray, PointSize[0.02]}, {Cyan, PointSize[0.02]}}
```

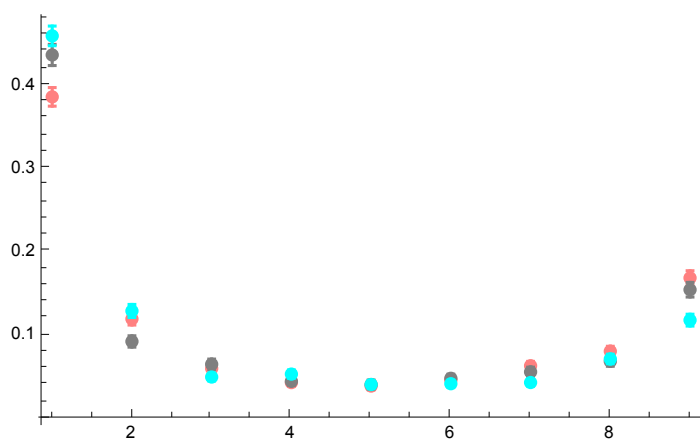

All together:

```
p3R6s0p02 = Show[p1R6, p2R6, p2AR6, PlotRange → All, ImageSize → 325]
```

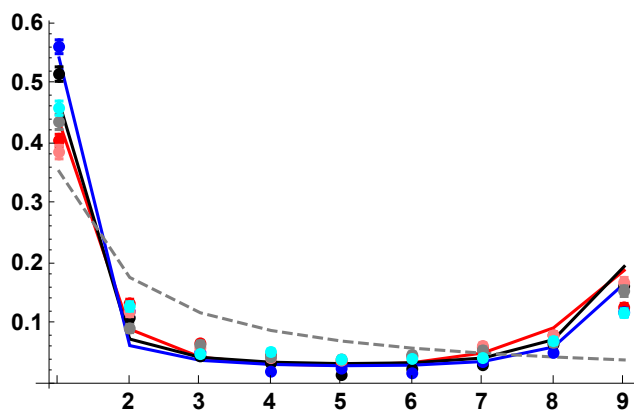

SLiM simulations and analytic results:

```
p3AR6s0p02 = Show[p1R6, p2R6, PlotRange -> All, ImageSize -> 325]
```

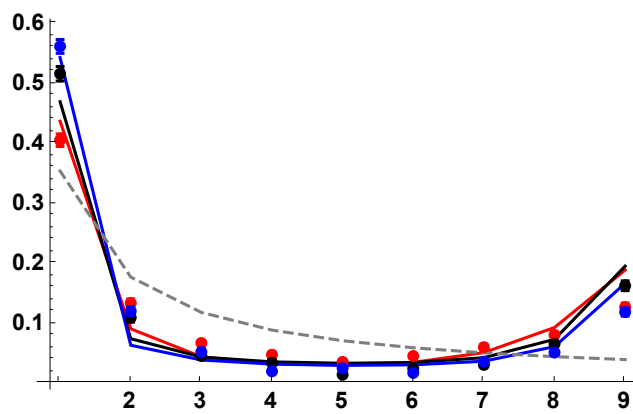

Simulation results only (SLiM and MSMS)

```
p3BR6 = Show[p2R6, p2AR6, PlotRange -> All]
```

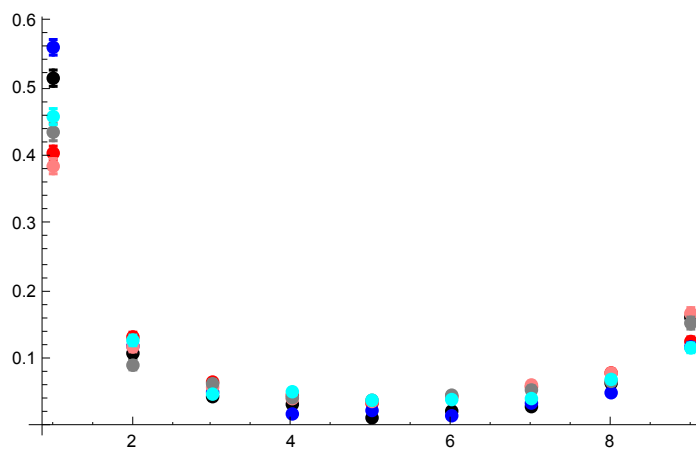

R = 18

SLiM simulations plot

```

datp002R18h01 = Import[
  "SLIM_SFS_F0/SFSTab_R_18_h_0.1_self_0_f_0.02_10b_SLIM.dat", "Table"][[1]];
datp002R18h01CI = Import[
  "SLIM_SFS_F0/SFSTab_R_18_h_0.1_self_0_f_0.02_10b_SLIM.dat", "Table"][[2]];
datp002R18h05 = Import[
  "SLIM_SFS_F0/SFSTab_R_18_h_0.5_self_0_f_0.02_10b_SLIM.dat", "Table"][[1]];
datp002R18h05CI = Import[
  "SLIM_SFS_F0/SFSTab_R_18_h_0.5_self_0_f_0.02_10b_SLIM.dat", "Table"][[2]];
datp002R18h09 = Import[
  "SLIM_SFS_F0/SFSTab_R_18_h_0.9_self_0_f_0.02_10b_SLIM.dat", "Table"][[1]];
datp002R18h09CI = Import[
  "SLIM_SFS_F0/SFSTab_R_18_h_0.9_self_0_f_0.02_10b_SLIM.dat", "Table"][[2]];
datp002R18h01T = Partition[Riffle[Partition[Riffle[Range[9], datp002R18h01], 2],
  Map[ErrorBar, datp002R18h01CI]], 2];
datp002R18h05T = Partition[Riffle[Partition[Riffle[Range[9], datp002R18h05], 2],
  Map[ErrorBar, datp002R18h05CI]], 2];
datp002R18h09T = Partition[Riffle[Partition[Riffle[Range[9], datp002R18h09], 2],
  Map[ErrorBar, datp002R18h09CI]], 2];

```

MSMS simulation results

```

datp002R18h01MSMS =
  Import["SFS_MSMS_SV_5K/SFSTab_R_36_h_0.1_self_0_f_0.02_10b_MSMS.dat",
    "Table"][[1]];
datp002R18h01MSMSCI = Import[
  "SFS_MSMS_SV_5K/SFSTab_R_36_h_0.1_self_0_f_0.02_10b_MSMS.dat",
  "Table"][[2]];
datp002R18h05MSMS = Import[
  "SFS_MSMS_SV_5K/SFSTab_R_36_h_0.5_self_0_f_0.02_10b_MSMS.dat",
  "Table"][[1]];
datp002R18h05MSMSCI = Import[
  "SFS_MSMS_SV_5K/SFSTab_R_36_h_0.5_self_0_f_0.02_10b_MSMS.dat",
  "Table"][[2]];
datp002R18h09MSMS = Import[
  "SFS_MSMS_SV_5K/SFSTab_R_36_h_0.9_self_0_f_0.02_10b_MSMS.dat",
  "Table"][[1]];
datp002R18h09MSMSCI = Import[
  "SFS_MSMS_SV_5K/SFSTab_R_36_h_0.9_self_0_f_0.02_10b_MSMS.dat",
  "Table"][[2]];
datp002R18h01MSMST = Partition[Riffle[Partition[Riffle[Range[9],
  datp002R18h01MSMS], 2], Map[ErrorBar, datp002R18h01MSMSCI]], 2];
datp002R18h05MSMST = Partition[Riffle[Partition[Riffle[Range[9],
  datp002R18h05MSMS], 2], Map[ErrorBar, datp002R18h05MSMSCI]], 2];
datp002R18h09MSMST = Partition[Riffle[Partition[Riffle[Range[9],
  datp002R18h09MSMS], 2], Map[ErrorBar, datp002R18h09MSMSCI]], 2];

```

Analytic plot

```

p1R18 =
ListPlot[{Table[{l, PLNH2[5000, 0.05, 0.1, 0, 18, 10, l, 0.02, 4]}, {l, 1, 9}],
  Table[{l, PLNH2[5000, 0.05, 0.5, 0, 18, 10, l, 0.02, 4]}, {l, 1, 9}],
  Table[{l, PLNH2[5000, 0.05, 0.9, 0, 18, 10, l, 0.02, 4]}, {l, 1, 9}],
  Table[{l, PrJ[l, 10]}, {l, 1, 9}]], PlotRange → All,
PlotStyle → {Red, Black, Blue, {Gray, Dashed}}, Joined → True,
Ticks → {{1, 2, 3, 4, 5, 6, 7, 8, 9}, Automatic},
BaseStyle → {FontWeight → "Bold", FontColor → Black, FontSize → 12}]

```

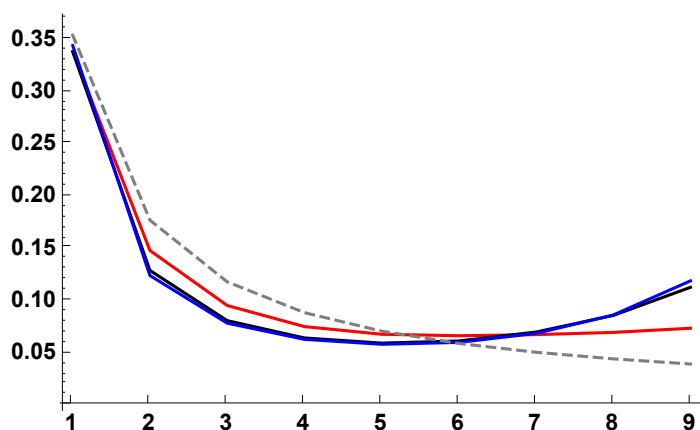

SLiM simulations plot

```

p2R18 = ErrorListPlot[
  {datp002R18h01T, datp002R18h05T, datp002R18h09T}, PlotRange → All, PlotStyle →
  {{Red, PointSize[0.02]}, {Black, PointSize[0.02]}, {Blue, PointSize[0.02]}}]

```

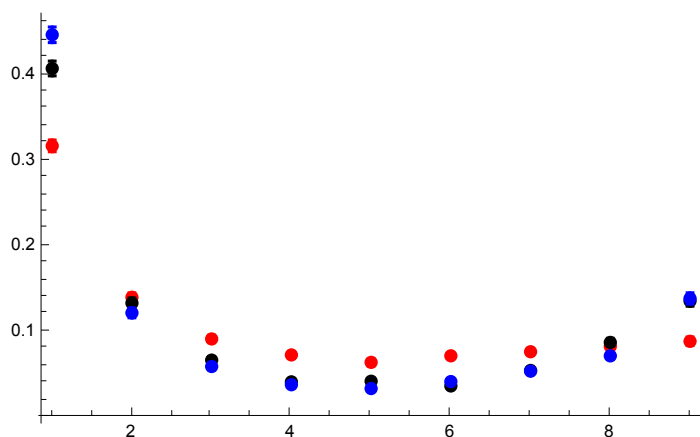

MSMS simulation results

```
p2AR18 = ErrorListPlot[{datp002R18h01MSMST,
  datp002R18h05MSMST, datp002R18h09MSMST}, PlotRange → All, PlotStyle →
  {{Pink, PointSize[0.02]}, {Gray, PointSize[0.02]}, {Cyan, PointSize[0.02]}}]
```

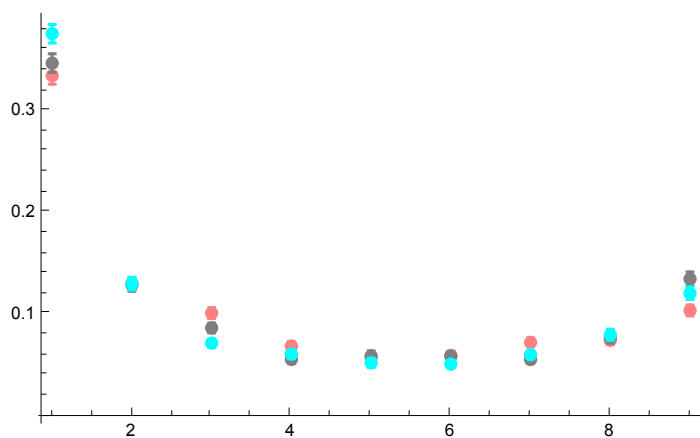

All together

```
p3R18s0p02 = Show[p1R18, p2R18, p2AR18, PlotRange → All, ImageSize → 325]
```

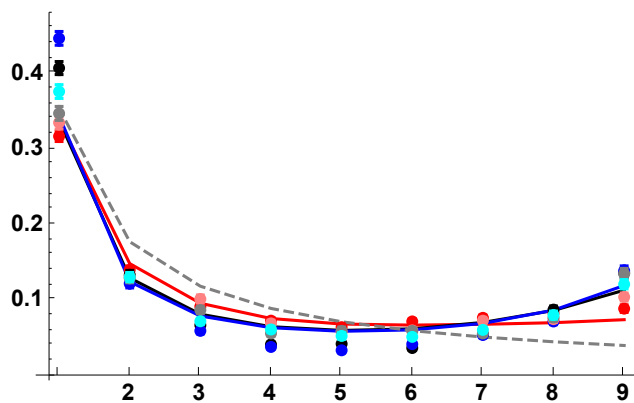

Simulation results only (SLiM and MSMS)

```
p3BR18 = Show[p2R18, p2AR18, PlotRange → All]
```

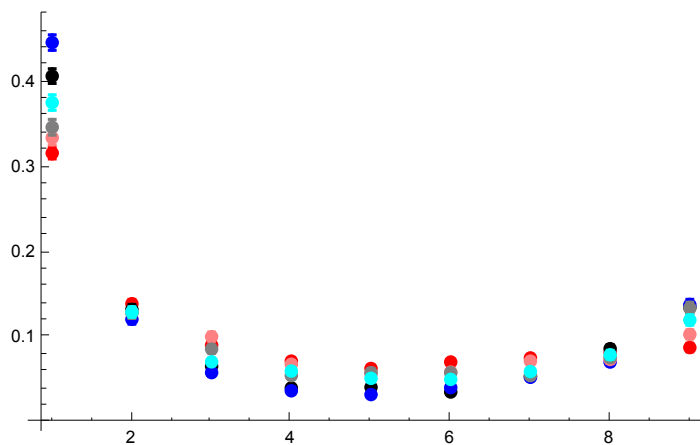

R = 30

SLiM simulations plot



```

datp002R30h01 = Import[
  "SLIM_SFS_F0/SFSTab_R_30_h_0.1_self_0_f_0.02_10b_SLIM.dat", "Table"][[1]];
datp002R30h01CI = Import[
  "SLIM_SFS_F0/SFSTab_R_30_h_0.1_self_0_f_0.02_10b_SLIM.dat", "Table"][[2]];
datp002R30h05 = Import[
  "SLIM_SFS_F0/SFSTab_R_30_h_0.5_self_0_f_0.02_10b_SLIM.dat", "Table"][[1]];
datp002R30h05CI = Import[
  "SLIM_SFS_F0/SFSTab_R_30_h_0.5_self_0_f_0.02_10b_SLIM.dat", "Table"][[2]];
datp002R30h09 = Import[
  "SLIM_SFS_F0/SFSTab_R_30_h_0.9_self_0_f_0.02_10b_SLIM.dat", "Table"][[1]];
datp002R30h09CI = Import[
  "SLIM_SFS_F0/SFSTab_R_30_h_0.9_self_0_f_0.02_10b_SLIM.dat", "Table"][[2]];
datp002R30h01T = Partition[Riffle[Partition[Riffle[Range[9], datp002R30h01], 2],
  Map[ErrorBar, datp002R30h01CI]], 2];
datp002R30h05T = Partition[Riffle[Partition[Riffle[Range[9], datp002R30h05], 2],
  Map[ErrorBar, datp002R30h05CI]], 2];
datp002R30h09T = Partition[Riffle[Partition[Riffle[Range[9], datp002R30h09], 2],
  Map[ErrorBar, datp002R30h09CI]], 2];

```

MSMS simulation results

```

datp002R30h01MSMS =
  Import["SFS_MSMS_SV_5K/SFSTab_R_60_h_0.1_self_0_f_0.02_10b_MSMS.dat",
    "Table"][[1]];
datp002R30h01MSMSCI = Import[
  "SFS_MSMS_SV_5K/SFSTab_R_60_h_0.1_self_0_f_0.02_10b_MSMS.dat",
  "Table"][[2]];
datp002R30h05MSMS = Import[
  "SFS_MSMS_SV_5K/SFSTab_R_60_h_0.5_self_0_f_0.02_10b_MSMS.dat",
  "Table"][[1]];
datp002R30h05MSMSCI = Import[
  "SFS_MSMS_SV_5K/SFSTab_R_60_h_0.5_self_0_f_0.02_10b_MSMS.dat",
  "Table"][[2]];
datp002R30h09MSMS = Import[
  "SFS_MSMS_SV_5K/SFSTab_R_60_h_0.9_self_0_f_0.02_10b_MSMS.dat",
  "Table"][[1]];
datp002R30h09MSMSCI = Import[
  "SFS_MSMS_SV_5K/SFSTab_R_60_h_0.9_self_0_f_0.02_10b_MSMS.dat",
  "Table"][[2]];
datp002R30h01MSMST = Partition[Riffle[Partition[Riffle[Range[9],
  datp002R30h01MSMS], 2], Map[ErrorBar, datp002R30h01MSMSCI]], 2];
datp002R30h05MSMST = Partition[Riffle[Partition[Riffle[Range[9],
  datp002R30h05MSMS], 2], Map[ErrorBar, datp002R30h05MSMSCI]], 2];
datp002R30h09MSMST = Partition[Riffle[Partition[Riffle[Range[9],
  datp002R30h09MSMS], 2], Map[ErrorBar, datp002R30h09MSMSCI]], 2];

```

Analytic res

```

p1R30 =
ListPlot[{Table[{l, PLNH2[5000, 0.05, 0.1, 0, 30, 10, l, 0.02, 4]}, {l, 1, 9}],
  Table[{l, PLNH2[5000, 0.05, 0.5, 0, 30, 10, l, 0.02, 4]}, {l, 1, 9}],
  Table[{l, PLNH2[5000, 0.05, 0.9, 0, 30, 10, l, 0.02, 4]}, {l, 1, 9}],
  Table[{l, PrJ[l, 10]}, {l, 1, 9}]], PlotRange → All,
PlotStyle → {Red, Black, Blue, {Gray, Dashed}}, Joined → True]

```

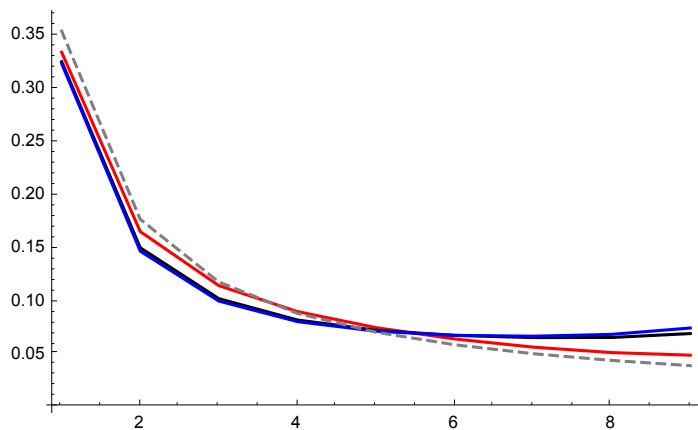

SLiM simulations plot

```

p2R30 = ErrorListPlot[
  {datp002R30h01T, datp002R30h05T, datp002R30h09T}, PlotRange → All, PlotStyle →
    {{Red, PointSize[0.02]}, {Black, PointSize[0.02]}, {Blue, PointSize[0.02]}}]

```

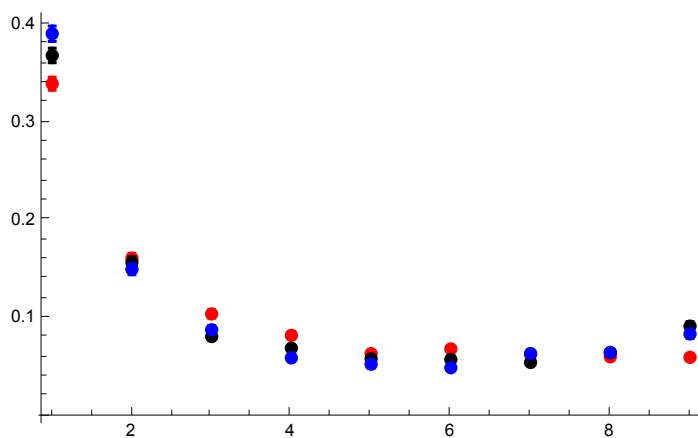

MSMS simulation results

```
p2AR30 = ErrorListPlot[{datp002R30h01MSMST,
  datp002R30h05MSMST, datp002R30h09MSMST}, PlotRange → All, PlotStyle →
  {{Pink, PointSize[0.02]}, {Gray, PointSize[0.02]}, {Cyan, PointSize[0.02]}}]
```

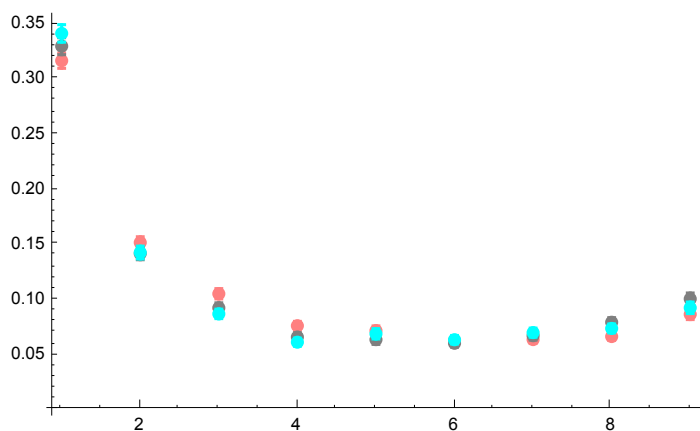

All together

```
p3R30 = Show[p1R30, p2R30, p2AR30, PlotRange → All]
```

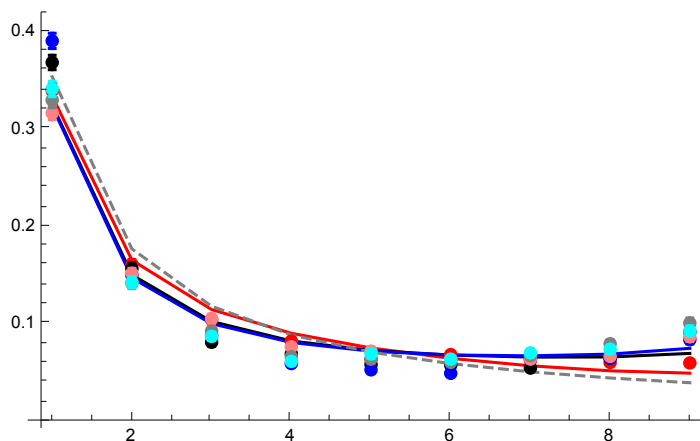

Simulation results only (SLiM and MSMS)

```
p3BR30 = Show[p2R30, p2AR30, PlotRange → All]
```

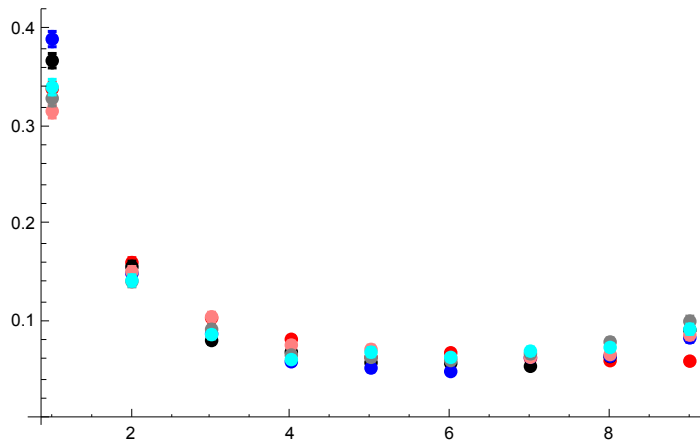

R = 42

Original sim data

```

datp002R42h01 = Import[
  "SLIM_SFS_F0/SFSTab_R_42_h_0.1_self_0_f_0.02_10b_SLIM.dat", "Table"][[1]];
datp002R42h01CI = Import[
  "SLIM_SFS_F0/SFSTab_R_42_h_0.1_self_0_f_0.02_10b_SLIM.dat", "Table"][[2]];
datp002R42h05 = Import[
  "SLIM_SFS_F0/SFSTab_R_42_h_0.5_self_0_f_0.02_10b_SLIM.dat", "Table"][[1]];
datp002R42h05CI = Import[
  "SLIM_SFS_F0/SFSTab_R_42_h_0.5_self_0_f_0.02_10b_SLIM.dat", "Table"][[2]];
datp002R42h09 = Import[
  "SLIM_SFS_F0/SFSTab_R_42_h_0.9_self_0_f_0.02_10b_SLIM.dat", "Table"][[1]];
datp002R42h09CI = Import[
  "SLIM_SFS_F0/SFSTab_R_42_h_0.9_self_0_f_0.02_10b_SLIM.dat", "Table"][[2]];
datp002R42h01T = Partition[Riffle[Partition[Riffle[Range[9], datp002R42h01], 2],
  Map[ErrorBar, datp002R42h01CI]], 2];
datp002R42h05T = Partition[Riffle[Partition[Riffle[Range[9], datp002R42h05], 2],
  Map[ErrorBar, datp002R42h05CI]], 2];
datp002R42h09T = Partition[Riffle[Partition[Riffle[Range[9], datp002R42h09], 2],
  Map[ErrorBar, datp002R42h09CI]], 2];

```

MSMS Sim data

```

datp002R42h01MSMS =
  Import["SFS_MSMS_SV_5K/SFSTab_R_84_h_0.1_self_0_f_0.02_10b_MSMS.dat",
    "Table"][[1]];
datp002R42h01MSMSCI = Import[
  "SFS_MSMS_SV_5K/SFSTab_R_84_h_0.1_self_0_f_0.02_10b_MSMS.dat",
  "Table"][[2]];
datp002R42h05MSMS = Import[
  "SFS_MSMS_SV_5K/SFSTab_R_84_h_0.5_self_0_f_0.02_10b_MSMS.dat",
  "Table"][[1]];
datp002R42h05MSMSCI = Import[
  "SFS_MSMS_SV_5K/SFSTab_R_84_h_0.5_self_0_f_0.02_10b_MSMS.dat",
  "Table"][[2]];
datp002R42h09MSMS = Import[
  "SFS_MSMS_SV_5K/SFSTab_R_84_h_0.9_self_0_f_0.02_10b_MSMS.dat",
  "Table"][[1]];
datp002R42h09MSMSCI = Import[
  "SFS_MSMS_SV_5K/SFSTab_R_84_h_0.9_self_0_f_0.02_10b_MSMS.dat",
  "Table"][[2]];
datp002R42h01MSMST = Partition[Riffle[Partition[Riffle[Range[9],
  datp002R42h01MSMS], 2], Map[ErrorBar, datp002R42h01MSMSCI]], 2];
datp002R42h05MSMST = Partition[Riffle[Partition[Riffle[Range[9],
  datp002R42h05MSMS], 2], Map[ErrorBar, datp002R42h05MSMSCI]], 2];
datp002R42h09MSMST = Partition[Riffle[Partition[Riffle[Range[9],
  datp002R42h09MSMS], 2], Map[ErrorBar, datp002R42h09MSMSCI]], 2];

```

Analytic res

p1R42 =

```
ListPlot[{Table[{l, PLNH2[5000, 0.05, 0.1, 0, 42, 10, l, 0.02, 4]}, {l, 1, 9}],
  Table[{l, PLNH2[5000, 0.05, 0.5, 0, 42, 10, l, 0.02, 4]}, {l, 1, 9}],
  Table[{l, PLNH2[5000, 0.05, 0.9, 0, 42, 10, l, 0.02, 4]}, {l, 1, 9}],
  Table[{l, PrJ[l, 10]}, {l, 1, 9}]], PlotRange → All,
  PlotStyle → {Red, Black, Blue, {Gray, Dashed}}, Joined → True]
```

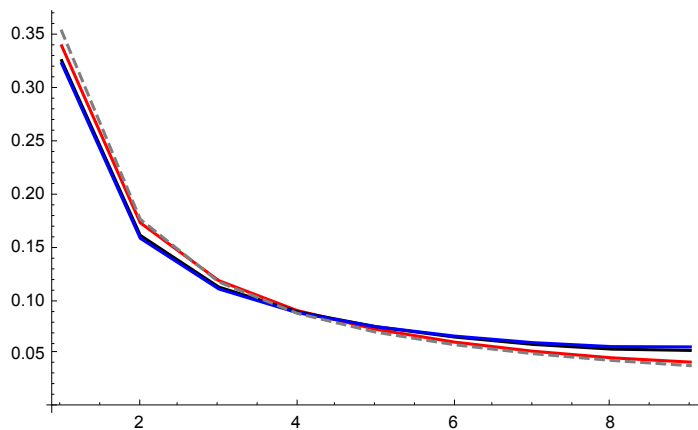

SLiM simulations plot

```
p2R42 = ErrorListPlot[
  {datp002R42h01T, datp002R42h05T, datp002R42h09T}, PlotRange → All, PlotStyle →
  {{Red, PointSize[0.02]}, {Black, PointSize[0.02]}, {Blue, PointSize[0.02]}}
```

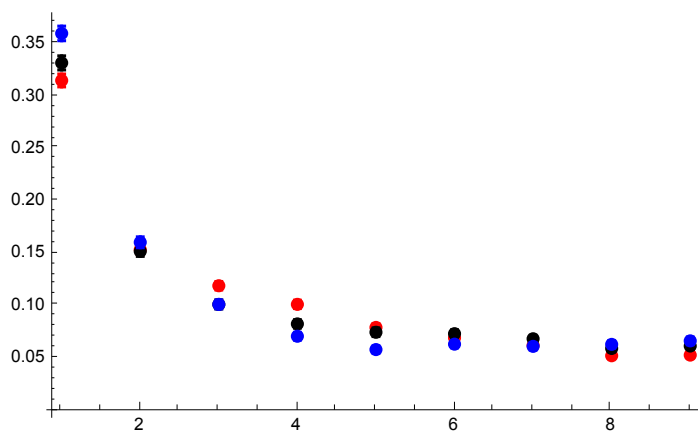

MSMS simulation results

```
p2AR42 = ErrorListPlot[{datp002R42h01MSMST,
  datp002R42h05MSMST, datp002R42h09MSMST}, PlotRange → All, PlotStyle →
  {{Pink, PointSize[0.02]}, {Gray, PointSize[0.02]}, {Cyan, PointSize[0.02]}}]
```

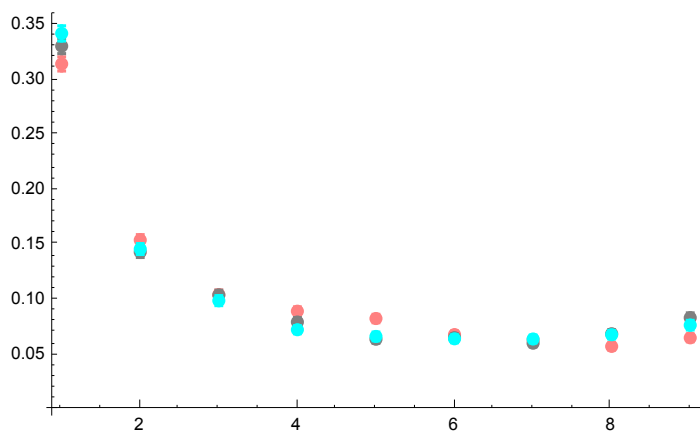

All together

```
p3R42 = Show[p1R42, p2R42, p2AR42, PlotRange → All]
```

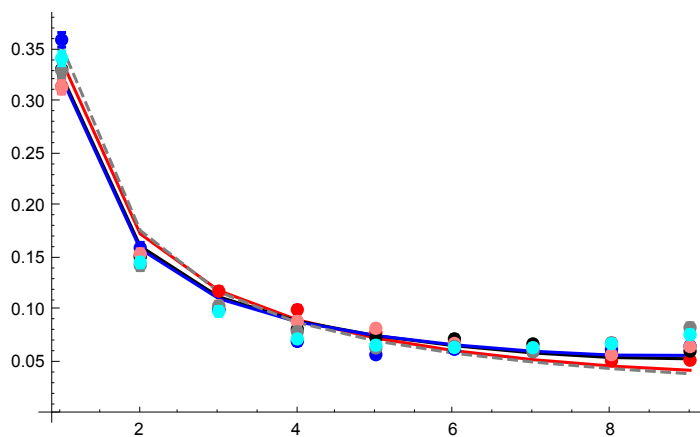

Simulation results only (SLiM and MSMS)

```
p3BR42 = Show[p2R42, p2AR42, PlotRange → All]
```

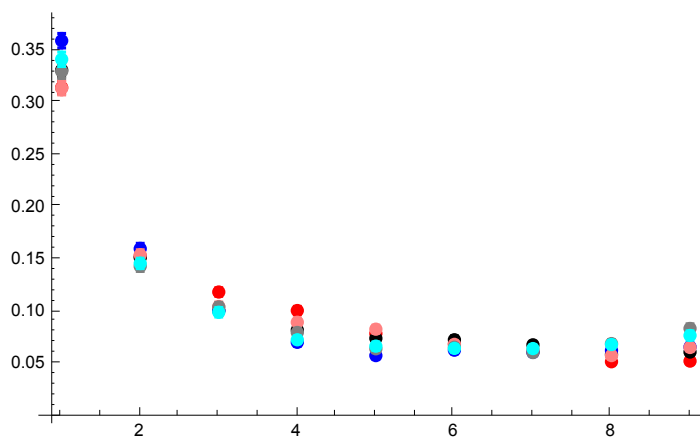

All plots compared

GraphicsGrid[{{p3R6s0p02, p3R18s0p02}, {p3R30, p3R42}}]

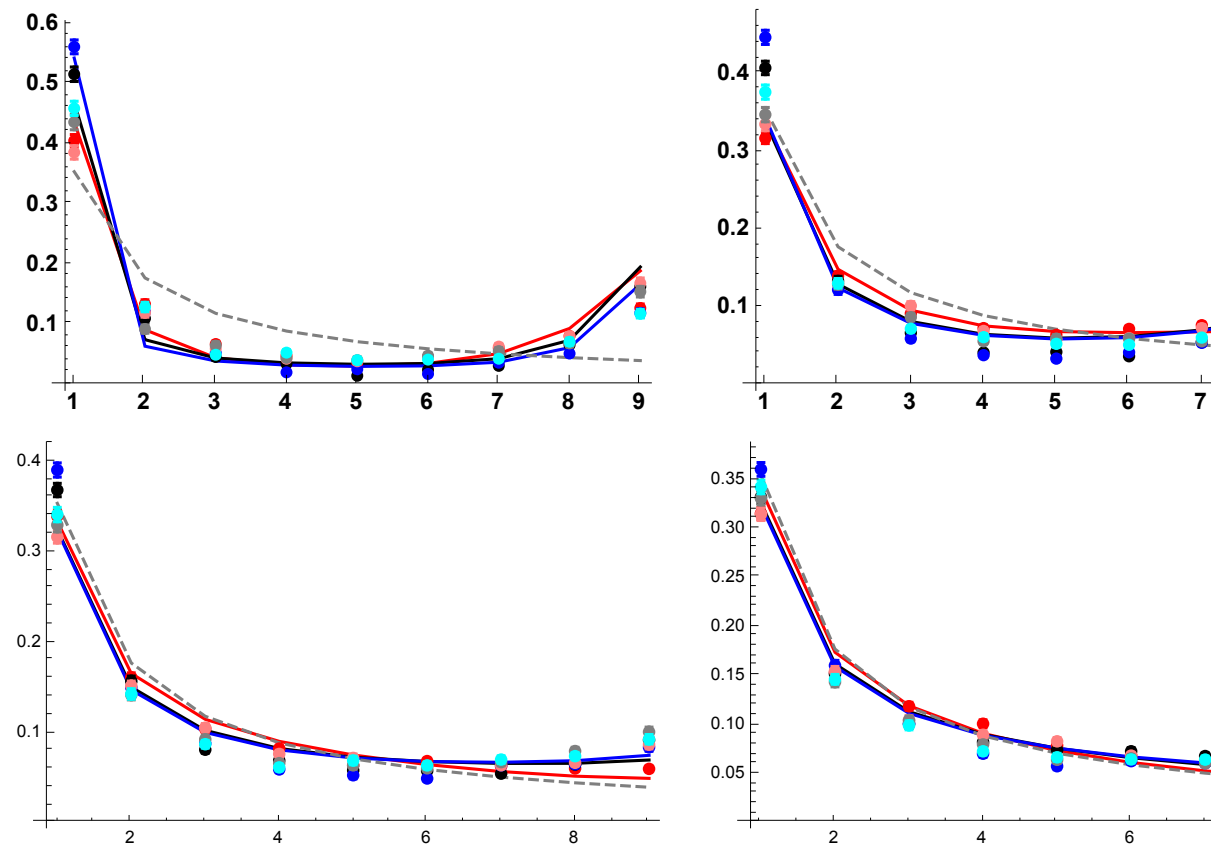

## Results with $p_0 = 0.05$

R = 6

Original sim results

```
datp005R6h01 = Import[
  "SLIM_SFS_F0/SFSTab_R_6_h_0.1_self_0_f_0.05_10b_SLIM.dat", "Table"][[1]];
datp005R6h01CI = Import[
  "SLIM_SFS_F0/SFSTab_R_6_h_0.1_self_0_f_0.05_10b_SLIM.dat", "Table"][[2]];
datp005R6h05 = Import["SLIM_SFS_F0/SFSTab_R_6_h_0.5_self_0_f_0.05_10b_SLIM.dat",
  "Table"][[1]];
datp005R6h05CI = Import[
  "SLIM_SFS_F0/SFSTab_R_6_h_0.5_self_0_f_0.05_10b_SLIM.dat", "Table"][[2]];
datp005R6h09 = Import["SLIM_SFS_F0/SFSTab_R_6_h_0.9_self_0_f_0.05_10b_SLIM.dat",
  "Table"][[1]];
datp005R6h09CI = Import[
  "SLIM_SFS_F0/SFSTab_R_6_h_0.9_self_0_f_0.05_10b_SLIM.dat", "Table"][[2]];
datp005R6h01T = Partition[Riffle[Partition[Riffle[Range[9], datp005R6h01], 2],
  Map[ErrorBar, datp005R6h01CI]], 2];
datp005R6h05T = Partition[Riffle[Partition[Riffle[Range[9], datp005R6h05], 2],
  Map[ErrorBar, datp005R6h05CI]], 2];
datp005R6h09T = Partition[Riffle[Partition[Riffle[Range[9], datp005R6h09], 2],
  Map[ErrorBar, datp005R6h09CI]], 2];
```

MSMS Sim results

```

datp005R6h01MSMS =
  Import["SFS_MSMS_SV_5K/SFSTab_R_12_h_0.1_self_0_f_0.05_10b_MSMS.dat",
    "Table"][[1]];
datp005R6h01MSMSCI = Import[
  "SFS_MSMS_SV_5K/SFSTab_R_12_h_0.1_self_0_f_0.05_10b_MSMS.dat",
  "Table"][[2]];
datp005R6h05MSMS = Import[
  "SFS_MSMS_SV_5K/SFSTab_R_12_h_0.5_self_0_f_0.05_10b_MSMS.dat",
  "Table"][[1]];
datp005R6h05MSMSCI = Import[
  "SFS_MSMS_SV_5K/SFSTab_R_12_h_0.5_self_0_f_0.05_10b_MSMS.dat",
  "Table"][[2]];
datp005R6h09MSMS = Import[
  "SFS_MSMS_SV_5K/SFSTab_R_12_h_0.9_self_0_f_0.05_10b_MSMS.dat",
  "Table"][[1]];
datp005R6h09MSMSCI = Import[
  "SFS_MSMS_SV_5K/SFSTab_R_12_h_0.9_self_0_f_0.05_10b_MSMS.dat",
  "Table"][[2]];
datp005R6h01MSMST = Partition[Riffle[Partition[Riffle[Range[9],
  datp005R6h01MSMS], 2], Map[ErrorBar, datp005R6h01MSMSCI]], 2];
datp005R6h05MSMST = Partition[Riffle[Partition[Riffle[Range[9],
  datp005R6h05MSMS], 2], Map[ErrorBar, datp005R6h05MSMSCI]], 2];
datp005R6h09MSMST = Partition[Riffle[Partition[Riffle[Range[9],
  datp005R6h09MSMS], 2], Map[ErrorBar, datp005R6h09MSMSCI]], 2];

p1R6 = ListPlot[{Table[{l, PLN2[5000, 0.05, 0.1, 0, 6, 10, l, 0.05, 4]}, {l, 1, 9}],
  Table[{l, PLN2[5000, 0.05, 0.5, 0, 6, 10, l, 0.05, 4]}, {l, 1, 9}],
  Table[{l, PLN2[5000, 0.05, 0.9, 0, 6, 10, l, 0.05, 4]}, {l, 1, 9}],
  Table[{l, PrJ[l, 10]}], {l, 1, 9}]], PlotRange -> All,
  PlotStyle -> {Red, Black, Blue, {Gray, Dashed}}, Joined -> True,
  Ticks -> {{1, 2, 3, 4, 5, 6, 7, 8, 9}, Automatic},
  BaseStyle -> {FontWeight -> "Bold", FontColor -> Black, FontSize -> 12}]

```

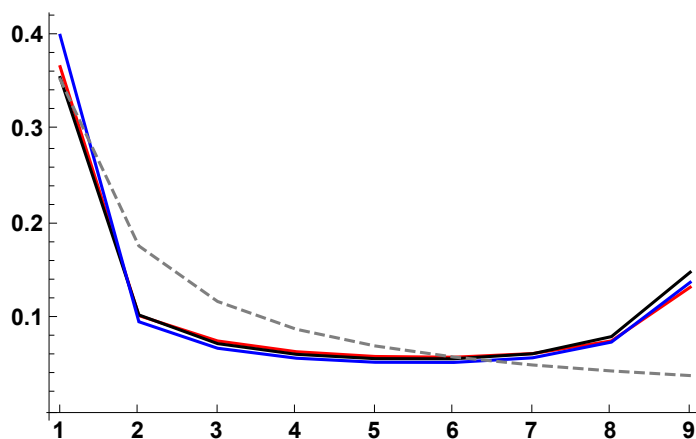

SLiM simulations plot



```
p2R6 = ErrorListPlot[
  {datp005R6h01T, datp005R6h05T, datp005R6h09T}, PlotRange → All, PlotStyle →
  {{Red, PointSize[0.02]}, {Black, PointSize[0.02]}, {Blue, PointSize[0.02]}}
```

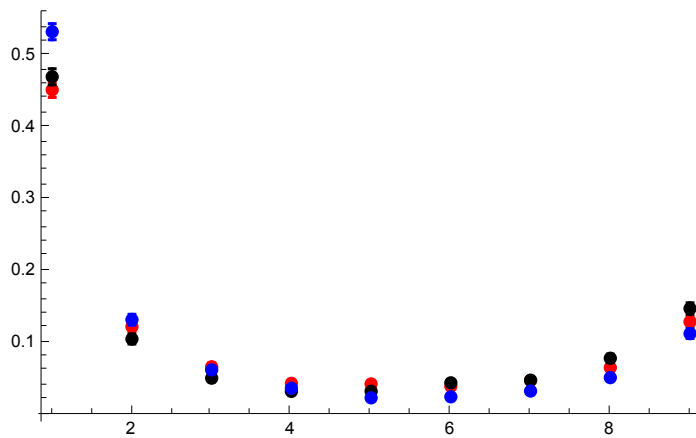

MSMS simulation results

```
p2AR6 = ErrorListPlot[{datp005R6h01MSMST, datp005R6h05MSMST, datp005R6h09MSMST},
  PlotRange → All, PlotStyle →
  {{Pink, PointSize[0.02]}, {Gray, PointSize[0.02]}, {Cyan, PointSize[0.02]}}
```

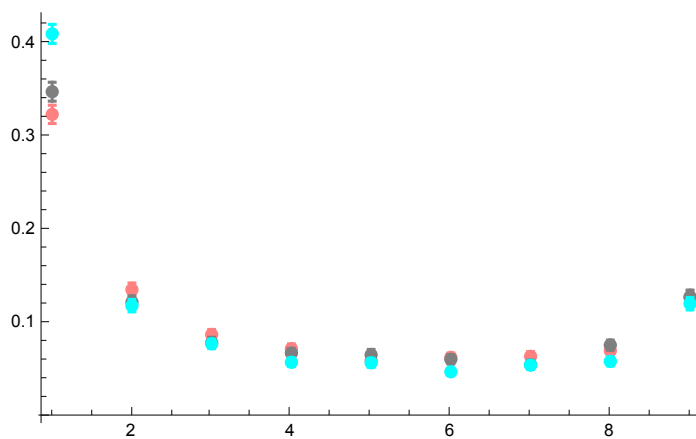

All together

```
p3R6s0p05 = Show[p1R6, p2R6, p2AR6, PlotRange → All, ImageSize → 325]
```

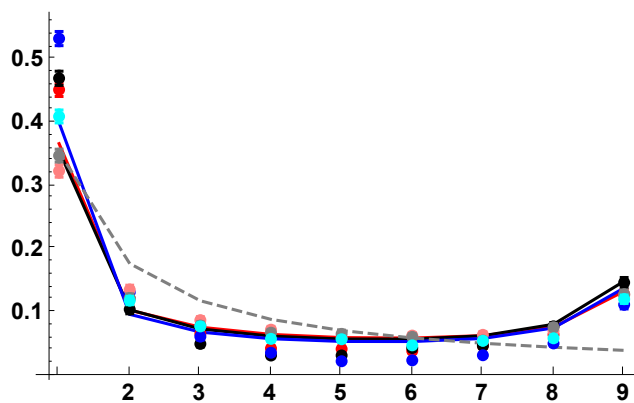

SLiM Simulations and analytical results

```
p3AR6s0p05 = Show[p1R6, p2R6, PlotRange -> All, ImageSize -> 325]
```

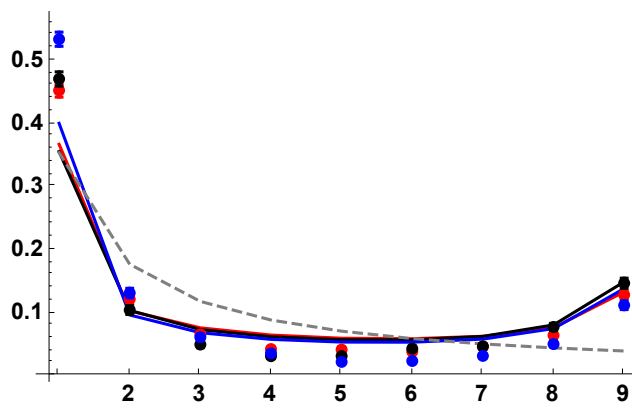

Simulation results only (SLiM and MSMS)

```
p3BR6 = Show[p2R6, p2AR6, PlotRange -> All]
```

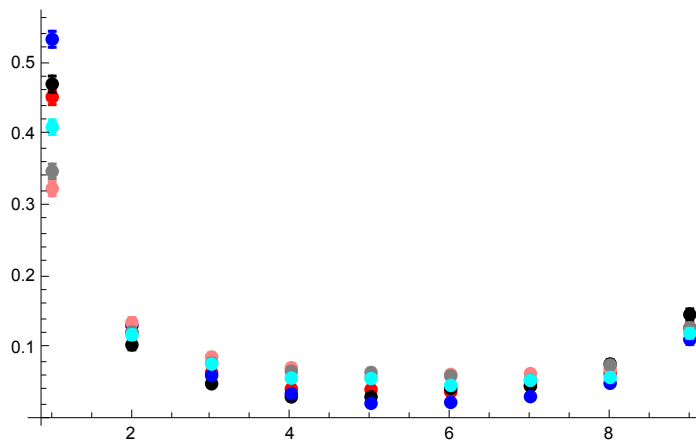

$R = 18$

SLiM simulations plot

```

datp005R18h01 = Import[
  "SLIM_SFS_F0/SFSTab_R_18_h_0.1_self_0_f_0.05_10b_SLIM.dat", "Table"][[1]];
datp005R18h01CI = Import[
  "SLIM_SFS_F0/SFSTab_R_18_h_0.1_self_0_f_0.05_10b_SLIM.dat", "Table"][[2]];
datp005R18h05 = Import[
  "SLIM_SFS_F0/SFSTab_R_18_h_0.5_self_0_f_0.05_10b_SLIM.dat", "Table"][[1]];
datp005R18h05CI = Import[
  "SLIM_SFS_F0/SFSTab_R_18_h_0.5_self_0_f_0.05_10b_SLIM.dat", "Table"][[2]];
datp005R18h09 = Import[
  "SLIM_SFS_F0/SFSTab_R_18_h_0.9_self_0_f_0.05_10b_SLIM.dat", "Table"][[1]];
datp005R18h09CI = Import[
  "SLIM_SFS_F0/SFSTab_R_18_h_0.9_self_0_f_0.05_10b_SLIM.dat", "Table"][[2]];
datp005R18h01T = Partition[Riffle[Partition[Riffle[Range[9], datp005R18h01], 2],
  Map[ErrorBar, datp005R18h01CI]], 2];
datp005R18h05T = Partition[Riffle[Partition[Riffle[Range[9], datp005R18h05], 2],
  Map[ErrorBar, datp005R18h05CI]], 2];
datp005R18h09T = Partition[Riffle[Partition[Riffle[Range[9], datp005R18h09], 2],
  Map[ErrorBar, datp005R18h09CI]], 2];

```

MSMS simulation results

```

datp005R18h01MSMS =
  Import["SFS_MSMS_SV_5K/SFSTab_R_36_h_0.1_self_0_f_0.05_10b_MSMS.dat",
    "Table"][[1]];
datp005R18h01MSMSCI = Import[
  "SFS_MSMS_SV_5K/SFSTab_R_36_h_0.1_self_0_f_0.05_10b_MSMS.dat",
  "Table"][[2]];
datp005R18h05MSMS = Import[
  "SFS_MSMS_SV_5K/SFSTab_R_36_h_0.5_self_0_f_0.05_10b_MSMS.dat",
  "Table"][[1]];
datp005R18h05MSMSCI = Import[
  "SFS_MSMS_SV_5K/SFSTab_R_36_h_0.5_self_0_f_0.05_10b_MSMS.dat",
  "Table"][[2]];
datp005R18h09MSMS = Import[
  "SFS_MSMS_SV_5K/SFSTab_R_36_h_0.9_self_0_f_0.05_10b_MSMS.dat",
  "Table"][[1]];
datp005R18h09MSMSCI = Import[
  "SFS_MSMS_SV_5K/SFSTab_R_36_h_0.9_self_0_f_0.05_10b_MSMS.dat",
  "Table"][[2]];
datp005R18h01MSMST = Partition[Riffle[Partition[Riffle[Range[9],
  datp005R18h01MSMS], 2], Map[ErrorBar, datp005R18h01MSMSCI]], 2];
datp005R18h05MSMST = Partition[Riffle[Partition[Riffle[Range[9],
  datp005R18h05MSMS], 2], Map[ErrorBar, datp005R18h05MSMSCI]], 2];
datp005R18h09MSMST = Partition[Riffle[Partition[Riffle[Range[9],
  datp005R18h09MSMS], 2], Map[ErrorBar, datp005R18h09MSMSCI]], 2];

```

Analytic results

```

p1R18 =
ListPlot[{Table[{l, PLNH2[5000, 0.05, 0.1, 0, 18, 10, l, 0.05, 4]}, {l, 1, 9}],
  Table[{l, PLNH2[5000, 0.05, 0.5, 0, 18, 10, l, 0.05, 4]}, {l, 1, 9}],
  Table[{l, PLNH2[5000, 0.05, 0.9, 0, 18, 10, l, 0.05, 4]}, {l, 1, 9}],
  Table[{l, PrJ[l, 10]}, {l, 1, 9}]], PlotRange → All,
PlotStyle → {Red, Black, Blue, {Gray, Dashed}}, Joined → True,
Ticks → {{1, 2, 3, 4, 5, 6, 7, 8, 9}, Automatic},
BaseStyle → {FontWeight → "Bold", FontColor → Black, FontSize → 12}]

```

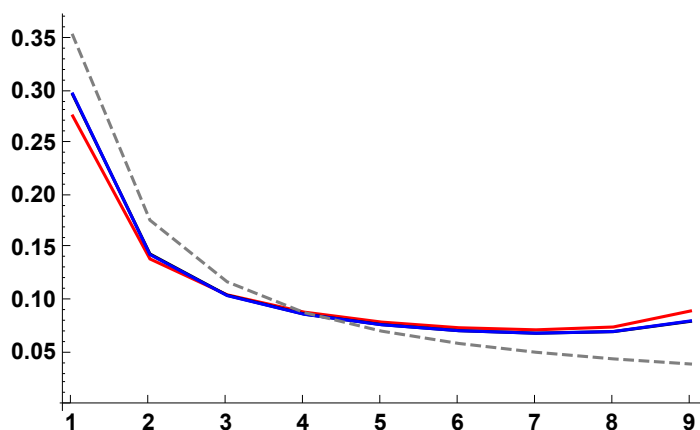

SLiM simulations plot

```

p2R18 = ErrorListPlot[
  {datp005R18h01T, datp005R18h05T, datp005R18h09T}, PlotRange → All, PlotStyle →
  {{Red, PointSize[0.02]}, {Black, PointSize[0.02]}, {Blue, PointSize[0.02]}}]

```

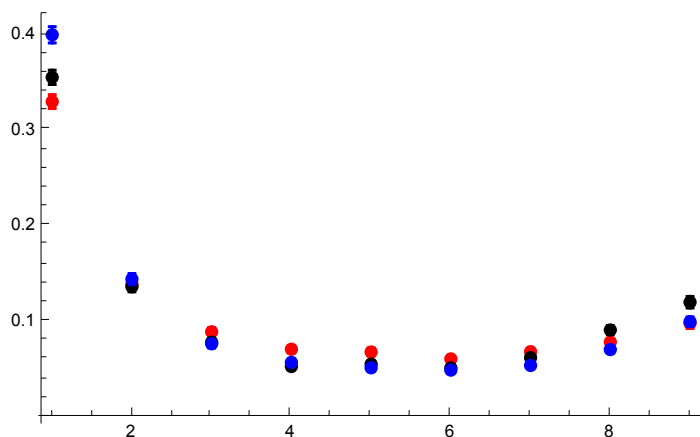

MSMS simulation results

```
p2AR18 = ErrorListPlot[{datp005R18h01MSMST,
  datp005R18h05MSMST, datp005R18h09MSMST}, PlotRange → All, PlotStyle →
  {{Pink, PointSize[0.02]}, {Gray, PointSize[0.02]}, {Cyan, PointSize[0.02]}}]
```

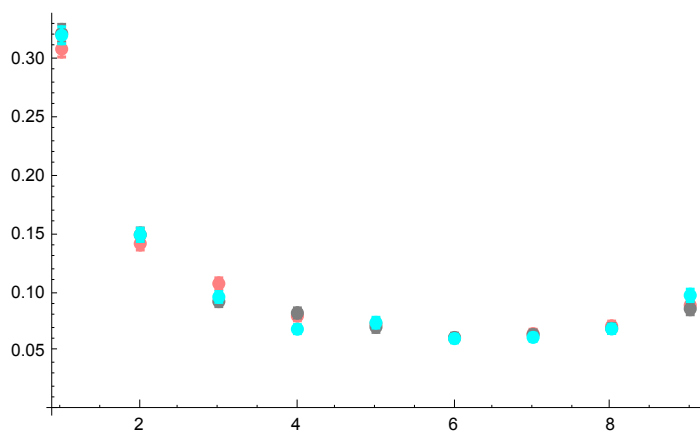

All together

```
p3R18s0p05 = Show[p1R18, p2R18, p2AR18, PlotRange → All, ImageSize → 325]
```

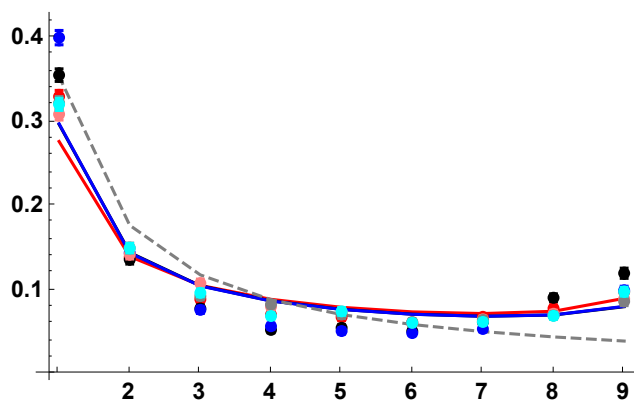

Simulation results only (SLiM and MSMS)

```
p3BR18 = Show[p2R18, p2AR18, PlotRange → All]
```

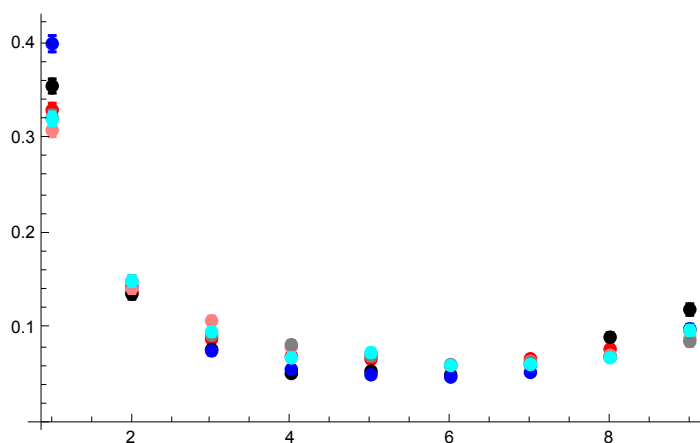

R = 30

SLiM simulations plot

```

datp005R30h01 = Import[
  "SLIM_SFS_F0/SFSTab_R_30_h_0.1_self_0_f_0.05_10b_SLIM.dat", "Table"][[1]];
datp005R30h01CI = Import[
  "SLIM_SFS_F0/SFSTab_R_30_h_0.1_self_0_f_0.05_10b_SLIM.dat", "Table"][[2]];
datp005R30h05 = Import[
  "SLIM_SFS_F0/SFSTab_R_30_h_0.5_self_0_f_0.05_10b_SLIM.dat", "Table"][[1]];
datp005R30h05CI = Import[
  "SLIM_SFS_F0/SFSTab_R_30_h_0.5_self_0_f_0.05_10b_SLIM.dat", "Table"][[2]];
datp005R30h09 = Import[
  "SLIM_SFS_F0/SFSTab_R_30_h_0.9_self_0_f_0.05_10b_SLIM.dat", "Table"][[1]];
datp005R30h09CI = Import[
  "SLIM_SFS_F0/SFSTab_R_30_h_0.9_self_0_f_0.05_10b_SLIM.dat", "Table"][[2]];
datp005R30h01T = Partition[Riffle[Partition[Riffle[Range[9], datp005R30h01], 2],
  Map[ErrorBar, datp005R30h01CI]], 2];
datp005R30h05T = Partition[Riffle[Partition[Riffle[Range[9], datp005R30h05], 2],
  Map[ErrorBar, datp005R30h05CI]], 2];
datp005R30h09T = Partition[Riffle[Partition[Riffle[Range[9], datp005R30h09], 2],
  Map[ErrorBar, datp005R30h09CI]], 2];

MSMS simulation results

datp005R30h01MSMS =
  Import["SFS_MSMS_SV_5K/SFSTab_R_60_h_0.1_self_0_f_0.05_10b_MSMS.dat",
    "Table"][[1]];
datp005R30h01MSMSCI = Import[
  "SFS_MSMS_SV_5K/SFSTab_R_60_h_0.1_self_0_f_0.05_10b_MSMS.dat",
  "Table"][[2]];
datp005R30h05MSMS = Import[
  "SFS_MSMS_SV_5K/SFSTab_R_60_h_0.5_self_0_f_0.05_10b_MSMS.dat",
  "Table"][[1]];
datp005R30h05MSMSCI = Import[
  "SFS_MSMS_SV_5K/SFSTab_R_60_h_0.5_self_0_f_0.05_10b_MSMS.dat",
  "Table"][[2]];
datp005R30h09MSMS = Import[
  "SFS_MSMS_SV_5K/SFSTab_R_60_h_0.9_self_0_f_0.05_10b_MSMS.dat",
  "Table"][[1]];
datp005R30h09MSMSCI = Import[
  "SFS_MSMS_SV_5K/SFSTab_R_60_h_0.9_self_0_f_0.05_10b_MSMS.dat",
  "Table"][[2]];
datp005R30h01MSMST = Partition[Riffle[Partition[Riffle[Range[9],
  datp005R30h01MSMS], 2], Map[ErrorBar, datp005R30h01MSMSCI]], 2];
datp005R30h05MSMST = Partition[Riffle[Partition[Riffle[Range[9],
  datp005R30h05MSMS], 2], Map[ErrorBar, datp005R30h05MSMSCI]], 2];
datp005R30h09MSMST = Partition[Riffle[Partition[Riffle[Range[9],
  datp005R30h09MSMS], 2], Map[ErrorBar, datp005R30h09MSMSCI]], 2];

```

```

p1R30 =
ListPlot[{Table[{l, PLNH2[5000, 0.05, 0.1, 0, 30, 10, l, 0.05, 4]}, {l, 1, 9}],
  Table[{l, PLNH2[5000, 0.05, 0.5, 0, 30, 10, l, 0.05, 4]}, {l, 1, 9}],
  Table[{l, PLNH2[5000, 0.05, 0.9, 0, 30, 10, l, 0.05, 4]}, {l, 1, 9}],
  Table[{l, PrJ[l, 10]}, {l, 1, 9}]], PlotRange → All,
PlotStyle → {Red, Black, Blue, {Gray, Dashed}}, Joined → True]

```

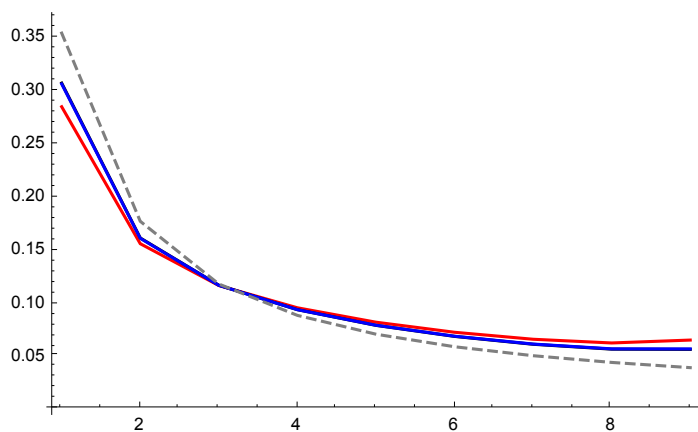

SLiM simulations plot

```

p2R30 = ErrorListPlot[
  {datp005R30h01T, datp005R30h05T, datp005R30h09T}, PlotRange → All, PlotStyle →
  {{Red, PointSize[0.02]}, {Black, PointSize[0.02]}, {Blue, PointSize[0.02]}}]

```

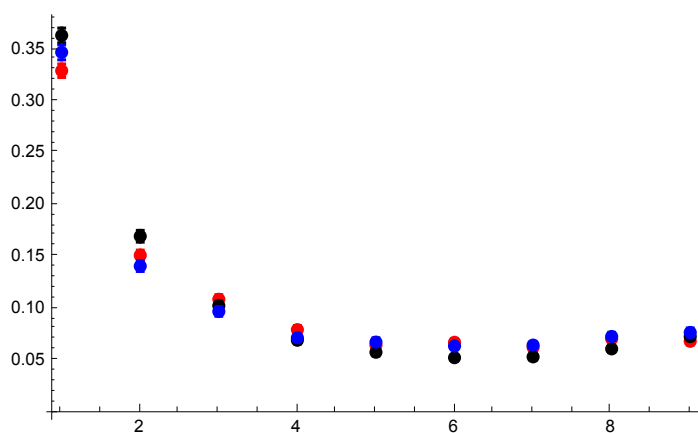

MSMS simulation results

```
p2AR30 = ErrorListPlot[{datp005R30h01MSMST,
  datp005R30h05MSMST, datp005R30h09MSMST}, PlotRange → All, PlotStyle →
  {{Pink, PointSize[0.02]}, {Gray, PointSize[0.02]}, {Cyan, PointSize[0.02]}}]
```

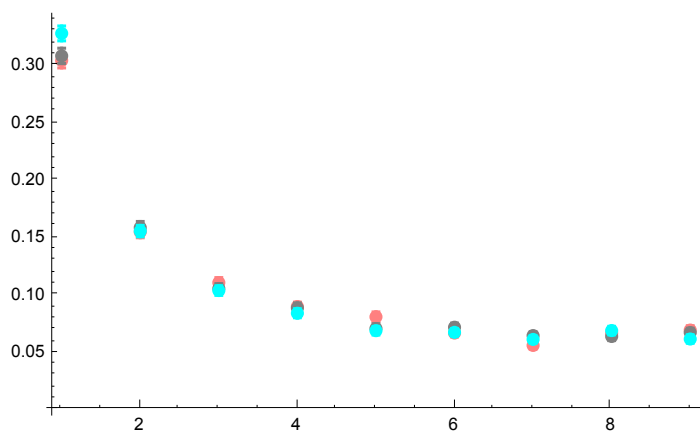

All together

```
p3R30 = Show[p1R30, p2R30, p2AR30, PlotRange → All]
```

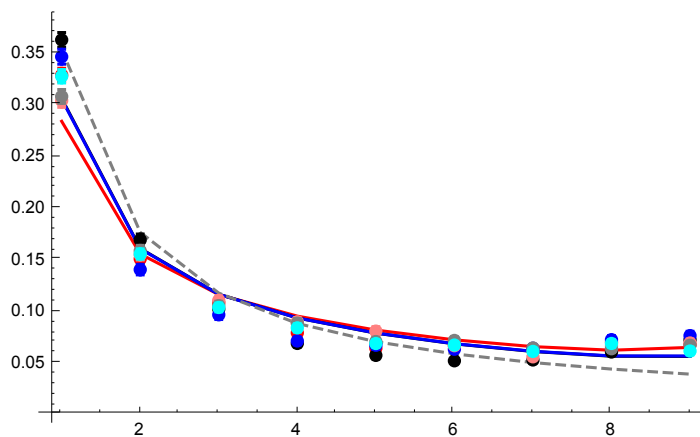

Simulation results only (SLiM and MSMS)

```
p3BR30 = Show[p2R30, p2AR30, PlotRange → All]
```

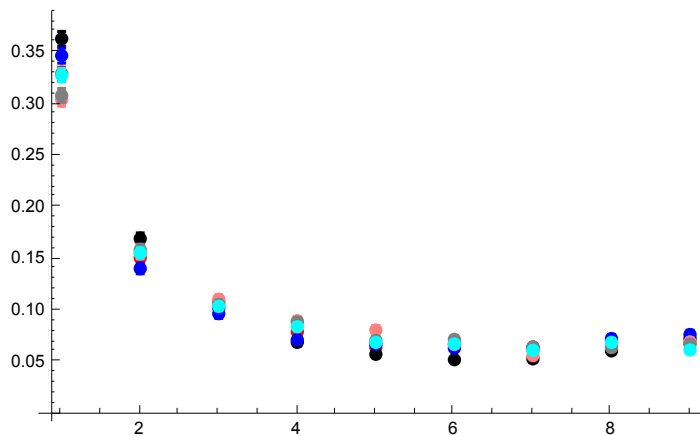

R = 42

Original sim data



```

datp005R42h01 = Import[
  "SLIM_SFS_F0/SFSTab_R_42_h_0.1_self_0_f_0.05_10b_SLIM.dat", "Table"][[1]];
datp005R42h01CI = Import[
  "SLIM_SFS_F0/SFSTab_R_42_h_0.1_self_0_f_0.05_10b_SLIM.dat", "Table"][[2]];
datp005R42h05 = Import[
  "SLIM_SFS_F0/SFSTab_R_42_h_0.5_self_0_f_0.05_10b_SLIM.dat", "Table"][[1]];
datp005R42h05CI = Import[
  "SLIM_SFS_F0/SFSTab_R_42_h_0.5_self_0_f_0.05_10b_SLIM.dat", "Table"][[2]];
datp005R42h09 = Import[
  "SLIM_SFS_F0/SFSTab_R_42_h_0.9_self_0_f_0.05_10b_SLIM.dat", "Table"][[1]];
datp005R42h09CI = Import[
  "SLIM_SFS_F0/SFSTab_R_42_h_0.9_self_0_f_0.05_10b_SLIM.dat", "Table"][[2]];
datp005R42h01T = Partition[Riffle[Partition[Riffle[Range[9], datp005R42h01], 2],
  Map[ErrorBar, datp005R42h01CI]], 2];
datp005R42h05T = Partition[Riffle[Partition[Riffle[Range[9], datp005R42h05], 2],
  Map[ErrorBar, datp005R42h05CI]], 2];
datp005R42h09T = Partition[Riffle[Partition[Riffle[Range[9], datp005R42h09], 2],
  Map[ErrorBar, datp005R42h09CI]], 2];

```

MSMS simulation results

```

datp005R42h01MSMS =
  Import["SFS_MSMS_SV_5K/SFSTab_R_84_h_0.1_self_0_f_0.05_10b_MSMS.dat",
    "Table"][[1]];
datp005R42h01MSMSCI = Import[
  "SFS_MSMS_SV_5K/SFSTab_R_84_h_0.1_self_0_f_0.05_10b_MSMS.dat",
  "Table"][[2]];
datp005R42h05MSMS = Import[
  "SFS_MSMS_SV_5K/SFSTab_R_84_h_0.5_self_0_f_0.05_10b_MSMS.dat",
  "Table"][[1]];
datp005R42h05MSMSCI = Import[
  "SFS_MSMS_SV_5K/SFSTab_R_84_h_0.5_self_0_f_0.05_10b_MSMS.dat",
  "Table"][[2]];
datp005R42h09MSMS = Import[
  "SFS_MSMS_SV_5K/SFSTab_R_84_h_0.9_self_0_f_0.05_10b_MSMS.dat",
  "Table"][[1]];
datp005R42h09MSMSCI = Import[
  "SFS_MSMS_SV_5K/SFSTab_R_84_h_0.9_self_0_f_0.05_10b_MSMS.dat",
  "Table"][[2]];
datp005R42h01MSMST = Partition[Riffle[Partition[Riffle[Range[9],
  datp005R42h01MSMS], 2], Map[ErrorBar, datp005R42h01MSMSCI]], 2];
datp005R42h05MSMST = Partition[Riffle[Partition[Riffle[Range[9],
  datp005R42h05MSMS], 2], Map[ErrorBar, datp005R42h05MSMSCI]], 2];
datp005R42h09MSMST = Partition[Riffle[Partition[Riffle[Range[9],
  datp005R42h09MSMS], 2], Map[ErrorBar, datp005R42h09MSMSCI]], 2];

```

Analytical solutions

```

p1R42 =
ListPlot[{Table[{l, PLNH2[5000, 0.05, 0.1, 0, 42, 10, l, 0.05, 4]}, {l, 1, 9}],
  Table[{l, PLNH2[5000, 0.05, 0.5, 0, 42, 10, l, 0.05, 4]}, {l, 1, 9}],
  Table[{l, PLNH2[5000, 0.05, 0.9, 0, 42, 10, l, 0.05, 4]}, {l, 1, 9}],
  Table[{l, PrJ[l, 10]}, {l, 1, 9}]], PlotRange → All,
PlotStyle → {Red, Black, Blue, {Gray, Dashed}}, Joined → True]

```

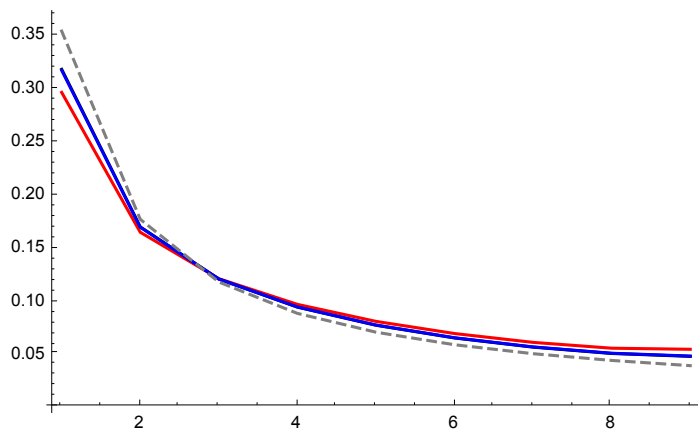

SLiM simulations plot

```

p2R42 = ErrorListPlot[
  {datap005R42h01T, datap005R42h05T, datap005R42h09T}, PlotRange → All, PlotStyle →
    {{Red, PointSize[0.02]}, {Black, PointSize[0.02]}, {Blue, PointSize[0.02]}}]

```

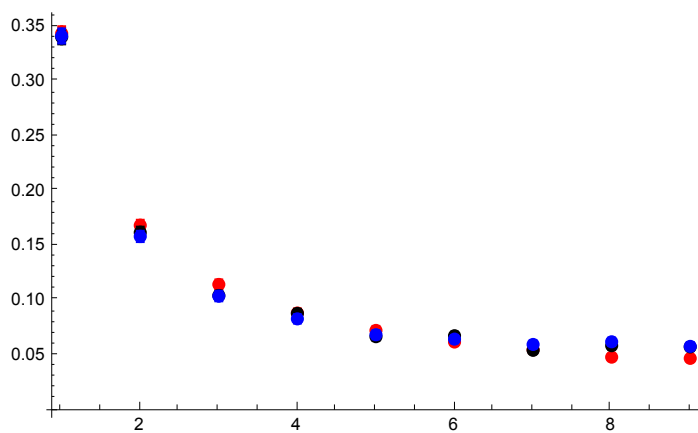

MSMS simulation results

```
p2AR42 = ErrorListPlot[{datp005R42h01MSMST,
  datp005R42h05MSMST, datp005R42h09MSMST}, PlotRange → All, PlotStyle →
  {{Pink, PointSize[0.02]}, {Gray, PointSize[0.02]}, {Cyan, PointSize[0.02]}}]
```

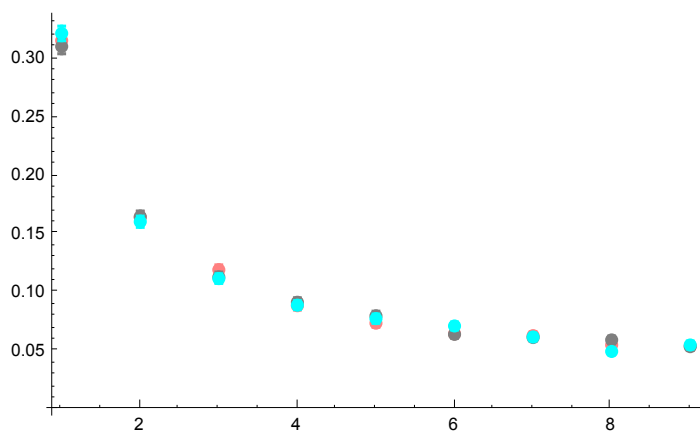

All together

```
p3R42 = Show[p1R42, p2R42, p2AR42, PlotRange → All]
```

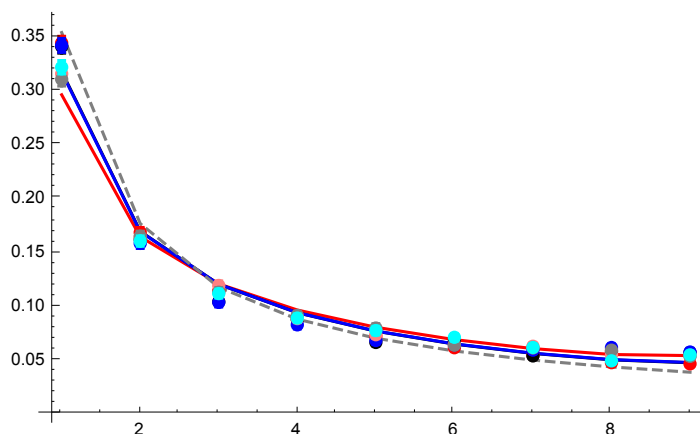

Simulation results only (SLiM and MSMS)

```
p3BR42 = Show[p2R42, p2AR42, PlotRange → All]
```

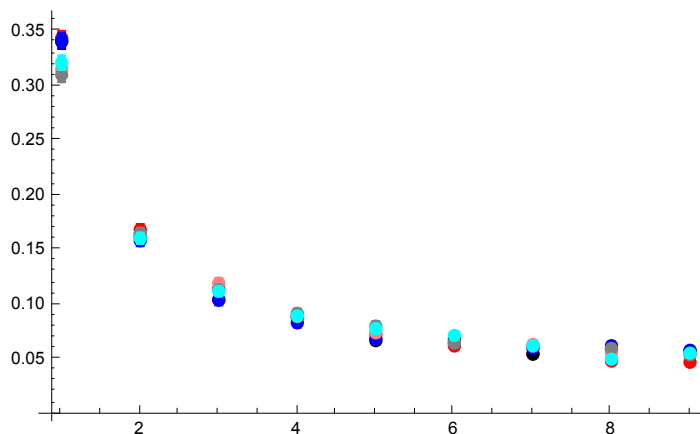

All plots compared

GraphicsGrid[{{p3R6s0p05, p3R18s0p05}, {p3R30, p3R42}}]

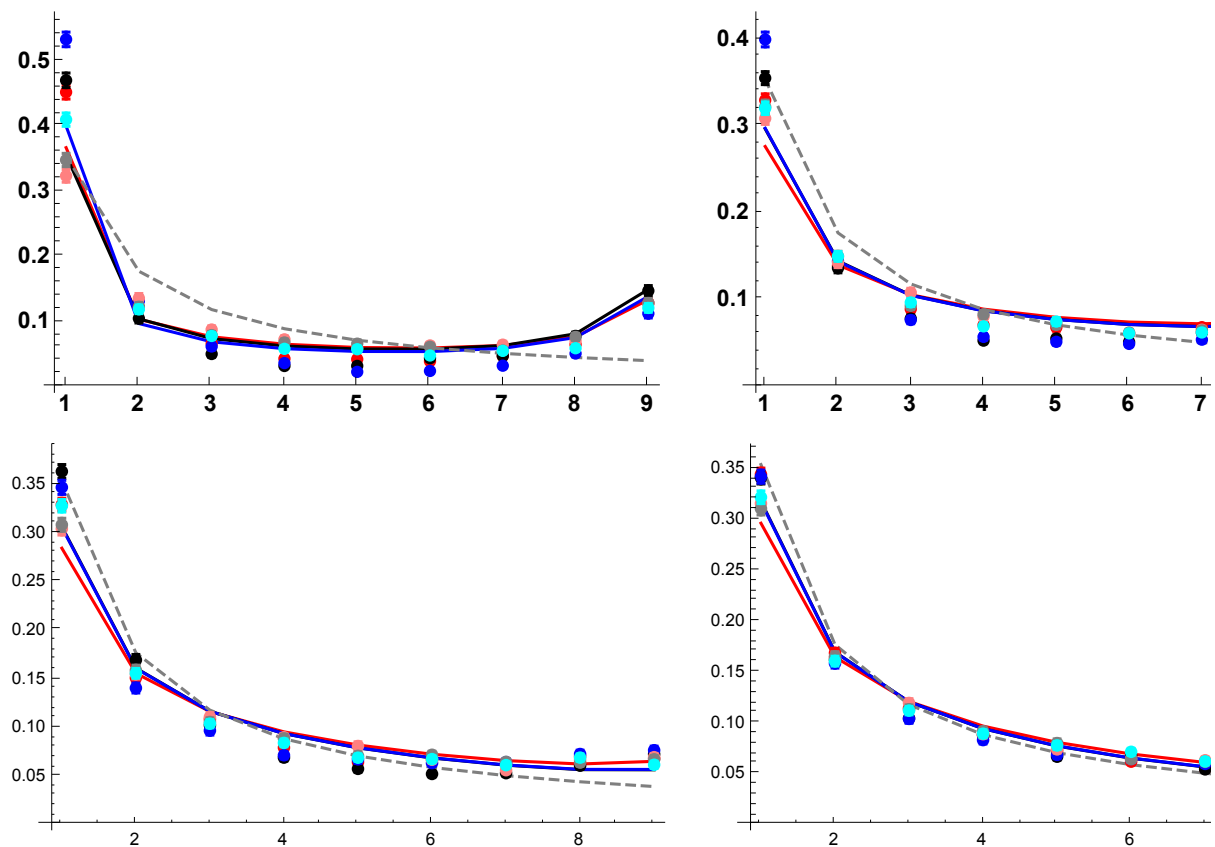

$\sigma = 1/2, F = 1/3$  case

Results with  $p_0 = 1/2N$

R = 11

```

datfDNR11h01s05 =
  Import["SLIM_SFS_F033/SFSTab_R_11_h_0.1_self_0.5_f_1e-04_10b_SLIM.dat",
    "Table"][[1]];
datfDNR11h01s05CI = Import[
  "SLIM_SFS_F033/SFSTab_R_11_h_0.1_self_0.5_f_1e-04_10b_SLIM.dat",
  "Table"][[2]];
datfDNR11h05s05 = Import[
  "SLIM_SFS_F033/SFSTab_R_11_h_0.5_self_0.5_f_1e-04_10b_SLIM.dat",
  "Table"][[1]];
datfDNR11h05s05CI = Import[
  "SLIM_SFS_F033/SFSTab_R_11_h_0.5_self_0.5_f_1e-04_10b_SLIM.dat",
  "Table"][[2]];
datfDNR11h09s05 = Import[
  "SLIM_SFS_F033/SFSTab_R_11_h_0.9_self_0.5_f_1e-04_10b_SLIM.dat",
  "Table"][[1]];
datfDNR11h09s05CI = Import[
  "SLIM_SFS_F033/SFSTab_R_11_h_0.9_self_0.5_f_1e-04_10b_SLIM.dat",
  "Table"][[2]];
datfDNR11h01s05T = Partition[Riffle[Partition[Riffle[Range[9], datfDNR11h01s05],
  2], Map[ErrorBar, datfDNR11h01s05CI]], 2];
datfDNR11h05s05T = Partition[Riffle[Partition[Riffle[Range[9], datfDNR11h05s05],
  2], Map[ErrorBar, datfDNR11h05s05CI]], 2];
datfDNR11h09s05T = Partition[Riffle[Partition[Riffle[Range[9], datfDNR11h09s05],
  2], Map[ErrorBar, datfDNR11h09s05CI]], 2];

```

```

p1R11s05 = ListPlot[
  {Table[{l, PLNH2[5000, 0.05, 0.1, 0.5, 11, 10, l, Boostp0[5000, 0.05, 0.1, 0.5],
     $\frac{4}{1 + \frac{0.5}{2-0.5}}$ }], {l, 1, 9}], Table[{l, PLNH2[5000, 0.05, 0.5, 0.5,
    11, 10, l, Boostp0[5000, 0.05, 0.5, 0.5],  $\frac{4}{1 + \frac{0.5}{2-0.5}}$ }], {l, 1, 9}],
  Table[{l, PLNH2[5000, 0.05, 0.9, 0.5, 11, 10, l, Boostp0[5000, 0.05, 0.9, 0.5],
     $\frac{4}{1 + \frac{0.5}{2-0.5}}$ }], {l, 1, 9}], Table[{l, PrJ[l, 10]}, {l, 1, 9}]}],
  PlotRange → All, PlotStyle → {Red, Black, Blue, {Gray, Dashed}},
  Joined → True, Ticks → {{1, 2, 3, 4, 5, 6, 7, 8, 9}, Automatic},
  BaseStyle → {FontWeight → "Bold", FontColor → Black, FontSize → 12}]

```

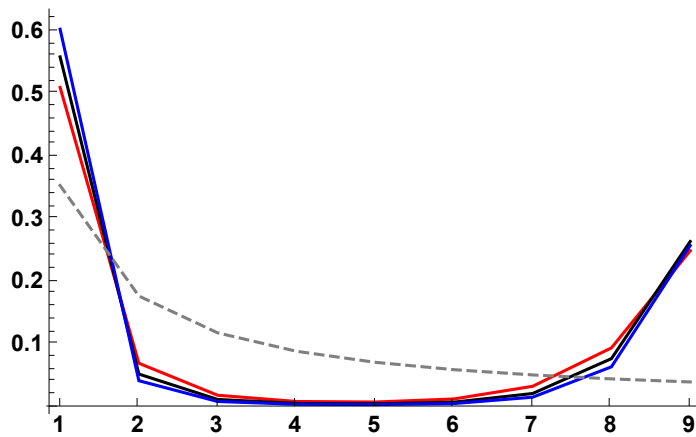

```

p2R11s05 = ErrorListPlot[{datfDNR11h01s05T, datfDNR11h05s05T, datfDNR11h09s05T},
  PlotRange → All, PlotStyle →
    {{Red, PointSize[0.02]}, {Black, PointSize[0.02]}, {Blue, PointSize[0.02]}}]

```

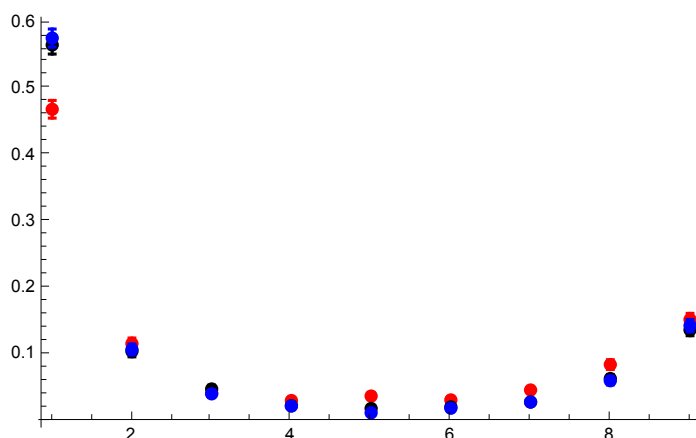

```
p3R11s05DN = Show[p1R11s05, p2R11s05, PlotRange → All, ImageSize → 325]
```

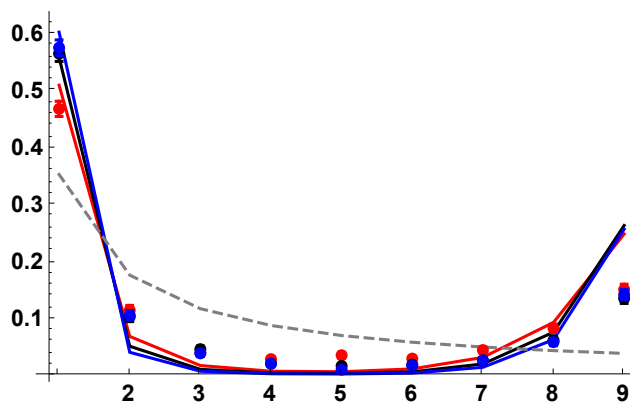

```
R = 33
```

```
datfDNR33h01s05 =
  Import["SLIM_SFS_F033/SFSTab_R_33_h_0.1_self_0.5_f_1e-04_10b_SLIM.dat",
    "Table"][[1]];
datfDNR33h01s05CI = Import[
  "SLIM_SFS_F033/SFSTab_R_33_h_0.1_self_0.5_f_1e-04_10b_SLIM.dat",
  "Table"][[2]];
datfDNR33h05s05 = Import[
  "SLIM_SFS_F033/SFSTab_R_33_h_0.5_self_0.5_f_1e-04_10b_SLIM.dat",
  "Table"][[1]];
datfDNR33h05s05CI = Import[
  "SLIM_SFS_F033/SFSTab_R_33_h_0.5_self_0.5_f_1e-04_10b_SLIM.dat",
  "Table"][[2]];
datfDNR33h09s05 = Import[
  "SLIM_SFS_F033/SFSTab_R_33_h_0.9_self_0.5_f_1e-04_10b_SLIM.dat",
  "Table"][[1]];
datfDNR33h09s05CI = Import[
  "SLIM_SFS_F033/SFSTab_R_33_h_0.9_self_0.5_f_1e-04_10b_SLIM.dat",
  "Table"][[2]];
datfDNR33h01s05T = Partition[Riffle[Partition[Riffle[Range[9], datfDNR33h01s05],
  2], Map[ErrorBar, datfDNR33h01s05CI]], 2];
datfDNR33h05s05T = Partition[Riffle[Partition[Riffle[Range[9], datfDNR33h05s05],
  2], Map[ErrorBar, datfDNR33h05s05CI]], 2];
datfDNR33h09s05T = Partition[Riffle[Partition[Riffle[Range[9], datfDNR33h09s05],
  2], Map[ErrorBar, datfDNR33h09s05CI]], 2];
```

```

p1R33s05 = ListPlot[
  {Table[{l, PLNH2[5000, 0.05, 0.1, 0.5, 33, 10, l, Boostp0[5000, 0.05, 0.1, 0.5],
     $\frac{4}{1 + \frac{0.5}{2-0.5}}$ }], {l, 1, 9}], Table[{l, PLNH2[5000, 0.05, 0.5, 0.5,
    33, 10, l, Boostp0[5000, 0.05, 0.5, 0.5],  $\frac{4}{1 + \frac{0.5}{2-0.5}}$ }], {l, 1, 9}],
  Table[{l, PLNH2[5000, 0.05, 0.9, 0.5, 33, 10, l, Boostp0[5000, 0.05, 0.9, 0.5],
     $\frac{4}{1 + \frac{0.5}{2-0.5}}$ }], {l, 1, 9}], Table[{l, PrJ[l, 10]}, {l, 1, 9}]}],
  PlotRange → All, PlotStyle → {Red, Black, Blue, {Gray, Dashed}},
  Joined → True]

```

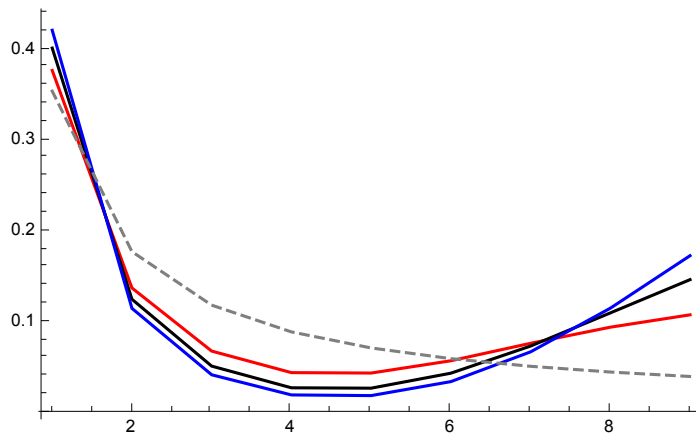

```

p2R33s05 = ErrorListPlot[{datfDNR33h01s05T, datfDNR33h05s05T, datfDNR33h09s05T},
  PlotRange → All, PlotStyle →
    {{Red, PointSize[0.02]}, {Black, PointSize[0.02]}, {Blue, PointSize[0.02]}}]

```

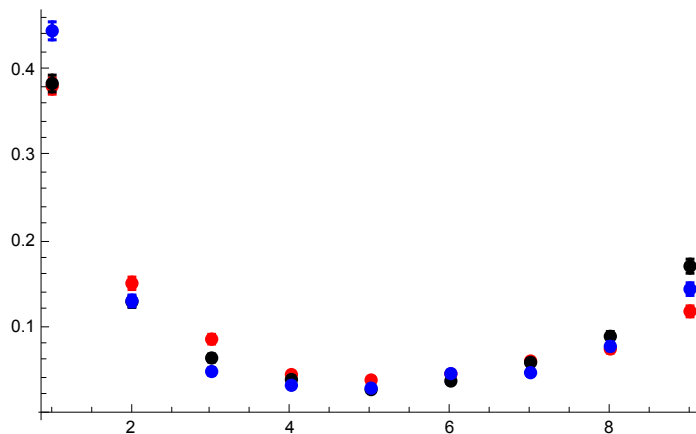



```
p3R33s05 = Show[p1R33s05, p2R33s05, PlotRange -> All]
```

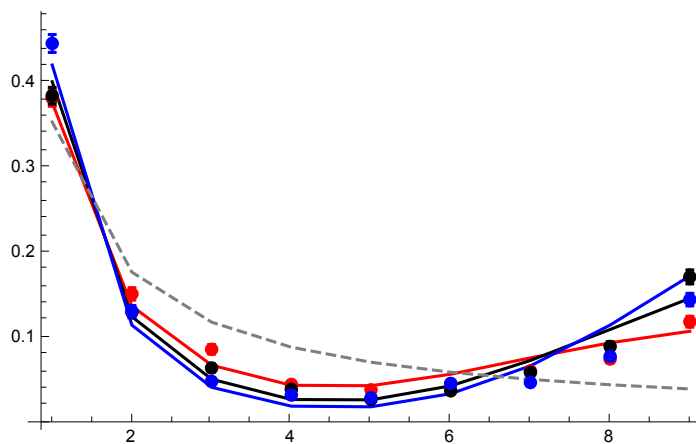

R = 55

```
datfDNR55h01s05 =
  Import["SLIM_SFS_F033/SFSTab_R_55_h_0.1_self_0.5_f_1e-04_10b_SLIM.dat",
    "Table"][[1]];
datfDNR55h01s05CI = Import[
  "SLIM_SFS_F033/SFSTab_R_55_h_0.1_self_0.5_f_1e-04_10b_SLIM.dat",
  "Table"][[2]];
datfDNR55h05s05 = Import[
  "SLIM_SFS_F033/SFSTab_R_55_h_0.5_self_0.5_f_1e-04_10b_SLIM.dat",
  "Table"][[1]];
datfDNR55h05s05CI = Import[
  "SLIM_SFS_F033/SFSTab_R_55_h_0.5_self_0.5_f_1e-04_10b_SLIM.dat",
  "Table"][[2]];
datfDNR55h09s05 = Import[
  "SLIM_SFS_F033/SFSTab_R_55_h_0.9_self_0.5_f_1e-04_10b_SLIM.dat",
  "Table"][[1]];
datfDNR55h09s05CI = Import[
  "SLIM_SFS_F033/SFSTab_R_55_h_0.9_self_0.5_f_1e-04_10b_SLIM.dat",
  "Table"][[2]];
datfDNR55h01s05T = Partition[Riffle[Partition[Riffle[Range[9], datfDNR55h01s05],
  2], Map[ErrorBar, datfDNR55h01s05CI]], 2];
datfDNR55h05s05T = Partition[Riffle[Partition[Riffle[Range[9], datfDNR55h05s05],
  2], Map[ErrorBar, datfDNR55h05s05CI]], 2];
datfDNR55h09s05T = Partition[Riffle[Partition[Riffle[Range[9], datfDNR55h09s05],
  2], Map[ErrorBar, datfDNR55h09s05CI]], 2];
```

```

p1R55s05 = ListPlot[
  {Table[{l, PLNH2[5000, 0.05, 0.1, 0.5, 55, 10, l, Boostp0[5000, 0.05, 0.1, 0.5],
     $\frac{4}{1 + \frac{0.5}{2-0.5}}$ }], {l, 1, 9}], Table[{l, PLNH2[5000, 0.05, 0.5, 0.5,
    55, 10, l, Boostp0[5000, 0.05, 0.5, 0.5],  $\frac{4}{1 + \frac{0.5}{2-0.5}}$ }], {l, 1, 9}],
  Table[{l, PLNH2[5000, 0.05, 0.9, 0.5, 55, 10, l, Boostp0[5000, 0.05, 0.9, 0.5],
     $\frac{4}{1 + \frac{0.5}{2-0.5}}$ }], {l, 1, 9}], Table[{l, PrJ[l, 10]}], {l, 1, 9}]],
  PlotRange → All, PlotStyle → {Red, Black, Blue, {Gray, Dashed}},
  Joined → True]

```

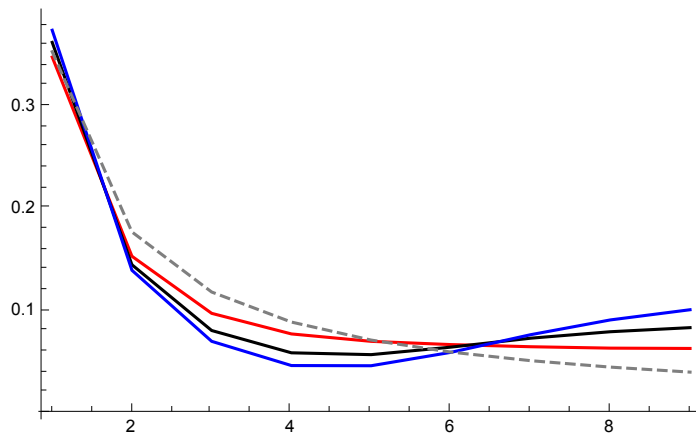

```

p2R55s05 = ErrorListPlot[{datfDNR55h01s05T, datfDNR55h05s05T, datfDNR55h09s05T},
  PlotRange → All, PlotStyle →
    {{Red, PointSize[0.02]}, {Black, PointSize[0.02]}, {Blue, PointSize[0.02]}}]

```

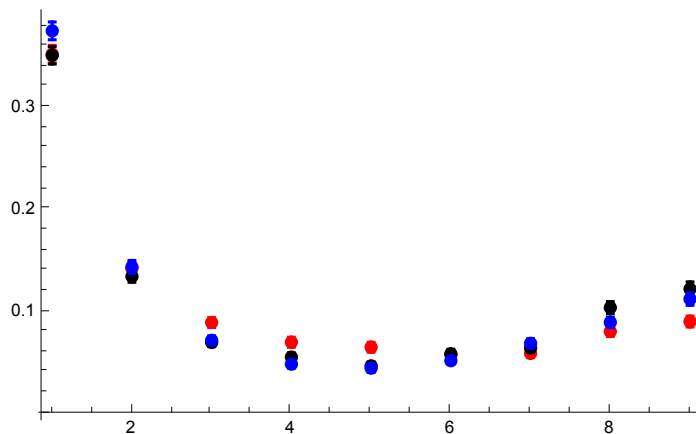

p3R55s05 = Show[p1R55s05, p2R55s05, PlotRange -> All]

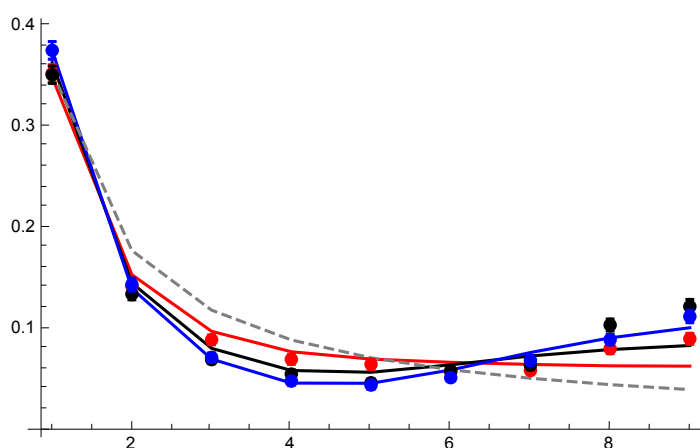

All plots compared

GraphicsGrid[{{p3R11s05DN, p3R33s05}, {p3R55s05,}}]

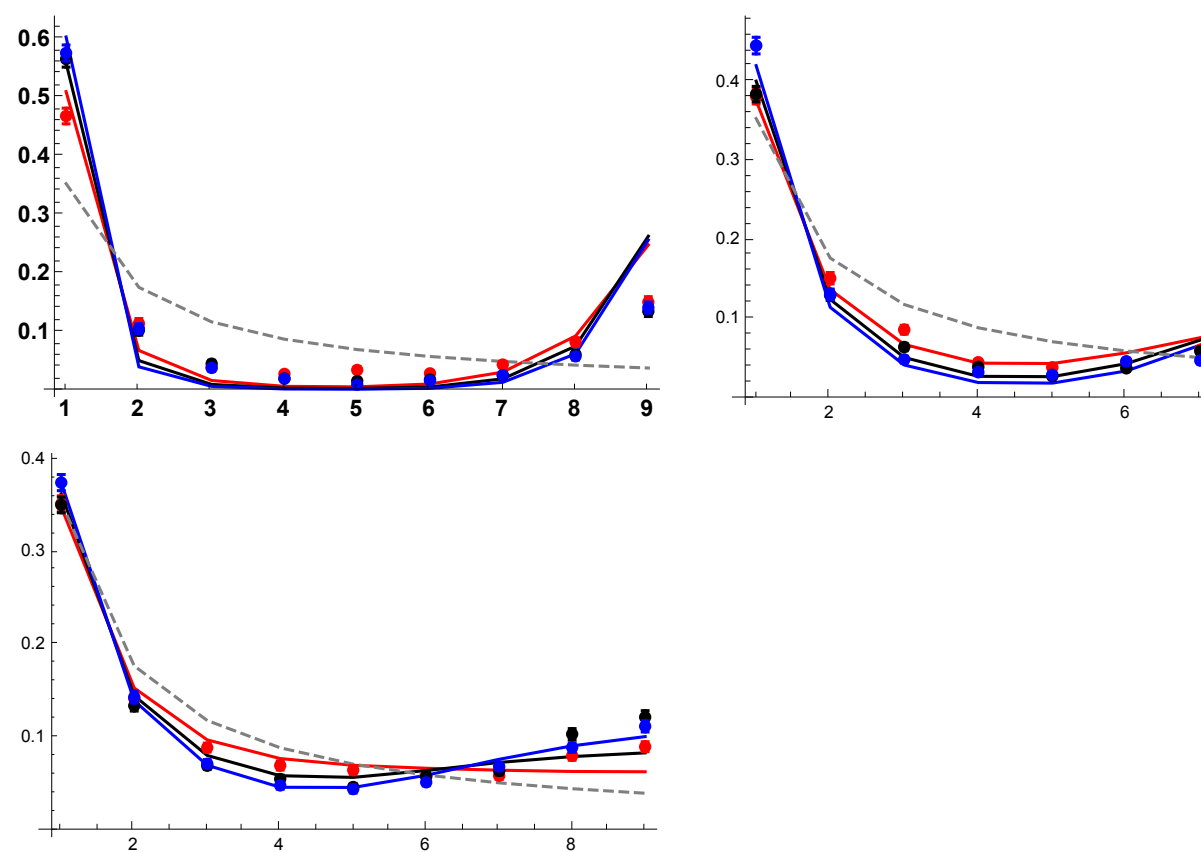

Results with  $p_0 = 0.02$

R = 11

```

datp002R11h01s05 =
  Import["SLIM_SFS_F033/SFSTab_R_11_h_0.1_self_0.5_f_0.02_10b_SLIM.dat",
    "Table"][[1]];
datp002R11h01s05CI = Import[
  "SLIM_SFS_F033/SFSTab_R_11_h_0.1_self_0.5_f_0.02_10b_SLIM.dat",
  "Table"][[2]];
datp002R11h05s05 = Import[
  "SLIM_SFS_F033/SFSTab_R_11_h_0.5_self_0.5_f_0.02_10b_SLIM.dat",
  "Table"][[1]];
datp002R11h05s05CI = Import[
  "SLIM_SFS_F033/SFSTab_R_11_h_0.5_self_0.5_f_0.02_10b_SLIM.dat",
  "Table"][[2]];
datp002R11h09s05 = Import[
  "SLIM_SFS_F033/SFSTab_R_11_h_0.9_self_0.5_f_0.02_10b_SLIM.dat",
  "Table"][[1]];
datp002R11h09s05CI = Import[
  "SLIM_SFS_F033/SFSTab_R_11_h_0.9_self_0.5_f_0.02_10b_SLIM.dat",
  "Table"][[2]];
datp002R11h01s05T = Partition[Riffle[Partition[Riffle[Range[9],
  datp002R11h01s05], 2], Map[ErrorBar, datp002R11h01s05CI]], 2];
datp002R11h05s05T = Partition[Riffle[Partition[Riffle[Range[9],
  datp002R11h05s05], 2], Map[ErrorBar, datp002R11h05s05CI]], 2];
datp002R11h09s05T = Partition[Riffle[Partition[Riffle[Range[9],
  datp002R11h09s05], 2], Map[ErrorBar, datp002R11h09s05CI]], 2];

```

```

p1R11s05 = ListPlot[
  {Table[{l, PLNH2[5000, 0.05, 0.1, 0.5, 11, 10, l, 0.02,  $\frac{4}{1 + \frac{0.5}{2-0.5}}$ ]}, {l, 1, 9}],
    Table[{l, PLNH2[5000, 0.05, 0.5, 0.5, 11, 10, l, 0.02,  $\frac{4}{1 + \frac{0.5}{2-0.5}}$ ]}, {l, 1, 9}],
    Table[{l, PLNH2[5000, 0.05, 0.9, 0.5, 11, 10, l, 0.02,  $\frac{4}{1 + \frac{0.5}{2-0.5}}$ ]}, {l, 1, 9}],
    Table[{l, PrJ[l, 10]}, {l, 1, 9}], PlotRange → All,
  PlotStyle → {Red, Black, Blue, {Gray, Dashed}}, Joined → True,
  Ticks → {{1, 2, 3, 4, 5, 6, 7, 8, 9}, Automatic},
  BaseStyle → {FontWeight → "Bold", FontColor → Black, FontSize → 12}]

```

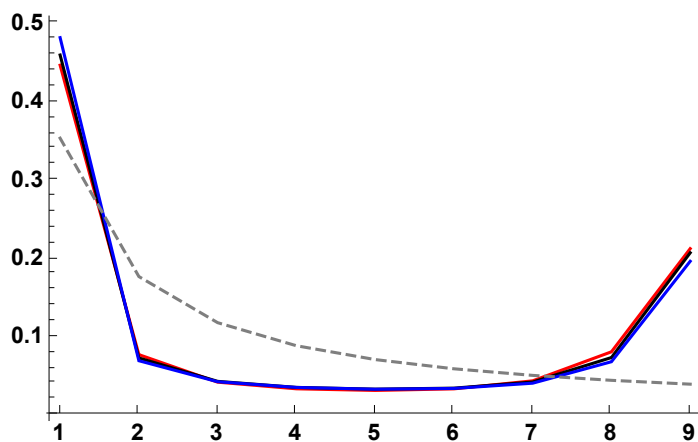

```

p2R11s05 = ErrorListPlot[{datp002R11h01s05T,
  datp002R11h05s05T, datp002R11h09s05T}, PlotRange → All, PlotStyle →
  {{Red, PointSize[0.02]}, {Black, PointSize[0.02]}, {Blue, PointSize[0.02]}}]

```

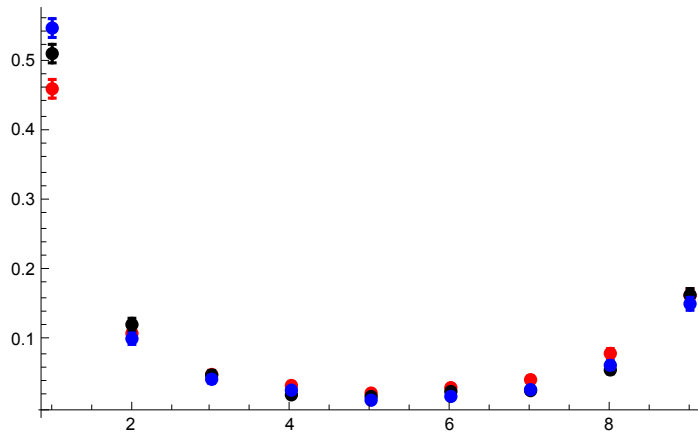

```
p3R11s05p02 = Show[p1R11s05, p2R11s05, PlotRange → All, ImageSize → 325]
```

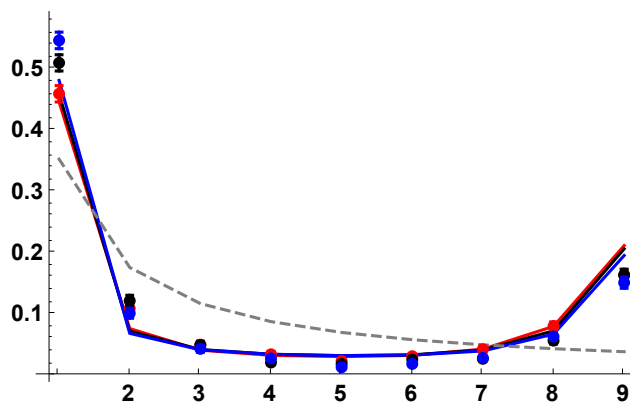

```
R = 33
```

```
datp002R33h01s05 =
  Import["SLIM_SFS_F033/SFSTab_R_33_h_0.1_self_0.5_f_0.02_10b_SLIM.dat",
    "Table"][[1]];
datp002R33h01s05CI = Import[
  "SLIM_SFS_F033/SFSTab_R_33_h_0.1_self_0.5_f_0.02_10b_SLIM.dat",
  "Table"][[2]];
datp002R33h05s05 = Import[
  "SLIM_SFS_F033/SFSTab_R_33_h_0.5_self_0.5_f_0.02_10b_SLIM.dat",
  "Table"][[1]];
datp002R33h05s05CI = Import[
  "SLIM_SFS_F033/SFSTab_R_33_h_0.5_self_0.5_f_0.02_10b_SLIM.dat",
  "Table"][[2]];
datp002R33h09s05 = Import[
  "SLIM_SFS_F033/SFSTab_R_33_h_0.9_self_0.5_f_0.02_10b_SLIM.dat",
  "Table"][[1]];
datp002R33h09s05CI = Import[
  "SLIM_SFS_F033/SFSTab_R_33_h_0.9_self_0.5_f_0.02_10b_SLIM.dat",
  "Table"][[2]];
datp002R33h01s05T = Partition[Riffle[Partition[Riffle[Range[9],
  datp002R33h01s05], 2], Map[ErrorBar, datp002R33h01s05CI]], 2];
datp002R33h05s05T = Partition[Riffle[Partition[Riffle[Range[9],
  datp002R33h05s05], 2], Map[ErrorBar, datp002R33h05s05CI]], 2];
datp002R33h09s05T = Partition[Riffle[Partition[Riffle[Range[9],
  datp002R33h09s05], 2], Map[ErrorBar, datp002R33h09s05CI]], 2];
```

```

p1R33s05 = ListPlot[
  {Table[{l, PLNH2[5000, 0.05, 0.1, 0.5, 33, 10, l, 0.02,  $\frac{4}{1 + \frac{0.5}{2-0.5}}$ ]}, {l, 1, 9}],
    Table[{l, PLNH2[5000, 0.05, 0.5, 0.5, 33, 10, l, 0.02,  $\frac{4}{1 + \frac{0.5}{2-0.5}}$ ]}, {l, 1, 9}],
    Table[{l, PLNH2[5000, 0.05, 0.9, 0.5, 33, 10, l, 0.02,  $\frac{4}{1 + \frac{0.5}{2-0.5}}$ ]}, {l, 1, 9}],
    Table[{l, PrJ[l, 10]}, {l, 1, 9}]}, PlotRange → All,
  PlotStyle → {Red, Black, Blue, {Gray, Dashed}}, Joined → True]

```

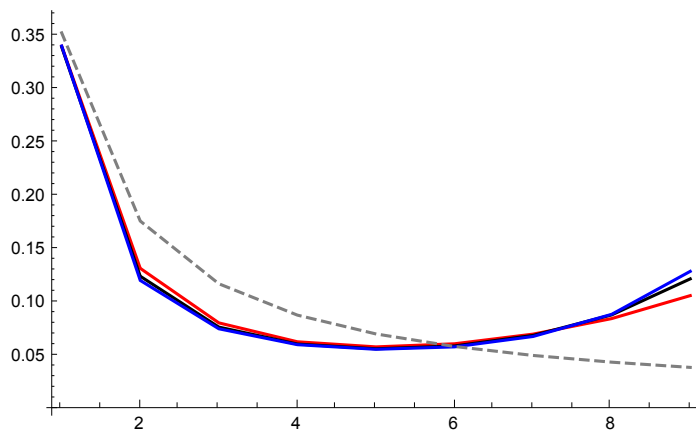

```

p2R33s05 = ErrorListPlot[{datp002R33h01s05T,
  datp002R33h05s05T, datp002R33h09s05T}, PlotRange → All, PlotStyle →
  {{Red, PointSize[0.02]}, {Black, PointSize[0.02]}, {Blue, PointSize[0.02]}}]

```

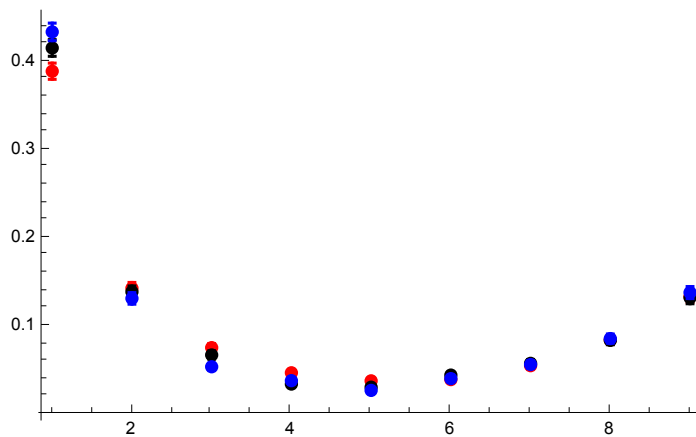

```
p3R33s05 = Show[p1R33s05, p2R33s05, PlotRange -> All]
```

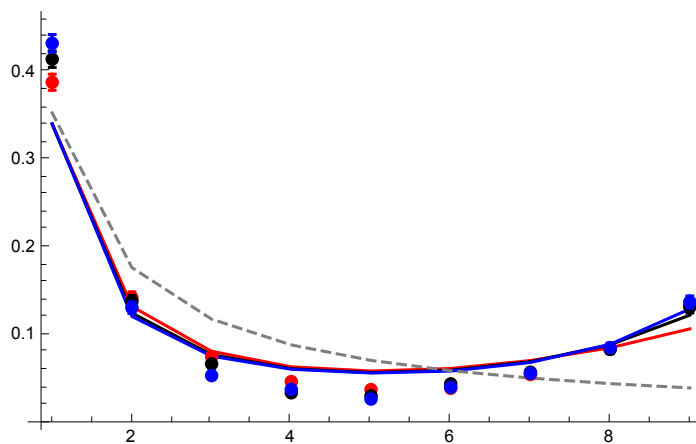

```
R = 55
```

```
datp002R55h01s05 =
  Import["SLIM_SFS_F033/SFSTab_R_55_h_0.1_self_0.5_f_0.02_10b_SLIM.dat",
    "Table"][[1]];
datp002R55h01s05CI = Import[
  "SLIM_SFS_F033/SFSTab_R_55_h_0.1_self_0.5_f_0.02_10b_SLIM.dat",
  "Table"][[2]];
datp002R55h05s05 = Import[
  "SLIM_SFS_F033/SFSTab_R_55_h_0.5_self_0.5_f_0.02_10b_SLIM.dat",
  "Table"][[1]];
datp002R55h05s05CI = Import[
  "SLIM_SFS_F033/SFSTab_R_55_h_0.5_self_0.5_f_0.02_10b_SLIM.dat",
  "Table"][[2]];
datp002R55h09s05 = Import[
  "SLIM_SFS_F033/SFSTab_R_55_h_0.9_self_0.5_f_0.02_10b_SLIM.dat",
  "Table"][[1]];
datp002R55h09s05CI = Import[
  "SLIM_SFS_F033/SFSTab_R_55_h_0.9_self_0.5_f_0.02_10b_SLIM.dat",
  "Table"][[2]];
datp002R55h01s05T = Partition[Riffle[Partition[Riffle[Range[9],
  datp002R55h01s05], 2], Map[ErrorBar, datp002R55h01s05CI]], 2];
datp002R55h05s05T = Partition[Riffle[Partition[Riffle[Range[9],
  datp002R55h05s05], 2], Map[ErrorBar, datp002R55h05s05CI]], 2];
datp002R55h09s05T = Partition[Riffle[Partition[Riffle[Range[9],
  datp002R55h09s05], 2], Map[ErrorBar, datp002R55h09s05CI]], 2];
```



```

p1R55s05 = ListPlot[
  {Table[{l, PLNH2[5000, 0.05, 0.1, 0.5, 55, 10, l, 0.02,  $\frac{4}{1 + \frac{0.5}{2-0.5}}$ ]}, {l, 1, 9}],
    Table[{l, PLNH2[5000, 0.05, 0.5, 0.5, 55, 10, l, 0.02,  $\frac{4}{1 + \frac{0.5}{2-0.5}}$ ]}, {l, 1, 9}],
    Table[{l, PLNH2[5000, 0.05, 0.9, 0.5, 55, 10, l, 0.02,  $\frac{4}{1 + \frac{0.5}{2-0.5}}$ ]}, {l, 1, 9}],
    Table[{l, PrJ[l, 10]}, {l, 1, 9}]}, PlotRange → All,
  PlotStyle → {Red, Black, Blue, {Gray, Dashed}}, Joined → True]

```

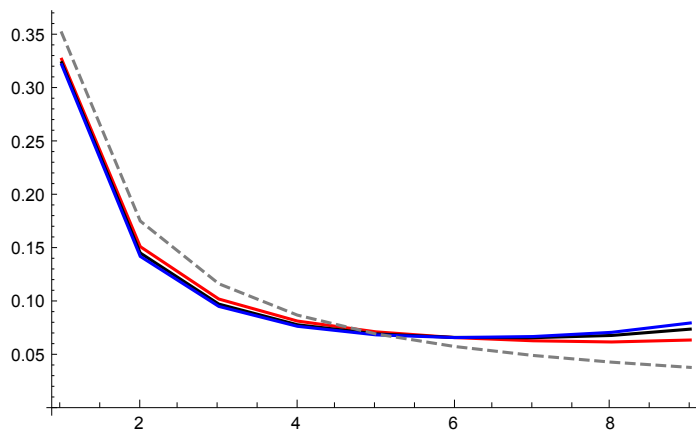

```

p2R55s05 = ErrorListPlot[{datp002R55h01s05T,
  datp002R55h05s05T, datp002R55h09s05T}, PlotRange → All, PlotStyle →
  {{Red, PointSize[0.02]}, {Black, PointSize[0.02]}, {Blue, PointSize[0.02]}}]

```

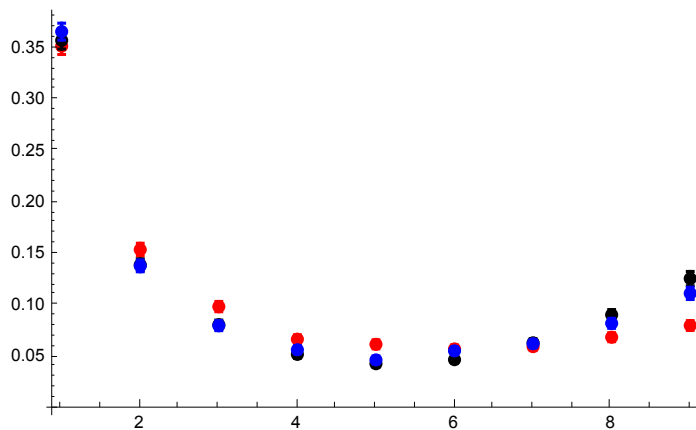

```
p3R55s05 = Show[p1R55s05, p2R55s05, PlotRange -> All]
```

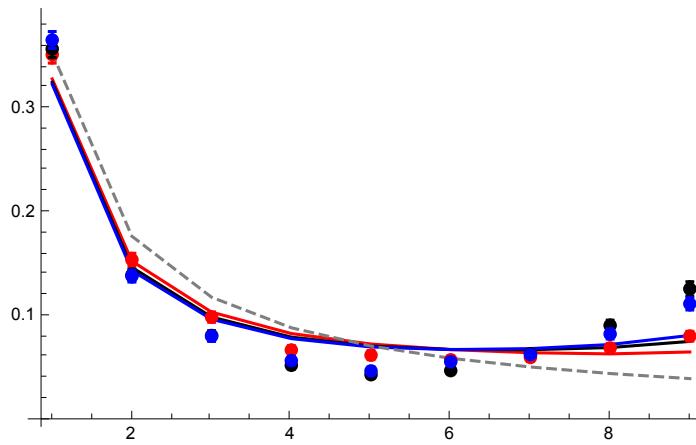

All plots compared

```
GraphicsGrid[{{p3R11s05p02, p3R33s05}, {p3R55s05,}}]
```

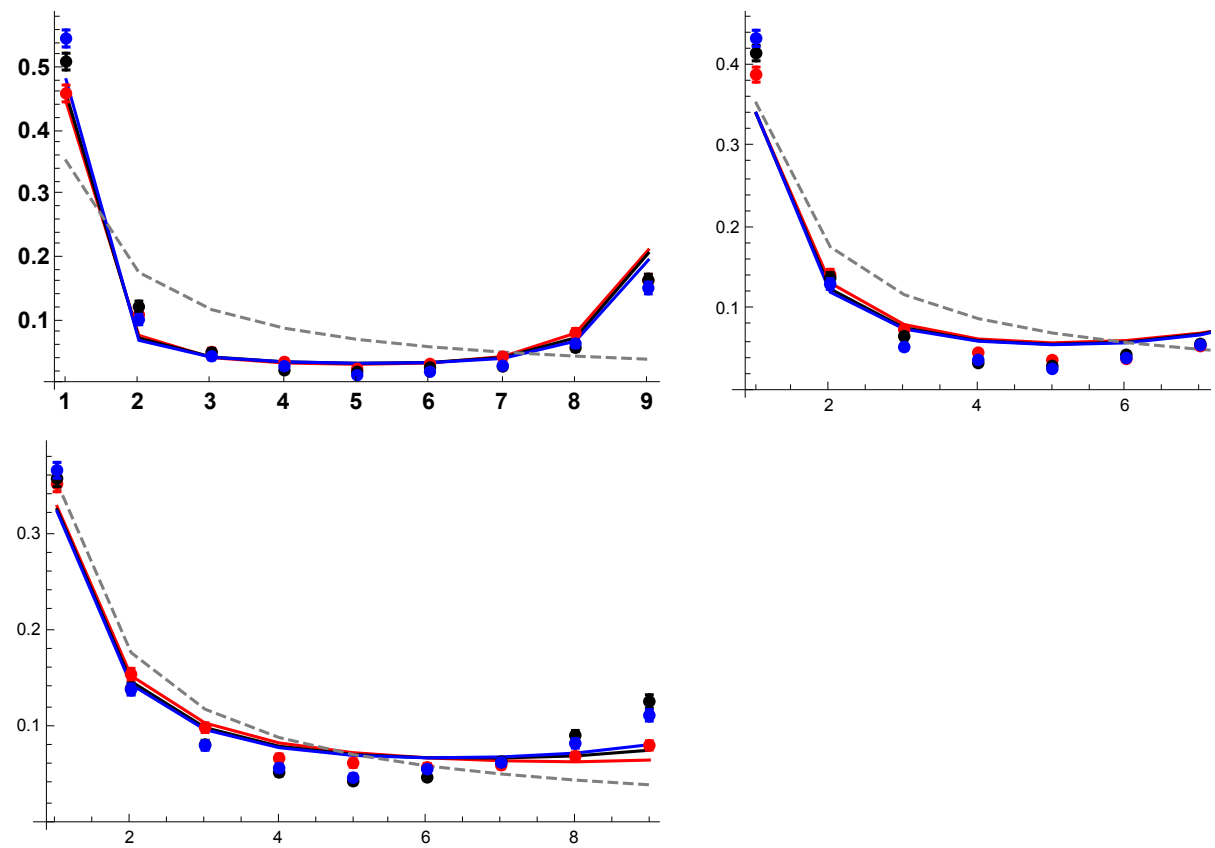

Results with  $p_0 = 0.05$

R = 11

```

datp005R11h01s05 =
  Import["SLIM_SFS_F033/SFSTab_R_11_h_0.1_self_0.5_f_0.05_10b_SLIM.dat",
    "Table"][[1]];
datp005R11h01s05CI = Import[
  "SLIM_SFS_F033/SFSTab_R_11_h_0.1_self_0.5_f_0.05_10b_SLIM.dat",
  "Table"][[2]];
datp005R11h05s05 = Import[
  "SLIM_SFS_F033/SFSTab_R_11_h_0.5_self_0.5_f_0.05_10b_SLIM.dat",
  "Table"][[1]];
datp005R11h05s05CI = Import[
  "SLIM_SFS_F033/SFSTab_R_11_h_0.5_self_0.5_f_0.05_10b_SLIM.dat",
  "Table"][[2]];
datp005R11h09s05 = Import[
  "SLIM_SFS_F033/SFSTab_R_11_h_0.9_self_0.5_f_0.05_10b_SLIM.dat",
  "Table"][[1]];
datp005R11h09s05CI = Import[
  "SLIM_SFS_F033/SFSTab_R_11_h_0.9_self_0.5_f_0.05_10b_SLIM.dat",
  "Table"][[2]];
datp005R11h01s05T = Partition[Riffle[Partition[Riffle[Range[9],
  datp005R11h01s05], 2], Map[ErrorBar, datp005R11h01s05CI]], 2];
datp005R11h05s05T = Partition[Riffle[Partition[Riffle[Range[9],
  datp005R11h05s05], 2], Map[ErrorBar, datp005R11h05s05CI]], 2];
datp005R11h09s05T = Partition[Riffle[Partition[Riffle[Range[9],
  datp005R11h09s05], 2], Map[ErrorBar, datp005R11h09s05CI]], 2];

```

```

p1R11s05 = ListPlot[
  {Table[{l, PLNH2[5000, 0.05, 0.1, 0.5, 11, 10, l, 0.05,  $\frac{4}{1 + \frac{0.5}{2-0.5}}$ ]}], {l, 1, 9}},
  Table[{l, PLNH2[5000, 0.05, 0.5, 0.5, 11, 10, l, 0.05,  $\frac{4}{1 + \frac{0.5}{2-0.5}}$ ]}], {l, 1, 9}},
  Table[{l, PLNH2[5000, 0.05, 0.9, 0.5, 11, 10, l, 0.05,  $\frac{4}{1 + \frac{0.5}{2-0.5}}$ ]}], {l, 1, 9}},
  Table[{l, PrJ[l, 10]}], {l, 1, 9}], PlotRange → All,
  PlotStyle → {Red, Black, Blue, {Gray, Dashed}}, Joined → True,
  Ticks → {{1, 2, 3, 4, 5, 6, 7, 8, 9}, Automatic},
  BaseStyle → {FontWeight → "Bold", FontColor → Black, FontSize → 12}]

```

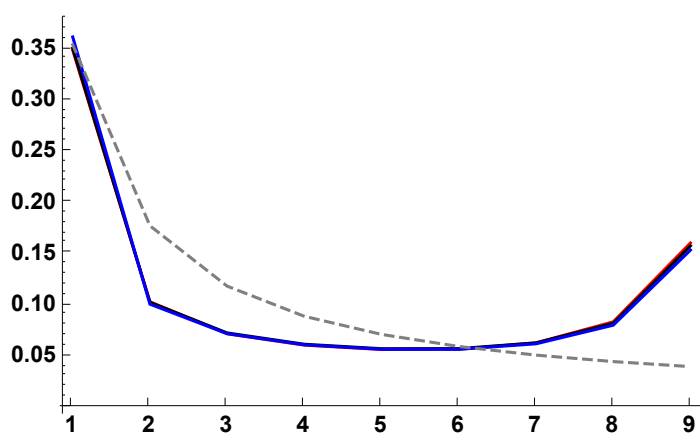

```

p2R11s05 = ErrorListPlot[{datp005R11h01s05T,
  datp005R11h05s05T, datp005R11h09s05T}, PlotRange → All, PlotStyle →
  {{Red, PointSize[0.02]}, {Black, PointSize[0.02]}, {Blue, PointSize[0.02]}}]

```

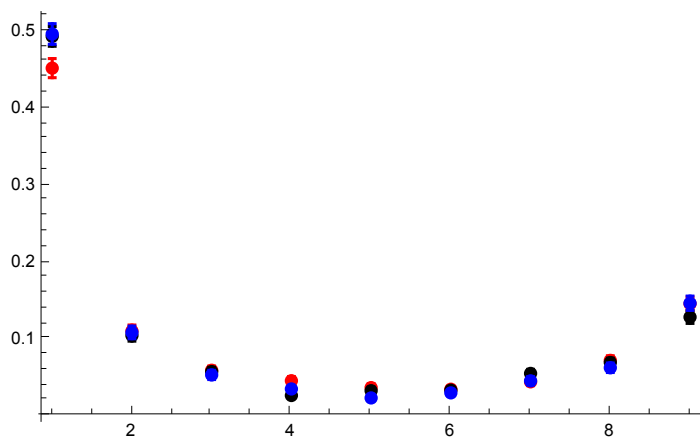

```
p3R11s05p05 = Show[p1R11s05, p2R11s05, PlotRange → All, ImageSize → 325]
```

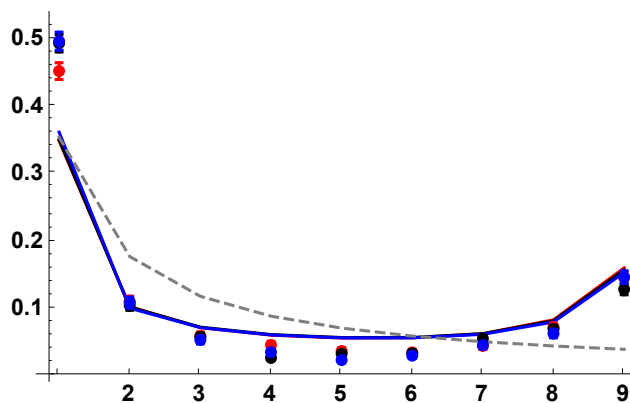

```
R = 33
```

```
datp005R33h01s05 =
  Import["SLIM_SFS_F033/SFSTab_R_33_h_0.1_self_0.5_f_0.05_10b_SLIM.dat",
    "Table"][[1]];
datp005R33h01s05CI = Import[
  "SLIM_SFS_F033/SFSTab_R_33_h_0.1_self_0.5_f_0.05_10b_SLIM.dat",
  "Table"][[2]];
datp005R33h05s05 = Import[
  "SLIM_SFS_F033/SFSTab_R_33_h_0.5_self_0.5_f_0.05_10b_SLIM.dat",
  "Table"][[1]];
datp005R33h05s05CI = Import[
  "SLIM_SFS_F033/SFSTab_R_33_h_0.5_self_0.5_f_0.05_10b_SLIM.dat",
  "Table"][[2]];
datp005R33h09s05 = Import[
  "SLIM_SFS_F033/SFSTab_R_33_h_0.9_self_0.5_f_0.05_10b_SLIM.dat",
  "Table"][[1]];
datp005R33h09s05CI = Import[
  "SLIM_SFS_F033/SFSTab_R_33_h_0.9_self_0.5_f_0.05_10b_SLIM.dat",
  "Table"][[2]];
datp005R33h01s05T = Partition[Riffle[Partition[Riffle[Range[9],
  datp005R33h01s05], 2], Map[ErrorBar, datp005R33h01s05CI]], 2];
datp005R33h05s05T = Partition[Riffle[Partition[Riffle[Range[9],
  datp005R33h05s05], 2], Map[ErrorBar, datp005R33h05s05CI]], 2];
datp005R33h09s05T = Partition[Riffle[Partition[Riffle[Range[9],
  datp005R33h09s05], 2], Map[ErrorBar, datp005R33h09s05CI]], 2];
```

```

p1R33s05 = ListPlot[
  {Table[{l, PLNH2[5000, 0.05, 0.1, 0.5, 33, 10, l, 0.05,  $\frac{4}{1 + \frac{0.5}{2-0.5}}$ ]}], {l, 1, 9}},
  Table[{l, PLNH2[5000, 0.05, 0.5, 0.5, 33, 10, l, 0.05,  $\frac{4}{1 + \frac{0.5}{2-0.5}}$ ]}], {l, 1, 9}},
  Table[{l, PLNH2[5000, 0.05, 0.9, 0.5, 33, 10, l, 0.05,  $\frac{4}{1 + \frac{0.5}{2-0.5}}$ ]}], {l, 1, 9}},
  Table[{l, PrJ[l, 10]}], {l, 1, 9}], PlotRange → All,
  PlotStyle → {Red, Black, Blue, {Gray, Dashed}}, Joined → True]

```

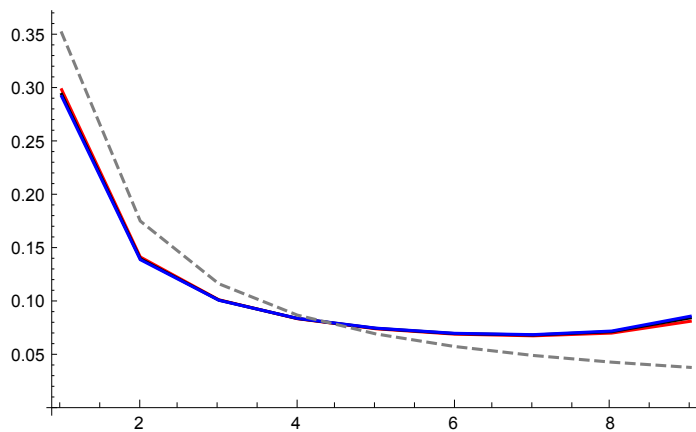

```

p2R33s05 = ErrorListPlot[{datp005R33h01s05T,
  datp005R33h05s05T, datp005R33h09s05T}, PlotRange → All, PlotStyle →
  {{Red, PointSize[0.02]}, {Black, PointSize[0.02]}, {Blue, PointSize[0.02]}}]

```

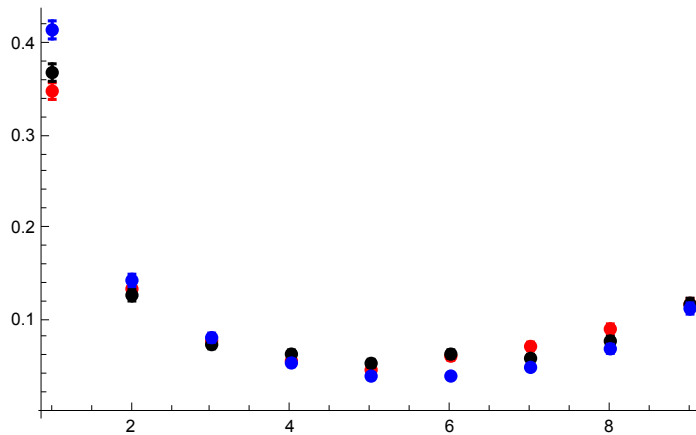

```
p3R33s05 = Show[p1R33s05, p2R33s05, PlotRange -> All]
```

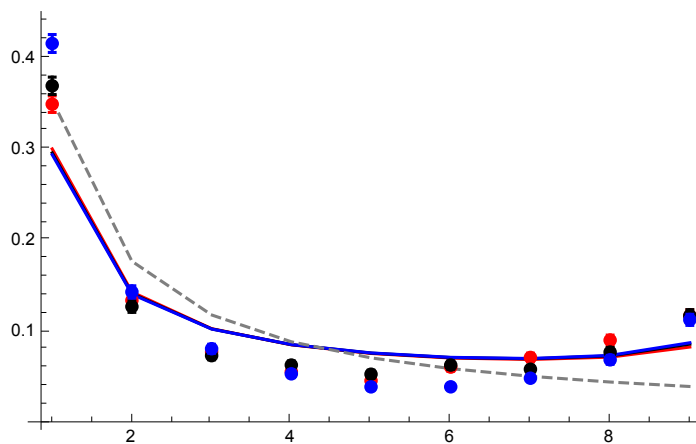

```
R = 55
```

```
datp005R55h01s05 =
  Import["SLIM_SFS_F033/SFSTab_R_55_h_0.1_self_0.5_f_0.05_10b_SLIM.dat",
    "Table"][[1]];
datp005R55h01s05CI = Import[
  "SLIM_SFS_F033/SFSTab_R_55_h_0.1_self_0.5_f_0.05_10b_SLIM.dat",
  "Table"][[2]];
datp005R55h05s05 = Import[
  "SLIM_SFS_F033/SFSTab_R_55_h_0.5_self_0.5_f_0.05_10b_SLIM.dat",
  "Table"][[1]];
datp005R55h05s05CI = Import[
  "SLIM_SFS_F033/SFSTab_R_55_h_0.5_self_0.5_f_0.05_10b_SLIM.dat",
  "Table"][[2]];
datp005R55h09s05 = Import[
  "SLIM_SFS_F033/SFSTab_R_55_h_0.9_self_0.5_f_0.05_10b_SLIM.dat",
  "Table"][[1]];
datp005R55h09s05CI = Import[
  "SLIM_SFS_F033/SFSTab_R_55_h_0.9_self_0.5_f_0.05_10b_SLIM.dat",
  "Table"][[2]];
datp005R55h01s05T = Partition[Riffle[Partition[Riffle[Range[9],
  datp005R55h01s05], 2], Map[ErrorBar, datp005R55h01s05CI]], 2];
datp005R55h05s05T = Partition[Riffle[Partition[Riffle[Range[9],
  datp005R55h05s05], 2], Map[ErrorBar, datp005R55h05s05CI]], 2];
datp005R55h09s05T = Partition[Riffle[Partition[Riffle[Range[9],
  datp005R55h09s05], 2], Map[ErrorBar, datp005R55h09s05CI]], 2];
```

```

p1R55s05 = ListPlot[
  {Table[{l, PLNH2[5000, 0.05, 0.1, 0.5, 55, 10, l, 0.05,  $\frac{4}{1 + \frac{0.5}{2-0.5}}$ ]}], {l, 1, 9}},
  Table[{l, PLNH2[5000, 0.05, 0.5, 0.5, 55, 10, l, 0.05,  $\frac{4}{1 + \frac{0.5}{2-0.5}}$ ]}], {l, 1, 9}},
  Table[{l, PLNH2[5000, 0.05, 0.9, 0.5, 55, 10, l, 0.05,  $\frac{4}{1 + \frac{0.5}{2-0.5}}$ ]}], {l, 1, 9}},
  Table[{l, PrJ[l, 10]}], {l, 1, 9}], PlotRange → All,
  PlotStyle → {Red, Black, Blue, {Gray, Dashed}}, Joined → True]

```

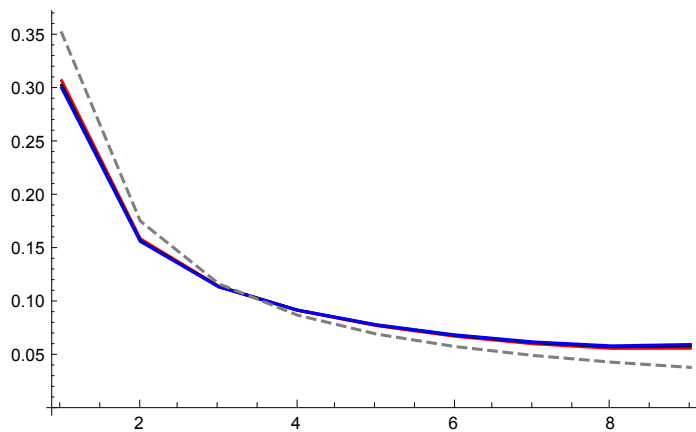

```

p2R55s05 = ErrorListPlot[{datp005R55h01s05T,
  datp005R55h05s05T, datp005R55h09s05T}, PlotRange → All, PlotStyle →
  {{Red, PointSize[0.02]}, {Black, PointSize[0.02]}, {Blue, PointSize[0.02]}}]

```

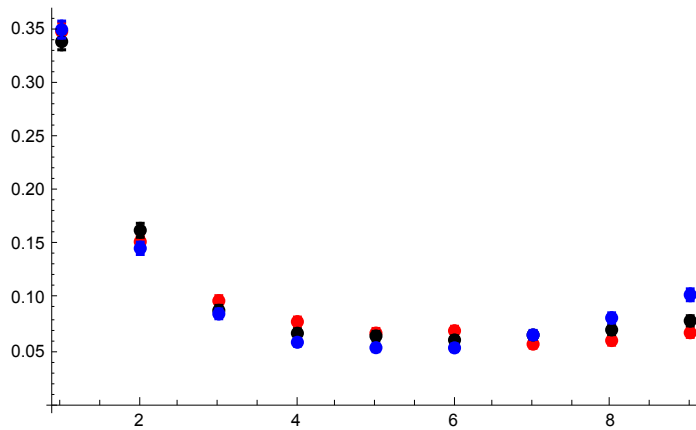



p3R55s05 = Show[p1R55s05, p2R55s05, PlotRange -> All]

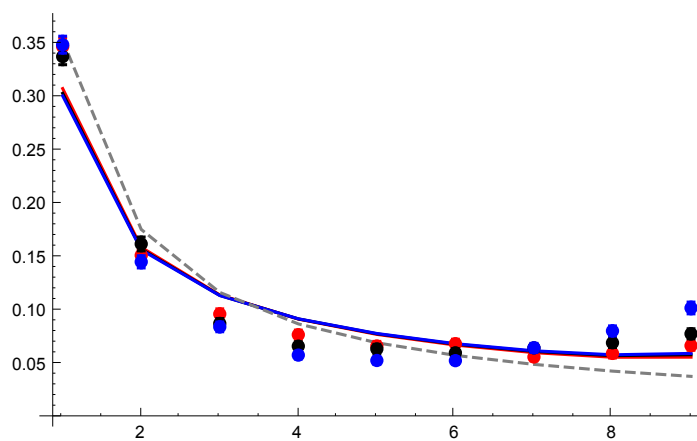

All plots compared

GraphicsGrid[{{p3R11s05p05, p3R33s05}, {p3R55s05,}}]

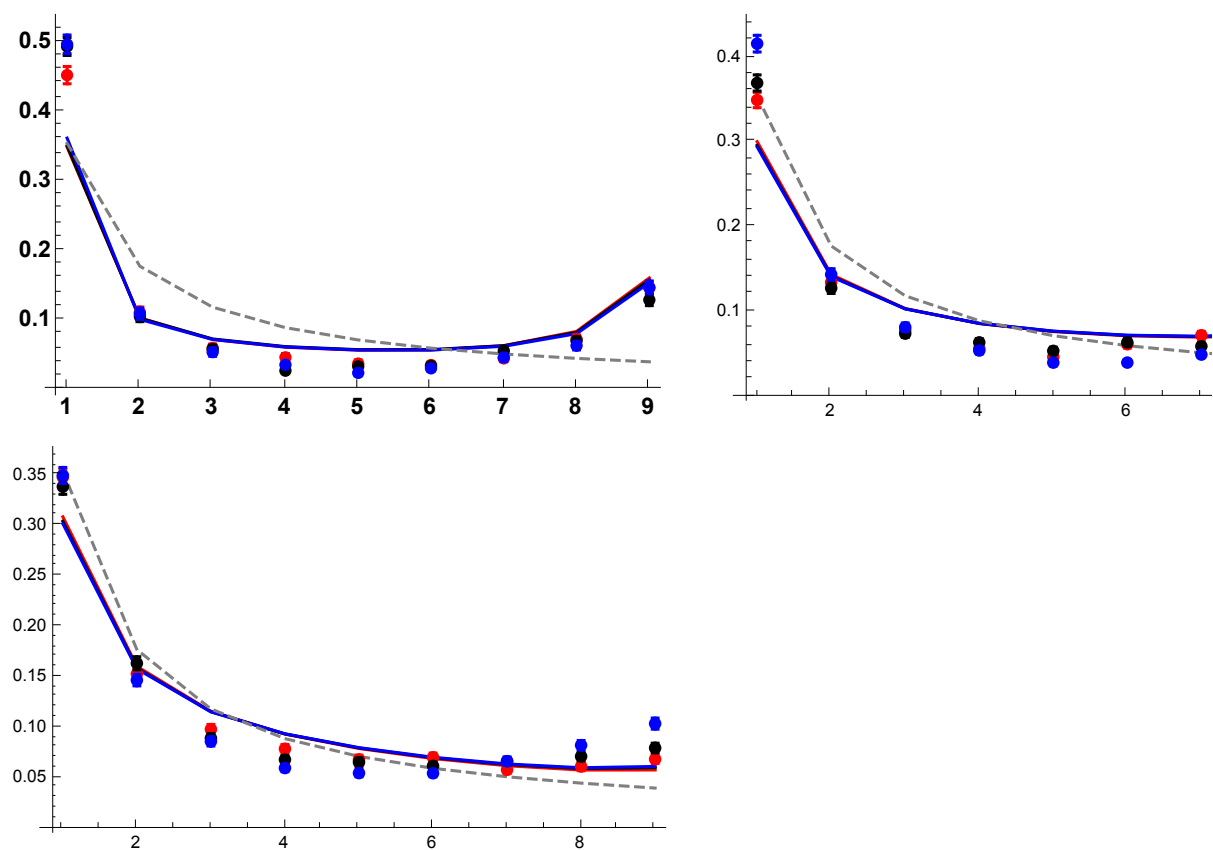

$\sigma = 0.95, F \approx 0.904$  case

Results with  $p_0 = 1/2N$

R = 100

```

datfDNR100h01s095 =
  Import["SLIM_SFS_F09/SFSTab_R_100_h_0.1_self_0.95_f_1e-04_10b_SLIM.dat",
    "Table"][[1]];
datfDNR100h01s095CI = Import[
  "SLIM_SFS_F09/SFSTab_R_100_h_0.1_self_0.95_f_1e-04_10b_SLIM.dat",
  "Table"][[2]];
datfDNR100h05s095 = Import[
  "SLIM_SFS_F09/SFSTab_R_100_h_0.5_self_0.95_f_1e-04_10b_SLIM.dat",
  "Table"][[1]];
datfDNR100h05s095CI = Import[
  "SLIM_SFS_F09/SFSTab_R_100_h_0.5_self_0.95_f_1e-04_10b_SLIM.dat",
  "Table"][[2]];
datfDNR100h09s095 = Import[
  "SLIM_SFS_F09/SFSTab_R_100_h_0.9_self_0.95_f_1e-04_10b_SLIM.dat",
  "Table"][[1]];
datfDNR100h09s095CI = Import[
  "SLIM_SFS_F09/SFSTab_R_100_h_0.9_self_0.95_f_1e-04_10b_SLIM.dat",
  "Table"][[2]];
datfDNR100h01s095T = Partition[Riffle[Partition[Riffle[Range[9],
  datfDNR100h01s095], 2], Map[ErrorBar, datfDNR100h01s095CI]], 2];
datfDNR100h05s095T = Partition[Riffle[Partition[Riffle[Range[9],
  datfDNR100h05s095], 2], Map[ErrorBar, datfDNR100h05s095CI]], 2];
datfDNR100h09s095T = Partition[Riffle[Partition[Riffle[Range[9],
  datfDNR100h09s095], 2], Map[ErrorBar, datfDNR100h09s095CI]], 2];

```

```

p1R100s095 =
ListPlot[{{Table[{l, PLNH2[5000, 0.05, 0.1, 0.95, 100, 10, l, Boostp0[5000, 0.05,
    0.1, 0.95],  $\frac{4}{1 + \frac{0.95}{2-0.95}}$ ]}], {l, 1, 9}], Table[{l, PLNH2[5000, 0.05, 0.5, 0.95,
    100, 10, l, Boostp0[5000, 0.05, 0.5, 0.95],  $\frac{4}{1 + \frac{0.95}{2-0.95}}$ ]}], {l, 1, 9}],
    Table[{l, PLNH2[5000, 0.05, 0.9, 0.95, 100, 10, l,
    Boostp0[5000, 0.05, 0.9, 0.95],  $\frac{4}{1 + \frac{0.95}{2-0.95}}$ ]}], {l, 1, 9}],
    Table[{l, PrJ[l, 10]}], {l, 1, 9}}], PlotRange → All,
PlotStyle → {Red, Black, Blue, {Gray, Dashed}}, Joined → True]

```

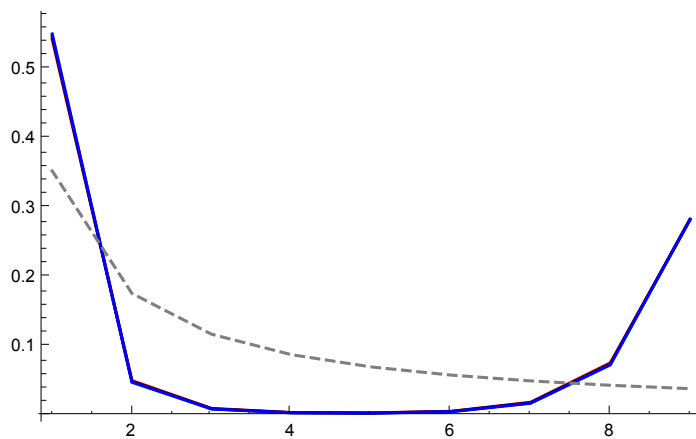

```

p2R100s095 = ErrorListPlot[{datfDNR100h01s095T,
    datfDNR100h05s095T, datfDNR100h09s095T}, PlotRange → All, PlotStyle →
    {{Red, PointSize[0.02]}, {Black, PointSize[0.02]}, {Blue, PointSize[0.02]}}]

```

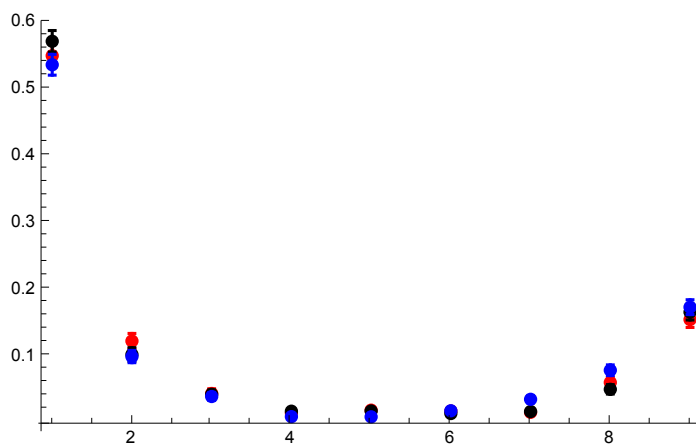

```
p3R100s095 = Show[p1R100s095, p2R100s095, PlotRange -> All]
```

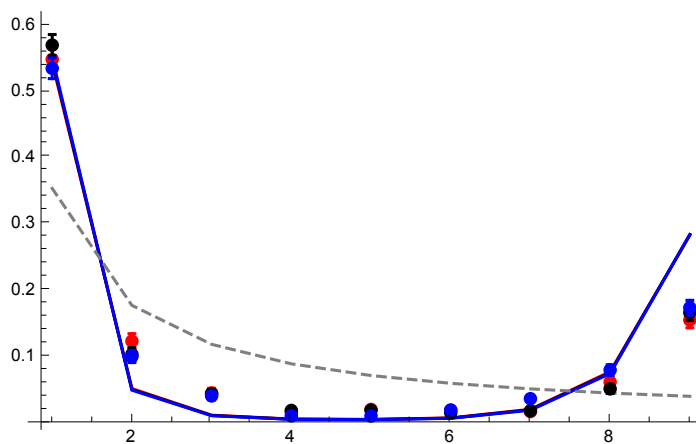

R = 300

```
datfDNR300h01s095 =
  Import["SLIM_SFS_F09/SFSTab_R_300_h_0.1_self_0.95_f_1e-04_10b_SLIM.dat",
    "Table"][[1]];
datfDNR300h01s095CI = Import[
  "SLIM_SFS_F09/SFSTab_R_300_h_0.1_self_0.95_f_1e-04_10b_SLIM.dat",
  "Table"][[2]];
datfDNR300h05s095 = Import[
  "SLIM_SFS_F09/SFSTab_R_300_h_0.5_self_0.95_f_1e-04_10b_SLIM.dat",
  "Table"][[1]];
datfDNR300h05s095CI = Import[
  "SLIM_SFS_F09/SFSTab_R_300_h_0.5_self_0.95_f_1e-04_10b_SLIM.dat",
  "Table"][[2]];
datfDNR300h09s095 = Import[
  "SLIM_SFS_F09/SFSTab_R_300_h_0.9_self_0.95_f_1e-04_10b_SLIM.dat",
  "Table"][[1]];
datfDNR300h09s095CI = Import[
  "SLIM_SFS_F09/SFSTab_R_300_h_0.9_self_0.95_f_1e-04_10b_SLIM.dat",
  "Table"][[2]];
datfDNR300h01s095T = Partition[Riffle[Partition[Riffle[Range[9],
  datfDNR300h01s095], 2], Map[ErrorBar, datfDNR300h01s095CI]], 2];
datfDNR300h05s095T = Partition[Riffle[Partition[Riffle[Range[9],
  datfDNR300h05s095], 2], Map[ErrorBar, datfDNR300h05s095CI]], 2];
datfDNR300h09s095T = Partition[Riffle[Partition[Riffle[Range[9],
  datfDNR300h09s095], 2], Map[ErrorBar, datfDNR300h09s095CI]], 2];
```

```

p1R300s095 =
ListPlot[{{Table[{l, PLNH2[5000, 0.05, 0.1, 0.95, 300, 10, l, Boostp0[5000, 0.05,
0.1, 0.95],  $\frac{4}{1 + \frac{0.95}{2-0.95}}$ ]}], {l, 1, 9}], Table[{l, PLNH2[5000, 0.05, 0.5, 0.95,
300, 10, l, Boostp0[5000, 0.05, 0.5, 0.95],  $\frac{4}{1 + \frac{0.95}{2-0.95}}$ ]}], {l, 1, 9}],
Table[{l, PLNH2[5000, 0.05, 0.9, 0.95, 300, 10, l,
Boostp0[5000, 0.05, 0.9, 0.95],  $\frac{4}{1 + \frac{0.95}{2-0.95}}$ ]}], {l, 1, 9}],
Table[{l, PrJ[l, 10]}], {l, 1, 9}]], PlotRange → All,
PlotStyle → {Red, Black, Blue, {Gray, Dashed}}, Joined → True]

```

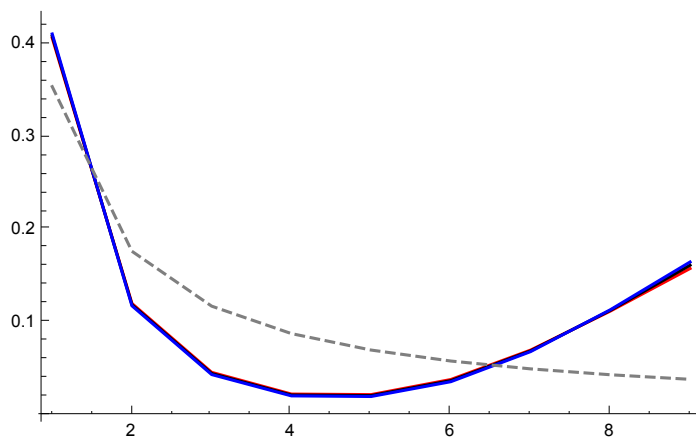

```

p2R300s095 = ErrorListPlot[{datfDNR300h01s095T,
datfDNR300h05s095T, datfDNR300h09s095T}, PlotRange → All, PlotStyle →
{{Red, PointSize[0.02]}, {Black, PointSize[0.02]}, {Blue, PointSize[0.02]}}]

```

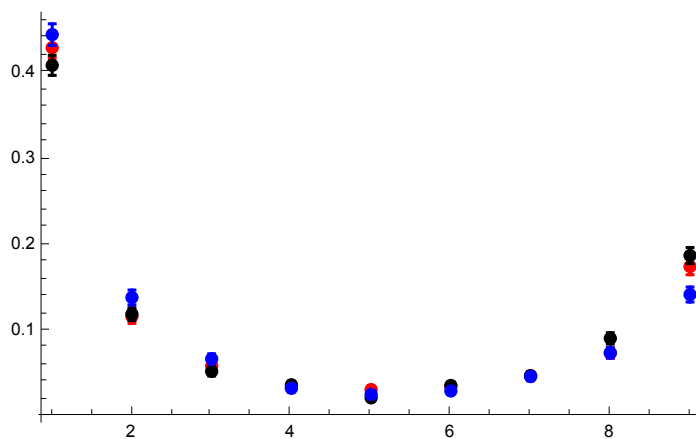

```
p3R300s095 = Show[p1R300s095, p2R300s095, PlotRange -> All]
```

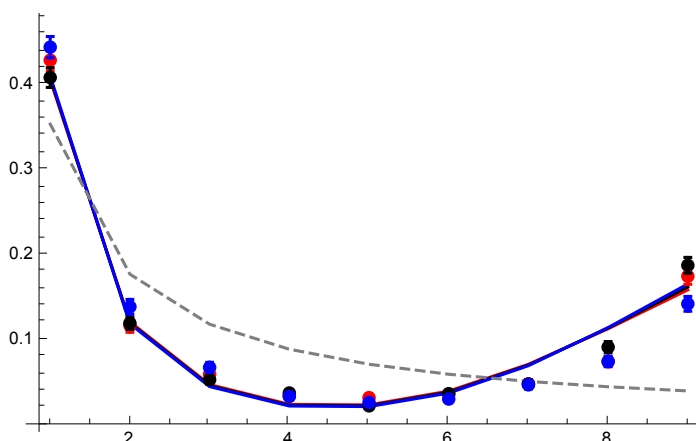

```
R = 500
```

```
datfDNR500h01s095 =
  Import["SLIM_SFS_F09/SFSTab_R_500_h_0.1_self_0.95_f_1e-04_10b_SLIM.dat",
    "Table"][[1]];
datfDNR500h01s095CI = Import[
  "SLIM_SFS_F09/SFSTab_R_500_h_0.1_self_0.95_f_1e-04_10b_SLIM.dat",
  "Table"][[2]];
datfDNR500h05s095 = Import[
  "SLIM_SFS_F09/SFSTab_R_500_h_0.5_self_0.95_f_1e-04_10b_SLIM.dat",
  "Table"][[1]];
datfDNR500h05s095CI = Import[
  "SLIM_SFS_F09/SFSTab_R_500_h_0.5_self_0.95_f_1e-04_10b_SLIM.dat",
  "Table"][[2]];
datfDNR500h09s095 = Import[
  "SLIM_SFS_F09/SFSTab_R_500_h_0.9_self_0.95_f_1e-04_10b_SLIM.dat",
  "Table"][[1]];
datfDNR500h09s095CI = Import[
  "SLIM_SFS_F09/SFSTab_R_500_h_0.9_self_0.95_f_1e-04_10b_SLIM.dat",
  "Table"][[2]];
datfDNR500h01s095T = Partition[Riffle[Partition[Riffle[Range[9],
  datfDNR500h01s095], 2], Map[ErrorBar, datfDNR500h01s095CI]], 2];
datfDNR500h05s095T = Partition[Riffle[Partition[Riffle[Range[9],
  datfDNR500h05s095], 2], Map[ErrorBar, datfDNR500h05s095CI]], 2];
datfDNR500h09s095T = Partition[Riffle[Partition[Riffle[Range[9],
  datfDNR500h09s095], 2], Map[ErrorBar, datfDNR500h09s095CI]], 2];
```

```

p1R500s095 =
ListPlot[{{Table[{l, PLNH2[5000, 0.05, 0.1, 0.95, 500, 10, l, Boostp0[5000, 0.05,
    0.1, 0.95],  $\frac{4}{1 + \frac{0.95}{2-0.95}}$ ]}], {l, 1, 9}], Table[{l, PLNH2[5000, 0.05, 0.5, 0.95,
    500, 10, l, Boostp0[5000, 0.05, 0.5, 0.95],  $\frac{4}{1 + \frac{0.95}{2-0.95}}$ ]}], {l, 1, 9}],
    Table[{l, PLNH2[5000, 0.05, 0.9, 0.95, 500, 10, l,
    Boostp0[5000, 0.05, 0.9, 0.95],  $\frac{4}{1 + \frac{0.95}{2-0.95}}$ ]}], {l, 1, 9}],
    Table[{l, PrJ[l, 10]}], {l, 1, 9}]], PlotRange → All,
    PlotStyle → {Red, Black, Blue, {Gray, Dashed}}, Joined → True]

```

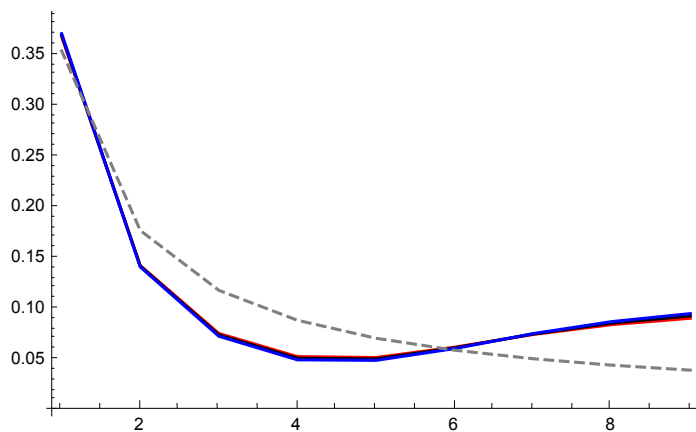

```

p2R500s095 = ErrorListPlot[{datfDNR500h01s095T,
    datfDNR500h05s095T, datfDNR500h09s095T}, PlotRange → All, PlotStyle →
    {{Red, PointSize[0.02]}, {Black, PointSize[0.02]}, {Blue, PointSize[0.02]}}]

```

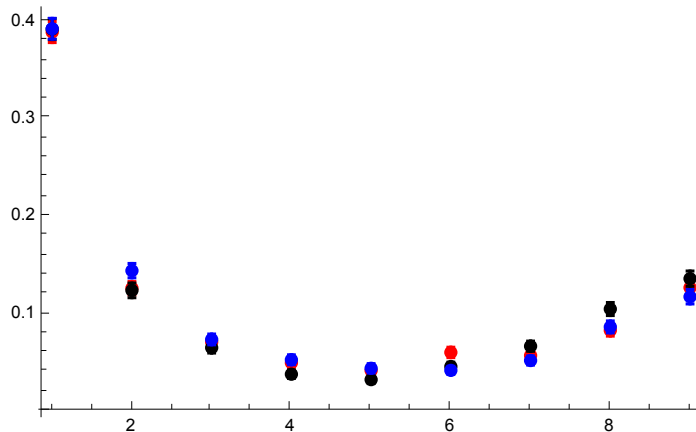

p3R500s095 = Show[p1R500s095, p2R500s095, PlotRange → All]

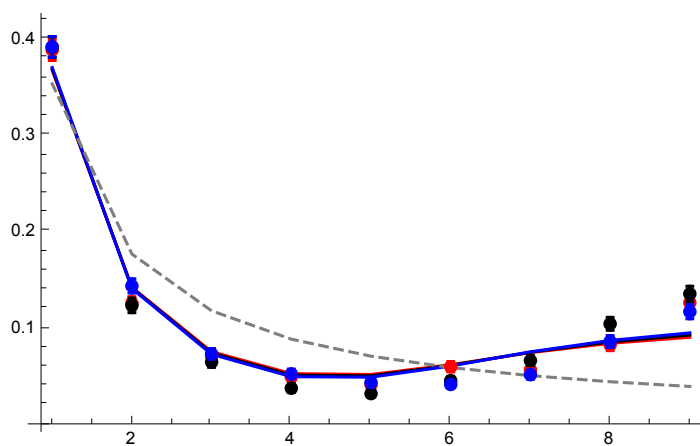

All plots compared

GraphicsGrid[{{p3R100s095, p3R300s095}, {p3R500s095,}}]

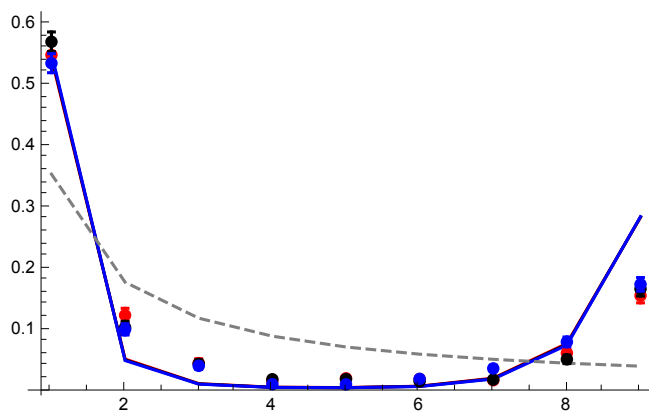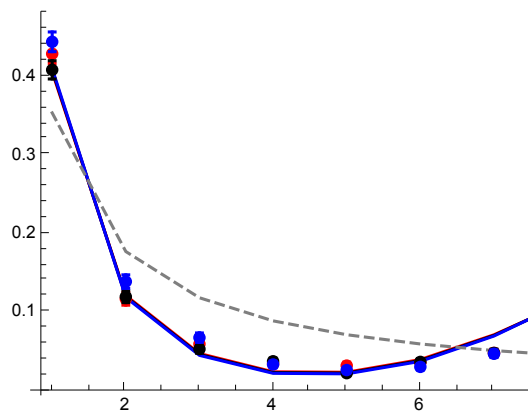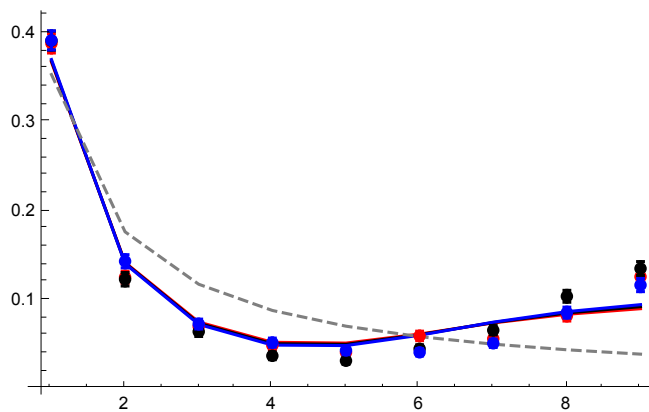

Results with  $p_0 = 0.02$

R = 100



```

datp002R100h01s095 =
  Import["SLIM_SFS_F09/SFSTab_R_100_h_0.1_self_0.95_f_0.02_10b_SLIM.dat",
    "Table"][[1]];
datp002R100h01s095CI = Import[
  "SLIM_SFS_F09/SFSTab_R_100_h_0.1_self_0.95_f_0.02_10b_SLIM.dat",
  "Table"][[2]];
datp002R100h05s095 = Import[
  "SLIM_SFS_F09/SFSTab_R_100_h_0.5_self_0.95_f_0.02_10b_SLIM.dat",
  "Table"][[1]];
datp002R100h05s095CI = Import[
  "SLIM_SFS_F09/SFSTab_R_100_h_0.5_self_0.95_f_0.02_10b_SLIM.dat",
  "Table"][[2]];
datp002R100h09s095 = Import[
  "SLIM_SFS_F09/SFSTab_R_100_h_0.9_self_0.95_f_0.02_10b_SLIM.dat",
  "Table"][[1]];
datp002R100h09s095CI = Import[
  "SLIM_SFS_F09/SFSTab_R_100_h_0.9_self_0.95_f_0.02_10b_SLIM.dat",
  "Table"][[2]];
datp002R100h01s095T = Partition[Riffle[Partition[Riffle[Range[9],
  datp002R100h01s095], 2], Map[ErrorBar, datp002R100h01s095CI]], 2];
datp002R100h05s095T = Partition[Riffle[Partition[Riffle[Range[9],
  datp002R100h05s095], 2], Map[ErrorBar, datp002R100h05s095CI]], 2];
datp002R100h09s095T = Partition[Riffle[Partition[Riffle[Range[9],
  datp002R100h09s095], 2], Map[ErrorBar, datp002R100h09s095CI]], 2];

```

```

p1R100s095 = ListPlot[
  {Table[{l, PLNH2[5000, 0.05, 0.1, 0.95, 100, 10, l, 0.02,  $\frac{4}{1 + \frac{0.95}{2-0.95}}$ ]}], {l, 1, 9}},
  Table[{l, PLNH2[5000, 0.05, 0.5, 0.95, 100, 10, l, 0.02,  $\frac{4}{1 + \frac{0.95}{2-0.95}}$ ]}], {l, 1, 9}},
  Table[{l, PLNH2[5000, 0.05, 0.9, 0.95, 100, 10, l, 0.02,  $\frac{4}{1 + \frac{0.95}{2-0.95}}$ ]}], {l, 1, 9}},
  Table[{l, PrJ[l, 10]}], {l, 1, 9}], PlotRange → All,
  PlotStyle → {Red, Black, Blue, {Gray, Dashed}}, Joined → True]

```

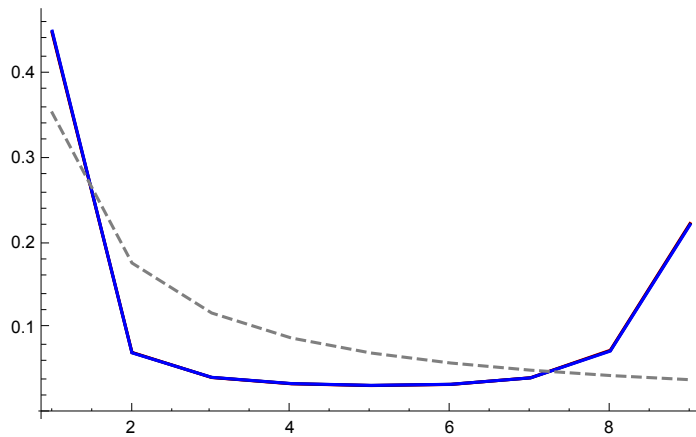

```

p2R100s095 = ErrorListPlot[{datp002R100h01s095T,
  datp002R100h05s095T, datp002R100h09s095T}, PlotRange → All, PlotStyle →
  {{Red, PointSize[0.02]}}, {Black, PointSize[0.02]}}, {Blue, PointSize[0.02]}]}]

```

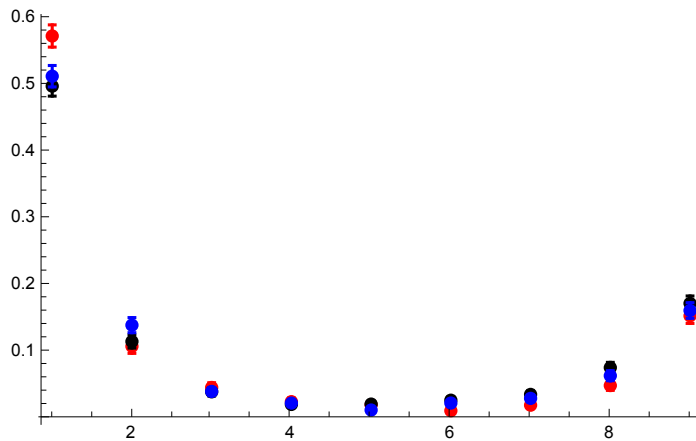

```
p3R100s095 = Show[p1R100s095, p2R100s095, PlotRange -> All]
```

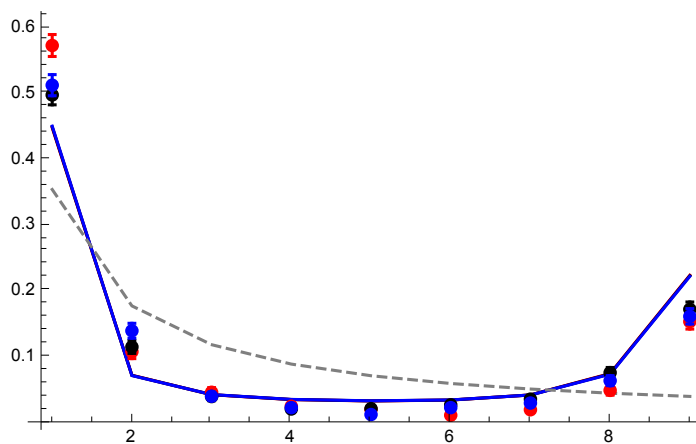

R = 300

```
datp002R300h01s095 =
  Import["SLIM_SFS_F09/SFSTab_R_300_h_0.1_self_0.95_f_0.02_10b_SLIM.dat",
    "Table"][[1]];
datp002R300h01s095CI = Import[
  "SLIM_SFS_F09/SFSTab_R_300_h_0.1_self_0.95_f_0.02_10b_SLIM.dat",
  "Table"][[2]];
datp002R300h05s095 = Import[
  "SLIM_SFS_F09/SFSTab_R_300_h_0.5_self_0.95_f_0.02_10b_SLIM.dat",
  "Table"][[1]];
datp002R300h05s095CI = Import[
  "SLIM_SFS_F09/SFSTab_R_300_h_0.5_self_0.95_f_0.02_10b_SLIM.dat",
  "Table"][[2]];
datp002R300h09s095 = Import[
  "SLIM_SFS_F09/SFSTab_R_300_h_0.9_self_0.95_f_0.02_10b_SLIM.dat",
  "Table"][[1]];
datp002R300h09s095CI = Import[
  "SLIM_SFS_F09/SFSTab_R_300_h_0.9_self_0.95_f_0.02_10b_SLIM.dat",
  "Table"][[2]];
datp002R300h01s095T = Partition[Riffle[Partition[Riffle[Range[9],
  datp002R300h01s095], 2], Map[ErrorBar, datp002R300h01s095CI]], 2];
datp002R300h05s095T = Partition[Riffle[Partition[Riffle[Range[9],
  datp002R300h05s095], 2], Map[ErrorBar, datp002R300h05s095CI]], 2];
datp002R300h09s095T = Partition[Riffle[Partition[Riffle[Range[9],
  datp002R300h09s095], 2], Map[ErrorBar, datp002R300h09s095CI]], 2];
```

```

p1R300s095 = ListPlot[
  {Table[{l, PLNH2[5000, 0.05, 0.1, 0.95, 300, 10, l, 0.02,  $\frac{4}{1 + \frac{0.95}{2-0.95}}$ ]}], {l, 1, 9}},
  Table[{l, PLNH2[5000, 0.05, 0.5, 0.95, 300, 10, l, 0.02,  $\frac{4}{1 + \frac{0.95}{2-0.95}}$ ]}], {l, 1, 9}},
  Table[{l, PLNH2[5000, 0.05, 0.9, 0.95, 300, 10, l, 0.02,  $\frac{4}{1 + \frac{0.95}{2-0.95}}$ ]}], {l, 1, 9}},
  Table[{l, PrJ[l, 10]}], {l, 1, 9}], PlotRange → All,
  PlotStyle → {Red, Black, Blue, {Gray, Dashed}}, Joined → True]

```

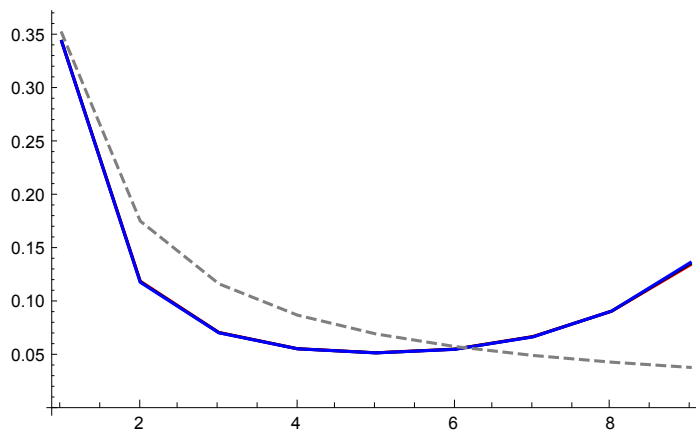

```

p2R300s095 = ErrorListPlot[{datp002R300h01s095T,
  datp002R300h05s095T, datp002R300h09s095T}, PlotRange → All, PlotStyle →
  {{Red, PointSize[0.02]}, {Black, PointSize[0.02]}, {Blue, PointSize[0.02]}}]

```

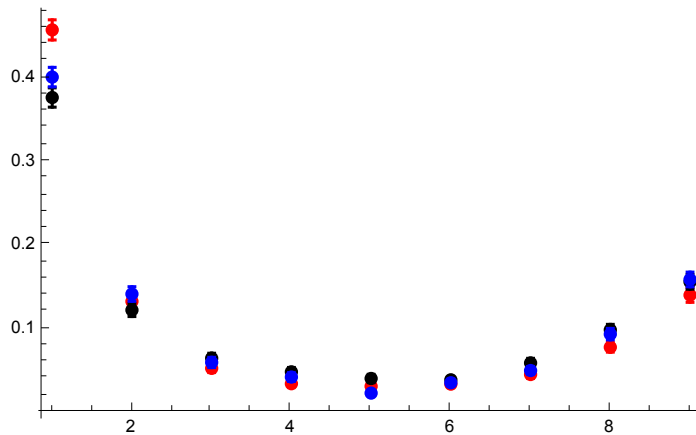

```
p3R300s095 = Show[p1R300s095, p2R300s095, PlotRange -> All]
```

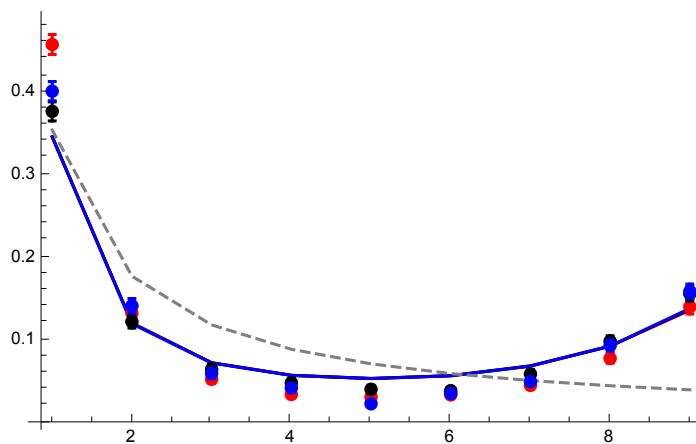

```
R = 500
```

```
datp002R500h01s095 =
  Import["SLIM_SFS_F09/SFSTab_R_500_h_0.1_self_0.95_f_0.02_10b_SLIM.dat",
    "Table"][[1]];
datp002R500h01s095CI = Import[
  "SLIM_SFS_F09/SFSTab_R_500_h_0.1_self_0.95_f_0.02_10b_SLIM.dat",
  "Table"][[2]];
datp002R500h05s095 = Import[
  "SLIM_SFS_F09/SFSTab_R_500_h_0.5_self_0.95_f_0.02_10b_SLIM.dat",
  "Table"][[1]];
datp002R500h05s095CI = Import[
  "SLIM_SFS_F09/SFSTab_R_500_h_0.5_self_0.95_f_0.02_10b_SLIM.dat",
  "Table"][[2]];
datp002R500h09s095 = Import[
  "SLIM_SFS_F09/SFSTab_R_500_h_0.9_self_0.95_f_0.02_10b_SLIM.dat",
  "Table"][[1]];
datp002R500h09s095CI = Import[
  "SLIM_SFS_F09/SFSTab_R_500_h_0.9_self_0.95_f_0.02_10b_SLIM.dat",
  "Table"][[2]];
datp002R500h01s095T = Partition[Riffle[Partition[Riffle[Range[9],
  datp002R500h01s095], 2], Map[ErrorBar, datp002R500h01s095CI]], 2];
datp002R500h05s095T = Partition[Riffle[Partition[Riffle[Range[9],
  datp002R500h05s095], 2], Map[ErrorBar, datp002R500h05s095CI]], 2];
datp002R500h09s095T = Partition[Riffle[Partition[Riffle[Range[9],
  datp002R500h09s095], 2], Map[ErrorBar, datp002R500h09s095CI]], 2];
```

```

p1R500s095 = ListPlot[
  {Table[{l, PLNH2[5000, 0.05, 0.1, 0.95, 500, 10, l, 0.02,  $\frac{4}{1 + \frac{0.95}{2-0.95}}$ ]}], {l, 1, 9}},
  Table[{l, PLNH2[5000, 0.05, 0.5, 0.95, 500, 10, l, 0.02,  $\frac{4}{1 + \frac{0.95}{2-0.95}}$ ]}], {l, 1, 9}},
  Table[{l, PLNH2[5000, 0.05, 0.9, 0.95, 500, 10, l, 0.02,  $\frac{4}{1 + \frac{0.95}{2-0.95}}$ ]}], {l, 1, 9}},
  Table[{l, PrJ[l, 10]}], {l, 1, 9}], PlotRange → All,
  PlotStyle → {Red, Black, Blue, {Gray, Dashed}}, Joined → True]

```

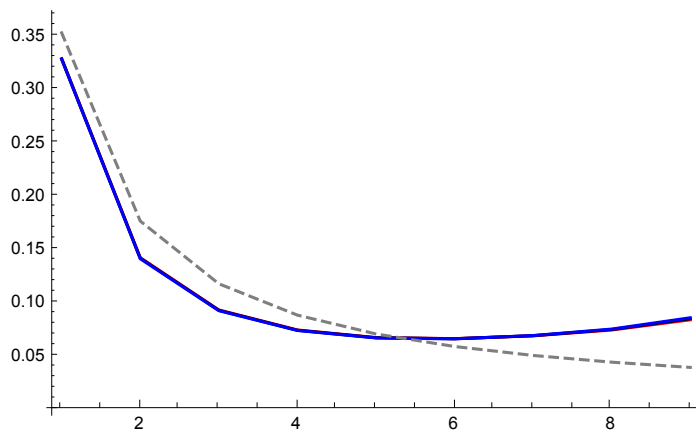

```

p2R500s095 = ErrorListPlot[{datp002R500h01s095T,
  datp002R500h05s095T, datp002R500h09s095T}, PlotRange → All, PlotStyle →
  {{Red, PointSize[0.02]}, {Black, PointSize[0.02]}, {Blue, PointSize[0.02]}}]

```

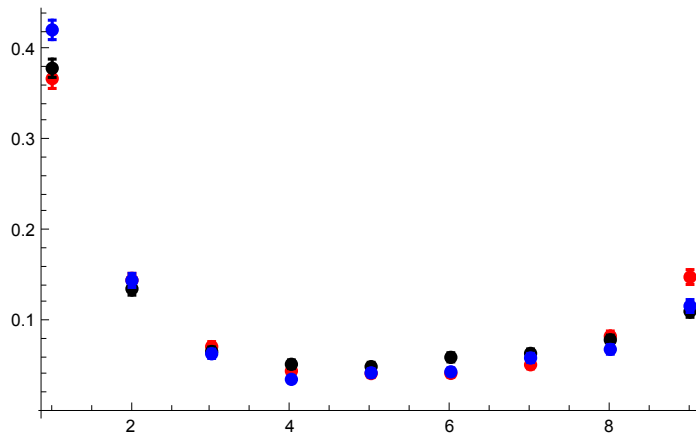

p3R500s095 = Show[p1R500s095, p2R500s095, PlotRange → All]

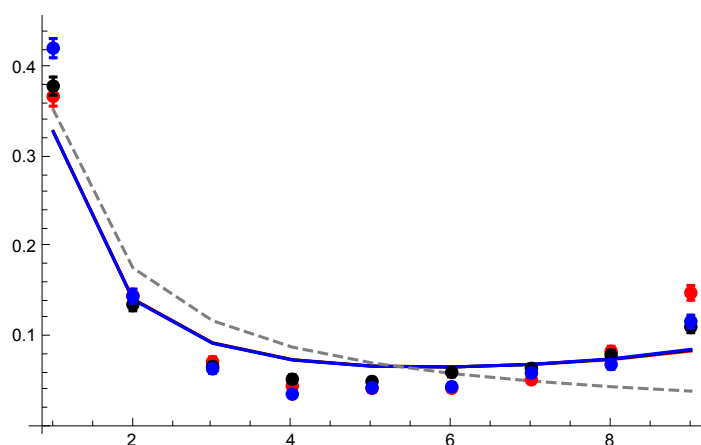

All plots compared

GraphicsGrid[{{p3R100s095, p3R300s095}, {p3R500s095,}}]

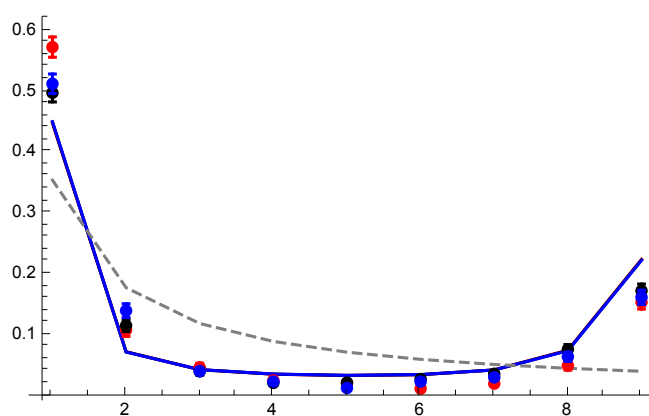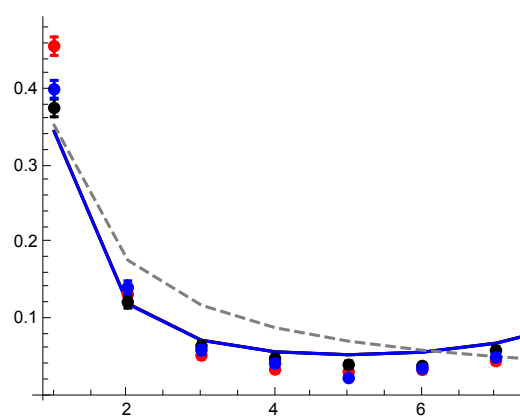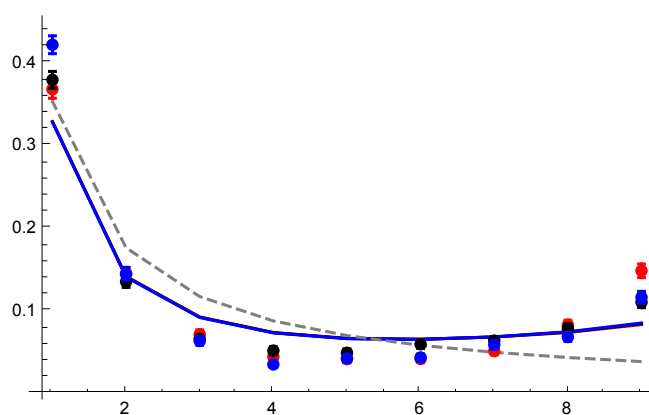

Results with  $p_0 = 0.05$

R = 100

```

datp005R100h01s095 =
  Import["SLIM_SFS_F09/SFSTab_R_100_h_0.1_self_0.95_f_0.05_10b_SLIM.dat",
    "Table"][[1]];
datp005R100h01s095CI = Import[
  "SLIM_SFS_F09/SFSTab_R_100_h_0.1_self_0.95_f_0.05_10b_SLIM.dat",
  "Table"][[2]];
datp005R100h05s095 = Import[
  "SLIM_SFS_F09/SFSTab_R_100_h_0.5_self_0.95_f_0.05_10b_SLIM.dat",
  "Table"][[1]];
datp005R100h05s095CI = Import[
  "SLIM_SFS_F09/SFSTab_R_100_h_0.5_self_0.95_f_0.05_10b_SLIM.dat",
  "Table"][[2]];
datp005R100h09s095 = Import[
  "SLIM_SFS_F09/SFSTab_R_100_h_0.9_self_0.95_f_0.05_10b_SLIM.dat",
  "Table"][[1]];
datp005R100h09s095CI = Import[
  "SLIM_SFS_F09/SFSTab_R_100_h_0.9_self_0.95_f_0.05_10b_SLIM.dat",
  "Table"][[2]];
datp005R100h01s095T = Partition[Riffle[Partition[Riffle[Range[9],
  datp005R100h01s095], 2], Map[ErrorBar, datp005R100h01s095CI]], 2];
datp005R100h05s095T = Partition[Riffle[Partition[Riffle[Range[9],
  datp005R100h05s095], 2], Map[ErrorBar, datp005R100h05s095CI]], 2];
datp005R100h09s095T = Partition[Riffle[Partition[Riffle[Range[9],
  datp005R100h09s095], 2], Map[ErrorBar, datp005R100h09s095CI]], 2];

```



```

p1R100s095 = ListPlot[
  {Table[{l, PLNH2[5000, 0.05, 0.1, 0.95, 100, 10, l, 0.05,  $\frac{4}{1 + \frac{0.95}{2-0.95}}$ ]}], {l, 1, 9}},
  Table[{l, PLNH2[5000, 0.05, 0.5, 0.95, 100, 10, l, 0.05,  $\frac{4}{1 + \frac{0.95}{2-0.95}}$ ]}], {l, 1, 9}},
  Table[{l, PLNH2[5000, 0.05, 0.9, 0.95, 100, 10, l, 0.05,  $\frac{4}{1 + \frac{0.95}{2-0.95}}$ ]}], {l, 1, 9}},
  Table[{l, PrJ[l, 10]}], {l, 1, 9}], PlotRange → All,
  PlotStyle → {Red, Black, Blue, {Gray, Dashed}}, Joined → True]

```

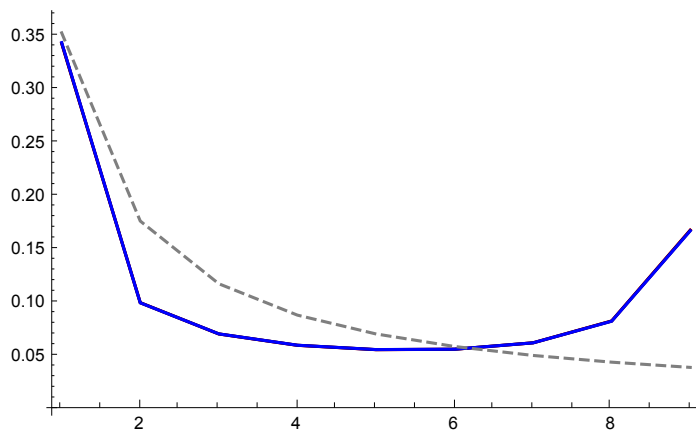

```

p2R100s095 = ErrorListPlot[{datp005R100h01s095T,
  datp005R100h05s095T, datp005R100h09s095T}, PlotRange → All, PlotStyle →
  {{Red, PointSize[0.02]}, {Black, PointSize[0.02]}, {Blue, PointSize[0.02]}}]

```

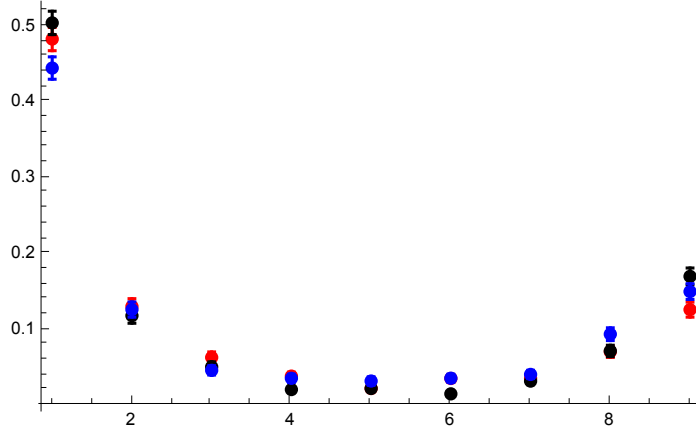

```
p3R100s095 = Show[p1R100s095, p2R100s095, PlotRange -> All]
```

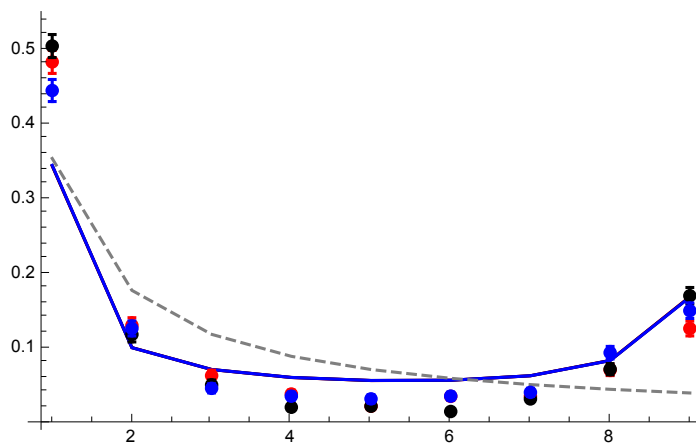

```
R = 300
```

```
datp005R300h01s095 =
  Import["SLIM_SFS_F09/SFSTab_R_300_h_0.1_self_0.95_f_0.05_10b_SLIM.dat",
    "Table"][[1]];
datp005R300h01s095CI = Import[
  "SLIM_SFS_F09/SFSTab_R_300_h_0.1_self_0.95_f_0.05_10b_SLIM.dat",
  "Table"][[2]];
datp005R300h05s095 = Import[
  "SLIM_SFS_F09/SFSTab_R_300_h_0.5_self_0.95_f_0.05_10b_SLIM.dat",
  "Table"][[1]];
datp005R300h05s095CI = Import[
  "SLIM_SFS_F09/SFSTab_R_300_h_0.5_self_0.95_f_0.05_10b_SLIM.dat",
  "Table"][[2]];
datp005R300h09s095 = Import[
  "SLIM_SFS_F09/SFSTab_R_300_h_0.9_self_0.95_f_0.05_10b_SLIM.dat",
  "Table"][[1]];
datp005R300h09s095CI = Import[
  "SLIM_SFS_F09/SFSTab_R_300_h_0.9_self_0.95_f_0.05_10b_SLIM.dat",
  "Table"][[2]];
datp005R300h01s095T = Partition[Riffle[Partition[Riffle[Range[9],
  datp005R300h01s095], 2], Map[ErrorBar, datp005R300h01s095CI]], 2];
datp005R300h05s095T = Partition[Riffle[Partition[Riffle[Range[9],
  datp005R300h05s095], 2], Map[ErrorBar, datp005R300h05s095CI]], 2];
datp005R300h09s095T = Partition[Riffle[Partition[Riffle[Range[9],
  datp005R300h09s095], 2], Map[ErrorBar, datp005R300h09s095CI]], 2];
```

```

p1R300s095 = ListPlot[
  {Table[{l, PLNH2[5000, 0.05, 0.1, 0.95, 300, 10, l, 0.05,  $\frac{4}{1 + \frac{0.95}{2-0.95}}$ ]}], {l, 1, 9}},
  Table[{l, PLNH2[5000, 0.05, 0.5, 0.95, 300, 10, l, 0.05,  $\frac{4}{1 + \frac{0.95}{2-0.95}}$ ]}], {l, 1, 9}},
  Table[{l, PLNH2[5000, 0.05, 0.9, 0.95, 300, 10, l, 0.05,  $\frac{4}{1 + \frac{0.95}{2-0.95}}$ ]}], {l, 1, 9}},
  Table[{l, PrJ[l, 10]}], {l, 1, 9}], PlotRange → All,
  PlotStyle → {Red, Black, Blue, {Gray, Dashed}}, Joined → True]

```

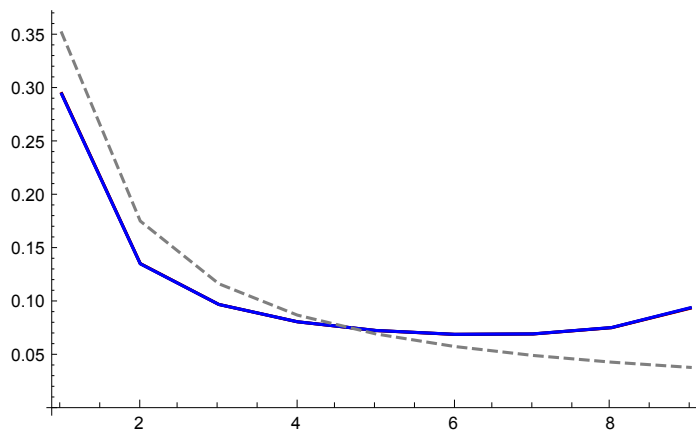

```

p2R300s095 = ErrorListPlot[{datp005R300h01s095T,
  datp005R300h05s095T, datp005R300h09s095T}, PlotRange → All, PlotStyle →
  {{Red, PointSize[0.02]}, {Black, PointSize[0.02]}, {Blue, PointSize[0.02]}}]

```

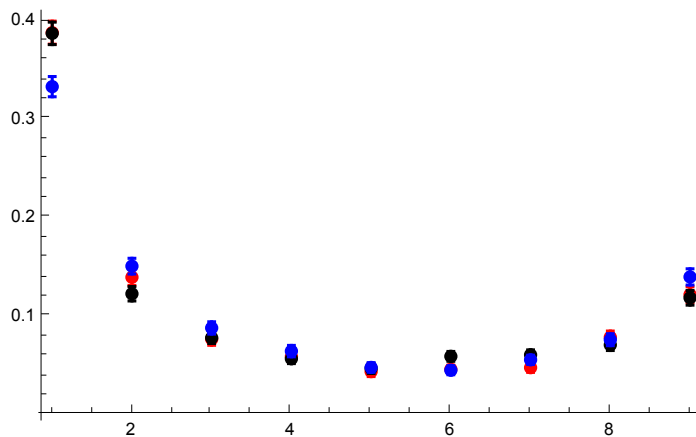

```
p3R300s095 = Show[p1R300s095, p2R300s095, PlotRange → All]
```

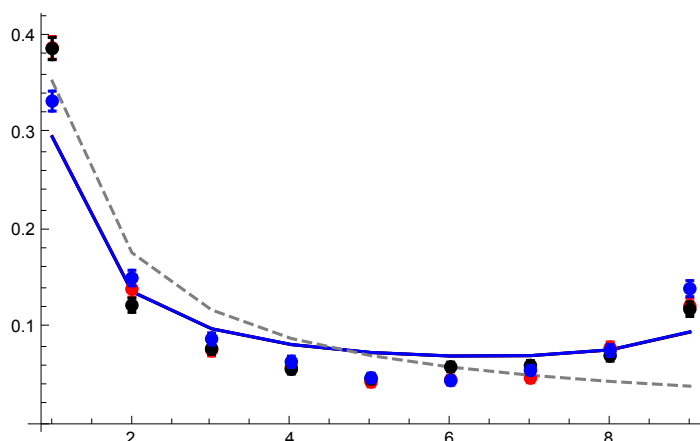

```
R = 500
```

```
datp005R500h01s095 =
  Import["SLIM_SFS_F09/SFSTab_R_500_h_0.1_self_0.95_f_0.05_10b_SLIM.dat",
    "Table"][[1]];
datp005R500h01s095CI = Import[
  "SLIM_SFS_F09/SFSTab_R_500_h_0.1_self_0.95_f_0.05_10b_SLIM.dat",
  "Table"][[2]];
datp005R500h05s095 = Import[
  "SLIM_SFS_F09/SFSTab_R_500_h_0.5_self_0.95_f_0.05_10b_SLIM.dat",
  "Table"][[1]];
datp005R500h05s095CI = Import[
  "SLIM_SFS_F09/SFSTab_R_500_h_0.5_self_0.95_f_0.05_10b_SLIM.dat",
  "Table"][[2]];
datp005R500h09s095 = Import[
  "SLIM_SFS_F09/SFSTab_R_500_h_0.9_self_0.95_f_0.05_10b_SLIM.dat",
  "Table"][[1]];
datp005R500h09s095CI = Import[
  "SLIM_SFS_F09/SFSTab_R_500_h_0.9_self_0.95_f_0.05_10b_SLIM.dat",
  "Table"][[2]];
datp005R500h01s095T = Partition[Riffle[Partition[Riffle[Range[9],
  datp005R500h01s095], 2], Map[ErrorBar, datp005R500h01s095CI]], 2];
datp005R500h05s095T = Partition[Riffle[Partition[Riffle[Range[9],
  datp005R500h05s095], 2], Map[ErrorBar, datp005R500h05s095CI]], 2];
datp005R500h09s095T = Partition[Riffle[Partition[Riffle[Range[9],
  datp005R500h09s095], 2], Map[ErrorBar, datp005R500h09s095CI]], 2];
```

```

p1R500s095 = ListPlot[
  {Table[{l, PLNH2[5000, 0.05, 0.1, 0.95, 500, 10, l, 0.05,  $\frac{4}{1 + \frac{0.95}{2-0.95}}$ ]}], {l, 1, 9}},
  Table[{l, PLNH2[5000, 0.05, 0.5, 0.95, 500, 10, l, 0.05,  $\frac{4}{1 + \frac{0.95}{2-0.95}}$ ]}], {l, 1, 9}},
  Table[{l, PLNH2[5000, 0.05, 0.9, 0.95, 500, 10, l, 0.05,  $\frac{4}{1 + \frac{0.95}{2-0.95}}$ ]}], {l, 1, 9}},
  Table[{l, PrJ[l, 10]}], {l, 1, 9}], PlotRange → All,
  PlotStyle → {Red, Black, Blue, {Gray, Dashed}}, Joined → True]

```

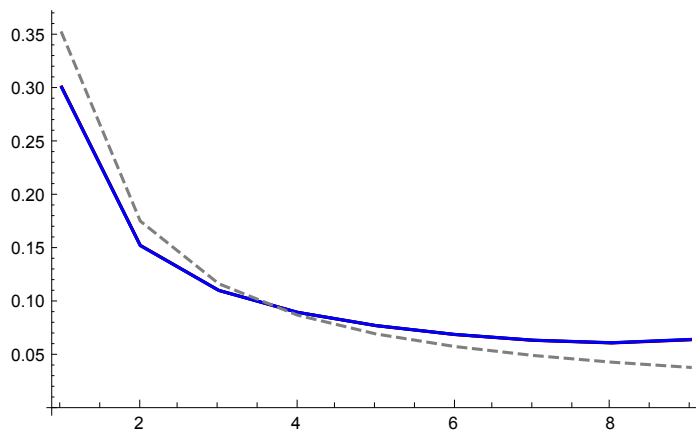

```

p2R500s095 = ErrorListPlot[{datp005R500h01s095T,
  datp005R500h05s095T, datp005R500h09s095T}, PlotRange → All, PlotStyle →
  {{Red, PointSize[0.02]}, {Black, PointSize[0.02]}, {Blue, PointSize[0.02]}}]

```

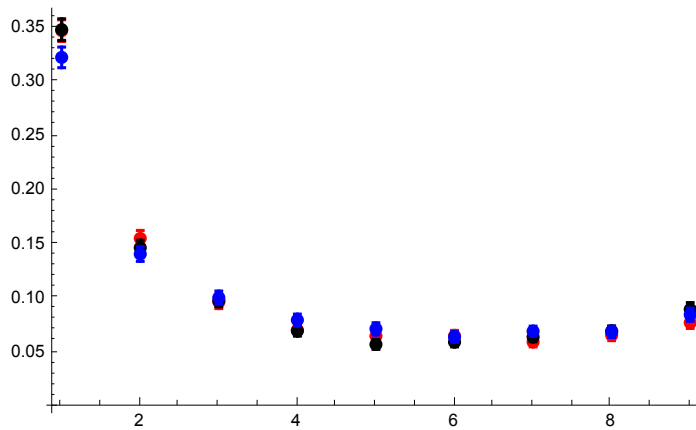

```
p3R500s095 = Show[p1R500s095, p2R500s095, PlotRange -> All]
```

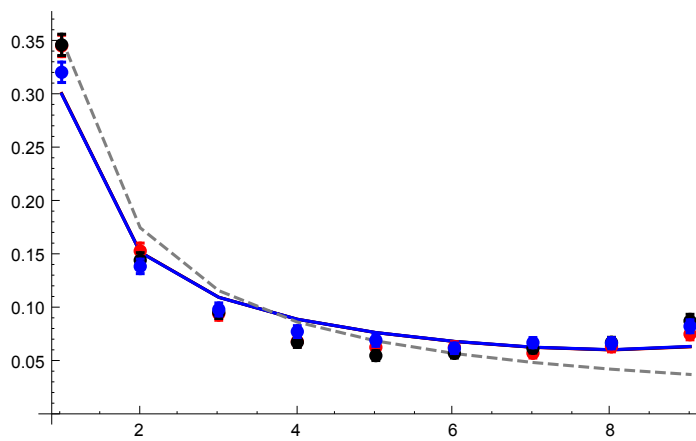

All plots compared

```
GraphicsGrid[{{p3R100s095, p3R300s095}, {p3R500s095,}}]
```

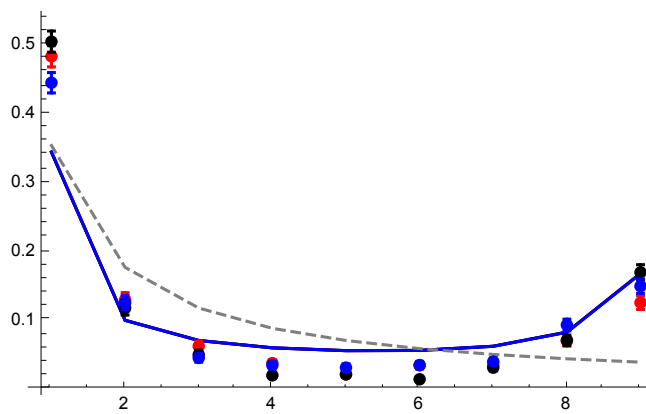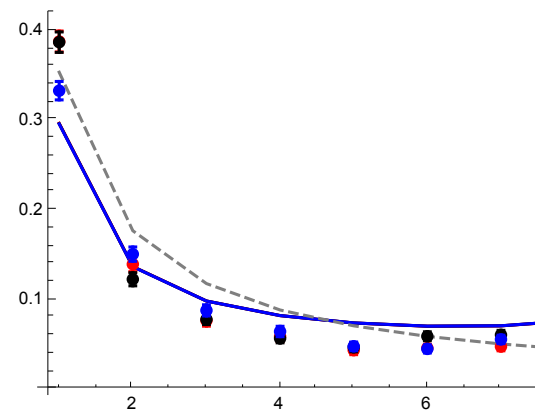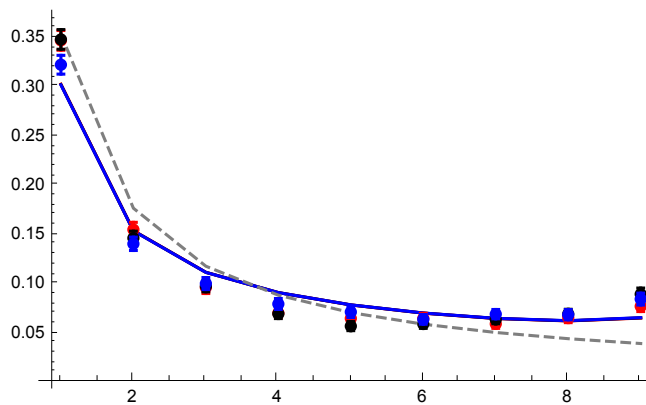

## Grid of key results

### Comparing analytical results and SLiM simulations

Full list:

```

SimCompSFS = Labeled[
  Grid[{{Text@TraditionalForm@Style[" $p_0 = 1/2N$ ", 24], Text@TraditionalForm@
    Style[" $p_0 = 0.02$ ", 24], Text@TraditionalForm@Style[" $p_0 = 0.05$ ", 24]},},
  {p3AR6s0DN, p3AR6s0p02, p3AR6s0p05, Text@TraditionalForm@
    Style[" $\sigma = 0.00 \backslash n (F = 0.00, \backslash n R = 6)$ ", 24]},
  {p3R11s05DN, p3R11s05p02, p3R11s05p05,
    Text@TraditionalForm@Style[" $\sigma = 0.50 \backslash n (F = 0.33, \backslash n R = 11)$ ", 24]}},
  Spacings -> {2, 1}], {Text@TraditionalForm@Style["Frequency", 24],
  Text@TraditionalForm@Style["Derived Allele Count", 24]}, {Left, Bottom}]

```

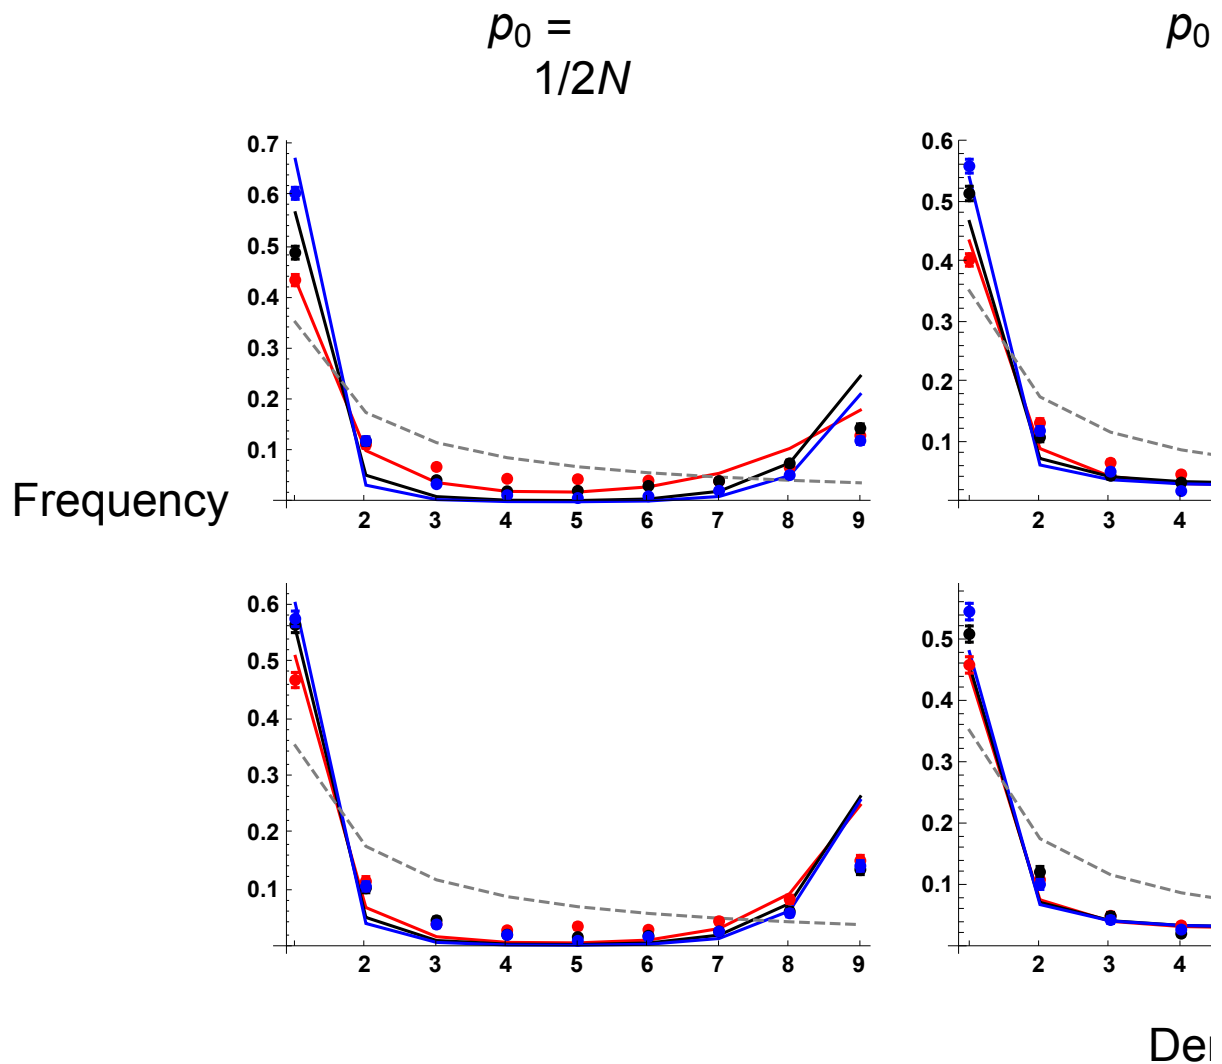

Reduced grid:

```

SimCompSFS2 = Labeled[Grid[{{Text@TraditionalForm@Style[" $p_0 = 1/2N$ ", 24],
  Text@TraditionalForm@Style[" $p_0 = 0.05$ ", 24],}, {p3AR6s0DN, p3AR6s0p05,
  Text@TraditionalForm@Style[" $\sigma = 0.00 \backslash n (F = 0.00, \backslash n R = 6)$ ", 24]},
  {p3R11s05DN, p3R11s05p05,
  Text@TraditionalForm@Style[" $\sigma = 0.50 \backslash n (F = 0.33, \backslash n R = 11)$ ", 24]}},
  Spacings -> {2, 1}], {Text@TraditionalForm@Style["Frequency", 24],
  Text@TraditionalForm@Style["Derived Allele Count", 24]}, {Left, Bottom}]

```

 $p_0 = 1/2N$ 
 $p_0 =$ 
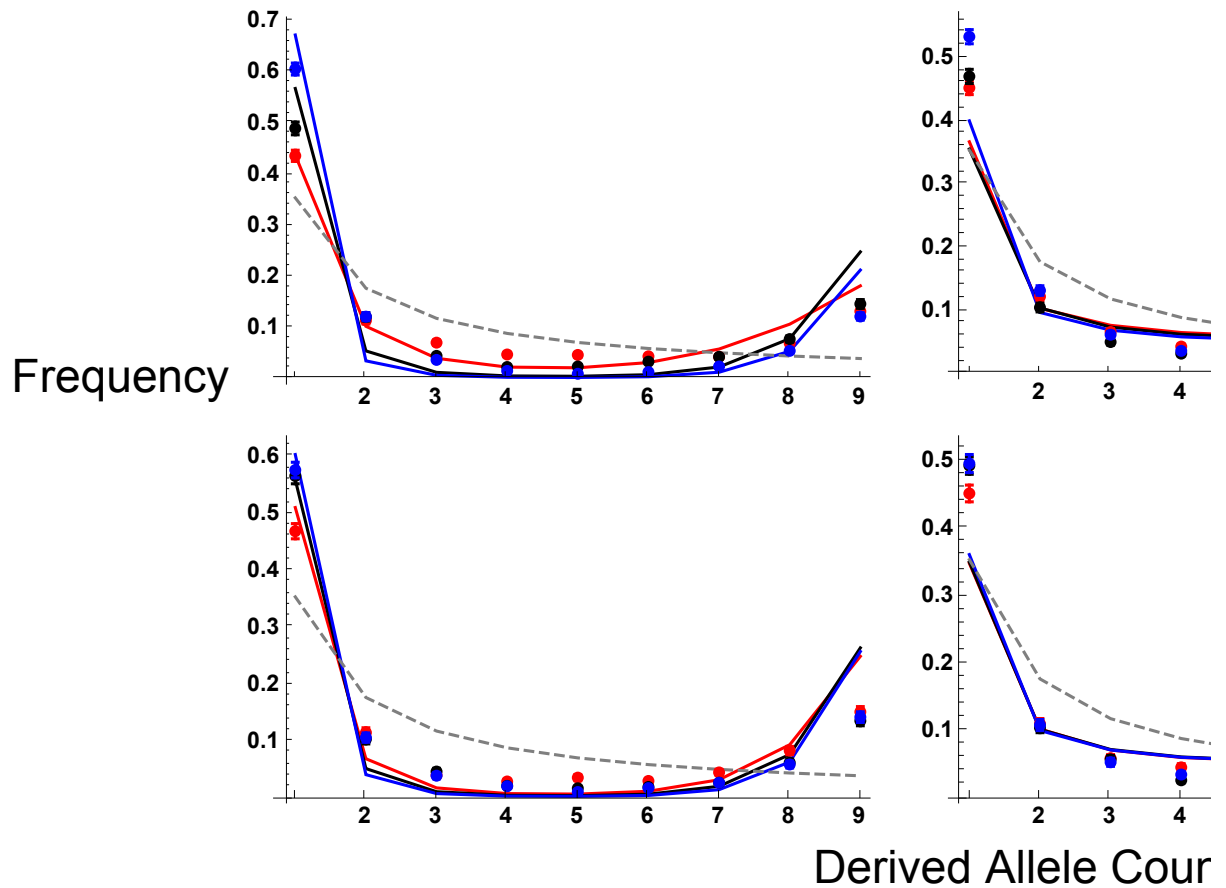



## Comparing SLiM and MSMS simulations ( $\sigma = 0$ )

SLIMandMSMSCompSFS =

```
Labeled[Grid[{{Text@TraditionalForm@Style[" $p_0 = 1/2N$ ", 24], Text@
TraditionalForm@Style[" $p_0 = 0.02$ ", 24], Text@TraditionalForm@
Style[" $p_0 = 0.05$ ", 24]}, {Text@TraditionalForm@Style[
"Red points: forward-in-time\nPink points: coalescent simulations",
14, TextAlignment → Center], Text@TraditionalForm@Style[
"Black points: forward-in-time\nGrey points: coalescent simulations",
14, TextAlignment → Center], Text@TraditionalForm@Style[
"Blue points: forward-in-time\nCyan points: coalescent simulations",
14, TextAlignment → Center]}, {
{p3R6s0DN, p3R6s0p02, p3R6s0p05, Text@TraditionalForm@Style[" $R = 6$ ", 24]},
{p3R18s0DN, p3R18s0p02, p3R18s0p05,
Text@TraditionalForm@Style[" $R = 18$ ", 24]}}, Spacings → {2, 1}},
{Text@TraditionalForm@Style["Frequency", 24],
Text@TraditionalForm@Style["Derived Allele Count", 24]}, {Left,
Bottom}]
```

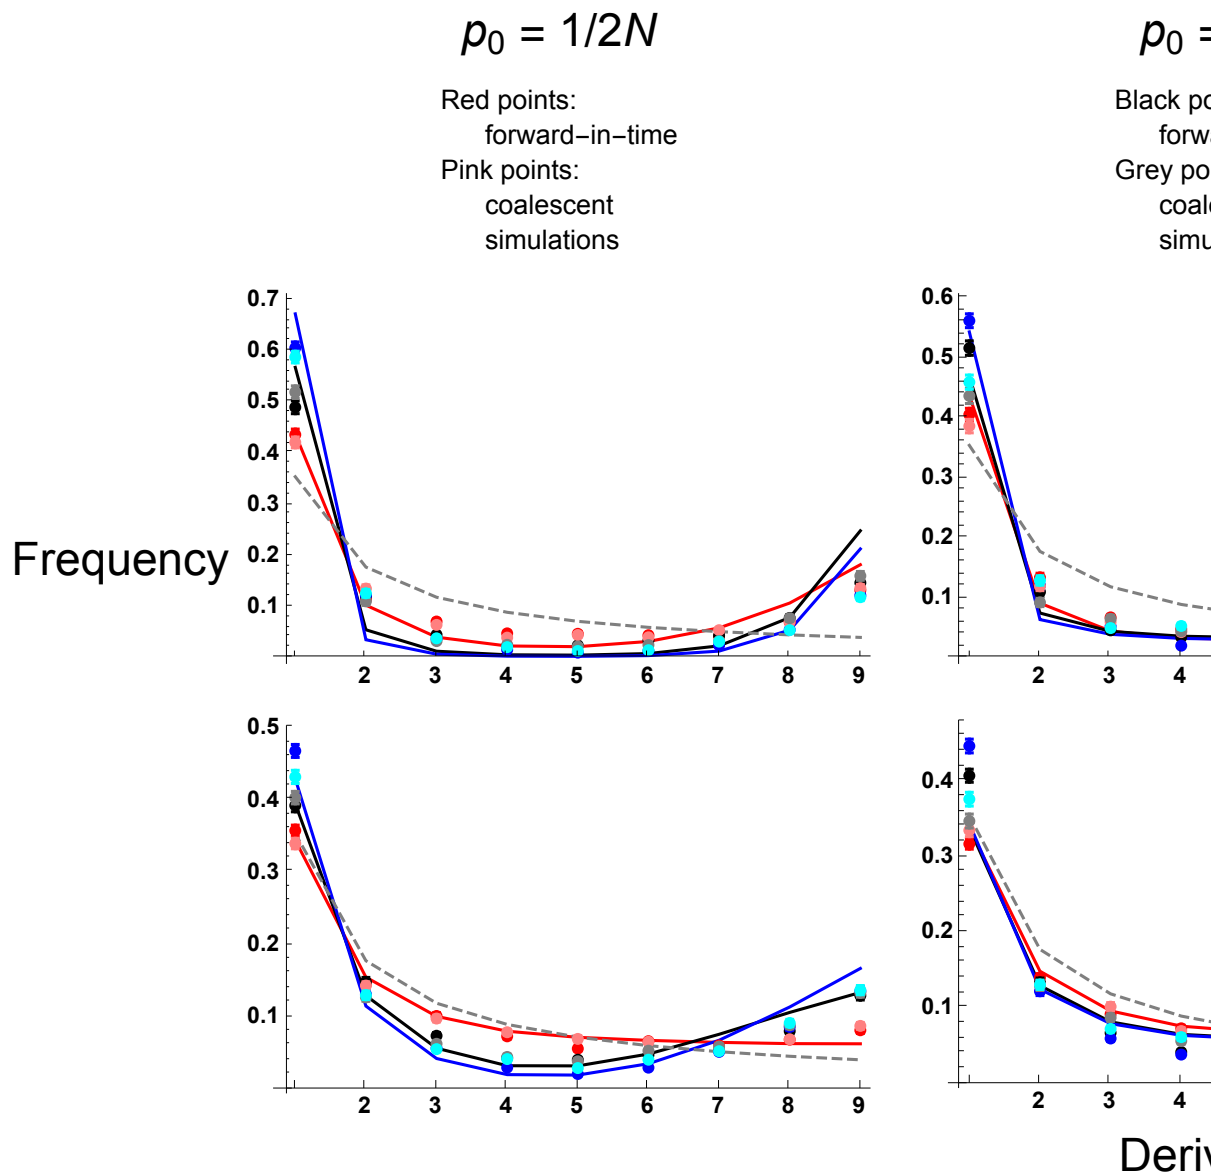

## Section F: Comparing sweeps from standing variation to sweeps from recurrent mutation

Clearing memory before running this section to avoid conflicts with previous sections

```
ClearAll["`*"];
Needs["ErrorBarPlots`"]
```

### Model description

In this scenario, there are five possible outcomes:

- (1) Coalescence during the sweep phase;
- (2) Recombination during the sweep phase;
- (3) Mutation during the sweep phase;

- (4) Coalescence at the allele origin;  
 (5) Mutation at the allele origin.

Note that we do not consider recombination during the 'standing phase' since it does not exist in this model.

If events (1), (4) occur then  $\pi \approx 0$ .

If events (2), (3), (5) occur then  $\pi \approx \pi_0$ , the background levels of diversity.

Hence  $\mathbb{E}(\pi/\pi_0) = P(\text{Event 2}) + P(\text{Event 3}) + P(\text{Event 5})$ .

Going through these in turn;

To calculate  $P(\text{Event 2})$ , we need to determine the probabilities that

- (i) no event (coalescence, recombination, mutation) occurs in the sweep phase when the derived allele is between a frequency of  $p$  to 1;
- (ii) recombination occurs at frequency  $p$ ;
- (iii) integrating this solution over all frequencies  $p$  to 1.

$P(\text{Event 3})$  is calculated in a similar way, but instead at point (ii) we calculate the probability that mutation occurs at frequency  $p$ .

To calculate  $P(\text{Event 5})$ , we need to determine the probabilities that

- (i) no event occurs in the sweep phase when the derived allele is between a frequency of  $p$  to 1;
- (ii) Mutation occurs when the derived allele first appears.

Let's look at the relative probability of each event over each timestep.

If the frequency of the beneficial allele is  $p$  at a certain time, then the probability of coalescence is

$$\frac{1}{2Nep} = \frac{1+F}{2Np}.$$

The probability of one of the two samples recombining out is  $2r(1-2F+\Phi)(1-p)$ .

The probability of one of the two samples mutating is  $2\mu(1-p)/p$ .

The probability of no action occurring at any timepoint is  $1 - \frac{1}{2Nep} - 2r(1-2F+\Phi)(1-p) - 2\mu\frac{(1-p)}{p}$ . The

total probability of neither action over the entire sweep phase is

$$\approx \text{Exp}\left[-\int_{t=0}^{t_f} \left(\frac{1+F}{2Np} + 2r(1-2F+\Phi)(1-p) + \frac{2\mu(1-p)}{p}\right) dt\right] \text{ for fixation time } t_f, \text{ or}$$

$$\int_{p=1-e^{-1}}^{p=0} \frac{\left(\frac{1+F}{2Np} + 2r(1-2F+\Phi)(1-p) + \frac{2\mu(1-p)}{p}\right)}{dp/dt} dp.$$

The sum of the coalescence and recombination probabilities are:

$$2r(1-2F+\Phi)(1-p) + \frac{1+F}{2Na p} + \frac{2\mu(1-p)}{p} \quad // \text{ Together}$$

$$\frac{1}{2Na p} (1+F+4Na p r - 8FNa p r - 4Na p^2 r + 8FNa p^2 r + 4Na \mu - 4Na p \mu + 4Na p r \Phi - 4Na p^2 r \Phi)$$

Tidying up:

$$\frac{1}{2 Na p} (1 + F + 4 Na p (1 - p) (1 - 2 F + \Phi) r + 4 Na (1 - p) \mu) -$$

$$\left\{ \frac{1}{2 Na p} (1 + F + 4 Na p r - 8 F Na p r - 4 Na p^2 r + 8 F Na p^2 r + \right.$$

$$4 Na \mu - 4 Na p \mu + 4 Na p r \Phi - 4 Na p^2 r \Phi) \} // \text{Simplify}$$

$$\{0\}$$

Dividing by  $-s (1 - p) p (F + h - F h + (1 - F) (1 - 2 h) p)$  and taking the indefinite integral;

$$\text{Integrate}[-((1 + F + 4 Na p (1 - p) (1 - 2 F + \Phi) r + 4 Na (1 - p) \mu) /$$

$$((2 Na p) (s (1 - p) p (F + h - F h + (1 - F) (1 - 2 h) p))), p] // \text{Simplify}$$

$$\frac{1}{2 Na s} \left( \frac{1 + F + 4 Na \mu}{(F + h - F h) p} + \frac{(1 + F) \text{Log}[1 - p]}{1 + (-1 + F) h} - \right.$$

$$\left( (-1 + F + F^2 (2 - 8 Na r + h (-3 + 8 Na r)) - 4 Na \mu + h (3 + 4 Na (r + 2 \mu + r \Phi)) - \right.$$

$$4 F Na ((-1 + 2 h) \mu + r (-1 - \Phi + h (3 + \Phi))) \text{Log}[p] \Big) / (F + h - F h)^2 +$$

$$\frac{1}{(1 + (-1 + F) h) (F + h - F h)^2} (-1 + F^3 (-1 + h (4 - 8 Na r) + h^2 (-4 + 8 Na r)) - 4 Na \mu -$$

$$4 h^2 (1 + Na (r + 2 \mu + r \Phi)) + 4 h (1 + Na (r + 3 \mu + r \Phi)) + F (1 + 4 Na (r + \mu + r \Phi) -$$

$$4 h (1 + 4 Na \mu + 2 Na r (2 + \Phi)) + 4 h^2 (1 + 4 Na \mu + 2 Na r (2 + \Phi)) \Big) +$$

$$F^2 (1 - 8 Na r - 4 h^2 (-1 + 2 Na \mu + Na r (5 + \Phi)) + 4 h (-1 + Na (\mu + r (5 + \Phi)))) \Big)$$

$$\text{Log}[F + h + p - F p - 2 h p + F h (-1 + 2 p)] \Big)$$

**SweepIntFHM**[Na\_, s\_, h\_, F\_,  $\Phi$ \_, r\_,  $\mu$ \_, p\_] :=

$$\frac{1}{2 Na s} \left( \frac{1 + F + 4 Na \mu}{(F + h - F h) p} + \frac{(1 + F) \text{Log}[1 - p]}{1 + (-1 + F) h} - \right.$$

$$\left( (-1 + F + F^2 (2 - 8 Na r + h (-3 + 8 Na r)) - 4 Na \mu + h (3 + 4 Na (r + 2 \mu + r \Phi)) - \right.$$

$$4 F Na ((-1 + 2 h) \mu + r (-1 - \Phi + h (3 + \Phi))) \text{Log}[p] \Big) / (F + h - F h)^2 +$$

$$\frac{1}{(1 + (-1 + F) h) (F + h - F h)^2} (-1 + F^3 (-1 + h (4 - 8 Na r) + h^2 (-4 + 8 Na r)) - 4 Na \mu -$$

$$4 h^2 (1 + Na (r + 2 \mu + r \Phi)) + 4 h (1 + Na (r + 3 \mu + r \Phi)) + F (1 + 4 Na (r + \mu + r \Phi) -$$

$$4 h (1 + 4 Na \mu + 2 Na r (2 + \Phi)) + 4 h^2 (1 + 4 Na \mu + 2 Na r (2 + \Phi)) \Big) +$$

$$F^2 (1 - 8 Na r - 4 h^2 (-1 + 2 Na \mu + Na r (5 + \Phi)) + 4 h (-1 + Na (\mu + r (5 + \Phi)))) \Big)$$

$$\text{Log}[F + h + p - F p - 2 h p + F h (-1 + 2 p)] \Big)$$

We can use this integral to calculate (A) the probability of recombination (mutation) during the sweep phase; (B) the probability of coalescence or mutation at the sweep origin, given no actions during the sweep phase.

The total probability of no event occurring for frequency  $p$  is the difference of this integral between  $p$  and  $1 - p_{0,A}(1-h)$  (where  $p_{0,A} (1 - h) = \frac{1+F}{4 Na s (1-h)}$  is the elevated ending frequency for a selected allele going to fixation with dominance  $h$ ). This term is then multiplied by  $(2 r (1-2F+\Phi)(1-$

p)) to determine the probability that recombination acts at frequency  $p$ ; or  $\frac{2\mu(1-p)}{p}$  for the probability that mutations acts at frequency  $p$ .

$$\text{Boostp0}[Na\_ , s\_ , h\_ , F\_ ] := \frac{1 + F}{4 Na s (F + h - F h)}$$

$$\begin{aligned} \text{PRecPFHM}[Na\_ , s\_ , h\_ , F\_ , \vartheta\_ , r\_ , \mu\_ , p\_ ] := \\ (2 r (1 - 2 F + \vartheta) (1 - p)) \text{Exp}[-(\text{SweepIntFHM}[Na, s, h, F, \vartheta, r, \mu, p] - \\ \text{SweepIntFHM}[Na, s, h, F, \vartheta, r, \mu, 1 - \text{Boostp0}[Na, s, 1 - h, F]])] \end{aligned}$$

$$\begin{aligned} \text{PMutPFHM}[Na\_ , s\_ , h\_ , F\_ , \vartheta\_ , r\_ , \mu\_ , p\_ ] := \\ \frac{2 \mu (1 - p)}{p} \text{Exp}[-(\text{SweepIntFHM}[Na, s, h, F, \vartheta, r, \mu, p] - \\ \text{SweepIntFHM}[Na, s, h, F, \vartheta, r, \mu, 1 - \text{Boostp0}[Na, s, 1 - h, F]])] \end{aligned}$$

(A) can be calculated by integrating the total recombination probability between  $p_{0,A}(h)$  and  $1 - p_{0,A}(1-h)$ , again after diving by  $dp/dt$  to convert from a time integral into a frequency integral. It does not appear that this integral has an analytical solution, so this integral is instead integrated numerically:

$$\begin{aligned} \text{PRecFH0}[Na\_ , s\_ , h\_ , F\_ , \vartheta\_ , r\_ , \mu\_ ] := \text{NIntegrate}[ \\ \text{PRecPFHM}[Na, s, h, F, \vartheta, r, \mu, p] / (s (1 - p) p (F + h - F h + (1 - F) (1 - 2 h) p)), \\ \{p, \text{Boostp0}[Na, s, h, F], 1 - \text{Boostp0}[Na, s, 1 - h, F]\}] \end{aligned}$$

$$\begin{aligned} \text{PMutFH0}[Na\_ , s\_ , h\_ , F\_ , \vartheta\_ , r\_ , \mu\_ ] := \text{NIntegrate}[ \\ \text{PMutPFHM}[Na, s, h, F, \vartheta, r, \mu, p] / (s (1 - p) p (F + h - F h + (1 - F) (1 - 2 h) p)), \\ \{p, \text{Boostp0}[Na, s, h, F], 1 - \text{Boostp0}[Na, s, 1 - h, F]\}] \end{aligned}$$

(B) can be calculated by working out (i) the probability of no event acting between frequency  $p_{0,A}(h)$  and  $1 - p_{0,A}(1 - h)$ , and (ii) multiplying it by the probability that a mutation event takes precedence over coalescence at the sweep origin.

(i) is obtained by taking the integral solution (as defined in ‘SweepIntFHM’). For (ii), the probability is equal to:

$$\begin{aligned} & \frac{\frac{2 \mu (1-p0)}{p0}}{\frac{1+F}{2 Na p0} + \frac{2 \mu (1-p0)}{p0}} // \text{FullSimplify} \\ & - \frac{4 Na (-1 + p0) \mu}{1 + F - 4 Na (-1 + p0) \mu} \end{aligned}$$

Which can be rewritten as:

$$\begin{aligned} & \frac{4 Na (1 - p0) \mu}{1 + F + 4 Na (1 - p0) \mu} - \left\{ - \frac{4 Na (-1 + p0) \mu}{1 + F - 4 Na (-1 + p0) \mu} \right\} // \text{Simplify} \\ & \{0\} \end{aligned}$$

This result can be further simplified by assuming  $1-p0 \approx 1$  and substituting in  $\Theta_b = 2 N\mu$ :

$$\frac{4 Na (1 - p_0) \mu}{1 + F + 4 Na (1 - p_0) \mu} \cdot \mu \rightarrow \frac{\theta b}{2 Na} // \text{Simplify}$$

$$\frac{2 (1 - p_0) \theta b}{1 + F - 2 (-1 + p_0) \theta b}$$

$$\frac{2 (1 - p_0) \frac{\theta b}{1+F}}{1 + 2 (1 - p_0) \frac{\theta b}{1+F}} - \left\{ \frac{2 (1 - p_0) \theta b}{1 + F - 2 (-1 + p_0) \theta b} \right\} // \text{Simplify}$$

$$\{0\}$$

The recombination rate ( $R_{lim}$ ) at which the coalescence probability for the std var case equates that for the mutation case:

$$\text{Solve} \left[ \frac{1}{1 + \frac{2R}{1+F} (1 - 2F + \Phi) p_0 (1 - p_0)} = \frac{1}{1 + 2 (1 - p_0) \frac{\theta b}{1+F}}, R \right]$$

$$\left\{ \left\{ R \rightarrow - \frac{\theta b}{p_0 (-1 + 2F - \Phi)} \right\} \right\}$$

Below we define (i) the probability of no event between  $p_{0,A}(h)$  and  $1 - p_{0,A} (1 - h)$ , and the probability of mutation during the standing phase if no event occurs in the sweep phase.

```
PNoActFHM[Na_, s_, h_, F_,  $\Phi$ _, r_,  $\mu$ _] :=
  Exp[- (SweepIntFHM[Na, s, h, F,  $\Phi$ , r,  $\mu$ , Boostp0[Na, s, h, F]] -
    SweepIntFHM[Na, s, h, F,  $\Phi$ , r,  $\mu$ , 1 - Boostp0[Na, s, 1 - h, F]])]
```

```
PMutFHM[Na_, s_, h_, F_,  $\Phi$ _, r_,  $\mu$ _] :=
  PNoActFHM[Na, s, h, F,  $\Phi$ , r,  $\mu$ ] *  $\left( \frac{4 Na (1 - \text{Boostp0}[Na, s, h, F]) \mu}{1 + F + 4 Na (1 - \text{Boostp0}[Na, s, h, F]) \mu} \right)$ 
```

$\mathbb{E}[\pi/\pi_0]$  is the sum of the probabilities that recombination occurs during the sweep phase and standing phase respectively:

```
F[ $\sigma$ _] :=  $\frac{\sigma}{2 - \sigma}$ 
 $\Phi$ [r_,  $\sigma$ _] :=  $\frac{\sigma (2 - \sigma - 2 (1 - r) r (2 - 3 \sigma))}{(2 - \sigma) (2 - (1 - 2 (1 - r) r) \sigma)}$ 
ExpPiMut[Na_, s_, h_,  $\sigma$ _, r_,  $\mu$ _] := PRecFH0[Na, s, h, F[ $\sigma$ ],  $\Phi$ [r,  $\sigma$ ], r,  $\mu$ ] +
  PMutFH0[Na, s, h, F[ $\sigma$ ],  $\Phi$ [r,  $\sigma$ ], r,  $\mu$ ] + PMutFHM[Na, s, h, F[ $\sigma$ ],  $\Phi$ [r,  $\sigma$ ], r,  $\mu$ ]
```

## Plots - reduction in pairwise diversity

Below are the equations for  $\pi/\pi_0$  for std var sweep

```

SweepIntFH[Na_, s_, h_, F_,  $\Phi$ _, r_, p_] :=
-  $\frac{1}{2 Na s} \left( - \frac{1+F}{(F+h-F h) p} - \frac{(1+F) \text{Log}[1-p]}{1+(-1+F) h} + \left( (-1+F+F^2 (2-8 Na r+h (-3+8 Na r))) + \right. \right.$ 
 $\left. \left. h (3+4 Na r (1+\Phi)) - 4 F Na r (-1-\Phi+h (3+\Phi)) \right) \text{Log}[p] \right) / (F+h-F h)^2 -$ 
 $\frac{1}{(1+(-1+F) h) (F+h-F h)^2} \left( -1+F^3 (-1+h (4-8 Na r)+h^2 (-4+8 Na r)) + \right.$ 
 $\left. 4 h (1+Na r (1+\Phi)) - 4 h^2 (1+Na r (1+\Phi)) + \right.$ 
 $\left. F (1+4 Na r (1+\Phi) - 4 h (1+2 Na r (2+\Phi)) + 4 h^2 (1+2 Na r (2+\Phi))) + \right.$ 
 $\left. F^2 (1-8 Na r+4 h (-1+Na r (5+\Phi)) - 4 h^2 (-1+Na r (5+\Phi))) \right)$ 
 $\text{Log}[F+h+p-F p-2 h p+F h (-1+2 p)] \Big)$ 

PRecPFH[Na_, s_, h_, F_,  $\Phi$ _, r_, p_] := (2 r (1-2 F+ $\Phi$ ) (1-p))
Exp[-(SweepIntFH[Na, s, h, F,  $\Phi$ , r, p] -
SweepIntFH[Na, s, h, F,  $\Phi$ , r, 1-Boostp0[Na, s, 1-h, F]])]
PRecFHp0[Na_, s_, h_, F_,  $\Phi$ _, r_, p0_] := NIntegrate[PRecPFH[Na, s, h, F,  $\Phi$ , r, p] /
(s (1-p) p (F+h-F h + (1-F) (1-2 h) p)), {p, p0, 1-Boostp0[Na, s, 1-h, F]}]
PNoActFH[Na_, s_, h_, F_,  $\Phi$ _, r_, p0_] := Exp[-(SweepIntFH[Na, s, h, F,  $\Phi$ , r, p0] -
SweepIntFH[Na, s, h, F,  $\Phi$ , r, 1-Boostp0[Na, s, 1-h, F]])]
PRecp0FH[Na_, s_, h_, F_,  $\Phi$ _, r_, p0_] := PNoActFH[Na, s, h, F,  $\Phi$ , r, p0] *
 $\left( \frac{4 Na r (1-2 F+\Phi) (1-p0) p0}{1+F+4 Na r (1-2 F+\Phi) (1-p0) p0} \right)$ 
ExPiSV[Na_, s_, h_,  $\sigma$ _, r_, p0_] := PRecp0FH[Na, s, h, F[ $\sigma$ ],  $\Phi$ [r,  $\sigma$ ], r, p0] +
PRecFHp0[Na, s, h, F[ $\sigma$ ],  $\Phi$ [r,  $\sigma$ ], r, p0]

```

‘PiSw’ is the recombination value, above which the standing variation model shows higher diversity than the mutation model. Note that we use the approximate recombination scaling (1-F) instead of (1-2F+ $\Phi$ ):

$$\text{PiSw}[\theta_, F_, p0_] := \frac{\theta}{(1-F) p0}$$

Comparing std var (solid lines) to mutation case (dashed lines). f0 = 5%, F = 0.

Here, the recurrent mutation case gives different outcomes with varying dominance coefficients, while standing variation case does not.

```

ExpPi0 = Plot[ { ExpPiSV[5000, 0.05, 0.5, 0,  $\frac{R}{10\,000}$ , 0.05],
  ExpPiMut[5000, 0.05, 0.5, 0,  $\frac{R}{10\,000}$ ,  $\frac{0.2}{10\,000}$ ],
  ExpPiSV[5000, 0.05, 0.1, 0,  $\frac{R}{10\,000}$ , 0.05], ExpPiMut[5000, 0.05,
  0.1, 0,  $\frac{R}{10\,000}$ ,  $\frac{0.2}{10\,000}$ ], ExpPiSV[5000, 0.05, 0.9, 0,  $\frac{R}{10\,000}$ , 0.05],
  ExpPiMut[5000, 0.05, 0.95, 0,  $\frac{R}{10\,000}$ ,  $\frac{0.2}{10\,000}$ ] }, {R, 0, 120},
  PlotRange → All, PlotStyle → {{Black, Thick}, {Black, Dashed, Thick},
    {Red, Thick}, {Red, Dashed, Thick}, {Blue}, {Blue, Dashed, Thick}},
  GridLines → {{PiSw[0.2, 0, 0.05]}, {}}, Frame → {{True, False}, {True, False}},
  BaseStyle → {FontWeight → "Bold", FontColor → Black, FontSize → 16},
  GridLinesStyle → Directive[Black, Thick, Dashed], ImageSize → 375]

```

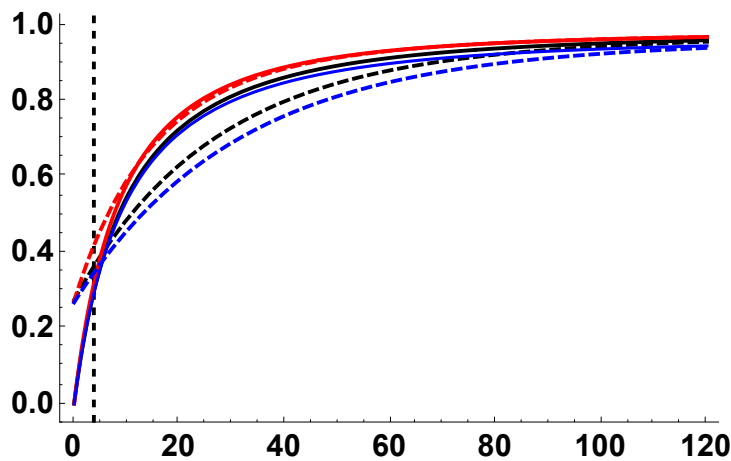

Ratio of the std var to mutation case



```

RatPis0 = Plot[{ExpPiSV[5000, 0.05, 0.5, 0,  $\frac{R}{10000}$ , 0.05] /
  ExpPiMut[5000, 0.05, 0.5, 0,  $\frac{R}{10000}$ ,  $\frac{0.2}{10000}$ ],
  ExpPiSV[5000, 0.05, 0.1, 0,  $\frac{R}{10000}$ , 0.05] / ExpPiMut[5000, 0.05, 0.1,
    0,  $\frac{R}{10000}$ ,  $\frac{0.2}{10000}$ ], ExpPiSV[5000, 0.05, 0.9, 0,  $\frac{R}{10000}$ , 0.05] /
    ExpPiMut[5000, 0.05, 0.9, 0,  $\frac{R}{10000}$ ,  $\frac{0.2}{10000}$ ]}], {R, 0, 120},
  PlotRange → All, PlotStyle → {{Black, Thick}, {Red, Thick}, {Blue, Thick}},
  GridLines → {{PiSw[0.2, 0, 0.05]}, {1}},
  Frame → {{True, False}, {True, False}},
  BaseStyle → {FontWeight → "Bold", FontColor → Black, FontSize → 16},
  GridLinesStyle → Directive[Black, Thick, Dashed], ImageSize → 375]

```

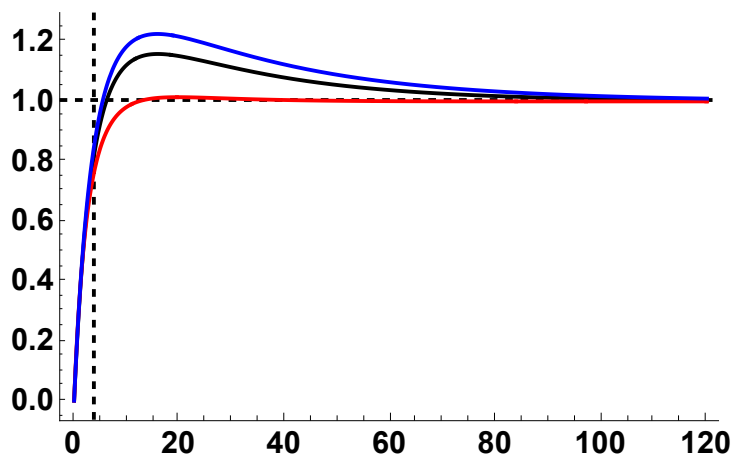

Comparing std var to mutation case.  $f_0 = 0.05$ ,  $\sigma = 0.95$ .

Interestingly, sweep signatures are stronger for recurrent mutation as opposed to standing variation. In the sense that they are stretched out over longer regions of the genome.

```

ExPi095 = Plot[{ExPiSV[5000, 0.05, 0.5, 0.95,  $\frac{R}{10\,000}$ , 0.05],
  ExPiMut[5000, 0.05, 0.5, 0.95,  $\frac{R}{10\,000}$ ,  $\frac{0.2}{10\,000}$ ],
  ExPiSV[5000, 0.05, 0.1, 0.95,  $\frac{R}{10\,000}$ , 0.05], ExPiMut[5000, 0.05, 0.1,
  0.95,  $\frac{R}{10\,000}$ ,  $\frac{0.2}{10\,000}$ ], ExPiSV[5000, 0.05, 0.9, 0.95,  $\frac{R}{10\,000}$ , 0.05],
  ExPiMut[5000, 0.05, 0.95, 0.95,  $\frac{R}{10\,000}$ ,  $\frac{0.2}{10\,000}$ ]}, {R, 0, 2000},
  PlotRange → {All, {0, 1}}, PlotStyle → {{Black, Thick}, {Black, Dashed, Thick},
    {Red, Thick}, {Red, Dashed, Thick}, {Blue, Thick}, {Blue, Dashed, Thick}},
  GridLines → {{PiSw[0.2,  $\frac{0.95}{2 - 0.95}$ , 0.05]}, {}},
  Frame → {{True, False}, {True, False}},
  BaseStyle → {FontWeight → "Bold", FontColor → Black, FontSize → 16},
  GridLinesStyle → Directive[Black, Thick, Dashed], ImageSize → 375]

```

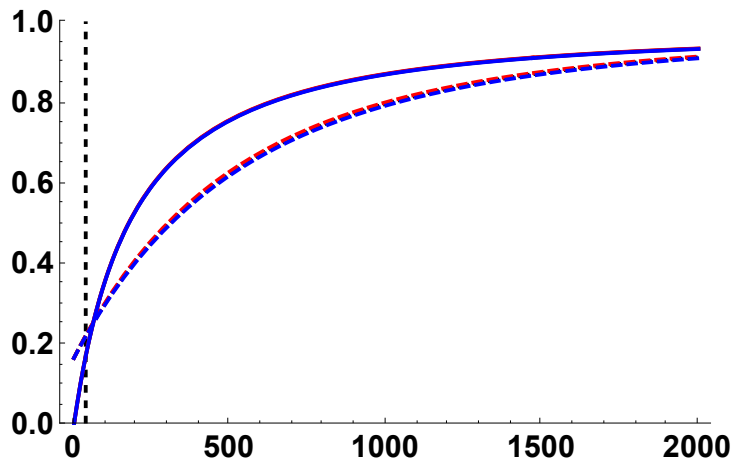

RatPis095 =

```
Plot[{ExpPiSV[5000, 0.05, 0.5, 0.95,  $\frac{R}{10\,000}$ , 0.05] / ExpPiMut[5000, 0.05, 0.5,
  0.95,  $\frac{R}{10\,000}$ ,  $\frac{0.2}{10\,000}$ ], ExpPiSV[5000, 0.05, 0.1, 0.95,  $\frac{R}{10\,000}$ , 0.05] /
  ExpPiMut[5000, 0.05, 0.1, 0.95,  $\frac{R}{10\,000}$ ,  $\frac{0.2}{10\,000}$ ],
  ExpPiSV[5000, 0.05, 0.9, 0.95,  $\frac{R}{10\,000}$ , 0.05] /
  ExpPiMut[5000, 0.05, 0.9, 0.95,  $\frac{R}{10\,000}$ ,  $\frac{0.2}{10\,000}$ ]}], {R, 0, 2000},
PlotRange -> All, PlotStyle -> {{Black, Thick}, {Red, Thick}, {Blue, Thick}},
GridLines -> {{PiSw[0.2,  $\frac{0.95}{2 - 0.95}$ , 0.05]}, {1}},
Frame -> {{True, False}, {True, False}},
BaseStyle -> {FontWeight -> "Bold", FontColor -> Black, FontSize -> 16},
GridLinesStyle -> Directive[Black, Thick, Dashed], ImageSize -> 375]
```

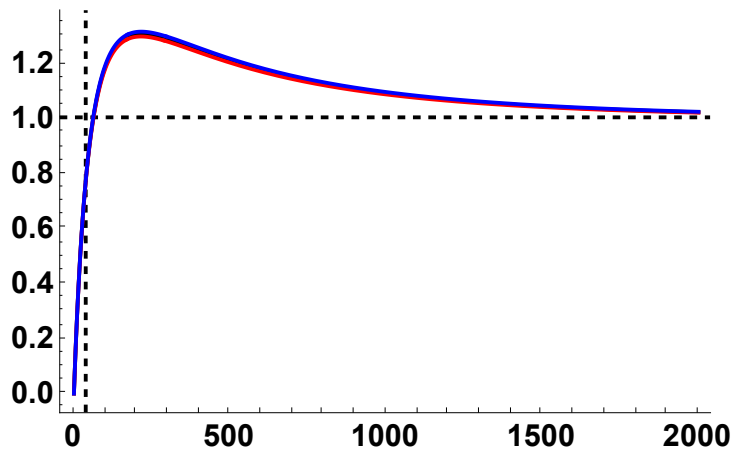

Graphics grid:

```

SVandMut =
  Labeled[Grid[{{, Text@TraditionalForm@Style[" $\sigma = 0.00 \backslash n (F = 0.00)$ ", 24],
    Text@TraditionalForm@Style[" $\sigma = 0.95 \backslash n (F \approx 0.90)$ ", 24]},
    {Text@TraditionalForm@Style[" $\mathbb{E}[\pi_{SV}/\pi_0]$ ,  $\backslash n \mathbb{E}[\pi_M/\pi_0]$ ", 24], ExPis0, ExPis095},
    {Text@TraditionalForm@Style[" $\mathbb{E}[\pi_{SV}/\pi_0] \backslash n \text{---} \backslash n \mathbb{E}[\pi_M/\pi_0]$ ", 24],
    RatPis0, RatPis095}}, Spacings -> {2, 1}},
  {Text@TraditionalForm@Style["Scaled Recombination Rate,  $2Nr$ ", 24]}, {Bottom}]

```

$\sigma = 0.00$   
( $F = 0.00$ )

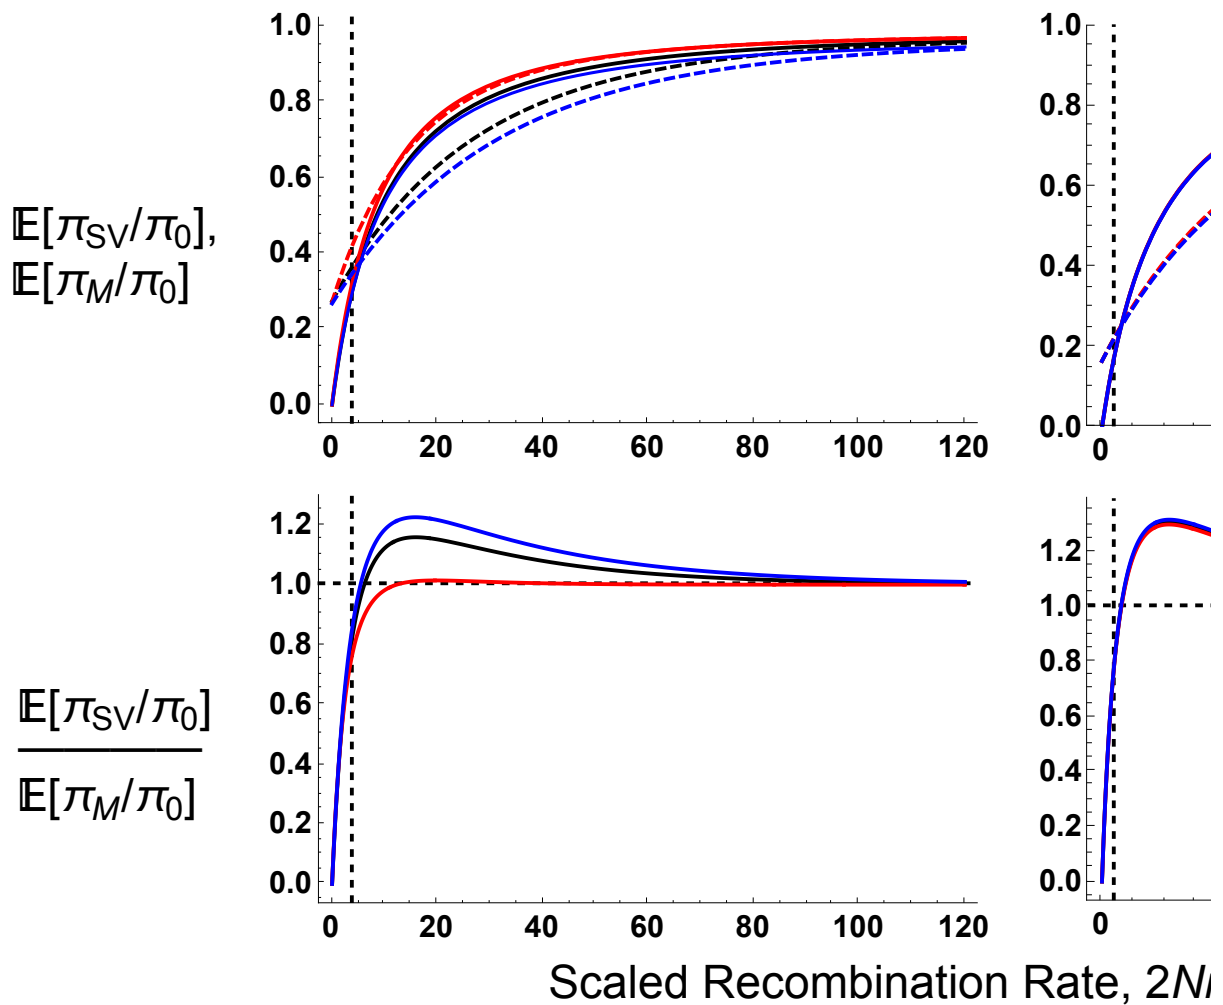

## Plots – Site Frequency Spectrum (SFS)

### Equations

For SFS from standing variation:

$$F[\sigma_] := \frac{\sigma}{2 - \sigma};$$

$$\bar{\sigma}[r_, \sigma_] := \frac{\sigma (2 - \sigma - 2 (1 - r) r (2 - 3 \sigma))}{(2 - \sigma) (2 - (1 - 2 (1 - r) r) \sigma)};$$

$$\text{PNR}[\text{Na}_-, F_-, \bar{\sigma}_-, s_-, h_-, R_-, p0_-] := \left( \left( \frac{(F + h - F h)}{(1 - h + F h)} \left( \frac{1}{p0} + 1 \right) - 1 \right)^{-\frac{R (1 - F)}{2 \text{Na} (F + h - F h) s}} \right);$$

$$\begin{aligned} \text{PrKR}[k_-, n_-, R_-, F_-, \bar{\sigma}_-, p0_-] := & \left( \left( 2 \frac{R}{1 + F} (1 - 2 F + \bar{\sigma}) p0 (1 - p0) \right)^k \text{Abs}[\text{StirlingS1}[n, k]] \right) / \\ & \text{Product} \left[ \left( 2 \frac{R}{1 + F} (1 - 2 F + \bar{\sigma}) p0 (1 - p0) + a \right), \{a, 0, n - 1\} \right]; \end{aligned}$$

$$\text{PrJ}[j_-, k_-] := \frac{1}{j \text{Sum} \left[ \frac{1}{a}, \{a, k - 1\} \right]};$$

$$\begin{aligned} \text{H}[g_-, j_-, k_-, n_-, i_-] := & (\text{Binomial}[n - i, g] * \text{Binomial}[k, j - g]) / \text{Binomial}[k + n - i, j]; \\ \text{PrL}[n_-, k_-, j_-, l_-] := & ((\text{Binomial}[n, l] * \text{Abs}[\text{StirlingS1}[l, j]] * \text{Abs}[\text{StirlingS1}[n - l, k - j]]) / \\ & (\text{Binomial}[k, j] * \text{Abs}[\text{StirlingS1}[n, k]])); \end{aligned}$$

$$\begin{aligned} \text{TFixI}[\text{Na}_-, s_-, h_-, F_-, p0_-] := & \frac{\text{EulerGamma} + \text{Log} \left[ \frac{4 \text{Na} s (1 - (1 - F) h) (1 - p0)}{1 + F} \right]}{s (1 - (1 - F) h)} - \frac{\text{Log}[p0]}{s (h + F - h F)} + \\ & \frac{(1 - F) (1 - 2 h)}{s (h + F - h F) (1 - (1 - F) h)} \text{Log} \left[ \frac{h + F - h F + (1 - F) (1 - 2 h) p0}{1 - (1 - F) h} \right] \end{aligned}$$

$$\text{TFixIC}[\text{Na}_-, s_-, h_-, F_-, p0_-] := \frac{(1 + F) \text{TFixI}[\text{Na}, s, h, F, p0]}{2 \text{Na}}$$

$$\text{Boostp0}[\text{Na}_-, s_-, h_-, \sigma_-] := \frac{1 + F[\sigma]}{4 \text{Na} s (F[\sigma] + h - F[\sigma] h)}$$

$$\begin{aligned}
& \text{PLNH}[\text{Na}_-, \text{s}_-, \text{h}_-, \sigma_-, \text{R}_-, \text{n}_-, \text{l}_-, \text{p0}_-, \theta_-] := \\
& \text{Sum}\left[\text{PDF}\left[\text{BinomialDistribution}\left[\text{n}, \text{PNR}\left[\text{Na}, \text{F}[\sigma], \Phi\left[\frac{\text{R}}{2 \text{Na}}, \sigma\right], \text{s}, \text{h}, \text{R}, \text{p0}\right]\right], \text{i}\right] * \right. \\
& \left. \left( \text{Piecewise}\left[\left\{\left\{\text{Sum}\left[\text{PrKR}\left[\text{k}, \text{i}, \text{R}, \text{F}[\sigma], \Phi\left[\frac{\text{R}}{2 \text{Na}}, \sigma\right], \text{p0}\right] * \right. \right. \right. \right. \right. \right. \right. \\
& \quad \text{Sum}\left[\text{PrJ}\left[\text{j}, \text{k} + \text{n} - \text{i}\right] * \text{Sum}\left[\text{H}\left[\text{g}, \text{j}, \text{k}, \text{n}, \text{i}\right] * \text{PrL}\left[\text{i}, \text{k}, \text{j} - \text{g}, \text{l} - \text{g}\right], \right. \right. \\
& \quad \quad \left. \left\{\text{g}, \text{Max}\left[\left\{\text{j} - \text{k}, \text{l} - \text{i}\right\}\right], \text{Min}\left[\left\{\text{j}, \text{l}, \text{n} - \text{i}\right\}\right]\right\}, \left\{\text{j}, 1, \right. \right. \\
& \quad \quad \left. \left. \text{Min}\left[\left\{\text{k} + \text{n} - \text{i} - 1, \text{l}\right\}\right]\right\}, \left\{\text{k}, 1, \text{i}\right\}, \left\{0 < \text{i} < \text{n}\right\}, \left\{0, \text{i} = 0 \mid \mid \text{i} = \text{n}\right\}\right\} \right] + \\
& \quad \text{Piecewise}\left[\left\{\left\{\frac{1}{\text{l Sum}\left[\frac{1}{\text{a}}, \left\{\text{a}, \text{n} - 1\right\}\right]}\right\}, \text{i} = 0\right\}, \left\{0, \text{i} \neq 0\right\}\right\} \right] + \\
& \quad \text{Piecewise}\left[\left\{\left\{\text{PrKR}\left[1, \text{i}, \text{R}, \text{F}[\sigma], \Phi\left[\frac{\text{R}}{2 \text{Na}}, \sigma\right], \text{p0}\right] * \text{Piecewise}\left[\right. \right. \right. \\
& \quad \quad \left. \left\{\left\{\theta * \text{p0} + \frac{\theta \text{n}}{2} \text{TFixIC}\left[\text{Na}, \text{s}, \text{h}, \text{F}[\sigma], \text{p0}\right], \text{l} = 1\right\}, \left\{\frac{\theta * \text{p0}}{\text{l}}, \text{l} \neq 1\right\}\right\}\right\} \right] + \\
& \quad \text{Sum}\left[\text{PrKR}\left[\text{k}, \text{i}, \text{R}, \text{F}[\sigma], \Phi\left[\frac{\text{R}}{2 \text{Na}}, \sigma\right], \text{p0}\right] * \text{Sum}\left[\text{PrJ}\left[\text{j}, \text{k}\right] * \text{PrL}\left[\text{n}, \text{k}, \text{j}, \text{l}\right], \right. \right. \\
& \quad \quad \left. \left. \left\{\text{j}, 1, \text{Min}\left[\left\{\text{k} - 1, \text{l}\right\}\right]\right\}, \left\{\text{k}, 2, \text{n}\right\}, \text{i} = \text{n}\right\}, \left\{0, \text{i} \neq \text{n}\right\}\right\} \right] \right], \left\{\text{i}, 0, \text{n}\right\} \right]
\end{aligned}$$

$$\begin{aligned}
& \text{PLNHS}[\text{Na}_-, \text{s}_-, \text{h}_-, \sigma_-, \text{R}_-, \text{n}_-, \text{p0}_-, \theta_-] := \\
& \quad \text{Sum}\left[\text{PLNH}\left[\text{Na}, \text{s}, \text{h}, \sigma, \text{R}, \text{n}, \text{L}, \text{p0}, \theta\right], \left\{\text{L}, 1, \text{n} - 1\right\}\right] \\
& \text{PLNH2}[\text{Na}_-, \text{s}_-, \text{h}_-, \sigma_-, \text{R}_-, \text{n}_-, \text{l}_-, \text{p0}_-, \theta_-] := \frac{\text{PLNH}\left[\text{Na}, \text{s}, \text{h}, \sigma, \text{R}, \text{n}, \text{l}, \text{p0}, \theta\right]}{\text{PLNHS}\left[\text{Na}, \text{s}, \text{h}, \sigma, \text{R}, \text{n}, \text{p0}, \theta\right]}
\end{aligned}$$

Modifying equations for the SFS from standing variation to account for different Ewens' Sampling Formula under the recurrent mutation case:

$$F[\sigma_] := \frac{\sigma}{2 - \sigma};$$

$$\Phi[r_, \sigma_] := \frac{\sigma (2 - \sigma - 2 (1 - r) r (2 - 3 \sigma))}{(2 - \sigma) (2 - (1 - 2 (1 - r) r) \sigma)};$$

$$\text{PNR}[\text{Na}_-, F_-, \Phi_-, s_-, h_-, R_-, p0_-] := \left( \left( \frac{(F + h - F h)}{(1 - h + F h)} \left( \frac{1}{p0} + 1 \right) - 1 \right)^{-\frac{R (1 - F)}{2 \text{Na} (F + h - F h) s}} \right);$$

$$\text{PrKRM}[k_-, n_-, F_-, \theta_-] := \frac{\left(2 \frac{\theta}{1 + F}\right)^k \text{Abs}[\text{StirlingS1}[n, k]]}{\text{Product}\left[\left(2 \frac{\theta}{1 + F} + a\right), \{a, \theta, n - 1\}\right]}$$

$$\text{PrJ}[j_-, k_-] := \frac{1}{j \text{Sum}\left[\frac{1}{a}, \{a, k - 1\}\right]};$$

$$\text{H}[g_-, j_-, k_-, n_-, i_-] := (\text{Binomial}[n - i, g] * \text{Binomial}[k, j - g]) / \text{Binomial}[k + n - i, j];$$

$$\text{PrL}[n_-, k_-, j_-, l_-] := ((\text{Binomial}[n, l] * \text{Abs}[\text{StirlingS1}[l, j]] * \text{Abs}[\text{StirlingS1}[n - l, k - j]]) / (\text{Binomial}[k, j] * \text{Abs}[\text{StirlingS1}[n, k]]));$$

$$\begin{aligned} \text{TFixI}[\text{Na}_-, s_-, h_-, F_-, p0_-] := & \frac{\text{EulerGamma} + \text{Log}\left[\frac{4 \text{Na} s (1 - (1 - F) h) (1 - p0)}{1 + F}\right]}{s (1 - (1 - F) h)} - \frac{\text{Log}[p0]}{s (h + F - h F)} + \\ & \frac{(1 - F) (1 - 2 h)}{s (h + F - h F) (1 - (1 - F) h)} \text{Log}\left[\frac{h + F - h F + (1 - F) (1 - 2 h) p0}{1 - (1 - F) h}\right] \end{aligned}$$

$$\text{TFixIC}[\text{Na}_-, s_-, h_-, F_-, p0_-] := \frac{(1 + F) \text{TFixI}[\text{Na}, s, h, F, p0]}{2 \text{Na}}$$

$$\text{Boostp0}[\text{Na}_-, s_-, h_-, F_-] := \frac{1 + F}{4 \text{Na} s (F + h - F h)}$$

```

PLNHM[Na_, s_, h_, σ_, R_, n_, l_, θ_, θ_] :=
  Sum[PDF[BinomialDistribution[n, PNR[Na, F[σ],
    Φ[ $\frac{R}{2Na}$ , σ], s, h, R, Boostp0[Na, s, h, F[σ]]]], i] * (
    Piecewise[
      {{Sum[PrKRM[k, i, F[σ], θ] * Sum[PrJ[j, k + n - i] * Sum[H[g, j, k, n, i] *
        PrL[i, k, j - g, l - g], {g, Max[{j - k, l - i}], Min[{j, l, n - i}]}], {j,
        1, Min[{k + n - i - 1, l}]}], {k, 1, i}], θ < i < n}, {θ, i == 0 || i == n}}] +
      Piecewise[{{ $\frac{1}{l \text{ Sum}[\frac{1}{a}, \{a, n - 1\}]}$ , i == 0}, {θ, i ≠ 0}}] +
      Piecewise[{{PrKRM[1, i, F[σ], θ] * Piecewise[
        {{θ * Boostp0[Na, s, h, F[σ]] +  $\frac{\theta n}{2}$  TFixIC[Na, s, h, F[σ], Boostp0[Na,
          s, h, F[σ]]], l == 1}, { $\frac{1}{l}$  θ * Boostp0[Na, s, h, F[σ]], l ≠ 1}}] +
        Sum[PrKRM[k, i, F[σ], θ] * Sum[PrJ[j, k] * PrL[n, k, j, l], {j, 1, k - 1}],
        {k, 2, n}], i == n}, {θ, i ≠ n}}]
    ], {i, 0, n}]

PLNHMS[Na_, s_, h_, σ_, R_, n_, θ_, θ_] :=
  Sum[PLNHM[Na, s, h, σ, R, n, l, θ, θ], {l, 1, n - 1}]

PLNHM2[Na_, s_, h_, σ_, R_, n_, l_, θ_, θ_] :=  $\frac{\text{PLNHM}[Na, s, h, \sigma, R, n, l, \theta, \theta]}{\text{PLNHMS}[Na, s, h, \sigma, R, n, \theta, \theta]}$ 

```

## Figures

Standing variation case (5%, black) vs recurrent mutation ( $\Theta = 0.2$ , red),  $\sigma = 0$ ,  $R = 2$



SFSM1 =

```
ListPlot[{Table[{l, PLNH2[5000, 0.05, 0.5, 0, 2, 10, l, 0.05, 4]}, {l, 1, 9}],
  Table[{l, PLNHM2[5000, 0.05, 0.5, 0, 2, 10, l, 0.2, 4]}, {l, 1, 9}],
  Table[{l, PrJ[l, 10]}], {l, 1, 9}]], PlotRange → All,
PlotStyle → {Black, Red, {Gray, Dashed}}, Joined → True,
BaseStyle → {FontWeight → "Bold", FontColor → Black, FontSize → 16},
Ticks → {{1, 2, 3, 4, 5, 6, 7, 8, 9}, Automatic}, ImageSize → 375]
```

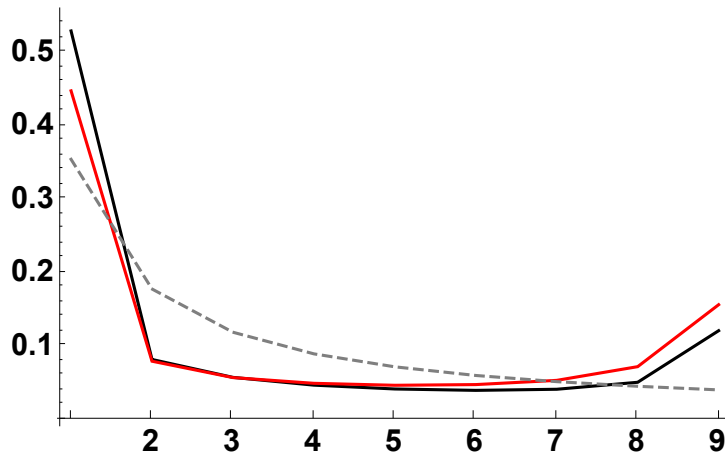

Standing variation case (5%, black) vs recurrent mutation ( $\Theta = 0.2$ , red),  $\sigma = 0$ ,  $R = 10$

SFSM2 =

```
ListPlot[{Table[{l, PLNH2[5000, 0.05, 0.5, 0, 10, 10, l, 0.05, 4]}, {l, 1, 9}],
  Table[{l, PLNHM2[5000, 0.05, 0.5, 0, 10, 10, l, 0.2, 4]}, {l, 1, 9}],
  Table[{l, PrJ[l, 10]}], {l, 1, 9}]], PlotRange → All,
PlotStyle → {Black, Red, {Gray, Dashed}}, Joined → True,
BaseStyle → {FontWeight → "Bold", FontColor → Black, FontSize → 16},
Ticks → {{1, 2, 3, 4, 5, 6, 7, 8, 9}, Automatic}, ImageSize → 375]
```

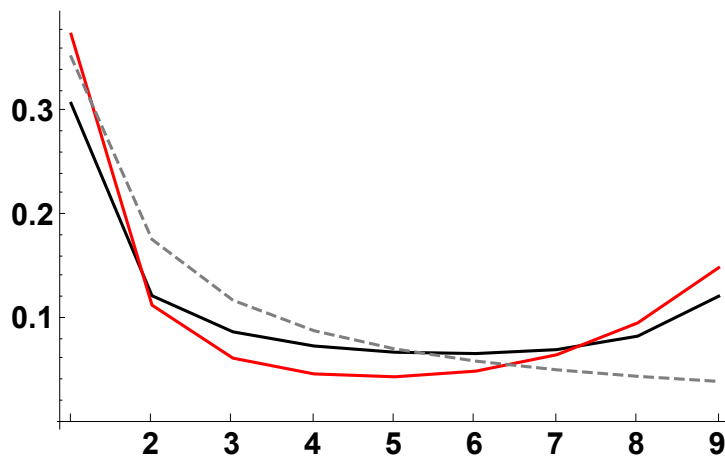

Standing variation case (5%, black) vs recurrent mutation ( $\Theta = 0.2$ , red),  $\sigma = 0.95$ ,  $R = 10$

```

SFSM3 = ListPlot[
  {Table[{l, PLNH2[5000, 0.05, 0.5, 0.95, 10, 10, l, 0.05,  $\frac{4}{1 + \frac{0.95}{2-0.95}}$ ]}, {l, 1, 9}],
   Table[{l, PLNHM2[5000, 0.05, 0.5, 0.95, 10, 10, l, 0.2,  $\frac{4}{1 + \frac{0.95}{2-0.95}}$ ]}, {l, 1, 9}],
   Table[{l, PrJ[l, 10]}, {l, 1, 9}]}, PlotRange → All,
  PlotStyle → {Black, Red, {Gray, Dashed}}, Joined → True,
  BaseStyle → {FontWeight → "Bold", FontColor → Black, FontSize → 16},
  Ticks → {{1, 2, 3, 4, 5, 6, 7, 8, 9}, Automatic}, ImageSize → 375]

```

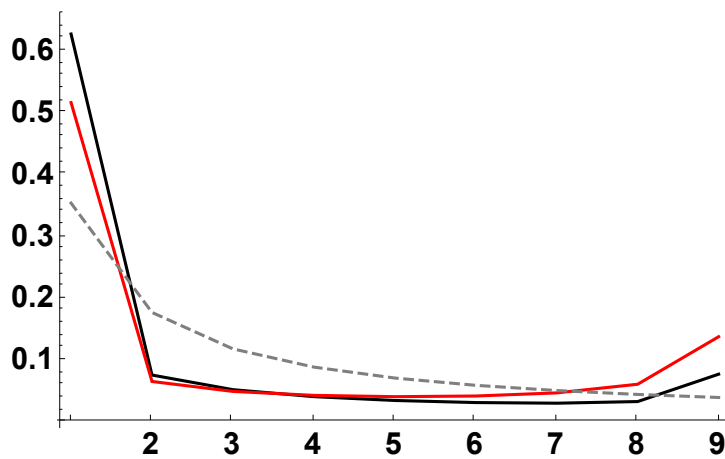

Standing variation case (5%, black) vs recurrent mutation ( $\Theta = 0.2$ , red),  $\sigma = 0.95$ ,  $R = 100$

```

SFSM4 = ListPlot[
  {Table[{l, PLNH2[5000, 0.05, 0.5, 0.95, 100, 10, l, 0.05,  $\frac{4}{1 + \frac{0.95}{2-0.95}}$ ]}, {l, 1, 9}],
   Table[{l, PLNHM2[5000, 0.05, 0.5, 0.95, 100, 10, l, 0.2,  $\frac{4}{1 + \frac{0.95}{2-0.95}}$ ]}, {l, 1, 9}],
   Table[{l, PrJ[l, 10]}, {l, 1, 9}]}, PlotRange → All,
  PlotStyle → {Black, Red, {Gray, Dashed}}, Joined → True,
  BaseStyle → {FontWeight → "Bold", FontColor → Black, FontSize → 16},
  Ticks → {{1, 2, 3, 4, 5, 6, 7, 8, 9}, Automatic}, ImageSize → 375]

```

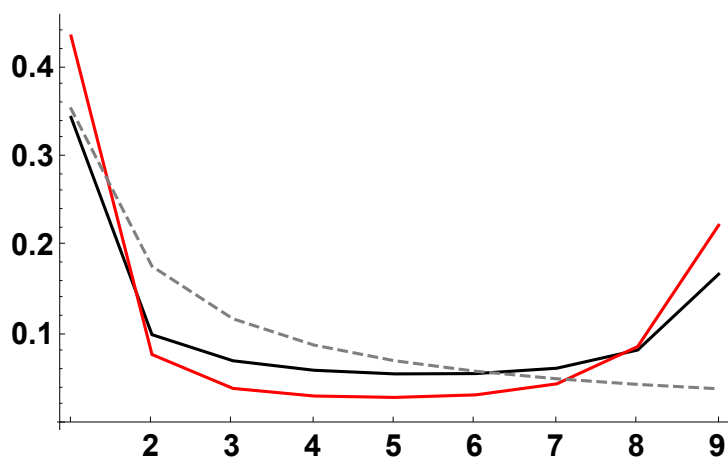

Graphics grid:

```
SVandMutSFS = Labeled[Grid[{{Text@TraditionalForm@Style["R = 2", 24],
  Text@TraditionalForm@Style["R = 10", 24],},
{SFSM1, SFSM2, Text@TraditionalForm@Style[" $\sigma = 0.00$ \n( $F = 0.00$ )", 24]},
{Text@TraditionalForm@Style["R = 10", 24],
  Text@TraditionalForm@Style["R = 100", 24],},
{SFSM3, SFSM4, Text@TraditionalForm@Style[" $\sigma = 0.95$ \n( $F \approx 0.90$ )", 24]}},
Spacings → {2, 1}], {Text@TraditionalForm@Style["Frequency", 24],
Text@TraditionalForm@Style["Derived Allele Count", 24]}, {Left, Bottom}]
```

$R = 2$

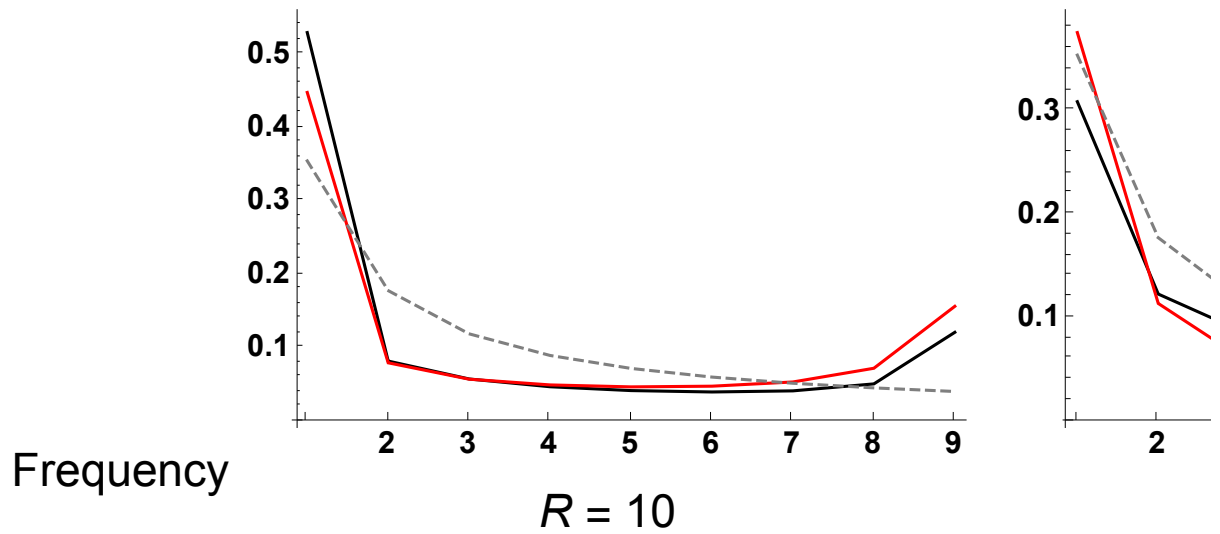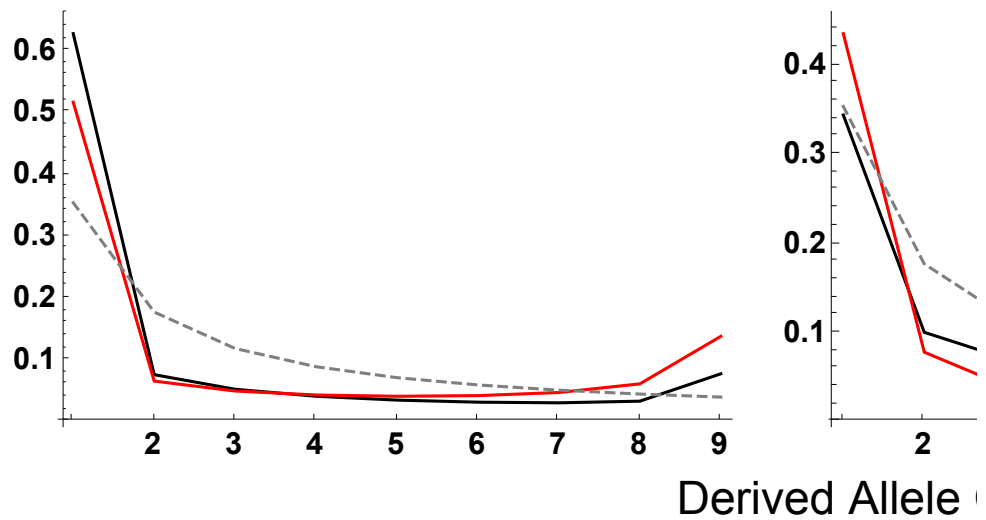

Supplement: Supplementary file 1 [file 1]
